# Supplementary material
Source: Research Square preprint supplement (doi:10.21203/rs.3.rs-8947218/v1)
Supplement: Supplementary file 1 [file 08ba0553f34e95b074c1c593.xlsx]

## Sheet: Sheet1
Table S1 Reorganization of Plasmid Sequences
Plasmid	Primer	Primer Sequence (5’➡3’)
pSLenti-U6-shRNA(RPSAP52)-CMV-EGFP-F2A-Puro-WPRE	RPSAP52-F	CCGGGGATGTCCTTAAGCTCCTTCTCAAGAGAAAGGAGCTTAAGGACATCCTTTTTTG
	RPSAP52-R	AATTCAAAAAAATGGAACAGTACATCTATAAACTCGAGTTTATAGATGTACTGTTCCAT
pSLenti-U6-shRNA(NC2)-CMV-EGFP-F2A-Puro-WPRE	GL427NC2-F	CCGGCCTAAGGTTAAGTCGCCCTCGCTCGAGCGAGGGCGACTTAACCTTAGGTTTTTTG
	GL427NC2-R	AATTCAAAAAACCTAAGGTTAAGTCGCCCTCGCTCGAGCGAGGGCGACTTAACCTTAGG
