# Supplementary material
Source: Research Square preprint supplement (doi:10.21203/rs.3.rs-8947218/v1)
Supplement: Supplementary file 2 [file 0b51b6452b1eaca652218e11.xlsx]

## Sheet: Uni_cox_P592
	gene	P.value	HR	Low.95.CI	High.95.CI
1	RP11-443P15.2	0.38851	1	0.99	1.02
2	SLC7A11	0.00838	1.01	1	1.01
3	FAM50B	0.32157	0.98	0.93	1.02
4	TNIP3	0.10458	1.09	0.98	1.21
5	TMPRSS11D	0.27333	1.01	0.99	1.02
6	FGFBP2	0.74723	1	0.97	1.02
7	RPL39L	0.82995	1	0.98	1.01
8	RP1-27K12.2	0.17981	1.03	0.99	1.07
9	CLDN10	0.0001	1.17	1.08	1.27
10	IL31RA	0.00176	1.38	1.13	1.69
11	LSP1	0.18816	1	0.99	1
12	CES1	0.02583	1	1	1
13	RUNX3	0.84715	1	0.96	1.04
14	PI3	0.20511	1	1	1
15	LINC00942	0.01086	1.02	1	1.03
16	CD70	0.77478	1	0.97	1.03
17	BNC1	0.01765	1.02	1	1.04
18	NFE4	0.53006	1.01	0.98	1.03
19	OSGIN1	0.02386	1.02	1	1.03
20	KCNQ5	0.34618	1.13	0.88	1.46
21	PTPRZ1	0.4065	1.01	0.99	1.03
22	ARSJ	0.10977	1.07	0.99	1.15
23	IL13RA2	0.46091	1	1	1.01
24	SLC47A2	0.15856	1.03	0.99	1.08
25	MEFV	0.04712	1.17	1	1.38
26	LRRC38	0.54882	0.97	0.86	1.08
27	ITLN1	0.29659	1	1	1
28	KRT6B	0.55703	1	1	1
29	BAAT	0.18673	0.64	0.33	1.24
30	RP11-680F8.1	0.09283	1.08	0.99	1.18
31	KLK13	0.19017	1.01	0.99	1.03
32	LRRC4	0.15258	1.07	0.97	1.18
33	CSF3	0.92609	1	0.99	1.01
34	DNASE1L3	0.89793	1	0.97	1.03
35	S100A3	0.10058	1	1	1
36	FOXC2	0.05055	1.03	1	1.06
37	FAM9C	0.6105	1.02	0.94	1.11
38	HSPD1P6	0.36163	0.97	0.91	1.03
39	KRT6C	0.45892	1	1	1
40	IL36G	0.75767	1	0.99	1.01
41	GRM3	0.2381	0.9	0.75	1.08
42	C1orf110	0.08024	1.02	1	1.05
43	LINC00520	0.62748	0.98	0.9	1.07
44	SLC10A6	0.35608	1.02	0.97	1.07
45	SPINK6	0.43456	1	1	1.01
46	CLEC2B	0.62007	1	0.99	1.01
47	NRG1	0.06408	1.05	1	1.11
48	IDO1	0.32272	1	0.99	1
49	GPC2	0.11379	0.96	0.9	1.01
50	SOX7	0.07601	1.03	1	1.06
51	FDCSP	0.39921	1	1	1
52	ABCA4	0.13215	1.02	0.99	1.04
53	LINC01139	0.02675	1.09	1.01	1.17
54	IGFBP6	0.17674	1	1	1
55	SPIB	0.51596	1	0.99	1
56	MRGPRX3	0.61935	0.98	0.92	1.05
57	PCSK9	0.16592	1.02	0.99	1.04
58	MT1L	0.16153	1	1	1.01
59	IQCA1	0.81904	0.99	0.89	1.09
60	RP11-557H15.3	0.44076	0.99	0.95	1.02
61	CASP1P2	0.22188	0.91	0.79	1.06
62	SCGB1A1	0.3982	1	1	1
63	LUCAT1	0.00089	1.17	1.07	1.28
64	UCP1	0.34277	0.94	0.82	1.07
65	VNN3	0.60456	0.94	0.73	1.21
66	SAA1	0.83255	1	1	1
67	VNN1	0.59151	0.99	0.95	1.03
68	ACY3	0.03768	0.87	0.77	0.99
69	TENM2	0.12699	1.02	0.99	1.05
70	KRT75	0.15138	1.01	1	1.02
71	APCDD1L-AS1	0.0153	1.12	1.02	1.22
72	LILRA5	0.97231	1	0.96	1.04
73	RNF212	0.47997	1.09	0.85	1.4
74	KRT15	0.40268	1	1	1
75	SPP1	0.02278	1	1	1
76	PRKCQ-AS1	0.75376	0.97	0.83	1.15
77	PRR33	0.29056	0.92	0.79	1.07
78	FGFBP1	0.39501	1	1	1
79	FMO3	0.10523	1.01	1	1.02
80	TGM1	0.56964	1	1	1.01
81	M1AP	0.97555	1	0.89	1.12
82	PAX7	0.25431	0.88	0.7	1.1
83	GS1-600G8.5	0.3819	0.99	0.98	1.01
84	RPE65	0.20006	1.09	0.95	1.25
85	WNT3A	0.18981	1.07	0.97	1.18
86	CEACAM3	0.70238	1.15	0.56	2.34
87	TLL1	0.05238	1.11	1	1.24
88	S100A7	0.63099	1	1	1
89	TSPAN7	0.00596	1.01	1	1.02
90	AC007879.7	0.01054	1.04	1.01	1.06
91	NCF1B	0.07862	0.86	0.73	1.02
92	RP5-1171I10.5	0.35221	0.97	0.91	1.04
93	AC096559.1	0.89361	0.94	0.41	2.17
94	NCF1C	0.07312	0.93	0.87	1.01
95	NCF1	0.07589	0.9	0.8	1.01
96	NKAIN1	0.49902	0.97	0.89	1.06
97	RP11-993B23.3	0.17888	1.08	0.97	1.2
98	TCL1A	0.37642	0.98	0.95	1.02
99	KRT17P3	0.60388	1.01	0.98	1.03
100	CD38	0.29491	0.96	0.89	1.04
101	TM4SF19	0.28606	1.03	0.98	1.08
102	STEAP1B	0.02688	1.07	1.01	1.14
103	SPRR2A	0.46146	1	1	1
104	IRX2	0.70006	0.99	0.92	1.06
105	RP11-411K7.1	0.968	1	0.83	1.22
106	SH2D5	0.99506	1	0.9	1.11
107	ALDH3A1	0.65828	1	1	1
108	NEFL	0	1.02	1.01	1.02
109	SLC47A1	0.00029	1.17	1.07	1.27
110	LTF	0.44379	1	1	1
111	EMR1	0.68163	1.02	0.94	1.1
112	CCL20	0.79002	1	1	1
113	AKR1C7P	0.01052	1.15	1.03	1.29
114	PTHLH	0.06287	1	1	1.01
115	ADH6	0.32803	0.97	0.93	1.03
116	RP11-834C11.7	0.03903	0.58	0.35	0.97
117	CEACAM4	0.74254	1.03	0.85	1.26
118	TLR10	0.58963	0.97	0.88	1.08
119	C16orf54	0.4481	0.98	0.92	1.04
120	CACNG8	0.85874	1.04	0.65	1.68
121	CTA-392E5.1	0.33667	0.99	0.96	1.02
122	CTC-573N18.1	0.31831	1.08	0.93	1.27
123	SBSN	0.27198	1	1	1
124	KLK10	0.49054	1	1	1.01
125	FABP7	0.51568	1	0.99	1
126	ROS1	0.08677	1.04	0.99	1.09
127	RP11-104E19.1	0.00862	1.3	1.07	1.57
128	RP11-297P16.4	0.29495	1	0.99	1
129	AC004870.4	0.02991	1.13	1.01	1.26
130	CD209	0.06106	1.02	1	1.05
131	HAR1B	0.7308	1.1	0.63	1.94
132	MYBPH	0.0407	1	1	1.01
133	PIWIL1	0.15238	1.15	0.95	1.39
134	CXCR2P1	0.28784	0.95	0.85	1.05
135	NGFR	0.53191	1.01	0.99	1.03
136	DGKK	0.22562	1.18	0.91	1.53
137	LINC00948	0.43879	1.1	0.87	1.39
138	CHIA	0.27456	0.6	0.24	1.51
139	CXCL6	0.33173	1.01	0.99	1.02
140	FCER2	0.27653	0.97	0.93	1.02
141	LGALS7B	0.14913	1	1	1
142	KLK11	0.75995	1	0.99	1.02
143	SDR16C5	0.13514	1.01	1	1.03
144	RP1-272L16.1	0.03135	1.33	1.03	1.71
145	TTR	0.93	1	0.99	1.01
146	APCDD1L	0.01718	1.01	1	1.03
147	RP11-445P17.8	0.00095	1.19	1.07	1.33
148	FKSG48	0.21025	1.06	0.97	1.16
149	RPSAP52	0.00619	1.11	1.03	1.2
150	KRT1	0.31564	1	1	1
151	LAMC2	0.09647	1	1	1
152	TAC3	0.87936	1	1	1
153	QRFPR	0.25844	1.09	0.94	1.26
154	POU2AF1	0.18034	0.97	0.93	1.01
155	DSG3	0.02848	1	1	1
156	NTRK2	0.00317	1.05	1.02	1.08
157	SPRR2E	0.82449	1	1	1
158	KRT5	0.0038	1	1	1
159	CGB5	0.10017	1	1	1.01
160	LINC00605	0.62804	1.03	0.93	1.13
161	CARD17	0.35473	0.97	0.92	1.03
162	SELL	0.09466	1	0.99	1
163	CLEC4G	0.00374	1.05	1.02	1.08
164	AC010677.5	0.61569	0.98	0.92	1.05
165	WNT8B	0.50065	1.02	0.96	1.1
166	CASP5	0.30172	0.83	0.59	1.18
167	RP11-206M11.7	0.91616	1	1	1
168	RP11-546K22.1	0.43699	0.95	0.83	1.08
169	STAC2	2e-05	1.13	1.07	1.19
170	GCNT3	0.4696	0.99	0.96	1.02
171	KRT6A	0.09471	1	1	1
172	LGALS9C	0.87014	0.95	0.55	1.67
173	SLC6A4	0.2803	0.87	0.68	1.12
174	SFTA1P	0.68302	1.03	0.91	1.16
175	KRT83	0.34727	0.97	0.92	1.03
176	AC009784.3	0.0001	2.87	1.69	4.87
177	TRIM15	0.26282	0.87	0.68	1.11
178	BAALC	0.4837	1.01	0.99	1.02
179	KRT84	0.70899	0.99	0.92	1.06
180	KRT72	0.01515	1.05	1.01	1.09
181	HCG4	0.39411	0.94	0.81	1.09
182	LINC01305	0.01616	2.03	1.14	3.6
183	S100A2	0.58388	1	1	1
184	SERPINB4	0.18485	1	1	1.01
185	TFPI2	0.81903	1	1	1
186	RP11-818F20.5	0.07558	1.2	0.98	1.48
187	KLK14	0.10256	1.01	1	1.02
188	CES1P1	0.0674	1.06	1	1.14
189	ALDOB	0.02685	0.64	0.43	0.95
190	CLCA3P	0.82608	0.96	0.67	1.38
191	ZFP42	0.10848	1.03	0.99	1.06
192	AC003092.1	0.34346	0.8	0.5	1.27
193	SLC36A2	0.22582	0.45	0.12	1.63
194	MLIP	0.98277	1.02	0.25	4.19
195	RP11-416L21.2	0.18773	1.05	0.98	1.13
196	ACTL6B	0.15925	1.03	0.99	1.07
197	SPRR2C	0.52694	1	0.99	1.01
198	NTSR1	0.02436	1.02	1	1.04
199	HMGA2	0.35223	1.01	0.99	1.04
200	SPRR2D	0.64507	1	1	1
201	BRINP1	0.06984	0.72	0.51	1.03
202	PON3	0.34624	1.04	0.96	1.11
203	SPTA1	0.01688	1.68	1.1	2.56
204	ATOH1	0.08306	1.01	1	1.02
205	NKX2-5	0.29998	1.06	0.95	1.2
206	ALB	0.09034	0.98	0.95	1
207	PNLIPRP3	0.00184	1.19	1.07	1.32
208	TMPRSS11A	0.03167	1.02	1	1.04
209	C5orf38	0.65829	1.02	0.95	1.09
210	SERPINB3	0.00698	1	1	1
211	ADH7	0.27561	1	1	1.01
212	KRT14	0.20486	1	1	1
213	GTF2IRD2P1	0.77873	1.05	0.77	1.43
214	SERPINB13	0.11225	1.01	1	1.01
215	P2RY12	0.20829	0.78	0.52	1.15
216	NPHS1	0.38954	0.83	0.54	1.27
217	SLPI	0.36655	1	1	1
218	CTB-61M7.2	0.12178	1.09	0.98	1.21
219	IL17REL	0.51612	0.98	0.91	1.05
220	SLC22A31	0.30249	1.12	0.9	1.4
221	RP11-311F12.1	0.05445	1.16	1	1.36
222	RHCG	0.00869	1	1	1
223	SLC45A2	0.03405	0.41	0.18	0.93
224	RP6-91H8.3	0.62155	1.1	0.76	1.59
225	CTB-113P19.4	0.45686	1.01	0.99	1.02
226	MUC4	0.49022	1	0.99	1.02
227	CXCL5	0.11256	1.01	1	1.01
228	ATP6V0A4	0.11112	1.02	0.99	1.05
229	PRSS3P2	0.36554	1	0.99	1
230	LINC00460	0.38711	1.02	0.97	1.07
231	PVALB	0.95262	1	1	1
232	RP11-483L5.1	0.87285	1.01	0.85	1.21
233	RP11-84D1.1	0.05062	1.74	1	3.04
234	PLA2G4E	0.15789	1.02	0.99	1.04
235	SLC38A4	0.04619	0.98	0.96	1
236	GABRP	0.67594	1	1	1
237	S100A8	0.32085	1	1	1
238	RP11-69G7.1	0.90503	0.99	0.87	1.13
239	KHDC1L	0.85459	1.01	0.89	1.15
240	LLNLF-158E9.1	0.37701	0.73	0.36	1.47
241	CALN1	0.10347	1.59	0.91	2.79
242	RP4-694A7.2	0.15914	1.06	0.98	1.14
243	GRM6	0.73318	1.05	0.8	1.37
244	RP5-1185I7.1	0.01315	1.39	1.07	1.8
245	RP11-135A1.3	0.00022	1.32	1.14	1.53
246	CCNA1	0.00457	1.02	1.01	1.03
247	CTD-2263F21.1	0.12486	1.09	0.98	1.21
248	GPR123	0.96795	1.04	0.18	6
249	AICDA	0.40127	0.88	0.66	1.18
250	PI16	0.65507	1	0.99	1.02
251	CR2	0.37754	0.99	0.98	1.01
252	GBP6	0.07473	1.01	1	1.02
253	KRT24	0.00892	1	1	1
254	CXCL10	0.02473	1	1	1
255	RP11-467L13.5	0.0023	1.03	1.01	1.04
256	AKR1B10	0.02143	1	1	1
257	PNLDC1	0.65281	0.98	0.91	1.06
258	MS4A1	0.29512	0.99	0.97	1.01
259	SAA2	0.47832	0.99	0.98	1.01
260	RP11-259O2.1	0.15261	1.15	0.95	1.38
261	DLGAP1	0.48017	0.9	0.68	1.2
262	AC108142.1	0.00177	1.81	1.25	2.62
263	VSNL1	0.57913	1.01	0.98	1.03
264	RAD1P2	0.20064	0.54	0.21	1.38
265	RP11-281P11.1	0.73413	1.08	0.69	1.71
266	AC093063.2	0.21195	0.76	0.49	1.17
267	IGFN1	0.63638	0.96	0.8	1.15
268	GBX1	0.49398	0.92	0.72	1.17
269	CTC-558O2.1	0.11987	0.27	0.05	1.4
270	NTNG1	0.00602	1.34	1.09	1.65
271	A1CF	0.17927	0.57	0.25	1.29
272	APOA2	0.61143	1	1	1
273	PDZD3	0.06288	0.86	0.74	1.01
274	DAPL1	0.75879	1	0.99	1.01
275	SOSTDC1	1e-05	1.03	1.02	1.04
276	BARX1	0.1634	1.01	1	1.02
277	LCE3D	0.81085	1	1	1.01
278	MIR137HG	0.07908	1.78	0.94	3.37
279	CTD-2104P17.1	0.0177	1.24	1.04	1.48
280	CYP4F2	0.1323	0.88	0.75	1.04
281	AC006262.4	0.71634	0.99	0.92	1.06
282	MAB21L2	0.5655	0.85	0.49	1.47
283	SPRR1B	0.39131	1	1	1
284	LCE3E	0.63076	1	0.99	1.01
285	LGALS9B	0.01342	1.4	1.07	1.82
286	KRTDAP	0.00082	1	1	1
287	RP11-598F7.4	0.24822	0.98	0.94	1.02
288	PAGE5	0.24306	0.98	0.94	1.02
289	RP11-337N6.1	0.54572	1.08	0.84	1.39
290	ZNF350-AS1	0.76673	1	1	1
291	CYP2B7P	0.62106	0.98	0.89	1.07
292	HKDC1	0.77807	0.99	0.93	1.06
293	CLDN6	0.00146	1.01	1	1.01
294	RP11-21L23.4	0.41459	1.05	0.93	1.2
295	RP11-677M24.1	0.02346	1.11	1.01	1.22
296	PRMT8	0.13743	4.61	0.61	34.63
297	GHRH	0.92826	1	1	1
298	SERPINB7	0.00971	1.01	1	1.02
299	BRINP3	0	1.14	1.08	1.2
300	HRK	0.26343	1.26	0.84	1.88
301	ITLN2	0.14612	1.02	0.99	1.04
302	LINC00707	0.93291	1	0.93	1.07
303	RP11-603B24.1	0.82932	0.99	0.91	1.07
304	MEI4	0.94484	1.04	0.35	3.11
305	RP11-60A14.1	0.70843	1.16	0.53	2.54
306	SPRR2G	0.61225	1	1	1
307	SNAP91	0.11939	0.86	0.71	1.04
308	PPP4R4	0.79476	0.97	0.78	1.21
309	RP11-509A17.3	0.74521	1.19	0.42	3.37
310	SAA2-SAA4	0.92521	1	0.98	1.03
311	CGB	0.0003	1.03	1.01	1.04
312	CTD-2531D15.4	0.35464	1.12	0.88	1.43
313	DPPA2	0.95811	1	0.92	1.09
314	SERPINA3	0.24912	1.39	0.8	2.42
315	RP11-11N5.1	0.5053	0.98	0.93	1.04
316	LINGO2	0.00756	1.2	1.05	1.38
317	DAB1	0.0415	0.92	0.85	1
318	FABP4	0.46046	1	1	1
319	MMP3	0.07501	1	1	1
320	LINC00163	0.9263	1.02	0.65	1.6
321	CGB8	0.06681	1.01	1	1.02
322	SPRR2F	0.51934	1	0.99	1.01
323	DEFB4A	0.60379	0.99	0.97	1.02
324	SPIC	0.47469	1.02	0.96	1.08
325	CA4	0.33156	0.99	0.96	1.01
326	GBA3	0.58891	1.02	0.96	1.08
327	AGXT	0.01224	0.1	0.02	0.6
328	TSPYL6	8e-05	3.86	1.97	7.53
329	KRT16P2	0.00195	1.03	1.01	1.05
330	C11orf87	0.00841	1.1	1.02	1.18
331	SLC7A13	0.14115	0.2	0.02	1.72
332	LGALS17A	0.05962	0.8	0.64	1.01
333	RP11-544M22.1	0.20173	1.23	0.89	1.69
334	ASCL1	0.7406	1	1	1.01
335	TRIML2	0.43415	0.95	0.82	1.09
336	MUC13	0.38639	0.98	0.95	1.02
337	KRT16P1	0.00029	1.53	1.22	1.93
338	CACNG6	0.90657	0.99	0.86	1.15
339	LMO1	0.02114	1.09	1.01	1.18
340	SFTPB	0.64657	1	0.99	1.01
341	LINC01287	0.46195	0.98	0.94	1.03
342	G6PC	0.03259	0.05	0	0.78
343	GPR149	0.55521	0.91	0.66	1.25
344	FGF5	0.5251	0.95	0.8	1.12
345	SSX1	0.35641	1.01	0.99	1.02
346	LINC00563	0.20009	0.07	0	4.13
347	AMTN	0.98679	1	0.98	1.02
348	HSPB3	0.06786	1.05	1	1.11
349	TRIM10	0.33489	0.42	0.07	2.42
350	ZNF676	0.57533	0.96	0.83	1.11
351	PENK	0.02966	1.15	1.01	1.3
352	RP11-661D19.1	0.68292	0.94	0.7	1.27
353	AC010091.1	0.25096	1.38	0.8	2.39
354	CTB-105N12.2	0.19652	2.52	0.62	10.22
355	HEPHL1	0.88248	1	0.97	1.03
356	IGHD	0.39018	1	0.99	1
357	TINAG	0.49143	0.48	0.06	3.91
358	CYMP	0.06653	1.82	0.96	3.47
359	SOST	0.00582	1.01	1	1.01
360	RP11-439A17.10	0.86787	0.95	0.51	1.76
361	AADACP1	0.46331	1.03	0.95	1.13
362	KRT31	0.45173	1	1	1.01
363	FCRL4	0.09227	0.1	0.01	1.47
364	GATA4	0.88235	0.99	0.81	1.2
365	FOXI2	0.76928	0.95	0.67	1.35
366	BCAR4	0.07316	1.03	1	1.07
367	TUBA3C	0.21095	1.01	0.99	1.03
368	RP11-662I13.2	0.75706	1.03	0.87	1.21
369	RP11-227H15.4	0.04602	1.11	1	1.24
370	T	0.92749	1.04	0.43	2.54
371	VCX3A	0.61685	1.01	0.98	1.04
372	LINC01314	0.32665	0.96	0.89	1.04
373	RP11-150O12.5	0.54758	1.03	0.93	1.14
374	ERVH48-1	0.62847	1	0.99	1.01
375	WFDC12	0.93554	1	0.98	1.03
376	MLNR	0.67645	0.66	0.1	4.59
377	LINC00524	0.59917	0.95	0.77	1.16
378	CHRNA9	0.52498	1.02	0.96	1.09
379	AC139099.4	0.05684	2.5	0.97	6.44
380	RP11-630D6.5	0.76766	0.72	0.08	6.58
381	BEST3	0.01912	1.12	1.02	1.23
382	LCE1E	0.22656	0.86	0.67	1.1
383	GABRR3	0.51106	0.72	0.27	1.91
384	VIT	0.40006	1.06	0.93	1.2
385	RIMS4	0.87549	0.99	0.88	1.12
386	DSC3	0.00498	1	1	1.01
387	FAM41C	0.91525	1.06	0.36	3.14
388	RP11-221J22.2	0.19533	0.04	0	5.41
389	CIDEC	0.00487	1.08	1.02	1.14
390	CTC-499J9.1	0.11559	1.07	0.98	1.17
391	SPRR2B	0.9326	1	0.99	1.01
392	HAVCR1	0.87205	1	0.99	1.01
393	RP11-316N24.2	0.8192	0.98	0.8	1.19
394	FGF20	0.20424	1.01	0.99	1.04
395	CLDN24	0.25225	1.6	0.72	3.56
396	AADACL2-AS1	0.39289	0.86	0.61	1.21
397	RP4-737E23.7	0.65105	1.06	0.82	1.37
398	KRT16P3	0.51475	1.12	0.8	1.57
399	KLK9	0.96863	1	0.88	1.14
400	IGHV2-70	0.49026	1	0.99	1
401	FOXC2-AS1	8e-05	1.29	1.14	1.47
402	LINC01230	0.05795	12.45	0.92	168.67
403	RP11-70F11.2	0.85585	0.95	0.52	1.73
404	MLIP-IT1	0.82627	1.11	0.45	2.71
405	MAGEB2	0.53128	0.99	0.98	1.01
406	RP11-736N17.8	0.0781	0.57	0.3	1.07
407	RP11-266O8.1	0.58702	0.29	0	24.19
408	FCAMR	0.39606	0.96	0.86	1.06
409	GAD2	0.33615	1.15	0.86	1.54
410	LINC00536	0.00082	1.33	1.12	1.57
411	FREM2	0.70542	0.99	0.94	1.05
412	AC006262.11	0.04756	1.05	1	1.11
413	PRSS57	0.32574	1.29	0.78	2.13
414	RP11-1220K2.2	0.42636	0.93	0.77	1.12
415	DLGAP1-AS3	0.12261	0.87	0.73	1.04
416	LGALS7	0.17249	1.01	1	1.01
417	RP1-35C21.1	0.46576	0.94	0.78	1.12
418	CTD-2066L21.3	0.36909	1.05	0.94	1.18
419	IL20RB-AS1	0.05955	1.57	0.98	2.5
420	RPL31P50	0.00696	0.41	0.21	0.78
421	TMPRSS11F	0.94604	1	0.88	1.15
422	FLJ43879	0.06958	1.27	0.98	1.64
423	RP11-438B23.2	0.08186	1.43	0.96	2.14
424	WIF1	0.11486	1	1	1.01
425	AC008268.2	0.94604	1.01	0.73	1.4
426	CYP1A1	0.94162	1	1	1
427	DAW1	0.30991	1.13	0.89	1.43
428	RP11-923I11.5	0.02636	0.58	0.36	0.94
429	RP11-44K6.2	0.1762	0.97	0.92	1.01
430	MIR8071-2	0.17192	0.99	0.97	1.01
431	PRSS1	0.31686	1	0.99	1
432	LINC00392	0.99315	1	0.99	1.02
433	CTCFL	0.43841	1.05	0.93	1.19
434	RP11-366L20.3	0.01978	1.36	1.05	1.77
435	TUBA3E	0.64584	0.99	0.93	1.04
436	GRAMD4P2	0.36252	0.72	0.35	1.47
437	SERPINA7	0.08037	1.18	0.98	1.43
438	FAM167A-AS1	0.88731	0.96	0.57	1.62
439	RP11-470L19.2	0.15196	5.04	0.55	46.1
440	F13B	0.03333	0	0	0.35
441	IRS4	0.4685	0.95	0.84	1.08
442	UGT2B10	0.18203	0.07	0	3.5
443	RP11-203B7.2	0.41061	0.64	0.22	1.86
444	LINC01541	0.74995	0.99	0.94	1.05
445	RP11-177F15.1	0.8207	1.11	0.44	2.78
446	AC055733.1	0.64367	1.11	0.71	1.75
447	SCGB2A1	0.12079	1.02	1	1.04
448	BRDT	0.14419	1.11	0.96	1.28
449	RP11-22H5.2	0.29926	2.44	0.45	13.15
450	PIWIL3	0.02575	1.19	1.02	1.38
451	TLX1	0.78171	1.01	0.93	1.09
452	AL122127.2	0.29184	0.99	0.98	1.01
453	LIN28A	0.00395	1.03	1.01	1.05
454	RP11-366H4.1	0.34874	1.06	0.94	1.18
455	RP11-94M14.2	0.00375	3.34	1.48	7.54
456	RP11-345I18.1	0.20957	1.06	0.97	1.17
457	DCX	0.28733	1.1	0.92	1.32
458	RP11-91J3.3	0.16061	0.76	0.51	1.12
459	RP11-561N12.2	0.76221	0.94	0.61	1.43
460	SLC6A15	0.61664	1.04	0.9	1.19
461	RP11-330A16.1	0.62454	0.93	0.7	1.24
462	KLK6	0.36122	1	1	1
463	IL36A	0.10798	1.08	0.98	1.19
464	DLK1	0.14629	1	1	1
465	OLFM4	0.69223	1	1	1
466	VN2R19P	0.01494	1.13	1.02	1.25
467	GUCA2A	0.48915	1	1	1.01
468	RP11-122C5.3	0.44973	1.48	0.54	4.09
469	KRT16P6	0.7287	1	1	1.01
470	RP11-805L22.3	0.44945	0.81	0.47	1.4
471	LINC00165	0.97843	1	0.92	1.09
472	KRT16P5	0.18992	1.07	0.97	1.18
473	LINC00403	0.59623	0.94	0.76	1.17
474	RP4-735C1.4	0.1489	0.97	0.94	1.01
475	CDH18	0.95123	1	0.86	1.17
476	CRNN	0.0001	1.02	1.01	1.03
477	GSTA9P	0.79659	1.01	0.94	1.08
478	ARHGAP36	0.01893	1.07	1.01	1.14
479	RP11-490G2.2	0.00784	33.95	2.53	456.38
480	RP11-95M15.1	0.98111	1	0.83	1.22
481	CTD-2066L21.1	0.22995	1.35	0.83	2.22
482	PRSS3P1	0.67249	0.96	0.81	1.14
483	RP11-527L4.2	0.29881	0.72	0.39	1.34
484	PRDM13	0.00014	2.1	1.43	3.07
485	RP11-451F20.1	0.10455	0.38	0.12	1.22
486	TLR8-AS1	0.1977	1.18	0.92	1.5
487	CTD-2066L21.2	0.17922	1.09	0.96	1.23
488	RP11-202G18.1	0.18943	0.56	0.23	1.33
489	CTD-2332E11.2	0.04313	0.89	0.79	1
490	RP11-311F12.2	0.83171	0.99	0.93	1.06
491	AC007163.2	0.00721	1.11	1.03	1.2
492	AL121578.2	0.98835	1	0.63	1.59
493	RP11-286B14.2	0.23676	1.18	0.9	1.54
494	POU6F2-AS1	0.18613	0.87	0.7	1.07
495	SERPINA9	0.38114	0.94	0.81	1.08
496	CTD-2128A3.2	0.59573	1.33	0.46	3.87
497	KCNU1	0.39706	1.1	0.88	1.37
498	RP11-88I21.1	0.82801	1.01	0.94	1.09
499	DDX43P3	0.57616	1.1	0.78	1.55
500	LRRC37A12P	0.93962	0.99	0.75	1.31
501	RP11-472K17.3	0.5027	0.97	0.9	1.05
502	SST	0.38496	1	0.99	1
503	LINC01179	0.14788	1.51	0.86	2.63
504	RP11-260N14.1	0.4525	1.65	0.45	6.12
505	MIR8071-1	0.5399	0.99	0.97	1.02
506	SULT2A1	0.43639	1	0.98	1.01
507	CTB-11I22.1	0.00659	4.67	1.54	14.19
508	CTC-353G13.1	0.23414	1.25	0.87	1.79
509	CTD-2008P7.8	0.85275	1.01	0.95	1.06
510	CYP2B6	0.24813	0.96	0.89	1.03
511	CACNG7	0.52076	0.84	0.49	1.43
512	LYZL6	0.66153	0.87	0.46	1.63
513	UGT2A3	0.19234	0.97	0.94	1.01
514	RP11-286B14.1	0.12397	38.39	0.37	4005.54
515	RP11-430H10.2	0.2655	2.18	0.55	8.63
516	RPL9P15	0.13179	0.46	0.17	1.26
517	AC024084.1	0.00038	1.63	1.25	2.14
518	ZNF729	0.86057	0.91	0.3	2.75
519	ZP4	0.02614	1.12	1.01	1.23
520	CITF22-49D8.1	0.02354	5.08	1.24	20.73
521	KRT38	0.56026	0.99	0.94	1.03
522	VAX1	0.03838	1.72	1.03	2.87
523	GKN1	0.92016	1	0.99	1.02
524	RNU6-140P	0.92332	1	0.97	1.03
525	NHP2P2	0.47782	0.88	0.61	1.26
526	RP11-20I20.1	0.22869	3.43	0.46	25.55
527	RP11-148O21.4	0.27456	0.79	0.51	1.21
528	MRPL20P1	0.40408	0.52	0.11	2.4
529	TMPRSS11BNL	0.03025	1.56	1.04	2.33
530	C17orf77	0.5438	0.54	0.08	3.87
531	RP11-789C1.2	0.09647	0.85	0.69	1.03
532	GHRHR	0.20753	0.58	0.25	1.35
533	RP11-382F24.1	0.51556	1.06	0.9	1.24
534	MAGEA4	0.73747	1	1	1.01
535	RP11-552C15.1	0.18491	1.31	0.88	1.94
536	AP003419.11	0.4076	1.46	0.59	3.6
537	DSCR10	0.0189	0.33	0.13	0.83
538	RP11-672A2.1	0.35025	1.16	0.85	1.6
539	HYALP1	0.56545	0.73	0.24	2.17
540	KLK12	0.90199	1	0.97	1.03
541	AC144835.1	0.4082	0.43	0.06	3.18
542	POU3F3	0.42171	0.95	0.84	1.07
543	RP11-114G11.4	0.27152	4.46	0.31	64.1
544	UGT2B4	0.01016	0.19	0.05	0.67
545	CTD-2292M14.1	0.87324	1.02	0.82	1.27
546	OTOP3	0.43252	1.06	0.92	1.22
547	RP11-111I12.1	0.07692	0.12	0.01	1.26
548	KLK3	0.6502	0.97	0.84	1.11
549	SLC17A4	0.28806	0.62	0.25	1.5
550	KCNQ5-IT1	0.82816	0.85	0.19	3.76
551	ZNF725P	0.46914	0.65	0.2	2.1
552	RP11-619L19.1	0.23513	1.26	0.86	1.83
553	PPY2	0.92509	1.01	0.9	1.12
554	LCE3A	0.6371	1.01	0.97	1.04
555	CCL15-CCL14	0.09781	0.7	0.45	1.07
556	FBXL21	0.16638	1.83	0.78	4.33
557	LINC00911	0.87312	0.93	0.39	2.25
558	ADIPOQ	0.05176	1.04	1	1.08
559	RP11-431J17.1	0.26804	0.7	0.37	1.32
560	CTC-261N6.1	0.25166	0.7	0.37	1.29
561	SRP72P1	0.42918	5.63	0.08	409.06
562	VN1R85P	0.5696	0.94	0.77	1.15
563	RNU6-831P	0.12617	0.78	0.57	1.07
564	LINC00973	0.36438	1.02	0.97	1.07
565	RP11-526F3.1	0.91604	0.99	0.83	1.18
566	AC087499.5	0.31048	0.72	0.39	1.35
567	RP11-218I7.2	0.34513	0.72	0.37	1.42
568	LINC00977	0.83476	1.29	0.12	13.58
569	RP11-142G1.1	0.14237	0.35	0.08	1.43
570	IGKV1OR2-9	0.89904	0.96	0.47	1.93
571	BPIFB2	0.84388	1.01	0.9	1.14
572	CSAG4	0.01055	0.69	0.52	0.92
573	AJ011931.1	0.00167	21.69	3.19	147.64
574	SSX5	0.48066	1.08	0.88	1.33
575	CDH12	0.6365	0.99	0.94	1.04
576	POU3F4	0.81036	0.82	0.17	4.01
577	CHIAP2	0.21136	0.21	0.02	2.42
578	SLC18A3	0.26521	1.01	0.99	1.02
579	RP11-676J15.1	0.92047	1.01	0.9	1.12
580	KNG1	0.01394	0.25	0.08	0.75
581	RP11-1020M18.10	0.54095	0.9	0.65	1.26
582	RP1-241P17.1	0.38187	0.94	0.82	1.08
583	AC011239.1	0.05723	0.22	0.05	1.05
584	RP1-117P20.3	0.29438	1.07	0.95	1.2
585	RP6-159A1.3	0.39983	1.16	0.82	1.65
586	AP000221.1	0.67342	1.41	0.28	7.07
587	TNPO1P3	0.26917	6.71	0.23	196.69
588	AGBL1	0.55134	6.18	0.02	2473.18
589	SLC17A1	0.51221	0.65	0.18	2.36
590	GUCY2EP	0.0993	1.33	0.95	1.86
591	IGLC5	0.29982	0.76	0.46	1.27
592	C12orf77	0.57504	0.76	0.3	1.96
