# Supplementary material
Source: Research Square preprint supplement (doi:10.21203/rs.3.rs-8947218/v1)
Supplement: Supplementary file 3 [file 1298e58d20d00774a1bc1b3a.xlsx]

## Sheet: Annotation
MyList	Gene ID	Type	Tax ID	Homologene Gene ID	Homologene Gene Tax ID	Gene Symbol	Description	Biological Process (GO)	Kinase Class (UniProt)	Protein Function (Protein Atlas)	Subcellular Location (Protein Atlas)	Drug (DrugBank)	Canonical Pathways	Hallmark Gene Sets	M5885 NABA MATRISOME ASSOCIATED	GO:0002250 adaptive immune response	GO:0006954 inflammatory response	GO:0009617 response to bacterium	R-HSA-6809371 Formation of the cornified env	GO:0001775 cell activation	GO:0050778 positive regulation of immune	R-HSA-198933 Immunoregulatory interactions	GO:0050865 regulation of cell activation	GO:0032103 positive regulation of respons	GO:0001819 positive regulation of cytokin	GO:0031347 regulation of defense response	R-HSA-375276 Peptide ligand-binding recepto	GO:0002697 regulation of immune effector	GO:0006959 humoral immune response	WP5218 Extrafollicular B cell activat	hsa04640 Hematopoietic cell lineage	GO:0098609 cell-cell adhesion	hsa04610 Complement and coagulation cas	M5880 NABA ECM AFFILIATED
RP11-443P15.2						None	None	None	None	None	None	None	None	None	nan	nan	nan	nan	nan	nan	nan	nan	nan	nan	nan	nan	nan	nan	nan	nan	nan	nan	nan	nan
SLC7A11	23657	symbol	H. sapiens	23657	H. sapiens	SLC7A11	solute carrier family 7 member 11	GO:1901494 regulation of cysteine metabolic process;GO:0031335 regulation of sulfur amino acid metabolic process;GO:1903786 regulation of glutathione biosynthetic process		FDA approved drug targets:Small molecule drugs; Transporters:Electrochemical Potential-driven transporters	Vesicles (Approved)	Cystine; Glutamic acid; Riluzole; Sulfasalazine; Acetylcysteine; Thimerosal		(M5924)HALLMARK MTORC1 SIGNALING; (M5939)HALLMARK P53 PATHWAY; (M5945)HALLMARK HEME METABOLISM	0.0	0.0	0.0	0.0	1.0	1.0	0.0	0.0	0.0	0.0	0.0	0.0	0.0	0.0	0.0	0.0	0.0	1.0	0.0	0.0
FAM50B	26240	symbol	H. sapiens	26240	H. sapiens	FAM50B	family with sequence similarity 50 member B	GO:0006325 chromatin organization;GO:0051276 chromosome organization;GO:0006996 organelle organization		Predicted intracellular proteins	Nucleoplasm (Enhanced); Additional: Cytokinetic bridge;Midbody				0.0	0.0	0.0	0.0	0.0	0.0	0.0	0.0	0.0	0.0	0.0	0.0	0.0	0.0	0.0	0.0	0.0	0.0	0.0	0.0
TNIP3	79931	symbol	H. sapiens	79931	H. sapiens	TNIP3	TNFAIP3 interacting protein 3	GO:0002756 MyD88-independent toll-like receptor signaling pathway;GO:0034142 toll-like receptor 4 signaling pathway;GO:0043124 negative regulation of I-kappaB kinase/NF-kappaB signaling		Predicted intracellular proteins					0.0	0.0	1.0	1.0	0.0	0.0	1.0	0.0	0.0	0.0	0.0	0.0	0.0	0.0	0.0	0.0	0.0	0.0	0.0	0.0
TMPRSS11D	9407	symbol	H. sapiens	9407	H. sapiens	TMPRSS11D	transmembrane serine protease 11D	GO:0007585 respiratory gaseous exchange by respiratory system;GO:0006508 proteolysis;GO:0019538 protein metabolic process		Peptidases:Serine-type peptidases; Predicted intracellular proteins; Enzymes					0.0	0.0	0.0	0.0	0.0	0.0	0.0	0.0	0.0	0.0	0.0	0.0	0.0	0.0	0.0	0.0	0.0	0.0	0.0	0.0
FGFBP2	83888	symbol	H. sapiens	83888	H. sapiens	FGFBP2	fibroblast growth factor binding protein 2	GO:0007267 cell-cell signaling;GO:0023052 signaling;GO:0007154 cell communication		Predicted secreted proteins			(M5883)NABA SECRETED FACTORS; (M5885)NABA MATRISOME ASSOCIATED; (M5889)NABA MATRISOME		1.0	0.0	0.0	0.0	0.0	0.0	0.0	0.0	0.0	0.0	0.0	0.0	0.0	0.0	0.0	0.0	0.0	0.0	0.0	0.0
RPL39L	116832	symbol	H. sapiens	116832	H. sapiens	RPL39L	ribosomal protein L39 like	GO:0006412 translation;GO:0043043 peptide biosynthetic process;GO:0043604 amide biosynthetic process		Ribosomal proteins; Predicted intracellular proteins				(M5951)HALLMARK SPERMATOGENESIS	0.0	0.0	0.0	0.0	0.0	0.0	0.0	0.0	0.0	0.0	0.0	0.0	0.0	0.0	0.0	0.0	0.0	0.0	0.0	0.0
RP1-27K12.2						None	None	None	None	None	None	None	None	None	nan	nan	nan	nan	nan	nan	nan	nan	nan	nan	nan	nan	nan	nan	nan	nan	nan	nan	nan	nan
CLDN10	9071	symbol	H. sapiens	9071	H. sapiens	CLDN10	claudin 10	GO:0016338 calcium-independent cell-cell adhesion via plasma membrane cell-adhesion molecules;GO:0070830 bicellular tight junction assembly;GO:0120192 tight junction assembly		Disease related genes; Predicted intracellular proteins; Human disease related genes:Skin diseases:Skin and soft tissue diseases					0.0	0.0	0.0	0.0	0.0	0.0	0.0	0.0	0.0	0.0	0.0	0.0	0.0	0.0	0.0	0.0	0.0	1.0	0.0	0.0
IL31RA	133396	symbol	H. sapiens	133396	H. sapiens	IL31RA	interleukin 31 receptor A	GO:0002438 acute inflammatory response to antigenic stimulus;GO:0030224 monocyte differentiation;GO:0043031 negative regulation of macrophage activation		Disease related genes; Predicted intracellular proteins; Human disease related genes:Skin diseases:Skin and soft tissue diseases	Vesicles (Approved); Additional: Nucleoplasm				0.0	0.0	1.0	0.0	1.0	1.0	0.0	0.0	1.0	0.0	0.0	0.0	0.0	0.0	0.0	0.0	0.0	0.0	0.0	0.0
CES1	1066	symbol	H. sapiens	1066	H. sapiens	CES1	carboxylesterase 1	GO:0090122 cholesterol ester hydrolysis involved in cholesterol transport;GO:0090119 vesicle-mediated cholesterol transport;GO:0120188 regulation of bile acid secretion		Predicted intracellular proteins; Enzymes; ENZYME proteins:Hydrolases	Endoplasmic reticulum (Supported)	Tacrine; Meperidine; Levocarnitine; Dextropropoxyphene; Cocaine; Naloxone; Diamorphine; Probucol; Hydroxy-Phenyl-Acetic Acid 8-Methyl-8-Aza-Bicyclo[3.2.1]Oct-3-Yl Ester; Cholic Acid; 4-Piperidino-Piperidine; N-acetyl-alpha-neuraminic acid; Thenoyltrifluoroacetone; Cyclandelate; Avasimibe; (1R)-1,2,2-trimethylpropyl (R)-methylphosphinate; (1S,7S,8S,8AR)-1,2,3,7,8,8A-HEXAHYDRO-7-METHYL-8-[2-[(2R,4R…	(M13096)SA PROGRAMMED CELL DEATH; (M40)PID E2F PATHWAY	(M5934)HALLMARK XENOBIOTIC METABOLISM	0.0	0.0	0.0	1.0	1.0	0.0	0.0	0.0	0.0	0.0	0.0	0.0	0.0	0.0	0.0	0.0	0.0	0.0	0.0	0.0
LSP1	4046	symbol	H. sapiens	4046	H. sapiens	LSP1	lymphocyte specific protein 1	GO:0098760 response to interleukin-7;GO:0098761 cellular response to interleukin-7;GO:0006968 cellular defense response		Predicted intracellular proteins			(M199)PID P38 MK2 PATHWAY	(M5938)HALLMARK REACTIVE OXYGEN SPECIES PATHWAY; (M5909)HALLMARK MYOGENESIS	0.0	0.0	1.0	0.0	0.0	0.0	0.0	0.0	0.0	0.0	0.0	0.0	0.0	0.0	0.0	0.0	0.0	0.0	0.0	0.0
PI3	5266	symbol	H. sapiens	5266	H. sapiens	PI3	peptidase inhibitor 3	GO:0007620 copulation;GO:0007617 mating behavior;GO:0018149 peptide cross-linking		Predicted secreted proteins	Plasma membrane (Approved)		(M3468)NABA ECM REGULATORS; (M5885)NABA MATRISOME ASSOCIATED; (M5889)NABA MATRISOME		1.0	0.0	0.0	1.0	1.0	0.0	0.0	0.0	0.0	0.0	0.0	0.0	0.0	0.0	1.0	0.0	0.0	0.0	0.0	0.0
LINC00942	100292680	symbol	H. sapiens	100292680	H. sapiens	LINC00942	long intergenic non-protein coding RNA 942								0.0	0.0	0.0	0.0	0.0	0.0	0.0	0.0	0.0	0.0	0.0	0.0	0.0	0.0	0.0	0.0	0.0	0.0	0.0	0.0
RUNX3	864	symbol	H. sapiens	864	H. sapiens	RUNX3	RUNX family transcription factor 3	GO:0043378 positive regulation of CD8-positive, alpha-beta T cell differentiation;GO:0043376 regulation of CD8-positive, alpha-beta T cell differentiation;GO:2001187 positive regulation of CD8-positive, alpha-beta T cell activation		Transcription factors:Immunoglobulin fold; Predicted intracellular proteins	Nucleoplasm;Vesicles (Supported); Additional: Cytosol		(M2)PID SMAD2 3NUCLEAR PATHWAY		0.0	0.0	0.0	0.0	0.0	1.0	0.0	0.0	1.0	0.0	0.0	0.0	0.0	0.0	0.0	0.0	0.0	0.0	0.0	0.0
BNC1	646	symbol	H. sapiens	646	H. sapiens	BNC1	basonuclin 1	GO:1900195 positive regulation of oocyte maturation;GO:1900193 regulation of oocyte maturation;GO:1903431 positive regulation of cell maturation		Disease related genes; Transcription factors:Zinc-coordinating DNA-binding domains; Predicted intracellular proteins	Nucleoplasm (Enhanced)				0.0	0.0	0.0	0.0	1.0	0.0	0.0	0.0	0.0	0.0	0.0	0.0	0.0	0.0	0.0	0.0	0.0	0.0	0.0	0.0
NFE4	58160	symbol	H. sapiens	58160	H. sapiens	NFE4	nuclear factor, erythroid 4	GO:0045944 positive regulation of transcription by RNA polymerase II;GO:0065003 protein-containing complex assembly;GO:0043933 protein-containing complex organization							0.0	0.0	0.0	0.0	0.0	0.0	0.0	0.0	0.0	0.0	0.0	0.0	0.0	0.0	0.0	0.0	0.0	0.0	0.0	0.0
CD70	970	symbol	H. sapiens	970	H. sapiens	CD70	CD70 molecule	GO:0002456 T cell mediated immunity;GO:0042100 B cell proliferation;GO:0033209 tumor necrosis factor-mediated signaling pathway		Cancer-related genes:Mutated cancer genes; Disease related genes; CD markers; Predicted intracellular proteins; Cancer-related genes:Candidate cancer biomarkers	Nucleoplasm (Uncertain)			(M5932)HALLMARK INFLAMMATORY RESPONSE	0.0	1.0	1.0	0.0	0.0	1.0	0.0	0.0	1.0	0.0	0.0	0.0	0.0	0.0	0.0	0.0	0.0	0.0	1.0	0.0
OSGIN1	29948	symbol	H. sapiens	29948	H. sapiens	OSGIN1	oxidative stress induced growth inhibitor 1	GO:0030308 negative regulation of cell growth;GO:0045926 negative regulation of growth;GO:0001558 regulation of cell growth		Predicted intracellular proteins	Cytosol;Nucleoplasm (Approved)			(M5939)HALLMARK P53 PATHWAY	0.0	0.0	0.0	0.0	0.0	0.0	0.0	0.0	0.0	0.0	0.0	0.0	0.0	0.0	0.0	0.0	0.0	0.0	0.0	0.0
IFI27L2	83982	symbol	H. sapiens	83982	H. sapiens	IFI27L2	interferon alpha inducible protein 27 like 2	GO:0097190 apoptotic signaling pathway;GO:0006915 apoptotic process;GO:0012501 programmed cell death		Predicted intracellular proteins	Cytosol (Approved); Additional: Nucleoli				0.0	0.0	0.0	0.0	0.0	0.0	0.0	0.0	0.0	0.0	0.0	0.0	0.0	0.0	0.0	0.0	0.0	0.0	0.0	0.0
KCNQ5	56479	symbol	H. sapiens	56479	H. sapiens	KCNQ5	potassium voltage-gated channel subfamily Q member 5	GO:0071805 potassium ion transmembrane transport;GO:0006813 potassium ion transport;GO:0034765 regulation of ion transmembrane transport		Disease related genes; Voltage-gated ion channels:Voltage-Gated Potassium Channels; Potential drug targets; Predicted intracellular proteins; Human disease related genes:Other diseases:Mental and behavioural disorders	Vesicles (Approved)	Gabapentin; Ezogabine; ICA-105665			0.0	0.0	0.0	0.0	0.0	0.0	0.0	0.0	0.0	0.0	0.0	0.0	0.0	0.0	0.0	0.0	0.0	0.0	0.0	0.0
PTPRZ1	5803	symbol	H. sapiens	5803	H. sapiens	PTPRZ1	protein tyrosine phosphatase receptor type Z1	GO:0070445 regulation of oligodendrocyte progenitor proliferation;GO:0048714 positive regulation of oligodendrocyte differentiation;GO:0048713 regulation of oligodendrocyte differentiation		Predicted secreted proteins; Enzymes; ENZYME proteins:Hydrolases	Cytosol (Approved); Additional: Vesicles				0.0	0.0	1.0	0.0	0.0	1.0	0.0	0.0	0.0	0.0	0.0	0.0	0.0	0.0	0.0	0.0	0.0	0.0	0.0	0.0
ARSJ	79642	symbol	H. sapiens	79642	H. sapiens	ARSJ	arylsulfatase family member J			Predicted intracellular proteins; Predicted secreted proteins	Actin filaments (Enhanced)				0.0	0.0	0.0	0.0	0.0	0.0	0.0	0.0	0.0	0.0	0.0	0.0	0.0	0.0	0.0	0.0	0.0	0.0	0.0	0.0
IL13RA2	3598	symbol	H. sapiens	3598	H. sapiens	IL13RA2	interleukin 13 receptor subunit alpha 2	GO:0043305 negative regulation of mast cell degranulation;GO:0033007 negative regulation of mast cell activation involved in immune response;GO:0002638 negative regulation of immunoglobulin production		Cancer-related genes:Candidate cancer biomarkers; CD markers	Cell Junctions;Plasma membrane (Approved); Additional: Nucleoplasm;Vesicles	AER001	(M28)PID IL4 2PATHWAY	(M5951)HALLMARK SPERMATOGENESIS	0.0	1.0	1.0	0.0	0.0	1.0	0.0	0.0	1.0	0.0	0.0	0.0	0.0	1.0	0.0	0.0	0.0	0.0	1.0	0.0
SLC47A2	146802	symbol	H. sapiens	146802	H. sapiens	SLC47A2	solute carrier family 47 member 2	GO:1990961 xenobiotic detoxification by transmembrane export across the plasma membrane;GO:0046618 xenobiotic export from cell;GO:0042908 xenobiotic transport		Transporters:Electrochemical Potential-driven transporters					0.0	0.0	0.0	0.0	0.0	0.0	0.0	0.0	0.0	0.0	0.0	0.0	0.0	0.0	0.0	0.0	0.0	0.0	0.0	0.0
MEFV	4210	symbol	H. sapiens	4210	H. sapiens	MEFV	MEFV innate immuity regulator, pyrin	GO:1904270 pyroptosome complex assembly;GO:0071641 negative regulation of macrophage inflammatory protein 1 alpha production;GO:0071640 regulation of macrophage inflammatory protein 1 alpha production		Disease related genes; Human disease related genes:Immune system diseases:Other immune system diseases; Predicted intracellular proteins; Human disease related genes:Immune system diseases:Allergies and autoimmune diseases	Nucleoplasm (Supported); Additional: Cytosol			(M5932)HALLMARK INFLAMMATORY RESPONSE; (M5956)HALLMARK KRAS SIGNALING DN	0.0	0.0	1.0	0.0	0.0	0.0	1.0	0.0	0.0	0.0	1.0	1.0	0.0	0.0	0.0	0.0	0.0	0.0	0.0	0.0
LRRC38	126755	symbol	H. sapiens	126755	H. sapiens	LRRC38	leucine rich repeat containing 38	GO:1903818 positive regulation of voltage-gated potassium channel activity;GO:1901018 positive regulation of potassium ion transmembrane transporter activity;GO:1901381 positive regulation of potassium ion transmembrane transport							0.0	0.0	0.0	0.0	0.0	0.0	0.0	0.0	0.0	0.0	0.0	0.0	0.0	0.0	0.0	0.0	0.0	0.0	0.0	0.0
ITLN1	55600	symbol	H. sapiens	55600	H. sapiens	ITLN1	intelectin 1	GO:0009624 response to nematode;GO:0070207 protein homotrimerization;GO:0070206 protein trimerization		Predicted secreted proteins			(M5880)NABA ECM AFFILIATED; (M5885)NABA MATRISOME ASSOCIATED; (M5889)NABA MATRISOME		1.0	0.0	0.0	0.0	0.0	0.0	0.0	0.0	0.0	0.0	0.0	0.0	0.0	0.0	0.0	0.0	0.0	0.0	0.0	1.0
KRT6B	3854	symbol	H. sapiens	3854	H. sapiens	KRT6B	keratin 6B	GO:0007398 ectoderm development;GO:0045109 intermediate filament organization;GO:0031424 keratinization		Disease related genes; Human disease related genes:Congenital malformations:Congenital malformations of skin; Predicted intracellular proteins	Intermediate filaments (Approved)				0.0	0.0	0.0	0.0	1.0	0.0	0.0	0.0	0.0	0.0	0.0	0.0	0.0	0.0	0.0	0.0	0.0	0.0	0.0	0.0
BAAT	570	symbol	H. sapiens	570	H. sapiens	BAAT	bile acid-CoA:amino acid N-acyltransferase	GO:0002152 bile acid conjugation;GO:0019530 taurine metabolic process;GO:0019694 alkanesulfonate metabolic process		Human disease related genes:Congenital disorders of metabolism:Congenital disorders of ion transport and metabolism; Predicted intracellular proteins; ENZYME proteins:Hydrolases; ENZYME proteins:Transferases; Disease related genes; Potential drug targets; Enzymes	Vesicles (Uncertain)	Glycine			0.0	0.0	0.0	0.0	0.0	0.0	0.0	0.0	0.0	0.0	0.0	0.0	0.0	0.0	0.0	0.0	0.0	0.0	0.0	0.0
RP11-680F8.1						None	None	None	None	None	None	None	None	None	nan	nan	nan	nan	nan	nan	nan	nan	nan	nan	nan	nan	nan	nan	nan	nan	nan	nan	nan	nan
KLK13	26085	symbol	H. sapiens	26085	H. sapiens	KLK13	kallikrein related peptidase 13	GO:0016485 protein processing;GO:0051604 protein maturation;GO:0006508 proteolysis		Predicted secreted proteins; Peptidases:Serine-type peptidases; Enzymes; Cancer-related genes:Candidate cancer biomarkers					0.0	0.0	0.0	0.0	1.0	0.0	0.0	0.0	0.0	0.0	0.0	0.0	0.0	0.0	0.0	0.0	0.0	0.0	0.0	0.0
LRRC4	64101	symbol	H. sapiens	64101	H. sapiens	LRRC4	leucine rich repeat containing 4	GO:0097119 postsynaptic density protein 95 clustering;GO:1904861 excitatory synapse assembly;GO:0097106 postsynaptic density organization		Predicted intracellular proteins	Golgi apparatus (Approved)				0.0	0.0	0.0	0.0	0.0	0.0	0.0	0.0	0.0	0.0	0.0	0.0	0.0	0.0	0.0	0.0	0.0	1.0	0.0	0.0
CSF3	1440	symbol	H. sapiens	1440	H. sapiens	CSF3	colony stimulating factor 3	GO:2000251 positive regulation of actin cytoskeleton reorganization;GO:0030851 granulocyte differentiation;GO:2000249 regulation of actin cytoskeleton reorganization		Predicted secreted proteins; Cancer-related genes:Candidate cancer biomarkers			(M5883)NABA SECRETED FACTORS; (M5885)NABA MATRISOME ASSOCIATED; (M5889)NABA MATRISOME	(M5932)HALLMARK INFLAMMATORY RESPONSE	1.0	0.0	1.0	1.0	0.0	1.0	0.0	0.0	1.0	0.0	0.0	0.0	0.0	0.0	0.0	0.0	1.0	0.0	0.0	0.0
DNASE1L3	1776	symbol	H. sapiens	1776	H. sapiens	DNASE1L3	deoxyribonuclease 1 like 3	GO:0070948 regulation of neutrophil mediated cytotoxicity;GO:0010623 programmed cell death involved in cell development;GO:0006309 apoptotic DNA fragmentation		Disease related genes; Predicted intracellular proteins; Predicted secreted proteins					0.0	0.0	0.0	0.0	0.0	1.0	0.0	0.0	0.0	1.0	0.0	1.0	0.0	1.0	0.0	0.0	0.0	0.0	0.0	0.0
S100A3	6274	symbol	H. sapiens	6274	H. sapiens	S100A3	S100 calcium binding protein A3			Predicted intracellular proteins	Cytosol (Enhanced); Additional: Golgi apparatus;Plasma membrane		(M5883)NABA SECRETED FACTORS; (M5885)NABA MATRISOME ASSOCIATED; (M5889)NABA MATRISOME		1.0	0.0	0.0	0.0	0.0	0.0	0.0	0.0	0.0	0.0	0.0	0.0	0.0	0.0	0.0	0.0	0.0	0.0	0.0	0.0
FOXC2	2303	symbol	H. sapiens	2303	H. sapiens	FOXC2	forkhead box C2	GO:1902257 negative regulation of apoptotic process involved in outflow tract morphogenesis;GO:0048342 paraxial mesodermal cell differentiation;GO:0048343 paraxial mesodermal cell fate commitment		Disease related genes; Transcription factors:Helix-turn-helix domains; Human disease related genes:Congenital malformations:Congenital malformations of skin; Predicted intracellular proteins	Nuclear bodies;Nucleoplasm (Supported)			(M5930)HALLMARK EPITHELIAL MESENCHYMAL TRANSITION	0.0	0.0	0.0	0.0	1.0	0.0	0.0	0.0	1.0	0.0	0.0	0.0	0.0	0.0	0.0	0.0	0.0	0.0	0.0	0.0
HSPD1P6	645548	symbol	H. sapiens	645548	H. sapiens	HSPD1P6	heat shock protein family D (Hsp60) member 1 pseudogene 6								0.0	0.0	0.0	0.0	0.0	0.0	0.0	0.0	0.0	0.0	0.0	0.0	0.0	0.0	0.0	0.0	0.0	0.0	0.0	0.0
FAM9C	171484	symbol	H. sapiens	171484	H. sapiens	FAM9C	family with sequence similarity 9 member C	GO:0007286 spermatid development;GO:0048515 spermatid differentiation;GO:0051321 meiotic cell cycle		Predicted intracellular proteins					0.0	0.0	0.0	0.0	0.0	0.0	0.0	0.0	0.0	0.0	0.0	0.0	0.0	0.0	0.0	0.0	0.0	0.0	0.0	0.0
KRT6C	286887	symbol	H. sapiens	286887	H. sapiens	KRT6C	keratin 6C	GO:0045109 intermediate filament organization;GO:0031424 keratinization;GO:0045104 intermediate filament cytoskeleton organization		Disease related genes; Human disease related genes:Congenital malformations:Congenital malformations of skin; Predicted intracellular proteins	Intermediate filaments (Approved)				0.0	0.0	0.0	0.0	1.0	0.0	0.0	0.0	0.0	0.0	0.0	0.0	0.0	0.0	0.0	0.0	0.0	0.0	0.0	0.0
IL36G	56300	symbol	H. sapiens	56300	H. sapiens	IL36G	interleukin 36 gamma	GO:0002437 inflammatory response to antigenic stimulus;GO:0071222 cellular response to lipopolysaccharide;GO:0071219 cellular response to molecule of bacterial origin		Predicted intracellular proteins; Predicted secreted proteins	Cytosol (Supported); Additional: Nucleoplasm;Plasma membrane		(M5883)NABA SECRETED FACTORS; (M5885)NABA MATRISOME ASSOCIATED; (M5889)NABA MATRISOME		1.0	0.0	1.0	1.0	0.0	0.0	0.0	0.0	0.0	0.0	0.0	0.0	0.0	0.0	0.0	0.0	0.0	0.0	0.0	0.0
GRM3	2913	symbol	H. sapiens	2913	H. sapiens	GRM3	glutamate metabotropic receptor 3	GO:0007196 adenylate cyclase-inhibiting G protein-coupled glutamate receptor signaling pathway;GO:0007216 G protein-coupled glutamate receptor signaling pathway;GO:0007194 negative regulation of adenylate cyclase activity		G-protein coupled receptors:GPCRs excl olfactory receptors; G-protein coupled receptors:Family 3 (C) receptors; Predicted intracellular proteins		LY2140023			0.0	0.0	0.0	0.0	0.0	0.0	0.0	0.0	0.0	0.0	0.0	0.0	1.0	0.0	0.0	0.0	0.0	0.0	0.0	0.0
C1orf110	339512	gene_synonym	H. sapiens	339512	H. sapiens	CCDC190	coiled-coil domain containing 190			Predicted intracellular proteins	Vesicles (Approved)				0.0	0.0	0.0	0.0	0.0	0.0	0.0	0.0	0.0	0.0	0.0	0.0	0.0	0.0	0.0	0.0	0.0	0.0	0.0	0.0
TMEM106A	113277	symbol	H. sapiens	113277	H. sapiens	TMEM106A	transmembrane protein 106A	GO:0035780 CD80 biosynthetic process;GO:0035781 CD86 biosynthetic process;GO:0045348 positive regulation of MHC class II biosynthetic process		Transporters					0.0	0.0	0.0	0.0	0.0	1.0	0.0	0.0	0.0	0.0	1.0	0.0	0.0	0.0	0.0	0.0	0.0	0.0	0.0	0.0
PIK3CD	5293	symbol	H. sapiens	5293	H. sapiens	PIK3CD	phosphatidylinositol-4,5-bisphosphate 3-kinase catalytic subunit delta	GO:0002551 mast cell chemotaxis;GO:0060374 mast cell differentiation;GO:0035747 natural killer cell chemotaxis	Atypical: PI3/PI4-kinase family	RAS pathway related proteins; Predicted intracellular proteins; ENZYME proteins:Transferases; Disease related genes; Kinases:Atypical kinases; Human disease related genes:Immune system diseases:Primary immunodeficiency; Enzymes; FDA approved drug targets:Small molecule drugs	Vesicles (Approved); Additional: Cytokinetic bridge	Caffeine; XL765; TG100-115; 2-((9H-PURIN-6-YLTHIO)METHYL)-5-CHLORO-3-(2-METHOXYPHENYL)QUINAZOLIN-4(3H)-ONE; Idelalisib; Duvelisib; Fostamatinib; Copanlisib	(M12771)SA PTEN PATHWAY; (M18895)SA TRKA RECEPTOR; (M1718)SIG IL4RECEPTOR IN B LYPHOCYTES	(M5942)HALLMARK UV RESPONSE DN	0.0	1.0	1.0	0.0	0.0	1.0	1.0	1.0	0.0	0.0	1.0	0.0	0.0	0.0	0.0	0.0	0.0	0.0	1.0	0.0
IRAK3	11213	symbol	H. sapiens	11213	H. sapiens	IRAK3	interleukin 1 receptor associated kinase 3	GO:0010932 regulation of macrophage tolerance induction;GO:0010933 positive regulation of macrophage tolerance induction;GO:0010936 negative regulation of macrophage cytokine production	TKL Ser/Thr protein kinase family	Predicted intracellular proteins; ENZYME proteins:Transferases; Disease related genes; Kinases:TKL Ser/Thr protein kinases; Potential drug targets; Enzymes	Vesicles (Approved)	Fostamatinib	(M110)PID IL1 PATHWAY		0.0	0.0	1.0	1.0	0.0	0.0	1.0	0.0	1.0	1.0	1.0	1.0	0.0	1.0	0.0	0.0	0.0	0.0	0.0	0.0
LINC00520	645687	symbol	H. sapiens	645687	H. sapiens	LINC00520	long intergenic non-protein coding RNA 520								0.0	0.0	0.0	0.0	0.0	0.0	0.0	0.0	0.0	0.0	0.0	0.0	0.0	0.0	0.0	0.0	0.0	0.0	0.0	0.0
SLC10A6	345274	symbol	H. sapiens	345274	H. sapiens	SLC10A6	solute carrier family 10 member 6	GO:0043251 sodium-dependent organic anion transport;GO:0015721 bile acid and bile salt transport;GO:0015718 monocarboxylic acid transport		Transporters:Electrochemical Potential-driven transporters					0.0	0.0	0.0	0.0	0.0	0.0	0.0	0.0	0.0	0.0	0.0	0.0	0.0	0.0	0.0	0.0	0.0	0.0	0.0	0.0
SPINK6	404203	symbol	H. sapiens	404203	H. sapiens	SPINK6	serine peptidase inhibitor Kazal type 6	GO:1900004 negative regulation of serine-type endopeptidase activity;GO:1902572 negative regulation of serine-type peptidase activity;GO:1900003 regulation of serine-type endopeptidase activity		Predicted secreted proteins		Leucine - Reduced Carbonyl			0.0	0.0	0.0	0.0	1.0	0.0	0.0	0.0	0.0	0.0	0.0	0.0	0.0	0.0	0.0	0.0	0.0	0.0	0.0	0.0
CLEC2B	9976	symbol	H. sapiens	9976	H. sapiens	CLEC2B	C-type lectin domain family 2 member B			Predicted intracellular proteins			(M5880)NABA ECM AFFILIATED; (M5885)NABA MATRISOME ASSOCIATED; (M5889)NABA MATRISOME		1.0	0.0	0.0	0.0	0.0	0.0	0.0	1.0	0.0	0.0	0.0	0.0	0.0	0.0	0.0	0.0	0.0	0.0	0.0	1.0
NRG1	3084	symbol	H. sapiens	3084	H. sapiens	NRG1	neuregulin 1	GO:0038135 ERBB2-ERBB4 signaling pathway;GO:0045213 neurotransmitter receptor metabolic process;GO:0021840 directional guidance of interneurons involved in migration from the subpallium to the cortex		Predicted secreted proteins; Disease related genes; Predicted intracellular proteins; Cancer-related genes:Candidate cancer biomarkers; Human disease related genes:Other diseases:Mental and behavioural disorders	Nucleoplasm (Approved)		(M201)PID ERBB NETWORK PATHWAY; (M33)PID GLYPICAN 1PATHWAY; (M13)PID ERBB4 PATHWAY		1.0	0.0	1.0	0.0	1.0	0.0	0.0	0.0	0.0	0.0	0.0	0.0	0.0	0.0	0.0	0.0	0.0	0.0	0.0	0.0
IDO1	3620	symbol	H. sapiens	3620	H. sapiens	IDO1	indoleamine 2,3-dioxygenase 1	GO:0036269 swimming behavior;GO:0034275 kynurenic acid metabolic process;GO:0034276 kynurenic acid biosynthetic process		ENZYME proteins:Oxidoreductases; Predicted intracellular proteins; Enzymes; Cancer-related genes:Candidate cancer biomarkers	Cytosol (Supported); Additional: Mitochondria;Nucleoplasm;Vesicles	Nitric Oxide; Cannabidiol; Medical Cannabis; Nabiximols		(M5913)HALLMARK INTERFERON GAMMA RESPONSE	0.0	0.0	1.0	1.0	0.0	0.0	1.0	0.0	1.0	1.0	1.0	1.0	0.0	0.0	0.0	0.0	0.0	0.0	0.0	0.0
GPC2	221914	symbol	H. sapiens	221914	H. sapiens	GPC2	glypican 2	GO:0007224 smoothened signaling pathway;GO:0010976 positive regulation of neuron projection development;GO:1905475 regulation of protein localization to membrane		Predicted intracellular proteins			(M5880)NABA ECM AFFILIATED; (M5885)NABA MATRISOME ASSOCIATED; (M5889)NABA MATRISOME		1.0	0.0	0.0	0.0	0.0	0.0	0.0	0.0	0.0	0.0	0.0	0.0	0.0	0.0	0.0	0.0	0.0	0.0	0.0	1.0
B4GALT6	9331	symbol	H. sapiens	9331	H. sapiens	B4GALT6	beta-1,4-galactosyltransferase 6	GO:0001572 lactosylceramide biosynthetic process;GO:0046478 lactosylceramide metabolic process;GO:0010706 ganglioside biosynthetic process via lactosylceramide		ENZYME proteins:Transferases; Predicted intracellular proteins; Enzymes					0.0	0.0	0.0	0.0	0.0	0.0	0.0	0.0	0.0	0.0	0.0	0.0	0.0	0.0	0.0	0.0	0.0	0.0	0.0	1.0
SOX7	83595	symbol	H. sapiens	83595	H. sapiens	SOX7	SRY-box transcription factor 7	GO:0001706 endoderm formation;GO:0007492 endoderm development;GO:0001704 formation of primary germ layer		Transcription factors:Other all-alpha-helical DNA-binding domains; Predicted intracellular proteins	Nuclear speckles (Approved); Additional: Golgi apparatus				0.0	0.0	0.0	0.0	0.0	0.0	0.0	0.0	1.0	0.0	0.0	0.0	0.0	0.0	0.0	0.0	0.0	0.0	0.0	0.0
FDCSP	260436	symbol	H. sapiens	260436	H. sapiens	FDCSP	follicular dendritic cell secreted protein			Predicted secreted proteins					0.0	0.0	0.0	0.0	0.0	0.0	0.0	0.0	0.0	0.0	0.0	0.0	0.0	0.0	0.0	0.0	0.0	0.0	0.0	0.0
TUBB6	84617	symbol	H. sapiens	84617	H. sapiens	TUBB6	tubulin beta 6 class V	GO:0000226 microtubule cytoskeleton organization;GO:0000278 mitotic cell cycle;GO:0007017 microtubule-based process		Disease related genes; Predicted intracellular proteins	Microtubules (Approved); Additional: Cytokinetic bridge;Mitotic spindle	CYT997; Artenimol			0.0	0.0	0.0	0.0	0.0	0.0	0.0	1.0	0.0	0.0	0.0	0.0	0.0	0.0	0.0	0.0	0.0	0.0	0.0	0.0
LINC01139	339535	symbol	H. sapiens	339535	H. sapiens	LINC01139	long intergenic non-protein coding RNA 1139								0.0	0.0	0.0	0.0	0.0	0.0	0.0	0.0	0.0	0.0	0.0	0.0	0.0	0.0	0.0	0.0	0.0	0.0	0.0	0.0
ABCA4	24	symbol	H. sapiens	24	H. sapiens	ABCA4	ATP binding cassette subfamily A member 4	GO:0006649 phospholipid transfer to membrane;GO:0034633 retinol transport;GO:0046864 isoprenoid transport		Human disease related genes:Nervous system diseases:Eye disease; Disease related genes; ENZYME proteins; Transporters:Primary Active Transporters; Potential drug targets; Enzymes	Cytosol (Approved)			(M5948)HALLMARK BILE ACID METABOLISM	0.0	0.0	0.0	0.0	0.0	0.0	0.0	0.0	0.0	0.0	0.0	0.0	0.0	0.0	0.0	0.0	0.0	0.0	0.0	0.0
IGFBP6	3489	symbol	H. sapiens	3489	H. sapiens	IGFBP6	insulin like growth factor binding protein 6	GO:0043567 regulation of insulin-like growth factor receptor signaling pathway;GO:0032874 positive regulation of stress-activated MAPK cascade;GO:0070304 positive regulation of stress-activated protein kinase signaling cascade		Predicted intracellular proteins; Predicted secreted proteins			(M3008)NABA ECM GLYCOPROTEINS; (M5884)NABA CORE MATRISOME; (M5889)NABA MATRISOME	(M5902)HALLMARK APOPTOSIS	0.0	0.0	0.0	0.0	0.0	0.0	0.0	0.0	1.0	0.0	0.0	0.0	0.0	0.0	0.0	0.0	0.0	0.0	0.0	0.0
SPIB	6689	symbol	H. sapiens	6689	H. sapiens	SPIB	Spi-B transcription factor	GO:0045944 positive regulation of transcription by RNA polymerase II;GO:0045893 positive regulation of transcription, DNA-templated;GO:1903508 positive regulation of nucleic acid-templated transcription		Transcription factors:Helix-turn-helix domains; Predicted intracellular proteins					0.0	0.0	0.0	0.0	0.0	0.0	0.0	0.0	0.0	0.0	0.0	0.0	0.0	0.0	0.0	0.0	0.0	0.0	0.0	0.0
MRGPRX3	117195	symbol	H. sapiens	117195	H. sapiens	MRGPRX3	MAS related GPR family member X3	GO:0007186 G protein-coupled receptor signaling pathway;GO:0007165 signal transduction;GO:0023052 signaling		G-protein coupled receptors:GPCRs excl olfactory receptors					0.0	0.0	0.0	0.0	0.0	0.0	0.0	0.0	0.0	0.0	0.0	0.0	0.0	0.0	0.0	0.0	0.0	0.0	0.0	0.0
PCSK9	255738	symbol	H. sapiens	255738	H. sapiens	PCSK9	proprotein convertase subtilisin/kexin type 9	GO:0032799 low-density lipoprotein receptor particle metabolic process;GO:0032802 low-density lipoprotein particle receptor catabolic process;GO:0032805 positive regulation of low-density lipoprotein particle receptor catabolic process		Peptidases:Serine-type peptidases; Predicted intracellular proteins; Predicted secreted proteins; Disease related genes; Human disease related genes:Cardiovascular diseases:Vascular diseases; Human disease related genes:Congenital disorders of metabolism:Congenital disorders of lipid/glycolipid metabolism; Enzymes; FDA approved drug targets:Biotech drugs		Alirocumab		(M5916)HALLMARK APICAL SURFACE; (M5921)HALLMARK COMPLEMENT	0.0	0.0	0.0	0.0	0.0	0.0	0.0	0.0	0.0	0.0	0.0	0.0	0.0	0.0	0.0	0.0	0.0	0.0	0.0	0.0
MT1L	4500	symbol	H. sapiens	4500	H. sapiens	MT1L	metallothionein 1L, pseudogene								0.0	0.0	0.0	0.0	0.0	0.0	0.0	0.0	0.0	0.0	0.0	0.0	0.0	0.0	0.0	0.0	0.0	0.0	0.0	0.0
IQCA1	79781	symbol	H. sapiens	79781	H. sapiens	IQCA1	IQ motif containing with AAA domain 1			Predicted intracellular proteins	Nucleoplasm (Uncertain)				0.0	0.0	0.0	0.0	0.0	0.0	0.0	0.0	0.0	0.0	0.0	0.0	0.0	0.0	0.0	0.0	0.0	0.0	0.0	0.0
RP11-557H15.3						None	None	None	None	None	None	None	None	None	nan	nan	nan	nan	nan	nan	nan	nan	nan	nan	nan	nan	nan	nan	nan	nan	nan	nan	nan	nan
CASP1P2	440067	symbol	H. sapiens	440067	H. sapiens	CASP1P2	caspase 1 pseudogene 2								0.0	0.0	0.0	0.0	0.0	0.0	0.0	0.0	0.0	0.0	0.0	0.0	0.0	0.0	0.0	0.0	0.0	0.0	0.0	0.0
SCGB1A1	7356	symbol	H. sapiens	7356	H. sapiens	SCGB1A1	secretoglobin family 1A member 1	GO:0034021 response to silicon dioxide;GO:0010193 response to ozone;GO:0032696 negative regulation of interleukin-13 production		Predicted intracellular proteins; Predicted secreted proteins; Cancer-related genes:Candidate cancer biomarkers		4,4'-BIS([H]METHYLSULFONYL)-2,2',5,5'-TETRACHLOROBIPHENYL	(M285)PID HNF3A PATHWAY	(M5949)HALLMARK PEROXISOME; (M5956)HALLMARK KRAS SIGNALING DN	0.0	0.0	0.0	1.0	0.0	0.0	0.0	0.0	1.0	0.0	0.0	1.0	0.0	0.0	0.0	0.0	0.0	0.0	0.0	0.0
LUCAT1	100505994	symbol	H. sapiens	100505994	H. sapiens	LUCAT1	lung cancer associated transcript 1								0.0	0.0	0.0	0.0	0.0	0.0	0.0	0.0	0.0	0.0	0.0	0.0	0.0	0.0	0.0	0.0	0.0	0.0	0.0	0.0
UCP1	7350	symbol	H. sapiens	7350	H. sapiens	UCP1	uncoupling protein 1	GO:1903495 cellular response to dehydroepiandrosterone;GO:1903494 response to dehydroepiandrosterone;GO:0002024 diet induced thermogenesis		Human disease related genes:Endocrine and metabolic diseases:Other endocrine and metabolic diseases; Transporters:Electrochemical Potential-driven transporters					0.0	0.0	0.0	1.0	0.0	0.0	0.0	0.0	0.0	0.0	0.0	0.0	0.0	0.0	0.0	0.0	0.0	0.0	0.0	0.0
VNN3	55350	gene_synonym	H. sapiens	55350	H. sapiens	VNN3P	vanin 3, pseudogene			Predicted secreted proteins; Enzymes; ENZYME proteins:Hydrolases					0.0	0.0	0.0	0.0	0.0	0.0	0.0	0.0	0.0	0.0	0.0	0.0	0.0	0.0	0.0	0.0	0.0	0.0	0.0	0.0
SAA1	6288	symbol	H. sapiens	6288	H. sapiens	SAA1	serum amyloid A1	GO:0048246 macrophage chemotaxis;GO:1905517 macrophage migration;GO:0006953 acute-phase response		Disease related genes; Predicted secreted proteins					0.0	0.0	1.0	0.0	0.0	1.0	0.0	0.0	1.0	0.0	1.0	1.0	1.0	0.0	0.0	0.0	0.0	0.0	0.0	0.0
VNN1	8876	symbol	H. sapiens	8876	H. sapiens	VNN1	vanin 1	GO:0015939 pantothenate metabolic process;GO:0002544 chronic inflammatory response;GO:0033089 positive regulation of T cell differentiation in thymus		Predicted intracellular proteins; Enzymes; ENZYME proteins:Hydrolases	Vesicles (Approved)			(M5935)HALLMARK FATTY ACID METABOLISM; (M5934)HALLMARK XENOBIOTIC METABOLISM	0.0	0.0	1.0	0.0	0.0	0.0	0.0	0.0	1.0	0.0	0.0	0.0	0.0	0.0	0.0	0.0	0.0	1.0	0.0	0.0
CELSR1	9620	symbol	H. sapiens	9620	H. sapiens	CELSR1	cadherin EGF LAG seven-pass G-type receptor 1	GO:0060488 orthogonal dichotomous subdivision of terminal units involved in lung branching morphogenesis;GO:0060489 planar dichotomous subdivision of terminal units involved in lung branching morphogenesis;GO:0060490 lateral sprouting involved in lung morphogenesis		Transporters; G-protein coupled receptors:Family 2 (B) receptors; Disease related genes; G-protein coupled receptors:GPCRs excl olfactory receptors; Potential drug targets; Predicted intracellular proteins	Plasma membrane (Enhanced); Additional: Nucleoplasm			(M5919)HALLMARK HEDGEHOG SIGNALING; (M5906)HALLMARK ESTROGEN RESPONSE EARLY	0.0	0.0	0.0	0.0	0.0	0.0	0.0	0.0	0.0	0.0	0.0	0.0	0.0	0.0	0.0	0.0	0.0	1.0	0.0	0.0
ACY3	91703	symbol	H. sapiens	91703	H. sapiens	ACY3	aminoacylase 3	GO:0008150 biological_process		Predicted intracellular proteins; Enzymes; ENZYME proteins:Hydrolases					0.0	0.0	0.0	0.0	0.0	0.0	0.0	0.0	0.0	0.0	0.0	0.0	0.0	0.0	0.0	0.0	0.0	0.0	0.0	0.0
RP11-61L19.3						None	None	None	None	None	None	None	None	None	nan	nan	nan	nan	nan	nan	nan	nan	nan	nan	nan	nan	nan	nan	nan	nan	nan	nan	nan	nan
TENM2	57451	symbol	H. sapiens	57451	H. sapiens	TENM2	teneurin transmembrane protein 2	GO:0051491 positive regulation of filopodium assembly;GO:0051489 regulation of filopodium assembly;GO:0007157 heterophilic cell-cell adhesion via plasma membrane cell adhesion molecules		Transporters	Nucleoli (Approved)			(M5956)HALLMARK KRAS SIGNALING DN	0.0	0.0	0.0	0.0	0.0	0.0	0.0	0.0	0.0	0.0	0.0	0.0	0.0	0.0	0.0	0.0	0.0	1.0	0.0	0.0
KRT75	9119	symbol	H. sapiens	9119	H. sapiens	KRT75	keratin 75	GO:0045109 intermediate filament organization;GO:0031424 keratinization;GO:0045104 intermediate filament cytoskeleton organization		Disease related genes; Predicted intracellular proteins; Human disease related genes:Skin diseases:Skin and soft tissue diseases	Cytosol (Approved); Additional: Plasma membrane				0.0	0.0	0.0	0.0	1.0	1.0	0.0	0.0	0.0	0.0	0.0	0.0	0.0	0.0	0.0	0.0	0.0	0.0	0.0	0.0
HVCN1	84329	symbol	H. sapiens	84329	H. sapiens	HVCN1	hydrogen voltage gated channel 1	GO:0032930 positive regulation of superoxide anion generation;GO:0032928 regulation of superoxide anion generation;GO:0071294 cellular response to zinc ion		Predicted intracellular proteins; Transporters:Transporter channels and pores					0.0	0.0	0.0	0.0	0.0	0.0	0.0	0.0	0.0	0.0	0.0	0.0	0.0	0.0	0.0	0.0	0.0	0.0	0.0	0.0
APCDD1L-AS1	149773	gene_synonym	H. sapiens	149773	H. sapiens	APCDD1L-DT	APCDD1L divergent transcript								0.0	0.0	0.0	0.0	0.0	0.0	0.0	0.0	0.0	0.0	0.0	0.0	0.0	0.0	0.0	0.0	0.0	0.0	0.0	0.0
AGAP2-AS1	100130776	symbol	H. sapiens	100130776	H. sapiens	AGAP2-AS1	AGAP2 antisense RNA 1								0.0	0.0	0.0	0.0	0.0	0.0	0.0	0.0	0.0	0.0	0.0	0.0	0.0	0.0	0.0	0.0	0.0	0.0	0.0	0.0
IFI16	3428	symbol	H. sapiens	3428	H. sapiens	IFI16	interferon gamma inducible protein 16	GO:0030224 monocyte differentiation;GO:0097202 activation of cysteine-type endopeptidase activity;GO:0035458 cellular response to interferon-beta		Predicted intracellular proteins	Nucleoli;Nucleoplasm (Supported); Additional: Cytosol				0.0	0.0	1.0	0.0	0.0	1.0	1.0	0.0	1.0	1.0	1.0	1.0	0.0	1.0	0.0	0.0	0.0	0.0	0.0	0.0
LILRA5	353514	symbol	H. sapiens	353514	H. sapiens	LILRA5	leukocyte immunoglobulin like receptor A5	GO:0032696 negative regulation of interleukin-13 production;GO:0032695 negative regulation of interleukin-12 production;GO:0032656 regulation of interleukin-13 production		Predicted secreted proteins; CD markers					0.0	0.0	1.0	0.0	0.0	0.0	0.0	1.0	1.0	1.0	1.0	1.0	0.0	0.0	0.0	0.0	0.0	0.0	0.0	0.0
RNF212	285498	symbol	H. sapiens	285498	H. sapiens	RNF212	ring finger protein 212	GO:0006311 meiotic gene conversion;GO:0035822 gene conversion;GO:0051026 chiasma assembly		Predicted intracellular proteins					0.0	0.0	0.0	0.0	0.0	0.0	0.0	0.0	0.0	0.0	0.0	0.0	0.0	0.0	0.0	0.0	0.0	0.0	0.0	0.0
KRT15	3866	symbol	H. sapiens	3866	H. sapiens	KRT15	keratin 15	GO:0045109 intermediate filament organization;GO:0045104 intermediate filament cytoskeleton organization;GO:0045103 intermediate filament-based process		Predicted intracellular proteins; Cancer-related genes:Candidate cancer biomarkers	Intermediate filaments (Supported); Additional: Nucleoplasm			(M5906)HALLMARK ESTROGEN RESPONSE EARLY; (M5956)HALLMARK KRAS SIGNALING DN	0.0	0.0	0.0	0.0	1.0	0.0	0.0	0.0	0.0	0.0	0.0	0.0	0.0	0.0	0.0	0.0	0.0	0.0	0.0	0.0
SPP1	6696	symbol	H. sapiens	6696	H. sapiens	SPP1	secreted phosphoprotein 1	GO:0048683 regulation of collateral sprouting of intact axon in response to injury;GO:0048685 negative regulation of collateral sprouting of intact axon in response to injury;GO:2000866 positive regulation of estradiol secretion		Predicted secreted proteins; Cancer-related genes:Candidate cancer biomarkers	Golgi apparatus (Enhanced)		(M118)PID INTEGRIN A9B1 PATHWAY; (M63)PID AVB3 OPN PATHWAY; (M277)PID INTEGRIN A4B1 PATHWAY	(M5944)HALLMARK ANGIOGENESIS; (M5947)HALLMARK IL2 STAT5 SIGNALING; (M5930)HALLMARK EPITHELIAL MESENCHYMAL TRANSITION	0.0	0.0	1.0	1.0	0.0	0.0	0.0	0.0	0.0	0.0	0.0	1.0	0.0	0.0	0.0	0.0	0.0	0.0	0.0	0.0
PDLIM4	8572	symbol	H. sapiens	8572	H. sapiens	PDLIM4	PDZ and LIM domain 4	GO:0098976 excitatory chemical synaptic transmission;GO:0031532 actin cytoskeleton reorganization;GO:0007268 chemical synaptic transmission		Predicted intracellular proteins; Human disease related genes:Musculoskeletal diseases:Skeletal diseases	Actin filaments;Cytosol (Approved)			(M5930)HALLMARK EPITHELIAL MESENCHYMAL TRANSITION	0.0	0.0	0.0	0.0	0.0	0.0	0.0	0.0	0.0	0.0	0.0	0.0	0.0	0.0	0.0	0.0	0.0	0.0	0.0	0.0
PRKCQ-AS1	439949	symbol	H. sapiens	439949	H. sapiens	PRKCQ-AS1	PRKCQ antisense RNA 1								0.0	0.0	0.0	0.0	0.0	0.0	0.0	0.0	0.0	0.0	0.0	0.0	0.0	0.0	0.0	0.0	0.0	0.0	0.0	0.0
PRR33	102724536	symbol	H. sapiens	102724536	H. sapiens	PRR33	proline rich 33			Predicted intracellular proteins					0.0	0.0	0.0	0.0	0.0	0.0	0.0	0.0	0.0	0.0	0.0	0.0	0.0	0.0	0.0	0.0	0.0	0.0	0.0	0.0
TMEM156	80008	symbol	H. sapiens	80008	H. sapiens	TMEM156	transmembrane protein 156								0.0	0.0	0.0	0.0	0.0	0.0	0.0	0.0	0.0	0.0	0.0	0.0	0.0	0.0	0.0	0.0	0.0	0.0	0.0	0.0
FGFBP1	9982	symbol	H. sapiens	9982	H. sapiens	FGFBP1	fibroblast growth factor binding protein 1	GO:0045743 positive regulation of fibroblast growth factor receptor signaling pathway;GO:1903589 positive regulation of blood vessel endothelial cell proliferation involved in sprouting angiogenesis;GO:0090050 positive regulation of cell migration involved in sprouting angiogenesis		Predicted secreted proteins; Cancer-related genes:Mutated cancer genes			(M5883)NABA SECRETED FACTORS; (M5885)NABA MATRISOME ASSOCIATED; (M5889)NABA MATRISOME		1.0	0.0	0.0	0.0	0.0	0.0	0.0	0.0	1.0	0.0	0.0	0.0	0.0	0.0	0.0	0.0	0.0	0.0	0.0	0.0
FMO3	2328	symbol	H. sapiens	2328	H. sapiens	FMO3	flavin containing dimethylaniline monoxygenase 3			Predicted intracellular proteins; Human disease related genes:Congenital disorders of metabolism:Other congenital disorders of metabolism; Disease related genes; ENZYME proteins:Oxidoreductases; Potential drug targets; Enzymes				(M5934)HALLMARK XENOBIOTIC METABOLISM	0.0	0.0	0.0	0.0	0.0	0.0	0.0	0.0	0.0	0.0	0.0	0.0	0.0	0.0	0.0	0.0	0.0	0.0	0.0	0.0
TGM1	7051	symbol	H. sapiens	7051	H. sapiens	TGM1	transglutaminase 1	GO:0043163 cell envelope organization;GO:0010838 positive regulation of keratinocyte proliferation;GO:0018149 peptide cross-linking		Human disease related genes:Congenital malformations:Congenital malformations of skin; Predicted intracellular proteins; ENZYME proteins:Transferases; Disease related genes; Potential drug targets; Enzymes	Plasma membrane;Vesicles (Approved)		(M3468)NABA ECM REGULATORS; (M5885)NABA MATRISOME ASSOCIATED; (M5889)NABA MATRISOME	(M5956)HALLMARK KRAS SIGNALING DN	1.0	0.0	0.0	0.0	1.0	0.0	0.0	0.0	0.0	0.0	0.0	0.0	0.0	0.0	0.0	0.0	0.0	0.0	0.0	0.0
HCK	3055	symbol	H. sapiens	3055	H. sapiens	HCK	HCK proto-oncogene, Src family tyrosine kinase	GO:0002522 leukocyte migration involved in immune response;GO:0045728 respiratory burst after phagocytosis;GO:0002679 respiratory burst involved in defense response	Tyr protein kinase family	Predicted intracellular proteins; ENZYME proteins:Transferases; Disease related genes; Kinases:Tyr protein kinases; Potential drug targets; Enzymes	Vesicles (Supported); Additional: Cytosol;Plasma membrane	1-Ter-Butyl-3-P-Tolyl-1h-Pyrazolo[3,4-D]Pyrimidin-4-Ylamine; Phosphonotyrosine; Quercetin; Bosutinib; Fostamatinib	(M33)PID GLYPICAN 1PATHWAY; (M252)PID IL8 CXCR1 PATHWAY; (M76)PID P38 ALPHA BETA PATHWAY		0.0	0.0	1.0	1.0	0.0	1.0	1.0	0.0	1.0	1.0	0.0	1.0	0.0	1.0	0.0	0.0	0.0	0.0	0.0	0.0
M1AP	130951	symbol	H. sapiens	130951	H. sapiens	M1AP	meiosis 1 associated protein	GO:0051308 male meiosis chromosome separation;GO:0007060 male meiosis chromosome segregation;GO:0051307 meiotic chromosome separation		Predicted intracellular proteins	Mitochondria (Approved); Additional: Nucleoli				0.0	0.0	0.0	0.0	0.0	0.0	0.0	0.0	0.0	0.0	0.0	0.0	0.0	0.0	0.0	0.0	0.0	0.0	0.0	0.0
PAX7	5081	symbol	H. sapiens	5081	H. sapiens	PAX7	paired box 7	GO:0007517 muscle organ development;GO:0061061 muscle structure development;GO:0043066 negative regulation of apoptotic process		Cancer-related genes; Disease related genes; Transcription factors:Helix-turn-helix domains; Human disease related genes:Musculoskeletal diseases:Muscular diseases; Predicted intracellular proteins					0.0	0.0	0.0	0.0	0.0	0.0	0.0	0.0	0.0	0.0	0.0	0.0	0.0	0.0	0.0	0.0	0.0	0.0	0.0	0.0
CD14	929	symbol	H. sapiens	929	H. sapiens	CD14	CD14 molecule	GO:0071725 response to triacyl bacterial lipopeptide;GO:0071727 cellular response to triacyl bacterial lipopeptide;GO:0071724 response to diacyl bacterial lipopeptide		Human disease related genes:Immune system diseases:Allergies and autoimmune diseases; Predicted secreted proteins; CD markers; Cancer-related genes:Candidate cancer biomarkers; Transporters:Accessory Factors Involved in Transport	Vesicles (Approved)		(M264)PID TOLL ENDOGENOUS PATHWAY; (M277)PID INTEGRIN A4B1 PATHWAY; (M18)PID INTEGRIN1 PATHWAY	(M5897)HALLMARK IL6 JAK STAT3 SIGNALING; (M5902)HALLMARK APOPTOSIS; (M5932)HALLMARK INFLAMMATORY RESPONSE	0.0	0.0	1.0	1.0	0.0	0.0	1.0	1.0	0.0	0.0	1.0	0.0	0.0	0.0	0.0	0.0	1.0	0.0	0.0	0.0
SENCR	100507392	symbol	H. sapiens	100507392	H. sapiens	SENCR	smooth muscle and endothelial cell enriched migration/differentiation-associated lncRNA								0.0	0.0	0.0	0.0	0.0	0.0	0.0	0.0	0.0	0.0	0.0	0.0	0.0	0.0	0.0	0.0	0.0	0.0	0.0	0.0
GS1-600G8.5						None	None	None	None	None	None	None	None	None	nan	nan	nan	nan	nan	nan	nan	nan	nan	nan	nan	nan	nan	nan	nan	nan	nan	nan	nan	nan
STAB1	23166	symbol	H. sapiens	23166	H. sapiens	STAB1	stabilin 1	GO:0016525 negative regulation of angiogenesis;GO:2000181 negative regulation of blood vessel morphogenesis;GO:1901343 negative regulation of vasculature development		Transporters	Cytosol (Approved); Additional: Nucleoplasm;Plasma membrane			(M5932)HALLMARK INFLAMMATORY RESPONSE; (M5950)HALLMARK ALLOGRAFT REJECTION	0.0	0.0	1.0	1.0	0.0	0.0	0.0	0.0	0.0	0.0	0.0	0.0	0.0	0.0	0.0	0.0	0.0	0.0	0.0	0.0
GPR82	27197	symbol	H. sapiens	27197	H. sapiens	GPR82	G protein-coupled receptor 82	GO:0007186 G protein-coupled receptor signaling pathway;GO:0007165 signal transduction;GO:0023052 signaling		G-protein coupled receptors:GPCRs excl olfactory receptors					0.0	0.0	0.0	0.0	0.0	0.0	0.0	0.0	0.0	0.0	0.0	0.0	0.0	0.0	0.0	0.0	0.0	0.0	0.0	0.0
RPE65	6121	symbol	H. sapiens	6121	H. sapiens	RPE65	retinoid isomerohydrolase RPE65	GO:0016109 tetraterpenoid biosynthetic process;GO:0016117 carotenoid biosynthetic process;GO:0016123 xanthophyll biosynthetic process		ENZYME proteins:Isomerase; Predicted intracellular proteins; ENZYME proteins:Hydrolases; Human disease related genes:Nervous system diseases:Eye disease; Disease related genes; Enzymes; FDA approved drug targets:Biotech drugs		Voretigene neparvovec	(M117)PID CONE PATHWAY; (M204)PID RHODOPSIN PATHWAY		0.0	0.0	0.0	0.0	0.0	0.0	0.0	0.0	0.0	0.0	0.0	0.0	0.0	0.0	0.0	0.0	0.0	0.0	0.0	0.0
WNT3A	89780	symbol	H. sapiens	89780	H. sapiens	WNT3A	Wnt family member 3A	GO:0003136 negative regulation of heart induction by canonical Wnt signaling pathway;GO:0009997 negative regulation of cardioblast cell fate specification;GO:0042686 regulation of cardioblast cell fate specification		Predicted secreted proteins	Vesicles (Approved)		(M31)PID BETA CATENIN DEG PATHWAY; (M90)PID WNT CANONICAL PATHWAY; (M77)PID WNT SIGNALING PATHWAY		1.0	0.0	1.0	1.0	0.0	1.0	0.0	0.0	1.0	0.0	1.0	1.0	1.0	0.0	0.0	0.0	0.0	1.0	0.0	0.0
PARVB	29780	symbol	H. sapiens	29780	H. sapiens	PARVB	parvin beta	GO:0071963 establishment or maintenance of cell polarity regulating cell shape;GO:0030032 lamellipodium assembly;GO:0097581 lamellipodium organization		Predicted intracellular proteins; Cancer-related genes:Candidate cancer biomarkers	Cytosol (Approved)		(M71)PID ILK PATHWAY		0.0	0.0	0.0	0.0	0.0	0.0	0.0	0.0	0.0	0.0	0.0	0.0	0.0	0.0	0.0	0.0	0.0	0.0	0.0	0.0
CEACAM3	1084	symbol	H. sapiens	1084	H. sapiens	CEACAM3	CEA cell adhesion molecule 3	GO:0002682 regulation of immune system process;GO:0007165 signal transduction;GO:0023052 signaling		Predicted intracellular proteins; CD markers					0.0	0.0	0.0	0.0	0.0	0.0	0.0	0.0	0.0	0.0	0.0	0.0	0.0	0.0	0.0	0.0	0.0	0.0	0.0	0.0
TLL1	7092	symbol	H. sapiens	7092	H. sapiens	TLL1	tolloid like 1	GO:0030199 collagen fibril organization;GO:0009953 dorsal/ventral pattern formation;GO:0016485 protein processing		Disease related genes; Human disease related genes:Congenital malformations:Congenital malformations of the circulatory system; Predicted intracellular proteins; Predicted secreted proteins	Vesicles (Approved)		(M3468)NABA ECM REGULATORS; (M5885)NABA MATRISOME ASSOCIATED; (M5889)NABA MATRISOME		1.0	0.0	0.0	0.0	1.0	0.0	0.0	0.0	0.0	0.0	0.0	0.0	0.0	0.0	0.0	0.0	0.0	0.0	0.0	0.0
S100A7	6278	symbol	H. sapiens	6278	H. sapiens	S100A7	S100 calcium binding protein A7	GO:0051238 sequestering of metal ion;GO:0010820 positive regulation of T cell chemotaxis;GO:0010819 regulation of T cell chemotaxis		Predicted intracellular proteins; Predicted secreted proteins; Cancer-related genes:Candidate cancer biomarkers	Cytosol (Uncertain)	Ibuprofen; Zinc; 8-anilinonaphthalene-1-sulfonic acid; Dexibuprofen; Zinc acetate; Zinc chloride; Zinc sulfate, unspecified form	(M254)PID MYC REPRESS PATHWAY; (M5883)NABA SECRETED FACTORS; (M5885)NABA MATRISOME ASSOCIATED		1.0	0.0	0.0	1.0	1.0	0.0	0.0	0.0	0.0	1.0	0.0	0.0	0.0	0.0	1.0	0.0	0.0	0.0	0.0	0.0
TSPAN7	7102	symbol	H. sapiens	7102	H. sapiens	TSPAN7	tetraspanin 7			CD markers; Disease related genes; Potential drug targets; Transporters:Accessory Factors Involved in Transport; Human disease related genes:Other diseases:Mental and behavioural disorders				(M5953)HALLMARK KRAS SIGNALING UP	0.0	0.0	0.0	0.0	0.0	0.0	0.0	0.0	0.0	0.0	0.0	0.0	0.0	0.0	0.0	0.0	0.0	0.0	0.0	0.0
SGK1	6446	symbol	H. sapiens	6446	H. sapiens	SGK1	serum/glucocorticoid regulated kinase 1	GO:1904045 cellular response to aldosterone;GO:0070294 renal sodium ion absorption;GO:0060453 regulation of gastric acid secretion	AGC Ser/Thr protein kinase family	Predicted intracellular proteins; ENZYME proteins:Transferases; Cancer-related genes:Mutated cancer genes; Kinases:AGC Ser/Thr protein kinases; Cancer-related genes:Mutational cancer driver genes; Enzymes	Nuclear speckles (Enhanced)	Flavin mononucleotide; [4-(5-naphthalen-2-yl-1H-pyrrolo[2,3-b]pyridin-3-yl)phenyl]acetic acid; 4-(5-phenyl-1H-pyrrolo[2,3-b]pyridin-3-yl)benzoic acid	(M16)PID INSULIN PATHWAY; (M141)PID PI3KCI PATHWAY; (M136)PID FOXO PATHWAY	(M5908)HALLMARK ANDROGEN RESPONSE; (M5890)HALLMARK TNFA SIGNALING VIA NFKB; (M5907)HALLMARK ESTROGEN RESPONSE LATE	0.0	0.0	0.0	1.0	0.0	0.0	0.0	0.0	0.0	0.0	0.0	0.0	0.0	0.0	0.0	0.0	0.0	0.0	0.0	0.0
AC007879.7						None	None	None	None	None	None	None	None	None	nan	nan	nan	nan	nan	nan	nan	nan	nan	nan	nan	nan	nan	nan	nan	nan	nan	nan	nan	nan
NCF1B	654816	symbol	H. sapiens	654816	H. sapiens	NCF1B	neutrophil cytosolic factor 1B pseudogene	GO:0042554 superoxide anion generation;GO:0045730 respiratory burst;GO:0006801 superoxide metabolic process							0.0	0.0	0.0	0.0	0.0	0.0	0.0	0.0	0.0	0.0	0.0	0.0	0.0	0.0	0.0	0.0	0.0	0.0	0.0	0.0
RP5-1171I10.5						None	None	None	None	None	None	None	None	None	nan	nan	nan	nan	nan	nan	nan	nan	nan	nan	nan	nan	nan	nan	nan	nan	nan	nan	nan	nan
AC096559.1						None	None	None	None	None	None	None	None	None	nan	nan	nan	nan	nan	nan	nan	nan	nan	nan	nan	nan	nan	nan	nan	nan	nan	nan	nan	nan
NCF1C	654817	symbol	H. sapiens	654817	H. sapiens	NCF1C	neutrophil cytosolic factor 1C pseudogene	GO:0042554 superoxide anion generation;GO:0045730 respiratory burst;GO:0006801 superoxide metabolic process							0.0	0.0	0.0	0.0	0.0	0.0	0.0	0.0	0.0	0.0	0.0	0.0	0.0	0.0	0.0	0.0	0.0	0.0	0.0	0.0
NCF1	653361	symbol	H. sapiens	653361	H. sapiens	NCF1	neutrophil cytosolic factor 1	GO:0060264 regulation of respiratory burst involved in inflammatory response;GO:0045741 positive regulation of epidermal growth factor-activated receptor activity;GO:1903409 reactive oxygen species biosynthetic process		Disease related genes; Human disease related genes:Immune system diseases:Primary immunodeficiency; Predicted intracellular proteins			(M278)PID RAC1 PATHWAY		0.0	0.0	1.0	0.0	0.0	0.0	0.0	1.0	0.0	1.0	0.0	1.0	0.0	1.0	0.0	0.0	0.0	0.0	0.0	0.0
EMP3	2014	symbol	H. sapiens	2014	H. sapiens	EMP3	epithelial membrane protein 3	GO:0032060 bleb assembly;GO:0120031 plasma membrane bounded cell projection assembly;GO:0030031 cell projection assembly		Predicted intracellular proteins	Plasma membrane;Vesicles (Approved)			(M5930)HALLMARK EPITHELIAL MESENCHYMAL TRANSITION; (M5932)HALLMARK INFLAMMATORY RESPONSE	0.0	0.0	0.0	0.0	0.0	0.0	0.0	0.0	0.0	0.0	0.0	0.0	0.0	0.0	0.0	0.0	0.0	0.0	0.0	0.0
RRN3P1	730092	symbol	H. sapiens	730092	H. sapiens	RRN3P1	RRN3 pseudogene 1	GO:0006361 transcription initiation from RNA polymerase I promoter;GO:0006360 transcription by RNA polymerase I;GO:0006352 DNA-templated transcription, initiation							0.0	0.0	0.0	0.0	0.0	0.0	0.0	0.0	0.0	0.0	0.0	0.0	0.0	0.0	0.0	0.0	0.0	0.0	0.0	0.0
NKAIN1	79570	symbol	H. sapiens	79570	H. sapiens	NKAIN1	sodium/potassium transporting ATPase interacting 1	GO:0002028 regulation of sodium ion transport;GO:0010959 regulation of metal ion transport;GO:0043269 regulation of ion transport		Transporters:Accessory Factors Involved in Transport					0.0	0.0	0.0	0.0	0.0	0.0	0.0	0.0	0.0	0.0	0.0	0.0	0.0	0.0	0.0	0.0	0.0	0.0	0.0	0.0
RP11-993B23.3						None	None	None	None	None	None	None	None	None	nan	nan	nan	nan	nan	nan	nan	nan	nan	nan	nan	nan	nan	nan	nan	nan	nan	nan	nan	nan
TCL1A	8115	symbol	H. sapiens	8115	H. sapiens	TCL1A	TCL1 family AKT coactivator A	GO:0010918 positive regulation of mitochondrial membrane potential;GO:0045838 positive regulation of membrane potential;GO:0051881 regulation of mitochondrial membrane potential		Disease related genes; Cancer-related genes; Predicted intracellular proteins	Cytosol;Endoplasmic reticulum (Enhanced); Additional: Nucleoplasm			(M5956)HALLMARK KRAS SIGNALING DN	0.0	0.0	1.0	0.0	0.0	0.0	0.0	0.0	0.0	0.0	0.0	0.0	0.0	0.0	0.0	0.0	0.0	0.0	0.0	0.0
FERMT3	83706	symbol	H. sapiens	83706	H. sapiens	FERMT3	FERM domain containing kindlin 3	GO:0033622 integrin activation;GO:0033632 regulation of cell-cell adhesion mediated by integrin;GO:0070527 platelet aggregation		Disease related genes; Human disease related genes:Immune system diseases:Primary immunodeficiency; Predicted intracellular proteins	Vesicles (Approved)				0.0	0.0	0.0	0.0	0.0	1.0	0.0	0.0	1.0	0.0	0.0	0.0	0.0	0.0	0.0	0.0	0.0	1.0	0.0	0.0
BEGAIN	57596	symbol	H. sapiens	57596	H. sapiens	BEGAIN	brain enriched guanylate kinase associated	GO:0098962 regulation of postsynaptic neurotransmitter receptor activity;GO:0099601 regulation of neurotransmitter receptor activity;GO:0031644 regulation of nervous system process		Predicted intracellular proteins	Nucleoplasm (Approved); Additional: Cytosol;Golgi apparatus				0.0	0.0	0.0	0.0	0.0	0.0	0.0	0.0	0.0	0.0	0.0	0.0	0.0	0.0	0.0	0.0	0.0	0.0	0.0	0.0
KYNU	8942	symbol	H. sapiens	8942	H. sapiens	KYNU	kynureninase	GO:0034516 response to vitamin B6;GO:0019805 quinolinate biosynthetic process;GO:0043420 anthranilate metabolic process		Predicted intracellular proteins; ENZYME proteins:Hydrolases; Human disease related genes:Congenital disorders of metabolism:Congenital disorders of amino acid metabolism; Disease related genes; Potential drug targets; Enzymes	Cytosol (Supported); Additional: Nucleoplasm	Pyridoxal phosphate; Alanine; m-Hydroxyhippuric acid		(M5890)HALLMARK TNFA SIGNALING VIA NFKB; (M5921)HALLMARK COMPLEMENT; (M5934)HALLMARK XENOBIOTIC METABOLISM	0.0	0.0	1.0	0.0	0.0	0.0	0.0	0.0	0.0	0.0	0.0	0.0	0.0	0.0	0.0	0.0	0.0	0.0	0.0	0.0
SNAI3	333929	symbol	H. sapiens	333929	H. sapiens	SNAI3	snail family transcriptional repressor 3	GO:0000122 negative regulation of transcription by RNA polymerase II;GO:0045892 negative regulation of transcription, DNA-templated;GO:1903507 negative regulation of nucleic acid-templated transcription		Transcription factors:Zinc-coordinating DNA-binding domains; Predicted intracellular proteins	Nucleoplasm (Approved)				0.0	0.0	0.0	0.0	0.0	0.0	0.0	0.0	0.0	0.0	0.0	0.0	0.0	0.0	0.0	0.0	0.0	0.0	0.0	0.0
CD1D	912	symbol	H. sapiens	912	H. sapiens	CD1D	CD1d molecule	GO:0048006 antigen processing and presentation, endogenous lipid antigen via MHC class Ib;GO:0048003 antigen processing and presentation of lipid antigen via MHC class Ib;GO:0048007 antigen processing and presentation, exogenous lipid antigen via MHC class Ib		Cancer-related genes:Mutated cancer genes; CD markers	Endoplasmic reticulum (Supported)	cis-tetracosenoyl sulfatide		(M5935)HALLMARK FATTY ACID METABOLISM; (M5950)HALLMARK ALLOGRAFT REJECTION	0.0	0.0	0.0	1.0	0.0	1.0	1.0	1.0	1.0	1.0	0.0	1.0	0.0	1.0	0.0	1.0	1.0	1.0	0.0	0.0
RNF175	285533	symbol	H. sapiens	285533	H. sapiens	RNF175	ring finger protein 175	GO:0030433 ubiquitin-dependent ERAD pathway;GO:0036503 ERAD pathway;GO:0034976 response to endoplasmic reticulum stress							0.0	0.0	0.0	0.0	0.0	0.0	0.0	0.0	0.0	0.0	0.0	0.0	0.0	0.0	0.0	0.0	0.0	0.0	0.0	0.0
RP6-159A1.4						None	None	None	None	None	None	None	None	None	nan	nan	nan	nan	nan	nan	nan	nan	nan	nan	nan	nan	nan	nan	nan	nan	nan	nan	nan	nan
ISG20	3669	symbol	H. sapiens	3669	H. sapiens	ISG20	interferon stimulated exonuclease gene 20	GO:0000738 DNA catabolic process, exonucleolytic;GO:0006308 DNA catabolic process;GO:0090503 RNA phosphodiester bond hydrolysis, exonucleolytic		Predicted intracellular proteins; Enzymes; ENZYME proteins:Hydrolases		Uridine monophosphate		(M5911)HALLMARK INTERFERON ALPHA RESPONSE; (M5902)HALLMARK APOPTOSIS; (M5891)HALLMARK HYPOXIA	0.0	0.0	1.0	0.0	0.0	0.0	0.0	0.0	0.0	0.0	0.0	0.0	0.0	0.0	0.0	0.0	0.0	0.0	0.0	0.0
AC147651.4						None	None	None	None	None	None	None	None	None	nan	nan	nan	nan	nan	nan	nan	nan	nan	nan	nan	nan	nan	nan	nan	nan	nan	nan	nan	nan
CARD16	114769	symbol	H. sapiens	114769	H. sapiens	CARD16	caspase recruitment domain family member 16	GO:0071494 cellular response to UV-C;GO:0097340 inhibition of cysteine-type endopeptidase activity;GO:0097341 zymogen inhibition							0.0	0.0	0.0	1.0	0.0	0.0	0.0	0.0	0.0	1.0	1.0	1.0	0.0	0.0	0.0	0.0	0.0	0.0	0.0	0.0
KRT17P3	729682	symbol	H. sapiens	729682	H. sapiens	KRT17P3	keratin 17 pseudogene 3								0.0	0.0	0.0	0.0	0.0	0.0	0.0	0.0	0.0	0.0	0.0	0.0	0.0	0.0	0.0	0.0	0.0	0.0	0.0	0.0
CD38	952	symbol	H. sapiens	952	H. sapiens	CD38	CD38 molecule	GO:0014824 artery smooth muscle contraction;GO:0014820 tonic smooth muscle contraction;GO:0014829 vascular associated smooth muscle contraction		Predicted intracellular proteins; ENZYME proteins:Hydrolases; ENZYME proteins:Transferases; CD markers; Enzymes; Cancer-related genes:Candidate cancer biomarkers	Plasma membrane (Supported)	Daratumumab; Isatuximab		(M5897)HALLMARK IL6 JAK STAT3 SIGNALING; (M5902)HALLMARK APOPTOSIS; (M5913)HALLMARK INTERFERON GAMMA RESPONSE	0.0	0.0	1.0	0.0	0.0	0.0	1.0	0.0	1.0	0.0	0.0	0.0	1.0	0.0	0.0	0.0	1.0	0.0	0.0	0.0
LST1	7940	symbol	H. sapiens	7940	H. sapiens	LST1	leukocyte specific transcript 1	GO:0050672 negative regulation of lymphocyte proliferation;GO:0032945 negative regulation of mononuclear cell proliferation;GO:0070664 negative regulation of leukocyte proliferation		Predicted intracellular proteins	Cytosol;Plasma membrane (Supported)				0.0	0.0	0.0	0.0	0.0	0.0	0.0	0.0	1.0	0.0	0.0	0.0	0.0	0.0	0.0	0.0	0.0	0.0	0.0	0.0
TM4SF19	116211	symbol	H. sapiens	116211	H. sapiens	TM4SF19	transmembrane 4 L six family member 19			Predicted intracellular proteins; Transporters:Accessory Factors Involved in Transport					0.0	0.0	0.0	0.0	0.0	0.0	0.0	0.0	0.0	0.0	0.0	0.0	0.0	0.0	0.0	0.0	0.0	0.0	0.0	0.0
RNU2-27P	106481642	symbol	H. sapiens	106481642	H. sapiens	RNU2-27P	RNA, U2 small nuclear 27, pseudogene								0.0	0.0	0.0	0.0	0.0	0.0	0.0	0.0	0.0	0.0	0.0	0.0	0.0	0.0	0.0	0.0	0.0	0.0	0.0	0.0
STEAP1B	256227	symbol	H. sapiens	256227	H. sapiens	STEAP1B	STEAP family member 1B								0.0	0.0	0.0	0.0	0.0	0.0	0.0	0.0	0.0	0.0	0.0	0.0	0.0	0.0	0.0	0.0	0.0	0.0	0.0	0.0
SPRR2A	6700	symbol	H. sapiens	6700	H. sapiens	SPRR2A	small proline rich protein 2A	GO:0048874 host-mediated regulation of intestinal microbiota composition;GO:0019731 antibacterial humoral response;GO:0051851 modulation by host of symbiont process		Predicted intracellular proteins					0.0	0.0	0.0	1.0	1.0	0.0	0.0	0.0	0.0	0.0	0.0	0.0	0.0	0.0	1.0	0.0	0.0	0.0	0.0	0.0
TMEM171	134285	symbol	H. sapiens	134285	H. sapiens	TMEM171	transmembrane protein 171								0.0	0.0	0.0	0.0	0.0	0.0	0.0	0.0	0.0	0.0	0.0	0.0	0.0	0.0	0.0	0.0	0.0	0.0	0.0	0.0
WAS	7454	symbol	H. sapiens	7454	H. sapiens	WAS	WASP actin nucleation promoting factor	GO:0002625 regulation of T cell antigen processing and presentation;GO:0032488 Cdc42 protein signal transduction;GO:2000601 positive regulation of Arp2/3 complex-mediated actin nucleation		Cancer-related genes; Disease related genes; Human disease related genes:Cardiovascular diseases:Hematologic diseases; Human disease related genes:Immune system diseases:Primary immunodeficiency; Predicted intracellular proteins	Plasma membrane (Approved); Additional: Cytosol	(S)-wiskostatin	(M34)PID TCR PATHWAY	(M5921)HALLMARK COMPLEMENT; (M5950)HALLMARK ALLOGRAFT REJECTION	0.0	0.0	1.0	0.0	1.0	1.0	0.0	1.0	0.0	0.0	0.0	0.0	0.0	1.0	0.0	0.0	0.0	0.0	0.0	0.0
IRX2	153572	symbol	H. sapiens	153572	H. sapiens	IRX2	iroquois homeobox 2	GO:0072272 proximal/distal pattern formation involved in metanephric nephron development;GO:0072268 pattern specification involved in metanephros development;GO:0072086 specification of loop of Henle identity		Transcription factors:Helix-turn-helix domains; Predicted intracellular proteins	Nucleoli;Nucleoplasm (Approved)				0.0	0.0	0.0	0.0	0.0	0.0	0.0	0.0	0.0	0.0	0.0	0.0	0.0	0.0	0.0	0.0	0.0	0.0	0.0	0.0
CPNE8	144402	symbol	H. sapiens	144402	H. sapiens	CPNE8	copine 8	GO:0071277 cellular response to calcium ion;GO:0051592 response to calcium ion;GO:0071248 cellular response to metal ion		Predicted intracellular proteins					0.0	0.0	0.0	0.0	0.0	0.0	0.0	0.0	0.0	0.0	0.0	0.0	0.0	0.0	0.0	0.0	0.0	0.0	0.0	0.0
RP11-411K7.1						None	None	None	None	None	None	None	None	None	nan	nan	nan	nan	nan	nan	nan	nan	nan	nan	nan	nan	nan	nan	nan	nan	nan	nan	nan	nan
BATF3	55509	symbol	H. sapiens	55509	H. sapiens	BATF3	basic leucine zipper ATF-like transcription factor 3	GO:0043011 myeloid dendritic cell differentiation;GO:0001773 myeloid dendritic cell activation;GO:0140467 integrated stress response signaling		Transcription factors:Basic domains; Predicted intracellular proteins	Nucleoli (Supported); Additional: Cytosol;Nucleoplasm		(M235)PID TCR CALCIUM PATHWAY; (M60)PID NFAT TFPATHWAY	(M5947)HALLMARK IL2 STAT5 SIGNALING	0.0	0.0	0.0	0.0	0.0	1.0	0.0	0.0	0.0	0.0	0.0	0.0	0.0	0.0	0.0	0.0	0.0	0.0	0.0	0.0
SH2D5	400745	symbol	H. sapiens	400745	H. sapiens	SH2D5	SH2 domain containing 5			Predicted intracellular proteins	Cytosol (Approved)				0.0	0.0	0.0	0.0	0.0	0.0	0.0	0.0	0.0	0.0	0.0	0.0	0.0	0.0	0.0	0.0	0.0	0.0	0.0	0.0
ALDH3A1	218	symbol	H. sapiens	218	H. sapiens	ALDH3A1	aldehyde dehydrogenase 3 family member A1	GO:0006081 cellular aldehyde metabolic process;GO:0006805 xenobiotic metabolic process;GO:0071466 cellular response to xenobiotic stimulus		ENZYME proteins:Oxidoreductases; Predicted intracellular proteins; Enzymes	Cytosol;Plasma membrane (Supported); Additional: Nucleoplasm;Vesicles	NADH		(M5935)HALLMARK FATTY ACID METABOLISM; (M5934)HALLMARK XENOBIOTIC METABOLISM	0.0	0.0	0.0	0.0	0.0	0.0	0.0	0.0	0.0	0.0	0.0	0.0	0.0	0.0	0.0	0.0	0.0	0.0	0.0	0.0
NEFL	4747	symbol	H. sapiens	4747	H. sapiens	NEFL	neurofilament light chain	GO:0045105 intermediate filament polymerization or depolymerization;GO:1903937 response to acrylamide;GO:0033693 neurofilament bundle assembly		Disease related genes; Human disease related genes:Nervous system diseases:Neurodegenerative diseases; Predicted intracellular proteins	Intermediate filaments;Nucleoplasm (Approved); Additional: Midbody				0.0	0.0	0.0	0.0	1.0	0.0	0.0	0.0	0.0	0.0	0.0	0.0	0.0	0.0	0.0	0.0	0.0	0.0	0.0	0.0
SLC47A1	55244	symbol	H. sapiens	55244	H. sapiens	SLC47A1	solute carrier family 47 member 1	GO:0097638 L-arginine import across plasma membrane;GO:1903826 L-arginine transmembrane transport;GO:1990961 xenobiotic detoxification by transmembrane export across the plasma membrane		Transporters:Electrochemical Potential-driven transporters					0.0	0.0	0.0	0.0	0.0	0.0	0.0	0.0	0.0	0.0	0.0	0.0	0.0	0.0	0.0	0.0	0.0	0.0	0.0	0.0
LTF	4057	symbol	H. sapiens	4057	H. sapiens	LTF	lactotransferrin	GO:2000308 negative regulation of tumor necrosis factor (ligand) superfamily member 11 production;GO:1900159 positive regulation of bone mineralization involved in bone maturation;GO:1900190 regulation of single-species biofilm formation		Predicted intracellular proteins; Predicted secreted proteins; Cancer-related genes:Candidate cancer biomarkers		3h-Indole-5,6-Diol; Lauric acid; Nitrilotriacetic acid; alpha-D-Fucopyranose; Nimesulide; (R)-Atenolol; Parecoxib		(M5907)HALLMARK ESTROGEN RESPONSE LATE; (M5921)HALLMARK COMPLEMENT	0.0	0.0	0.0	1.0	0.0	0.0	0.0	0.0	1.0	1.0	1.0	1.0	0.0	0.0	1.0	0.0	0.0	0.0	0.0	0.0
EMR1	2015	gene_synonym	H. sapiens	2015	H. sapiens	ADGRE1	adhesion G protein-coupled receptor E1	GO:0007189 adenylate cyclase-activating G protein-coupled receptor signaling pathway;GO:0007188 adenylate cyclase-modulating G protein-coupled receptor signaling pathway;GO:0002250 adaptive immune response		G-protein coupled receptors:GPCRs excl olfactory receptors; G-protein coupled receptors:Family 2 (B) receptors; Predicted intracellular proteins; Transporters				(M5932)HALLMARK INFLAMMATORY RESPONSE	0.0	1.0	0.0	0.0	0.0	0.0	0.0	0.0	0.0	0.0	0.0	0.0	1.0	0.0	0.0	0.0	0.0	0.0	0.0	0.0
CCL20	6364	symbol	H. sapiens	6364	H. sapiens	CCL20	C-C motif chemokine ligand 20	GO:0072679 thymocyte migration;GO:0035584 calcium-mediated signaling using intracellular calcium source;GO:0072678 T cell migration		Predicted secreted proteins			(M5883)NABA SECRETED FACTORS; (M5885)NABA MATRISOME ASSOCIATED; (M5889)NABA MATRISOME	(M5890)HALLMARK TNFA SIGNALING VIA NFKB; (M5932)HALLMARK INFLAMMATORY RESPONSE; (M5953)HALLMARK KRAS SIGNALING UP	1.0	0.0	1.0	1.0	0.0	0.0	0.0	0.0	0.0	0.0	0.0	0.0	1.0	0.0	0.0	0.0	0.0	0.0	0.0	0.0
TLR2	7097	symbol	H. sapiens	7097	H. sapiens	TLR2	toll like receptor 2	GO:0042495 detection of triacyl bacterial lipopeptide;GO:0038124 toll-like receptor TLR6:TLR2 signaling pathway;GO:0042496 detection of diacyl bacterial lipopeptide		Human disease related genes:Skin diseases:Skin and soft tissue diseases; Predicted intracellular proteins; ENZYME proteins:Hydrolases; Human disease related genes:Immune system diseases:Allergies and autoimmune diseases; Transporters:Accessory Factors Involved in Transport; CD markers; Enzymes; FDA approved drug targets:Small molecule drugs; FDA approved drug targets:Biotech drugs	Mitochondria;Nucleoplasm (Supported)	Lyme disease vaccine (recombinant OspA); Adapalene; S-(Dimethylarsenic)Cysteine; Golotimod; Tuberculin purified protein derivative	(M264)PID TOLL ENDOGENOUS PATHWAY	(M5897)HALLMARK IL6 JAK STAT3 SIGNALING; (M5890)HALLMARK TNFA SIGNALING VIA NFKB; (M5932)HALLMARK INFLAMMATORY RESPONSE	0.0	0.0	1.0	1.0	0.0	1.0	1.0	1.0	1.0	1.0	1.0	1.0	0.0	0.0	0.0	0.0	0.0	0.0	0.0	0.0
AKR1C7P	648947	symbol	H. sapiens	648947	H. sapiens	AKR1C7P	aldo-keto reductase family 1 member C7, pseudogene								0.0	0.0	0.0	0.0	0.0	0.0	0.0	0.0	0.0	0.0	0.0	0.0	0.0	0.0	0.0	0.0	0.0	0.0	0.0	0.0
PTHLH	5744	symbol	H. sapiens	5744	H. sapiens	PTHLH	parathyroid hormone like hormone	GO:0061182 negative regulation of chondrocyte development;GO:0061181 regulation of chondrocyte development;GO:0002076 osteoblast development		Disease related genes; Predicted secreted proteins; Human disease related genes:Congenital malformations:Congenital malformations of the musculoskeletal system; Cancer-related genes:Candidate cancer biomarkers	Cytosol;Nucleoplasm (Supported); Additional: Golgi apparatus		(M211)PID HEDGEHOG 2PATHWAY	(M5930)HALLMARK EPITHELIAL MESENCHYMAL TRANSITION	0.0	0.0	0.0	0.0	1.0	0.0	0.0	0.0	1.0	0.0	0.0	0.0	1.0	0.0	0.0	0.0	0.0	0.0	0.0	0.0
ADH6	130	symbol	H. sapiens	130	H. sapiens	ADH6	alcohol dehydrogenase 6 (class V)	GO:0006069 ethanol oxidation;GO:0006067 ethanol metabolic process;GO:0042573 retinoic acid metabolic process		ENZYME proteins:Oxidoreductases; Predicted intracellular proteins; Enzymes					0.0	0.0	0.0	0.0	0.0	0.0	0.0	0.0	0.0	0.0	0.0	0.0	0.0	0.0	0.0	0.0	0.0	0.0	0.0	0.0
VASH2	79805	symbol	H. sapiens	79805	H. sapiens	VASH2	vasohibin 2	GO:0060716 labyrinthine layer blood vessel development;GO:0060674 placenta blood vessel development;GO:0000768 syncytium formation by plasma membrane fusion		Predicted secreted proteins; Predicted intracellular proteins; Enzymes; ENZYME proteins:Hydrolases	Cytosol (Approved)				0.0	0.0	0.0	0.0	0.0	0.0	0.0	0.0	0.0	0.0	0.0	0.0	0.0	0.0	0.0	0.0	0.0	0.0	0.0	0.0
TRIM16L	147166	symbol	H. sapiens	147166	H. sapiens	TRIM16L	tripartite motif containing 16 like								0.0	0.0	0.0	0.0	0.0	0.0	0.0	0.0	0.0	0.0	0.0	0.0	0.0	0.0	0.0	0.0	0.0	0.0	0.0	0.0
RP11-834C11.7						None	None	None	None	None	None	None	None	None	nan	nan	nan	nan	nan	nan	nan	nan	nan	nan	nan	nan	nan	nan	nan	nan	nan	nan	nan	nan
CEACAM4	1089	symbol	H. sapiens	1089	H. sapiens	CEACAM4	CEA cell adhesion molecule 4	GO:0006909 phagocytosis;GO:0016192 vesicle-mediated transport;GO:0002682 regulation of immune system process							0.0	0.0	0.0	0.0	0.0	0.0	0.0	0.0	0.0	0.0	0.0	0.0	0.0	0.0	0.0	0.0	0.0	0.0	0.0	0.0
TLR10	81793	symbol	H. sapiens	81793	H. sapiens	TLR10	toll like receptor 10	GO:0034166 toll-like receptor 10 signaling pathway;GO:0002755 MyD88-dependent toll-like receptor signaling pathway;GO:0002224 toll-like receptor signaling pathway		Predicted intracellular proteins; Enzymes; ENZYME proteins:Hydrolases; CD markers	Cytosol (Approved); Additional: Centrosome				0.0	0.0	1.0	0.0	0.0	0.0	1.0	0.0	0.0	1.0	0.0	1.0	0.0	0.0	0.0	0.0	0.0	0.0	0.0	0.0
RHOH	399	symbol	H. sapiens	399	H. sapiens	RHOH	ras homolog family member H	GO:0043652 engulfment of apoptotic cell;GO:0016601 Rac protein signal transduction;GO:0045576 mast cell activation		Disease related genes; Cancer-related genes; Predicted intracellular proteins; Human disease related genes:Skin diseases:Skin and soft tissue diseases	Golgi apparatus;Vesicles (Approved)			(M5947)HALLMARK IL2 STAT5 SIGNALING	0.0	0.0	1.0	0.0	1.0	1.0	0.0	0.0	1.0	0.0	0.0	0.0	0.0	0.0	0.0	0.0	0.0	0.0	0.0	0.0
C16orf54	283897	symbol	H. sapiens	283897	H. sapiens	C16orf54	chromosome 16 open reading frame 54								0.0	0.0	0.0	0.0	0.0	0.0	0.0	0.0	0.0	0.0	0.0	0.0	0.0	0.0	0.0	0.0	0.0	0.0	0.0	0.0
CYTH4	27128	symbol	H. sapiens	27128	H. sapiens	CYTH4	cytohesin 4	GO:0032012 regulation of ARF protein signal transduction;GO:0046578 regulation of Ras protein signal transduction;GO:0051056 regulation of small GTPase mediated signal transduction		Predicted intracellular proteins	Plasma membrane (Supported); Additional: Centriolar satellite;Cytokinetic bridge;Cytosol				0.0	0.0	0.0	0.0	0.0	0.0	0.0	0.0	0.0	0.0	0.0	0.0	0.0	0.0	0.0	0.0	0.0	0.0	0.0	0.0
IRF8	3394	symbol	H. sapiens	3394	H. sapiens	IRF8	interferon regulatory factor 8	GO:0002273 plasmacytoid dendritic cell differentiation;GO:0002270 plasmacytoid dendritic cell activation;GO:0002316 follicular B cell differentiation		Disease related genes; Transcription factors:Helix-turn-helix domains; Human disease related genes:Immune system diseases:Primary immunodeficiency; Predicted intracellular proteins	Nucleoplasm (Enhanced)		(M22)PID GMCSF PATHWAY; (M254)PID MYC REPRESS PATHWAY	(M5947)HALLMARK IL2 STAT5 SIGNALING; (M5913)HALLMARK INTERFERON GAMMA RESPONSE; (M5934)HALLMARK XENOBIOTIC METABOLISM	0.0	0.0	1.0	1.0	0.0	1.0	0.0	0.0	0.0	0.0	1.0	0.0	0.0	0.0	0.0	1.0	0.0	0.0	0.0	0.0
PTPN7	5778	symbol	H. sapiens	5778	H. sapiens	PTPN7	protein tyrosine phosphatase non-receptor type 7	GO:0035335 peptidyl-tyrosine dephosphorylation;GO:0000165 MAPK cascade;GO:0006470 protein dephosphorylation		Predicted intracellular proteins; Enzymes; ENZYME proteins:Hydrolases	Cytosol (Supported); Additional: Microtubules;Mitotic spindle		(M134)PID TCR RAS PATHWAY; (M272)PID CD8 TCR DOWNSTREAM PATHWAY		0.0	0.0	1.0	0.0	0.0	0.0	0.0	0.0	0.0	0.0	0.0	0.0	0.0	0.0	0.0	0.0	0.0	0.0	0.0	0.0
CACNG8	59283	symbol	H. sapiens	59283	H. sapiens	CACNG8	calcium voltage-gated channel auxiliary subunit gamma 8	GO:0098943 neurotransmitter receptor transport, postsynaptic endosome to lysosome;GO:0098953 receptor diffusion trapping;GO:0098970 postsynaptic neurotransmitter receptor diffusion trapping		Transporters:Accessory Factors Involved in Transport; FDA approved drug targets:Small molecule drugs					0.0	0.0	0.0	0.0	0.0	0.0	0.0	0.0	0.0	0.0	0.0	0.0	0.0	0.0	0.0	0.0	0.0	0.0	0.0	0.0
CLEC4A	50856	symbol	H. sapiens	50856	H. sapiens	CLEC4A	C-type lectin domain family 4 member A	GO:0002470 plasmacytoid dendritic cell antigen processing and presentation;GO:0002468 dendritic cell antigen processing and presentation;GO:0042590 antigen processing and presentation of exogenous peptide antigen via MHC class I		Predicted intracellular proteins; CD markers			(M5880)NABA ECM AFFILIATED; (M5885)NABA MATRISOME ASSOCIATED; (M5889)NABA MATRISOME	(M5953)HALLMARK KRAS SIGNALING UP	1.0	1.0	0.0	0.0	0.0	1.0	0.0	0.0	0.0	0.0	1.0	0.0	0.0	0.0	0.0	0.0	0.0	0.0	0.0	1.0
TLR1	7096	symbol	H. sapiens	7096	H. sapiens	TLR1	toll like receptor 1	GO:0034130 toll-like receptor 1 signaling pathway;GO:0042495 detection of triacyl bacterial lipopeptide;GO:0071725 response to triacyl bacterial lipopeptide		Predicted intracellular proteins; Enzymes; ENZYME proteins:Hydrolases; CD markers			(M264)PID TOLL ENDOGENOUS PATHWAY	(M5932)HALLMARK INFLAMMATORY RESPONSE; (M5950)HALLMARK ALLOGRAFT REJECTION	0.0	0.0	1.0	1.0	0.0	1.0	1.0	1.0	0.0	0.0	1.0	0.0	0.0	0.0	0.0	0.0	0.0	0.0	0.0	0.0
DOK2	9046	symbol	H. sapiens	9046	H. sapiens	DOK2	docking protein 2	GO:0007265 Ras protein signal transduction;GO:0007264 small GTPase mediated signal transduction;GO:0007169 transmembrane receptor protein tyrosine kinase signaling pathway		Predicted intracellular proteins	Cytosol (Approved); Additional: Golgi apparatus;Nuclear bodies;Nucleoplasm		(M92)PID ANGIOPOIETIN RECEPTOR PATHWAY; (M122)PID IL2 1PATHWAY; (M28)PID IL4 2PATHWAY		0.0	0.0	0.0	0.0	0.0	0.0	0.0	0.0	0.0	0.0	0.0	0.0	0.0	0.0	0.0	0.0	0.0	0.0	0.0	0.0
CTA-392E5.1						None	None	None	None	None	None	None	None	None	nan	nan	nan	nan	nan	nan	nan	nan	nan	nan	nan	nan	nan	nan	nan	nan	nan	nan	nan	nan
BCL2A1	597	symbol	H. sapiens	597	H. sapiens	BCL2A1	BCL2 related protein A1	GO:0038034 signal transduction in absence of ligand;GO:0097192 extrinsic apoptotic signaling pathway in absence of ligand;GO:0008630 intrinsic apoptotic signaling pathway in response to DNA damage		Predicted intracellular proteins; Cancer-related genes:Candidate cancer biomarkers			(M10)PID BCR 5PATHWAY; (M145)PID P53 DOWNSTREAM PATHWAY	(M5890)HALLMARK TNFA SIGNALING VIA NFKB	0.0	0.0	0.0	0.0	0.0	0.0	0.0	0.0	0.0	0.0	0.0	0.0	0.0	0.0	0.0	0.0	0.0	0.0	0.0	0.0
CTC-573N18.1						None	None	None	None	None	None	None	None	None	nan	nan	nan	nan	nan	nan	nan	nan	nan	nan	nan	nan	nan	nan	nan	nan	nan	nan	nan	nan
SBSN	374897	symbol	H. sapiens	374897	H. sapiens	SBSN	suprabasin	GO:0008150 biological_process		Predicted intracellular proteins; Predicted secreted proteins	Vesicles (Approved)				0.0	0.0	0.0	0.0	0.0	0.0	0.0	0.0	0.0	0.0	0.0	0.0	0.0	0.0	0.0	0.0	0.0	0.0	0.0	0.0
LAT2	7462	symbol	H. sapiens	7462	H. sapiens	LAT2	linker for activation of T cells family member 2	GO:0002279 mast cell activation involved in immune response;GO:0043303 mast cell degranulation;GO:0002448 mast cell mediated immunity		Disease related genes; Predicted intracellular proteins; Human disease related genes:Other congenital disorders:Chromosomal abnormalities	Plasma membrane (Supported)		(M7)PID FCER1 PATHWAY	(M5953)HALLMARK KRAS SIGNALING UP	0.0	1.0	0.0	0.0	0.0	1.0	1.0	0.0	0.0	0.0	0.0	0.0	0.0	0.0	0.0	0.0	0.0	0.0	1.0	0.0
LAYN	143903	symbol	H. sapiens	143903	H. sapiens	LAYN	layilin			Predicted intracellular proteins	Cytosol (Approved)	Hyaluronic acid		(M5915)HALLMARK APICAL JUNCTION	0.0	0.0	0.0	0.0	0.0	0.0	0.0	0.0	0.0	0.0	0.0	0.0	0.0	0.0	0.0	0.0	0.0	0.0	0.0	0.0
KLK10	5655	symbol	H. sapiens	5655	H. sapiens	KLK10	kallikrein related peptidase 10	GO:0007049 cell cycle;GO:0006508 proteolysis;GO:0019538 protein metabolic process		Predicted secreted proteins; Peptidases:Serine-type peptidases; Enzymes; Cancer-related genes:Candidate cancer biomarkers				(M5906)HALLMARK ESTROGEN RESPONSE EARLY; (M5907)HALLMARK ESTROGEN RESPONSE LATE	0.0	0.0	0.0	0.0	0.0	0.0	0.0	0.0	0.0	0.0	0.0	0.0	0.0	0.0	0.0	0.0	0.0	0.0	0.0	0.0
AIF1	199	symbol	H. sapiens	199	H. sapiens	AIF1	allograft inflammatory factor 1	GO:0014739 positive regulation of muscle hyperplasia;GO:0014738 regulation of muscle hyperplasia;GO:0071673 positive regulation of smooth muscle cell chemotaxis		Predicted intracellular proteins	Cytosol (Uncertain)				0.0	0.0	1.0	0.0	1.0	1.0	0.0	0.0	1.0	1.0	1.0	1.0	0.0	0.0	0.0	0.0	0.0	0.0	0.0	0.0
FABP7	2173	symbol	H. sapiens	2173	H. sapiens	FABP7	fatty acid binding protein 7	GO:0015908 fatty acid transport;GO:0050673 epithelial cell proliferation;GO:0015849 organic acid transport		Predicted intracellular proteins	Nucleoplasm (Approved); Additional: Cytosol;Golgi apparatus				0.0	0.0	0.0	0.0	0.0	0.0	0.0	0.0	1.0	0.0	0.0	0.0	0.0	0.0	0.0	0.0	0.0	0.0	0.0	0.0
ROS1	6098	symbol	H. sapiens	6098	H. sapiens	ROS1	ROS proto-oncogene 1, receptor tyrosine kinase	GO:0002066 columnar/cuboidal epithelial cell development;GO:0002065 columnar/cuboidal epithelial cell differentiation;GO:0032006 regulation of TOR signaling	Tyr protein kinase family	Predicted intracellular proteins; Cancer-related genes; ENZYME proteins:Transferases; Disease related genes; Human disease related genes:Cancers:Cancers of the lung and pleura; Kinases:Tyr protein kinases; Enzymes; FDA approved drug targets:Small molecule drugs	Vesicles (Approved)	Entrectinib; Fostamatinib		(M5932)HALLMARK INFLAMMATORY RESPONSE	0.0	0.0	0.0	0.0	1.0	0.0	0.0	0.0	0.0	0.0	0.0	0.0	0.0	0.0	0.0	0.0	0.0	0.0	0.0	0.0
TBXAS1	6916	symbol	H. sapiens	6916	H. sapiens	TBXAS1	thromboxane A synthase 1	GO:0030320 cellular monovalent inorganic anion homeostasis;GO:0030644 cellular chloride ion homeostasis;GO:0019371 cyclooxygenase pathway		ENZYME proteins:Isomerase; Predicted intracellular proteins; Human disease related genes:Congenital malformations:Congenital malformations of the musculoskeletal system; ENZYME proteins:Lyases; Disease related genes; Enzymes	Cytosol;Endoplasmic reticulum (Approved)	Sulfasalazine; Ridogrel; Dazoxiben; NM-702			0.0	0.0	0.0	0.0	0.0	0.0	0.0	0.0	0.0	0.0	0.0	0.0	0.0	0.0	0.0	0.0	0.0	0.0	0.0	0.0
OSMR	9180	symbol	H. sapiens	9180	H. sapiens	OSMR	oncostatin M receptor	GO:0038165 oncostatin-M-mediated signaling pathway;GO:0048861 leukemia inhibitory factor signaling pathway;GO:0002675 positive regulation of acute inflammatory response		Disease related genes; Predicted intracellular proteins; Human disease related genes:Skin diseases:Skin and soft tissue diseases	Nucleoli (Approved)			(M5897)HALLMARK IL6 JAK STAT3 SIGNALING; (M5932)HALLMARK INFLAMMATORY RESPONSE	0.0	0.0	1.0	0.0	0.0	0.0	0.0	0.0	0.0	1.0	0.0	1.0	0.0	0.0	0.0	0.0	0.0	0.0	0.0	0.0
MSN	4478	symbol	H. sapiens	4478	H. sapiens	MSN	moesin	GO:0070489 T cell aggregation;GO:0022614 membrane to membrane docking;GO:0071593 lymphocyte aggregation		Disease related genes; Cancer-related genes:Mutational cancer driver genes; Predicted intracellular proteins	Plasma membrane (Enhanced)		(M41)PID ER NONGENOMIC PATHWAY; (M12)PID RHOA PATHWAY	(M5915)HALLMARK APICAL JUNCTION	0.0	0.0	1.0	1.0	1.0	1.0	0.0	0.0	0.0	0.0	0.0	0.0	0.0	0.0	0.0	0.0	0.0	1.0	0.0	0.0
CDIP1	29965	symbol	H. sapiens	29965	H. sapiens	CDIP1	cell death inducing p53 target 1	GO:0042771 intrinsic apoptotic signaling pathway in response to DNA damage by p53 class mediator;GO:0072332 intrinsic apoptotic signaling pathway by p53 class mediator;GO:0033209 tumor necrosis factor-mediated signaling pathway		Predicted intracellular proteins	Centrosome (Supported); Additional: Nucleoplasm				0.0	0.0	1.0	0.0	0.0	0.0	0.0	0.0	0.0	0.0	0.0	0.0	0.0	0.0	0.0	0.0	0.0	0.0	0.0	0.0
RP11-104E19.1						None	None	None	None	None	None	None	None	None	nan	nan	nan	nan	nan	nan	nan	nan	nan	nan	nan	nan	nan	nan	nan	nan	nan	nan	nan	nan
TNFAIP8L2	79626	symbol	H. sapiens	79626	H. sapiens	TNFAIP8L2	TNF alpha induced protein 8 like 2	GO:0050868 negative regulation of T cell activation;GO:1903038 negative regulation of leukocyte cell-cell adhesion;GO:0051250 negative regulation of lymphocyte activation		Predicted intracellular proteins	Vesicles (Approved)				0.0	0.0	0.0	0.0	0.0	0.0	0.0	0.0	1.0	0.0	0.0	1.0	0.0	0.0	0.0	0.0	0.0	0.0	0.0	0.0
RP11-297P16.4						None	None	None	None	None	None	None	None	None	nan	nan	nan	nan	nan	nan	nan	nan	nan	nan	nan	nan	nan	nan	nan	nan	nan	nan	nan	nan
ARHGAP9	64333	symbol	H. sapiens	64333	H. sapiens	ARHGAP9	Rho GTPase activating protein 9	GO:0051056 regulation of small GTPase mediated signal transduction;GO:0043087 regulation of GTPase activity;GO:0051336 regulation of hydrolase activity		Predicted intracellular proteins	Plasma membrane (Approved); Additional: Cell Junctions		(M241)PID RAC1 REG PATHWAY; (M68)PID RHOA REG PATHWAY		0.0	0.0	0.0	0.0	0.0	0.0	0.0	0.0	0.0	0.0	0.0	0.0	0.0	0.0	0.0	0.0	0.0	0.0	0.0	0.0
PLEK	5341	symbol	H. sapiens	5341	H. sapiens	PLEK	pleckstrin	GO:0010920 negative regulation of inositol phosphate biosynthetic process;GO:0010924 regulation of inositol-polyphosphate 5-phosphatase activity;GO:0010925 positive regulation of inositol-polyphosphate 5-phosphatase activity		Predicted intracellular proteins	Nucleoli (Approved)			(M5946)HALLMARK COAGULATION; (M5890)HALLMARK TNFA SIGNALING VIA NFKB; (M5921)HALLMARK COMPLEMENT	0.0	0.0	0.0	0.0	0.0	1.0	0.0	0.0	1.0	0.0	0.0	0.0	0.0	0.0	0.0	0.0	0.0	1.0	0.0	0.0
CMKLR1	1240	symbol	H. sapiens	1240	H. sapiens	CMKLR1	chemerin chemokine-like receptor 1	GO:0002430 complement receptor mediated signaling pathway;GO:0010759 positive regulation of macrophage chemotaxis;GO:0032695 negative regulation of interleukin-12 production		G-protein coupled receptors:GPCRs excl olfactory receptors; Transporters				(M5913)HALLMARK INTERFERON GAMMA RESPONSE; (M5932)HALLMARK INFLAMMATORY RESPONSE; (M5953)HALLMARK KRAS SIGNALING UP	0.0	0.0	1.0	0.0	0.0	0.0	1.0	0.0	0.0	1.0	0.0	0.0	1.0	0.0	0.0	0.0	0.0	0.0	0.0	0.0
WDFY4	57705	symbol	H. sapiens	57705	H. sapiens	WDFY4	WDFY family member 4	GO:0036037 CD8-positive, alpha-beta T cell activation;GO:0046631 alpha-beta T cell activation;GO:0098586 cellular response to virus		Predicted intracellular proteins	Nucleoplasm (Approved); Additional: Cytosol				0.0	0.0	0.0	0.0	0.0	1.0	0.0	0.0	0.0	0.0	0.0	0.0	0.0	0.0	0.0	0.0	0.0	0.0	0.0	0.0
AC004870.4						None	None	None	None	None	None	None	None	None	nan	nan	nan	nan	nan	nan	nan	nan	nan	nan	nan	nan	nan	nan	nan	nan	nan	nan	nan	nan
CREB5	9586	symbol	H. sapiens	9586	H. sapiens	CREB5	cAMP responsive element binding protein 5	GO:0045893 positive regulation of transcription, DNA-templated;GO:1903508 positive regulation of nucleic acid-templated transcription;GO:1902680 positive regulation of RNA biosynthetic process		Transcription factors:Basic domains; Predicted intracellular proteins	Nucleoplasm (Approved); Additional: Plasma membrane;Vesicles		(M295)SIG PIP3 SIGNALING IN CARDIAC MYOCTES		0.0	0.0	0.0	0.0	0.0	0.0	0.0	0.0	0.0	0.0	0.0	0.0	0.0	0.0	0.0	0.0	0.0	0.0	0.0	0.0
CD37	951	symbol	H. sapiens	951	H. sapiens	CD37	CD37 molecule			Predicted intracellular proteins; CD markers	Golgi apparatus (Approved); Additional: Plasma membrane			(M5953)HALLMARK KRAS SIGNALING UP	0.0	0.0	0.0	0.0	0.0	0.0	0.0	0.0	0.0	0.0	0.0	0.0	0.0	0.0	0.0	0.0	1.0	0.0	0.0	0.0
SPOCK2	9806	symbol	H. sapiens	9806	H. sapiens	SPOCK2	SPARC (osteonectin), cwcv and kazal like domains proteoglycan 2	GO:0019800 peptide cross-linking via chondroitin 4-sulfate glycosaminoglycan;GO:0030204 chondroitin sulfate metabolic process;GO:0050654 chondroitin sulfate proteoglycan metabolic process		Predicted secreted proteins			(M5882)NABA PROTEOGLYCANS; (M5884)NABA CORE MATRISOME; (M5889)NABA MATRISOME	(M5921)HALLMARK COMPLEMENT	0.0	0.0	1.0	0.0	0.0	0.0	0.0	0.0	1.0	0.0	0.0	0.0	0.0	0.0	0.0	0.0	0.0	0.0	0.0	0.0
P2RY13	53829	symbol	H. sapiens	53829	H. sapiens	P2RY13	purinergic receptor P2Y13	GO:0035589 G protein-coupled purinergic nucleotide receptor signaling pathway;GO:0007194 negative regulation of adenylate cyclase activity;GO:0031280 negative regulation of cyclase activity		G-protein coupled receptors:GPCRs excl olfactory receptors; G-protein coupled receptors:Adenosine and adenine nucleotide receptors					0.0	0.0	0.0	0.0	0.0	0.0	0.0	0.0	0.0	0.0	0.0	0.0	1.0	0.0	0.0	0.0	0.0	0.0	0.0	0.0
HAR1B	768097	symbol	H. sapiens	768097	H. sapiens	HAR1B	highly accelerated region 1B								0.0	0.0	0.0	0.0	0.0	0.0	0.0	0.0	0.0	0.0	0.0	0.0	0.0	0.0	0.0	0.0	0.0	0.0	0.0	0.0
CD209	30835	symbol	H. sapiens	30835	H. sapiens	CD209	CD209 molecule	GO:0097323 B cell adhesion;GO:0046968 peptide antigen transport;GO:0075733 intracellular transport of virus		Predicted intracellular proteins; CD markers			(M5880)NABA ECM AFFILIATED; (M5885)NABA MATRISOME ASSOCIATED; (M5889)NABA MATRISOME	(M5915)HALLMARK APICAL JUNCTION	1.0	1.0	0.0	0.0	0.0	0.0	0.0	1.0	1.0	0.0	0.0	0.0	0.0	0.0	0.0	0.0	0.0	1.0	0.0	1.0
MYBPH	4608	symbol	H. sapiens	4608	H. sapiens	MYBPH	myosin binding protein H	GO:0006942 regulation of striated muscle contraction;GO:0006937 regulation of muscle contraction;GO:0090257 regulation of muscle system process		Predicted intracellular proteins	Mitochondria;Nucleoplasm (Approved); Additional: Nucleoli			(M5909)HALLMARK MYOGENESIS	0.0	0.0	0.0	0.0	0.0	0.0	0.0	0.0	0.0	0.0	0.0	0.0	0.0	0.0	0.0	0.0	0.0	0.0	0.0	0.0
SASH3	54440	symbol	H. sapiens	54440	H. sapiens	SASH3	SAM and SH3 domain containing 3	GO:0032753 positive regulation of interleukin-4 production;GO:0002726 positive regulation of T cell cytokine production;GO:0048873 homeostasis of number of cells within a tissue		Predicted intracellular proteins	Plasma membrane (Approved); Additional: Nuclear bodies;Nucleoplasm				0.0	0.0	0.0	0.0	0.0	0.0	1.0	0.0	1.0	1.0	1.0	0.0	0.0	1.0	0.0	0.0	0.0	0.0	0.0	0.0
CYSLTR2	57105	symbol	H. sapiens	57105	H. sapiens	CYSLTR2	cysteinyl leukotriene receptor 2	GO:0061737 leukotriene signaling pathway;GO:0071377 cellular response to glucagon stimulus;GO:0033762 response to glucagon		G-protein coupled receptors:GPCRs excl olfactory receptors; Predicted intracellular proteins; FDA approved drug targets:Small molecule drugs		Nedocromil; Leukotriene C4; Leukotriene D4	(M8)PID ENDOTHELIN PATHWAY		0.0	0.0	0.0	0.0	0.0	0.0	0.0	0.0	0.0	0.0	0.0	0.0	1.0	0.0	0.0	0.0	0.0	0.0	0.0	0.0
CLDN2	9075	symbol	H. sapiens	9075	H. sapiens	CLDN2	claudin 2	GO:0016338 calcium-independent cell-cell adhesion via plasma membrane cell-adhesion molecules;GO:0070830 bicellular tight junction assembly;GO:0120192 tight junction assembly			Cell Junctions;Nucleoplasm (Supported)				0.0	0.0	0.0	0.0	0.0	0.0	0.0	0.0	0.0	0.0	0.0	0.0	0.0	0.0	0.0	0.0	0.0	1.0	0.0	0.0
PSTPIP1	9051	symbol	H. sapiens	9051	H. sapiens	PSTPIP1	proline-serine-threonine phosphatase interacting protein 1	GO:0030041 actin filament polymerization;GO:0008154 actin polymerization or depolymerization;GO:0051258 protein polymerization		Disease related genes; Human disease related genes:Immune system diseases:Other immune system diseases; Predicted intracellular proteins	Cytosol;Plasma membrane (Supported)				0.0	0.0	1.0	0.0	1.0	0.0	0.0	0.0	0.0	0.0	0.0	0.0	0.0	0.0	0.0	0.0	0.0	0.0	0.0	0.0
PIWIL1	9271	symbol	H. sapiens	9271	H. sapiens	PIWIL1	piwi like RNA-mediated gene silencing 1	GO:0035093 spermatogenesis, exchange of chromosomal proteins;GO:0035092 sperm DNA condensation;GO:0007289 spermatid nucleus differentiation		Disease related genes; Predicted intracellular proteins					0.0	0.0	0.0	0.0	0.0	0.0	0.0	0.0	0.0	0.0	0.0	0.0	0.0	0.0	0.0	0.0	0.0	0.0	0.0	0.0
CXCR2P1	3580	symbol	H. sapiens	3580	H. sapiens	CXCR2P1	C-X-C motif chemokine receptor 2 pseudogene 1								0.0	0.0	0.0	0.0	0.0	0.0	0.0	0.0	0.0	0.0	0.0	0.0	0.0	0.0	0.0	0.0	0.0	0.0	0.0	0.0
LILRB1	10859	symbol	H. sapiens	10859	H. sapiens	LILRB1	leukocyte immunoglobulin like receptor B1	GO:2001191 regulation of gamma-delta T cell activation involved in immune response;GO:2001193 positive regulation of gamma-delta T cell activation involved in immune response;GO:2001189 negative regulation of T cell activation via T cell receptor contact with antigen bound to MHC molecule on antigen presenting cell							0.0	1.0	1.0	1.0	0.0	1.0	1.0	1.0	1.0	1.0	1.0	1.0	0.0	1.0	0.0	0.0	0.0	0.0	0.0	0.0
NGFR	4804	symbol	H. sapiens	4804	H. sapiens	NGFR	nerve growth factor receptor	GO:0042488 positive regulation of odontogenesis of dentin-containing tooth;GO:0042482 positive regulation of odontogenesis;GO:0051799 negative regulation of hair follicle development		RAS pathway related proteins; Predicted intracellular proteins; Cancer-related genes:Candidate cancer biomarkers; CD markers	Nucleoplasm;Plasma membrane (Approved)		(M18895)SA TRKA RECEPTOR; (M187)PID TRKR PATHWAY; (M153)PID P75 NTR PATHWAY		0.0	0.0	1.0	0.0	1.0	0.0	0.0	0.0	1.0	0.0	0.0	0.0	0.0	0.0	0.0	0.0	0.0	0.0	0.0	0.0
DGKK	139189	symbol	H. sapiens	139189	H. sapiens	DGKK	diacylglycerol kinase kappa	GO:0046834 lipid phosphorylation;GO:0046339 diacylglycerol metabolic process;GO:0007205 protein kinase C-activating G protein-coupled receptor signaling pathway		ENZYME proteins:Transferases; Predicted intracellular proteins; Enzymes					0.0	0.0	0.0	0.0	0.0	1.0	0.0	0.0	0.0	0.0	0.0	0.0	1.0	0.0	0.0	0.0	0.0	0.0	0.0	0.0
LINC00948	100507027	gene_synonym	H. sapiens	100507027	H. sapiens	MRLN	myoregulin	GO:1902081 negative regulation of calcium ion import into sarcoplasmic reticulum;GO:1902080 regulation of calcium ion import into sarcoplasmic reticulum;GO:1901876 regulation of calcium ion binding		Predicted intracellular proteins; Transporters:Transporter channels and pores					0.0	0.0	0.0	0.0	0.0	0.0	0.0	0.0	0.0	0.0	0.0	0.0	0.0	0.0	0.0	0.0	0.0	0.0	0.0	0.0
CHIA	27159	symbol	H. sapiens	27159	H. sapiens	CHIA	chitinase acidic	GO:0044245 polysaccharide digestion;GO:0006030 chitin metabolic process;GO:0006032 chitin catabolic process		Predicted intracellular proteins; Enzymes; ENZYME proteins:Hydrolases					0.0	0.0	1.0	0.0	0.0	0.0	0.0	0.0	0.0	0.0	1.0	0.0	0.0	0.0	0.0	0.0	0.0	0.0	0.0	0.0
BTK	695	symbol	H. sapiens	695	H. sapiens	BTK	Bruton tyrosine kinase	GO:0001803 regulation of type III hypersensitivity;GO:0001805 positive regulation of type III hypersensitivity;GO:0001812 positive regulation of type I hypersensitivity	Tyr protein kinase family	Predicted intracellular proteins; Human disease related genes:Endocrine and metabolic diseases:Hypothalamus and pituitary gland diseases; Cancer-related genes; ENZYME proteins:Transferases; Disease related genes; Kinases:Tyr protein kinases; Human disease related genes:Immune system diseases:Primary immunodeficiency; Enzymes; FDA approved drug targets:Small molecule drugs	Cytosol;Plasma membrane (Supported)	Dasatinib; Inositol 1,3,4,5-Tetrakisphosphate; XL418; Ibrutinib; Acalabrutinib; Fostamatinib; Zanubrutinib	(M233)PID EPO PATHWAY; (M1315)SIG PIP3 SIGNALING IN B LYMPHOCYTES; (M94)PID FAS PATHWAY		0.0	1.0	1.0	1.0	0.0	1.0	1.0	1.0	1.0	1.0	0.0	1.0	1.0	1.0	0.0	0.0	0.0	0.0	1.0	0.0
CEACAM21	90273	symbol	H. sapiens	90273	H. sapiens	CEACAM21	CEA cell adhesion molecule 21								0.0	0.0	0.0	0.0	0.0	0.0	0.0	0.0	0.0	0.0	0.0	0.0	0.0	0.0	0.0	0.0	0.0	0.0	0.0	0.0
LRRC25	126364	symbol	H. sapiens	126364	H. sapiens	LRRC25	leucine rich repeat containing 25				Cytosol;Endoplasmic reticulum;Microtubules (Approved)				0.0	0.0	0.0	0.0	0.0	0.0	0.0	0.0	0.0	0.0	0.0	0.0	0.0	0.0	0.0	0.0	0.0	0.0	0.0	0.0
IL1RAP	3556	symbol	H. sapiens	3556	H. sapiens	IL1RAP	interleukin 1 receptor accessory protein	GO:0038172 interleukin-33-mediated signaling pathway;GO:0099545 trans-synaptic signaling by trans-synaptic complex;GO:0099151 regulation of postsynaptic density assembly		Predicted secreted proteins; Predicted intracellular proteins; Enzymes; ENZYME proteins:Hydrolases	Cytosol;Vesicles (Approved)		(M110)PID IL1 PATHWAY; (M19)PID P73PATHWAY		0.0	0.0	1.0	0.0	0.0	0.0	0.0	0.0	0.0	0.0	1.0	0.0	0.0	0.0	0.0	0.0	0.0	1.0	0.0	0.0
CD48	962	symbol	H. sapiens	962	H. sapiens	CD48	CD48 molecule	GO:0002819 regulation of adaptive immune response;GO:0042110 T cell activation;GO:0046649 lymphocyte activation		Predicted intracellular proteins; CD markers	Plasma membrane (Approved); Additional: Cytosol;Nucleoli fibrillar center			(M5947)HALLMARK IL2 STAT5 SIGNALING; (M5932)HALLMARK INFLAMMATORY RESPONSE	0.0	0.0	0.0	0.0	0.0	1.0	0.0	0.0	0.0	0.0	0.0	0.0	0.0	1.0	0.0	0.0	0.0	0.0	0.0	0.0
CXCL6	6372	symbol	H. sapiens	6372	H. sapiens	CXCL6	C-X-C motif chemokine ligand 6	GO:0070950 regulation of neutrophil mediated killing of bacterium;GO:0070951 regulation of neutrophil mediated killing of gram-negative bacterium;GO:0070949 regulation of neutrophil mediated killing of symbiont cell		Predicted secreted proteins			(M5883)NABA SECRETED FACTORS; (M5885)NABA MATRISOME ASSOCIATED; (M5889)NABA MATRISOME	(M5944)HALLMARK ANGIOGENESIS; (M5890)HALLMARK TNFA SIGNALING VIA NFKB; (M5930)HALLMARK EPITHELIAL MESENCHYMAL TRANSITION	1.0	0.0	1.0	1.0	0.0	1.0	0.0	0.0	0.0	1.0	0.0	1.0	1.0	1.0	1.0	0.0	0.0	0.0	0.0	0.0
MIR155HG	114614	symbol	H. sapiens	114614	H. sapiens	MIR155HG	MIR155 host gene	GO:0035195 miRNA-mediated gene silencing;GO:0035194 post-transcriptional gene silencing by RNA;GO:0016441 post-transcriptional gene silencing							0.0	0.0	0.0	0.0	0.0	0.0	0.0	0.0	0.0	0.0	0.0	0.0	0.0	0.0	0.0	0.0	0.0	0.0	0.0	0.0
FCER2	2208	symbol	H. sapiens	2208	H. sapiens	FCER2	Fc epsilon receptor II	GO:0051712 positive regulation of killing of cells of another organism;GO:0002925 positive regulation of humoral immune response mediated by circulating immunoglobulin;GO:0051709 regulation of killing of cells of another organism		Predicted intracellular proteins; Predicted secreted proteins; Cancer-related genes:Candidate cancer biomarkers; CD markers		Lumiliximab	(M28)PID IL4 2PATHWAY		0.0	0.0	1.0	0.0	0.0	0.0	1.0	0.0	0.0	1.0	0.0	0.0	0.0	1.0	0.0	0.0	1.0	0.0	0.0	0.0
LGALS7B	653499	symbol	H. sapiens	653499	H. sapiens	LGALS7B	galectin 7B	GO:2000562 negative regulation of CD4-positive, alpha-beta T cell proliferation;GO:2000561 regulation of CD4-positive, alpha-beta T cell proliferation;GO:0046642 negative regulation of alpha-beta T cell proliferation		Predicted intracellular proteins		Beta-D-Glucose; beta-D-Galactosamine			0.0	0.0	0.0	0.0	0.0	0.0	0.0	0.0	1.0	0.0	0.0	0.0	0.0	0.0	0.0	0.0	0.0	1.0	0.0	0.0
C5AR2	27202	symbol	H. sapiens	27202	H. sapiens	C5AR2	complement C5a receptor 2	GO:0038178 complement component C5a signaling pathway;GO:0071623 negative regulation of granulocyte chemotaxis;GO:0090024 negative regulation of neutrophil chemotaxis		G-protein coupled receptors:Chemokines and chemotactic factors receptors; G-protein coupled receptors:GPCRs excl olfactory receptors					0.0	0.0	1.0	0.0	0.0	0.0	1.0	0.0	1.0	0.0	1.0	1.0	1.0	0.0	0.0	0.0	0.0	0.0	1.0	0.0
KLK11	11012	symbol	H. sapiens	11012	H. sapiens	KLK11	kallikrein related peptidase 11	GO:0006508 proteolysis;GO:0019538 protein metabolic process;GO:1901564 organonitrogen compound metabolic process		Peptidases:Serine-type peptidases; Enzymes; Predicted secreted proteins; Predicted intracellular proteins; Cancer-related genes:Candidate cancer biomarkers				(M5907)HALLMARK ESTROGEN RESPONSE LATE	0.0	0.0	0.0	0.0	0.0	0.0	0.0	0.0	0.0	0.0	0.0	0.0	0.0	0.0	0.0	0.0	0.0	0.0	0.0	0.0
IL21R	50615	symbol	H. sapiens	50615	H. sapiens	IL21R	interleukin 21 receptor	GO:0038114 interleukin-21-mediated signaling pathway;GO:0098756 response to interleukin-21;GO:0098757 cellular response to interleukin-21		Disease related genes; Cancer-related genes; CD markers	Cytosol;Plasma membrane (Uncertain)				0.0	1.0	1.0	0.0	0.0	1.0	0.0	0.0	0.0	0.0	0.0	0.0	0.0	0.0	0.0	0.0	0.0	0.0	1.0	0.0
SDR16C5	195814	symbol	H. sapiens	195814	H. sapiens	SDR16C5	short chain dehydrogenase/reductase family 16C member 5	GO:0043616 keratinocyte proliferation;GO:0035067 negative regulation of histone acetylation;GO:0042574 retinal metabolic process		ENZYME proteins:Oxidoreductases; Enzymes					0.0	0.0	0.0	0.0	0.0	0.0	0.0	0.0	0.0	0.0	0.0	0.0	0.0	0.0	0.0	0.0	0.0	0.0	0.0	0.0
GPR97	222487	gene_synonym	H. sapiens	222487	H. sapiens	ADGRG3	adhesion G protein-coupled receptor G3	GO:0032792 negative regulation of CREB transcription factor activity;GO:1901223 negative regulation of NIK/NF-kappaB signaling;GO:1901222 regulation of NIK/NF-kappaB signaling		G-protein coupled receptors:GPCRs excl olfactory receptors; G-protein coupled receptors:Family 2 (B) receptors					0.0	0.0	0.0	0.0	0.0	1.0	0.0	0.0	0.0	0.0	0.0	0.0	0.0	0.0	0.0	0.0	0.0	0.0	0.0	0.0
CASP1	834	symbol	H. sapiens	834	H. sapiens	CASP1	caspase 1	GO:0140447 cytokine precursor processing;GO:0007231 osmosensory signaling pathway;GO:1903265 positive regulation of tumor necrosis factor-mediated signaling pathway		ENZYME proteins:Hydrolases; Enzymes; Peptidases:Cysteine-type peptidases; Predicted intracellular proteins; Cancer-related genes:Candidate cancer biomarkers	Cytosol (Supported); Additional: Nucleoplasm	Acetylsalicylic acid; Minocycline; Pralnacasan; LAX-101; Emricasan; VX-765; 1-METHYL-3-TRIFLUOROMETHYL-1H-THIENO[2,3-C]PYRAZOLE-5-CARBOXYLIC ACID (2-MERCAPTO-ETHYL)-AMIDE; Z-Val-Ala-Asp fluoromethyl ketone; 3-{6-[(8-HYDROXY-QUINOLINE-2-CARBONYL)-AMINO]-2-THIOPHEN-2-YL-HEXANOYLAMINO}-4-OXO-BUTYRI ACID	(M267)PID ANTHRAX PATHWAY; (M110)PID IL1 PATHWAY; (M161)PID IFNG PATHWAY	(M5911)HALLMARK INTERFERON ALPHA RESPONSE; (M5902)HALLMARK APOPTOSIS; (M5913)HALLMARK INTERFERON GAMMA RESPONSE	0.0	0.0	1.0	1.0	0.0	0.0	1.0	0.0	0.0	1.0	1.0	1.0	0.0	0.0	0.0	0.0	0.0	0.0	0.0	0.0
TNFRSF18	8784	symbol	H. sapiens	8784	H. sapiens	TNFRSF18	TNF receptor superfamily member 18	GO:0033209 tumor necrosis factor-mediated signaling pathway;GO:0042531 positive regulation of tyrosine phosphorylation of STAT protein;GO:0042509 regulation of tyrosine phosphorylation of STAT protein		Predicted secreted proteins; CD markers			(M272)PID CD8 TCR DOWNSTREAM PATHWAY	(M5947)HALLMARK IL2 STAT5 SIGNALING	0.0	0.0	1.0	0.0	0.0	0.0	0.0	0.0	1.0	0.0	0.0	0.0	0.0	0.0	0.0	0.0	0.0	0.0	0.0	0.0
RP1-272L16.1						None	None	None	None	None	None	None	None	None	nan	nan	nan	nan	nan	nan	nan	nan	nan	nan	nan	nan	nan	nan	nan	nan	nan	nan	nan	nan
TTR	7276	symbol	H. sapiens	7276	H. sapiens	TTR	transthyretin	GO:0070327 thyroid hormone transport;GO:0006144 purine nucleobase metabolic process;GO:0009112 nucleobase metabolic process		Human disease related genes:Nervous system diseases:Neurodegenerative diseases; Human disease related genes:Nervous system diseases:Other nervous and sensory system diseases; Predicted secreted proteins; Disease related genes; Cancer-related genes:Candidate cancer biomarkers; Predicted intracellular proteins; FDA approved drug targets:Small molecule drugs	Golgi apparatus (Approved)	Zinc; Copper; Tafamidis; Zinc acetate; Zinc chloride; Zinc sulfate, unspecified form	(M106)PID HNF3B PATHWAY	(M5949)HALLMARK PEROXISOME; (M5948)HALLMARK BILE ACID METABOLISM	0.0	0.0	0.0	0.0	0.0	0.0	0.0	0.0	0.0	0.0	0.0	0.0	0.0	0.0	0.0	0.0	0.0	0.0	0.0	0.0
HCST	10870	symbol	H. sapiens	10870	H. sapiens	HCST	hematopoietic cell signal transducer	GO:0014068 positive regulation of phosphatidylinositol 3-kinase signaling;GO:0014066 regulation of phosphatidylinositol 3-kinase signaling;GO:0006468 protein phosphorylation			Golgi apparatus;Plasma membrane (Supported); Additional: Vesicles				0.0	0.0	0.0	0.0	0.0	0.0	0.0	1.0	0.0	0.0	0.0	0.0	0.0	0.0	0.0	0.0	0.0	0.0	0.0	0.0
SIRPA	140885	symbol	H. sapiens	140885	H. sapiens	SIRPA	signal regulatory protein alpha	GO:1903720 negative regulation of I-kappaB phosphorylation;GO:0071641 negative regulation of macrophage inflammatory protein 1 alpha production;GO:0035696 monocyte extravasation		CD markers				(M5915)HALLMARK APICAL JUNCTION	0.0	0.0	1.0	1.0	0.0	0.0	0.0	0.0	1.0	0.0	1.0	1.0	0.0	0.0	0.0	0.0	0.0	1.0	0.0	0.0
CD4	920	symbol	H. sapiens	920	H. sapiens	CD4	CD4 molecule	GO:0035397 helper T cell enhancement of adaptive immune response;GO:0035723 interleukin-15-mediated signaling pathway;GO:0071350 cellular response to interleukin-15		Transporters:Accessory Factors Involved in Transport; Predicted intracellular proteins; FDA approved drug targets:Biotech drugs; CD markers	Plasma membrane (Approved)	Antithymocyte immunoglobulin (rabbit); Clenoliximab; Ibalizumab	(M243)PID ARF 3PATHWAY; (M290)PID IL12 STAT4 PATHWAY; (M196)PID IL23 PATHWAY	(M5950)HALLMARK ALLOGRAFT REJECTION	0.0	1.0	1.0	1.0	0.0	1.0	1.0	1.0	1.0	0.0	1.0	0.0	0.0	1.0	0.0	0.0	1.0	0.0	0.0	0.0
GPR114	221188	gene_synonym	H. sapiens	221188	H. sapiens	ADGRG5	adhesion G protein-coupled receptor G5	GO:0007189 adenylate cyclase-activating G protein-coupled receptor signaling pathway;GO:0007188 adenylate cyclase-modulating G protein-coupled receptor signaling pathway;GO:0007186 G protein-coupled receptor signaling pathway		G-protein coupled receptors:GPCRs excl olfactory receptors; G-protein coupled receptors:Family 2 (B) receptors; Predicted intracellular proteins	Nuclear membrane;Vesicles (Approved); Additional: Nucleoplasm				0.0	0.0	0.0	0.0	0.0	0.0	0.0	0.0	0.0	0.0	0.0	0.0	0.0	0.0	0.0	0.0	0.0	0.0	0.0	0.0
CORO1A	11151	symbol	H. sapiens	11151	H. sapiens	CORO1A	coronin 1A	GO:0032796 uropod organization;GO:0061502 early endosome to recycling endosome transport;GO:0031339 negative regulation of vesicle fusion		Disease related genes; Human disease related genes:Immune system diseases:Primary immunodeficiency; Predicted intracellular proteins	Cytosol (Approved)			(M5924)HALLMARK MTORC1 SIGNALING	0.0	0.0	1.0	0.0	1.0	1.0	0.0	0.0	1.0	0.0	0.0	0.0	0.0	0.0	0.0	0.0	0.0	0.0	1.0	0.0
APCDD1L	164284	symbol	H. sapiens	164284	H. sapiens	APCDD1L	APC down-regulated 1 like	GO:0030178 negative regulation of Wnt signaling pathway;GO:0030111 regulation of Wnt signaling pathway;GO:0009968 negative regulation of signal transduction		Predicted intracellular proteins	Mitochondria (Uncertain)				0.0	0.0	0.0	0.0	0.0	0.0	0.0	0.0	0.0	0.0	0.0	0.0	0.0	0.0	0.0	0.0	0.0	0.0	0.0	0.0
RP11-445P17.8						None	None	None	None	None	None	None	None	None	nan	nan	nan	nan	nan	nan	nan	nan	nan	nan	nan	nan	nan	nan	nan	nan	nan	nan	nan	nan
FKSG48						None	None	None	None	None	None	None	None	None	nan	nan	nan	nan	nan	nan	nan	nan	nan	nan	nan	nan	nan	nan	nan	nan	nan	nan	nan	nan
RPSAP52	204010	symbol	H. sapiens	204010	H. sapiens	RPSAP52	ribosomal protein SA pseudogene 52								0.0	0.0	0.0	0.0	0.0	0.0	0.0	0.0	0.0	0.0	0.0	0.0	0.0	0.0	0.0	0.0	0.0	0.0	0.0	0.0
KRT1	3848	symbol	H. sapiens	3848	H. sapiens	KRT1	keratin 1	GO:0001867 complement activation, lectin pathway;GO:0051290 protein heterotetramerization;GO:0042730 fibrinolysis		Disease related genes; Human disease related genes:Congenital malformations:Congenital malformations of skin; Predicted intracellular proteins		Zinc; Copper; Zinc acetate	(M223)PID BETA CATENIN NUC PATHWAY	(M5950)HALLMARK ALLOGRAFT REJECTION; (M5956)HALLMARK KRAS SIGNALING DN	0.0	0.0	0.0	0.0	1.0	1.0	1.0	0.0	0.0	0.0	0.0	1.0	0.0	0.0	1.0	0.0	0.0	0.0	1.0	0.0
NCKAP1L	3071	symbol	H. sapiens	3071	H. sapiens	NCKAP1L	NCK associated protein 1 like	GO:0043317 regulation of cytotoxic T cell degranulation;GO:0043318 negative regulation of cytotoxic T cell degranulation;GO:0043378 positive regulation of CD8-positive, alpha-beta T cell differentiation			Cytosol (Uncertain); Additional: Plasma membrane				0.0	0.0	1.0	0.0	0.0	1.0	1.0	0.0	1.0	1.0	1.0	0.0	0.0	1.0	0.0	0.0	0.0	0.0	0.0	0.0
LAMC2	3918	symbol	H. sapiens	3918	H. sapiens	LAMC2	laminin subunit gamma 2	GO:0008045 motor neuron axon guidance;GO:0016358 dendrite development;GO:0007411 axon guidance		Disease related genes; Human disease related genes:Congenital malformations:Congenital malformations of skin; Predicted secreted proteins	Endoplasmic reticulum;Golgi apparatus (Uncertain)		(M158)PID INTEGRIN4 PATHWAY; (M5887)NABA BASEMENT MEMBRANES; (M239)PID A6B1 A6B4 INTEGRIN PATHWAY	(M5907)HALLMARK ESTROGEN RESPONSE LATE; (M5915)HALLMARK APICAL JUNCTION; (M5930)HALLMARK EPITHELIAL MESENCHYMAL TRANSITION	0.0	0.0	1.0	0.0	1.0	0.0	0.0	0.0	0.0	0.0	0.0	0.0	0.0	0.0	0.0	0.0	0.0	0.0	0.0	0.0
TAC3	6866	symbol	H. sapiens	6866	H. sapiens	TAC3	tachykinin precursor 3	GO:0007217 tachykinin receptor signaling pathway;GO:0045777 positive regulation of blood pressure;GO:0007218 neuropeptide signaling pathway		Disease related genes; Predicted secreted proteins; Human disease related genes:Endocrine and metabolic diseases:Hypothalamus and pituitary gland diseases	Vesicles (Approved)	Copper			0.0	0.0	0.0	0.0	0.0	0.0	0.0	0.0	0.0	0.0	0.0	0.0	1.0	0.0	0.0	0.0	0.0	0.0	0.0	0.0
RP11-47I22.2						None	None	None	None	None	None	None	None	None	nan	nan	nan	nan	nan	nan	nan	nan	nan	nan	nan	nan	nan	nan	nan	nan	nan	nan	nan	nan
QRFPR	84109	symbol	H. sapiens	84109	H. sapiens	QRFPR	pyroglutamylated RFamide peptide receptor	GO:0007218 neuropeptide signaling pathway;GO:0007186 G protein-coupled receptor signaling pathway;GO:0007165 signal transduction		G-protein coupled receptors:GPCRs excl olfactory receptors					0.0	0.0	0.0	0.0	0.0	0.0	0.0	0.0	0.0	0.0	0.0	0.0	1.0	0.0	0.0	0.0	0.0	0.0	0.0	0.0
CDH13	1012	symbol	H. sapiens	1012	H. sapiens	CDH13	cadherin 13	GO:0055095 lipoprotein particle mediated signaling;GO:0055096 low-density lipoprotein particle mediated signaling;GO:0043616 keratinocyte proliferation		Predicted intracellular proteins	Plasma membrane (Supported)			(M5909)HALLMARK MYOGENESIS; (M5921)HALLMARK COMPLEMENT; (M5939)HALLMARK P53 PATHWAY	0.0	0.0	0.0	0.0	0.0	0.0	0.0	0.0	1.0	1.0	0.0	0.0	0.0	0.0	0.0	0.0	0.0	1.0	0.0	0.0
POU2AF1	5450	symbol	H. sapiens	5450	H. sapiens	POU2AF1	POU class 2 homeobox associating factor 1	GO:0002314 germinal center B cell differentiation;GO:0002313 mature B cell differentiation involved in immune response;GO:0002335 mature B cell differentiation		Disease related genes; Predicted intracellular proteins; Cancer-related genes:Mutated cancer genes					0.0	0.0	0.0	0.0	0.0	1.0	0.0	0.0	0.0	0.0	1.0	0.0	0.0	0.0	1.0	0.0	0.0	0.0	0.0	0.0
SPI1	6688	symbol	H. sapiens	6688	H. sapiens	SPI1	Spi-1 proto-oncogene	GO:0044027 hypermethylation of CpG island;GO:0120186 negative regulation of protein localization to chromatin;GO:0043314 negative regulation of neutrophil degranulation		Transcription factors:Helix-turn-helix domains; Predicted intracellular proteins; Human disease related genes:Cancers:Cancers of haematopoietic and lymphoid tissues	Nucleoplasm (Supported)		(M254)PID MYC REPRESS PATHWAY; (M28)PID IL4 2PATHWAY; (M279)PID RB 1PATHWAY	(M5950)HALLMARK ALLOGRAFT REJECTION	0.0	0.0	1.0	1.0	0.0	1.0	1.0	0.0	1.0	1.0	0.0	1.0	0.0	1.0	0.0	0.0	0.0	0.0	0.0	0.0
SP140	11262	symbol	H. sapiens	11262	H. sapiens	SP140	SP140 nuclear body protein	GO:0006952 defense response;GO:0006357 regulation of transcription by RNA polymerase II;GO:0006950 response to stress		Transcription factors:alpha-Helices exposed by beta-structures; Predicted intracellular proteins	Nucleoli fibrillar center (Approved); Additional: Mitochondria				0.0	0.0	0.0	0.0	0.0	0.0	0.0	0.0	0.0	0.0	0.0	0.0	0.0	0.0	0.0	0.0	0.0	0.0	0.0	0.0
CSPG4	1464	symbol	H. sapiens	1464	H. sapiens	CSPG4	chondroitin sulfate proteoglycan 4	GO:0097178 ruffle assembly;GO:0006929 substrate-dependent cell migration;GO:0031529 ruffle organization			Plasma membrane (Enhanced); Additional: Nucleoplasm		(M18)PID INTEGRIN1 PATHWAY; (M5880)NABA ECM AFFILIATED; (M5885)NABA MATRISOME ASSOCIATED		1.0	0.0	0.0	0.0	0.0	0.0	0.0	0.0	0.0	0.0	0.0	0.0	0.0	0.0	0.0	0.0	0.0	0.0	0.0	1.0
CD8B	926	symbol	H. sapiens	926	H. sapiens	CD8B	CD8b molecule	GO:0050852 T cell receptor signaling pathway;GO:0050851 antigen receptor-mediated signaling pathway;GO:0002429 immune response-activating cell surface receptor signaling pathway		Predicted intracellular proteins; CD markers	Plasma membrane (Supported)		(M88)PID CD8 TCR PATHWAY; (M54)PID IL12 2PATHWAY; (M272)PID CD8 TCR DOWNSTREAM PATHWAY	(M5950)HALLMARK ALLOGRAFT REJECTION	0.0	1.0	1.0	0.0	0.0	1.0	1.0	1.0	0.0	0.0	0.0	0.0	0.0	0.0	0.0	0.0	1.0	0.0	0.0	0.0
DSG3	1830	symbol	H. sapiens	1830	H. sapiens	DSG3	desmoglein 3	GO:0007156 homophilic cell adhesion via plasma membrane adhesion molecules;GO:0098742 cell-cell adhesion via plasma-membrane adhesion molecules;GO:0098609 cell-cell adhesion							0.0	0.0	0.0	0.0	1.0	0.0	0.0	0.0	0.0	0.0	0.0	0.0	0.0	0.0	0.0	0.0	0.0	1.0	0.0	0.0
NTRK2	4915	symbol	H. sapiens	4915	H. sapiens	NTRK2	neurotrophic receptor tyrosine kinase 2	GO:0099540 trans-synaptic signaling by neuropeptide;GO:0099551 trans-synaptic signaling by neuropeptide, modulating synaptic transmission;GO:0099538 synaptic signaling via neuropeptide	Tyr protein kinase family	Human disease related genes:Nervous system diseases:Epilepsy; RAS pathway related proteins; ENZYME proteins:Transferases; Disease related genes; Human disease related genes:Cancers:Cancers of eye, brain, and central nervous system; Cancer-related genes:Candidate cancer biomarkers; Kinases:Tyr protein kinases; Enzymes; FDA approved drug targets:Small molecule drugs	Plasma membrane (Supported)	Amitriptyline; Esketamine; Entrectinib; Fostamatinib; Larotrectinib	(M142)PID AJDISS 2PATHWAY; (M100)PID SHP2 PATHWAY; (M187)PID TRKR PATHWAY		0.0	0.0	0.0	0.0	0.0	0.0	0.0	0.0	0.0	0.0	0.0	0.0	0.0	0.0	0.0	0.0	0.0	0.0	0.0	0.0
FOLR2	2350	symbol	H. sapiens	2350	H. sapiens	FOLR2	folate receptor beta	GO:0071231 cellular response to folic acid;GO:1904447 folate import across plasma membrane;GO:0098838 folate transmembrane transport		Predicted intracellular proteins; Predicted secreted proteins		Folic acid; Vintafolide			0.0	0.0	1.0	0.0	0.0	0.0	0.0	0.0	0.0	0.0	0.0	0.0	0.0	0.0	0.0	0.0	0.0	0.0	0.0	0.0
SPRR2E	6704	symbol	H. sapiens	6704	H. sapiens	SPRR2E	small proline rich protein 2E	GO:0018149 peptide cross-linking;GO:0031424 keratinization;GO:0030216 keratinocyte differentiation		Predicted intracellular proteins					0.0	0.0	0.0	0.0	1.0	0.0	0.0	0.0	0.0	0.0	0.0	0.0	0.0	0.0	0.0	0.0	0.0	0.0	0.0	0.0
KRT5	3852	symbol	H. sapiens	3852	H. sapiens	KRT5	keratin 5	GO:0045109 intermediate filament organization;GO:0031424 keratinization;GO:0045104 intermediate filament cytoskeleton organization		Disease related genes; Predicted intracellular proteins; Human disease related genes:Congenital malformations:Congenital malformations of skin; Human disease related genes:Skin diseases:Skin and soft tissue diseases	Intermediate filaments (Approved)	Zinc; Zinc acetate	(M236)PID DELTA NP63 PATHWAY; (M115)PID REG GR PATHWAY	(M5956)HALLMARK KRAS SIGNALING DN	0.0	0.0	0.0	0.0	1.0	0.0	0.0	0.0	0.0	0.0	0.0	0.0	0.0	0.0	0.0	0.0	0.0	0.0	0.0	0.0
RPS3AP5	439992	symbol	H. sapiens	439992	H. sapiens	RPS3AP5	RPS3A pseudogene 5								0.0	0.0	0.0	0.0	0.0	0.0	0.0	0.0	0.0	0.0	0.0	0.0	0.0	0.0	0.0	0.0	0.0	0.0	0.0	0.0
CGB5	93659	symbol	H. sapiens	93659	H. sapiens	CGB5	chorionic gonadotropin subunit beta 5			Predicted secreted proteins	Cytosol (Approved)				0.0	0.0	0.0	0.0	0.0	0.0	0.0	0.0	0.0	0.0	0.0	0.0	0.0	0.0	0.0	0.0	0.0	0.0	0.0	0.0
STAP1	26228	symbol	H. sapiens	26228	H. sapiens	STAP1	signal transducing adaptor family member 1	GO:1904140 negative regulation of microglial cell migration;GO:1902227 negative regulation of macrophage colony-stimulating factor signaling pathway;GO:1903976 negative regulation of glial cell migration		Predicted intracellular proteins	Nucleoplasm;Vesicles (Uncertain)		(M231)PID KIT PATHWAY		0.0	0.0	0.0	1.0	0.0	0.0	1.0	0.0	1.0	1.0	0.0	1.0	0.0	1.0	0.0	0.0	0.0	0.0	0.0	0.0
RASGRP4	115727	symbol	H. sapiens	115727	H. sapiens	RASGRP4	RAS guanyl releasing protein 4	GO:0007202 activation of phospholipase C activity;GO:0010863 positive regulation of phospholipase C activity;GO:1900274 regulation of phospholipase C activity		RAS pathway related proteins; Predicted intracellular proteins	Cytosol;Nucleoplasm (Supported); Additional: Plasma membrane		(M269)PID RAS PATHWAY		0.0	0.0	0.0	0.0	0.0	1.0	0.0	0.0	0.0	0.0	0.0	0.0	0.0	0.0	0.0	0.0	0.0	0.0	0.0	0.0
LINC00605	100131366	symbol	H. sapiens	100131366	H. sapiens	LINC00605	long intergenic non-protein coding RNA 605								0.0	0.0	0.0	0.0	0.0	0.0	0.0	0.0	0.0	0.0	0.0	0.0	0.0	0.0	0.0	0.0	0.0	0.0	0.0	0.0
CARD17	440068	symbol	H. sapiens	440068	H. sapiens	CARD17	caspase recruitment domain family member 17	GO:0032691 negative regulation of interleukin-1 beta production;GO:0032692 negative regulation of interleukin-1 production;GO:0032651 regulation of interleukin-1 beta production							0.0	0.0	0.0	1.0	0.0	0.0	0.0	0.0	0.0	0.0	1.0	0.0	0.0	0.0	0.0	0.0	0.0	0.0	0.0	0.0
SCIMP	388325	symbol	H. sapiens	388325	H. sapiens	SCIMP	SLP adaptor and CSK interacting membrane protein	GO:0038123 toll-like receptor TLR1:TLR2 signaling pathway;GO:0071226 cellular response to molecule of fungal origin;GO:0002238 response to molecule of fungal origin							0.0	0.0	0.0	1.0	0.0	0.0	1.0	0.0	0.0	1.0	1.0	0.0	0.0	1.0	0.0	0.0	0.0	0.0	0.0	0.0
SELL	6402	symbol	H. sapiens	6402	H. sapiens	SELL	selectin L	GO:0050901 leukocyte tethering or rolling;GO:0061756 leukocyte adhesion to vascular endothelial cell;GO:0016339 calcium-dependent cell-cell adhesion via plasma membrane cell adhesion molecules		Candidate cardiovascular disease genes; Predicted intracellular proteins; Cancer-related genes:Candidate cancer biomarkers; CD markers	Cytosol (Uncertain)		(M11736)SA MMP CYTOKINE CONNECTION	(M5911)HALLMARK INTERFERON ALPHA RESPONSE; (M5947)HALLMARK IL2 STAT5 SIGNALING; (M5932)HALLMARK INFLAMMATORY RESPONSE	0.0	0.0	1.0	0.0	0.0	0.0	0.0	1.0	0.0	0.0	0.0	0.0	0.0	0.0	0.0	1.0	0.0	1.0	0.0	0.0
CSF1R	1436	symbol	H. sapiens	1436	H. sapiens	CSF1R	colony stimulating factor 1 receptor	GO:0038145 macrophage colony-stimulating factor signaling pathway;GO:0120041 positive regulation of macrophage proliferation;GO:0061517 macrophage proliferation	Tyr protein kinase family	FDA approved drug targets:Small molecule drugs; Human disease related genes:Nervous system diseases:Neurodegenerative diseases; RAS pathway related proteins; Predicted intracellular proteins; ENZYME proteins:Transferases; CD markers; Disease related genes; Human disease related genes:Cancers:Cancers of the breast and female genital organs; Kinases:Tyr protein kinases; Enzymes; Cancer-related gene…	Plasma membrane;Vesicles (Supported)	Imatinib; Sunitinib; ABT-869; 5-CYANO-FURAN-2-CARBOXYLIC ACID [5-HYDROXYMETHYL-2-(4-METHYL-PIPERIDIN-1-YL)-PHENYL]-AMIDE; 6-CHLORO-3-(3-METHYLISOXAZOL-5-YL)-4-PHENYLQUINOLIN-2(1H)-ONE; Fostamatinib; Erdafitinib; Pexidartinib	(M91)PID TCPTP PATHWAY; (M50)PID PTP1B PATHWAY; (M160)PID AVB3 INTEGRIN PATHWAY		0.0	0.0	1.0	0.0	0.0	1.0	0.0	0.0	1.0	1.0	1.0	0.0	0.0	0.0	0.0	0.0	1.0	0.0	0.0	0.0
RP11-356J5.12						None	None	None	None	None	None	None	None	None	nan	nan	nan	nan	nan	nan	nan	nan	nan	nan	nan	nan	nan	nan	nan	nan	nan	nan	nan	nan
GGTA1P	2681	gene_synonym	H. sapiens	2681	H. sapiens	GGTA1	glycoprotein alpha-galactosyltransferase 1 (inactive)	GO:0033575 protein glycosylation at cell surface;GO:0033580 protein galactosylation at cell surface;GO:0042125 protein galactosylation		Predicted intracellular proteins					0.0	0.0	0.0	0.0	0.0	0.0	0.0	0.0	0.0	0.0	0.0	0.0	0.0	0.0	0.0	0.0	0.0	0.0	0.0	0.0
LINC01117	102724224	symbol	H. sapiens	102724224	H. sapiens	LINC01117	long intergenic non-protein coding RNA 1117								0.0	0.0	0.0	0.0	0.0	0.0	0.0	0.0	0.0	0.0	0.0	0.0	0.0	0.0	0.0	0.0	0.0	0.0	0.0	0.0
CLEC4G	339390	symbol	H. sapiens	339390	H. sapiens	CLEC4G	C-type lectin domain family 4 member G	GO:1903902 positive regulation of viral life cycle;GO:0002710 negative regulation of T cell mediated immunity;GO:0002823 negative regulation of adaptive immune response based on somatic recombination of immune receptors built from immunoglobulin superfamily domains		Predicted intracellular proteins			(M5880)NABA ECM AFFILIATED; (M5885)NABA MATRISOME ASSOCIATED; (M5889)NABA MATRISOME		1.0	0.0	0.0	0.0	0.0	0.0	0.0	1.0	1.0	0.0	0.0	0.0	0.0	1.0	0.0	0.0	0.0	0.0	0.0	1.0
AC010677.5						None	None	None	None	None	None	None	None	None	nan	nan	nan	nan	nan	nan	nan	nan	nan	nan	nan	nan	nan	nan	nan	nan	nan	nan	nan	nan
CD53	963	symbol	H. sapiens	963	H. sapiens	CD53	CD53 molecule	GO:1901741 positive regulation of myoblast fusion;GO:1901739 regulation of myoblast fusion;GO:0060143 positive regulation of syncytium formation by plasma membrane fusion		Transporters:Accessory Factors Involved in Transport; CD markers					0.0	0.0	0.0	0.0	0.0	0.0	0.0	0.0	0.0	0.0	0.0	0.0	0.0	0.0	0.0	0.0	0.0	0.0	0.0	0.0
WNT8B	7479	symbol	H. sapiens	7479	H. sapiens	WNT8B	Wnt family member 8B	GO:0048263 determination of dorsal identity;GO:0048262 determination of dorsal/ventral asymmetry;GO:0071300 cellular response to retinoic acid		Predicted secreted proteins			(M5883)NABA SECRETED FACTORS; (M5885)NABA MATRISOME ASSOCIATED; (M5889)NABA MATRISOME		1.0	0.0	0.0	1.0	0.0	0.0	0.0	0.0	0.0	0.0	0.0	0.0	1.0	0.0	0.0	0.0	0.0	0.0	0.0	0.0
PRKCQ	5588	symbol	H. sapiens	5588	H. sapiens	PRKCQ	protein kinase C theta	GO:2000569 regulation of T-helper 2 cell activation;GO:2000570 positive regulation of T-helper 2 cell activation;GO:2000318 positive regulation of T-helper 17 type immune response	AGC Ser/Thr protein kinase family	Predicted intracellular proteins; ENZYME proteins:Transferases; Human disease related genes:Endocrine and metabolic diseases:Diabetes; Cancer-related genes:Candidate cancer biomarkers; Kinases:AGC Ser/Thr protein kinases; Enzymes; FDA approved drug targets:Small molecule drugs	Centriolar satellite (Enhanced)	Staurosporine; Phosphonothreonine; Dexfosfoserine; Fostamatinib	(M60)PID NFAT TFPATHWAY; (M88)PID CD8 TCR PATHWAY; (M113)PID NFAT 3PATHWAY		0.0	0.0	1.0	0.0	0.0	0.0	1.0	1.0	1.0	0.0	1.0	0.0	1.0	1.0	0.0	0.0	0.0	0.0	0.0	0.0
MRC1	4360	symbol	H. sapiens	4360	H. sapiens	MRC1	mannose receptor C-type 1	GO:0071353 cellular response to interleukin-4;GO:0070670 response to interleukin-4;GO:0071346 cellular response to interferon-gamma		FDA approved drug targets:Small molecule drugs; CD markers		Technetium Tc-99m tilmanocept			0.0	0.0	1.0	1.0	0.0	0.0	0.0	1.0	0.0	0.0	0.0	0.0	0.0	0.0	0.0	0.0	0.0	0.0	0.0	0.0
CASP5	838	symbol	H. sapiens	838	H. sapiens	CASP5	caspase 5	GO:0021762 substantia nigra development;GO:0048857 neural nucleus development;GO:0071260 cellular response to mechanical stimulus		ENZYME proteins:Hydrolases; Enzymes; Peptidases:Cysteine-type peptidases; Predicted intracellular proteins; Cancer-related genes:Candidate cancer biomarkers				(M5921)HALLMARK COMPLEMENT	0.0	0.0	1.0	0.0	0.0	0.0	0.0	0.0	0.0	0.0	0.0	1.0	0.0	0.0	0.0	0.0	0.0	0.0	0.0	0.0
ZC3H12D	340152	symbol	H. sapiens	340152	H. sapiens	ZC3H12D	zinc finger CCCH-type containing 12D	GO:0061158 3'-UTR-mediated mRNA destabilization;GO:0061157 mRNA destabilization;GO:0050779 RNA destabilization		Disease related genes; Predicted intracellular proteins	Cytoplasmic bodies;Nucleoplasm (Supported)				0.0	0.0	0.0	0.0	0.0	0.0	0.0	0.0	0.0	0.0	0.0	0.0	0.0	0.0	0.0	0.0	0.0	0.0	0.0	0.0
RP11-546K22.1						None	None	None	None	None	None	None	None	None	nan	nan	nan	nan	nan	nan	nan	nan	nan	nan	nan	nan	nan	nan	nan	nan	nan	nan	nan	nan
RP11-206M11.7						None	None	None	None	None	None	None	None	None	nan	nan	nan	nan	nan	nan	nan	nan	nan	nan	nan	nan	nan	nan	nan	nan	nan	nan	nan	nan
STAC2	342667	symbol	H. sapiens	342667	H. sapiens	STAC2	SH3 and cysteine rich domain 2	GO:1901387 positive regulation of voltage-gated calcium channel activity;GO:0003009 skeletal muscle contraction;GO:0050879 multicellular organismal movement		Predicted intracellular proteins	Cytosol (Approved)				0.0	0.0	0.0	0.0	0.0	0.0	0.0	0.0	0.0	0.0	0.0	0.0	0.0	0.0	0.0	0.0	0.0	0.0	0.0	0.0
GPR65	8477	symbol	H. sapiens	8477	H. sapiens	GPR65	G protein-coupled receptor 65	GO:0010447 response to acidic pH;GO:0051482 positive regulation of cytosolic calcium ion concentration involved in phospholipase C-activating G protein-coupled signaling pathway;GO:0035025 positive regulation of Rho protein signal transduction		G-protein coupled receptors:GPCRs excl olfactory receptors; G-protein coupled receptors:Lysolipids receptors	Vesicles (Approved); Additional: Cytosol;Nucleoli			(M5947)HALLMARK IL2 STAT5 SIGNALING; (M5950)HALLMARK ALLOGRAFT REJECTION	0.0	0.0	0.0	0.0	0.0	0.0	0.0	0.0	0.0	0.0	0.0	0.0	1.0	0.0	0.0	0.0	0.0	0.0	0.0	0.0
SEC16B	89866	symbol	H. sapiens	89866	H. sapiens	SEC16B	SEC16 homolog B, endoplasmic reticulum export factor	GO:0070973 protein localization to endoplasmic reticulum exit site;GO:0016559 peroxisome fission;GO:0070863 positive regulation of protein exit from endoplasmic reticulum		Predicted intracellular proteins	Endoplasmic reticulum;Plasma membrane (Approved); Additional: Actin filaments				0.0	0.0	0.0	0.0	0.0	0.0	0.0	0.0	0.0	0.0	0.0	0.0	0.0	0.0	0.0	0.0	0.0	0.0	0.0	0.0
AMICA1	120425	gene_synonym	H. sapiens	120425	H. sapiens	JAML	junction adhesion molecule like	GO:0035696 monocyte extravasation;GO:0072672 neutrophil extravasation;GO:0060054 positive regulation of epithelial cell proliferation involved in wound healing		Predicted intracellular proteins	Plasma membrane (Supported); Additional: Nucleoplasm		(M277)PID INTEGRIN A4B1 PATHWAY		0.0	0.0	1.0	0.0	0.0	1.0	0.0	1.0	0.0	0.0	0.0	0.0	0.0	0.0	0.0	0.0	0.0	1.0	0.0	0.0
DBH-AS1	138948	symbol	H. sapiens	138948	H. sapiens	DBH-AS1	DBH antisense RNA 1								0.0	0.0	0.0	0.0	0.0	0.0	0.0	0.0	0.0	0.0	0.0	0.0	0.0	0.0	0.0	0.0	0.0	0.0	0.0	0.0
ERBB2	2064	symbol	H. sapiens	2064	H. sapiens	ERBB2	erb-b2 receptor tyrosine kinase 2	GO:0033087 negative regulation of immature T cell proliferation;GO:0033088 negative regulation of immature T cell proliferation in thymus;GO:0033085 negative regulation of T cell differentiation in thymus	Tyr protein kinase family	FDA approved drug targets:Small molecule drugs; Predicted intracellular proteins; Human disease related genes:Cancers:Head and neck cancers; ENZYME proteins:Transferases; Human disease related genes:Cancers:Cancers of the digestive system; Cancer-related genes:Mutated cancer genes; Disease related genes; CD markers; Human disease related genes:Cancers:Cancers of the breast and female genital orga…	Plasma membrane (Enhanced); Additional: Cytosol	Trastuzumab; Lapatinib; IGN311; Trastuzumab emtansine; Varlitinib; AV-412; Pertuzumab; Afatinib; Tucatinib; Tesevatinib; Fostamatinib; Brigatinib; Zanubrutinib	(M201)PID ERBB NETWORK PATHWAY; (M13)PID ERBB4 PATHWAY; (M175)PID ERBB2 ERBB3 PATHWAY	(M5942)HALLMARK UV RESPONSE DN; (M5902)HALLMARK APOPTOSIS	0.0	0.0	1.0	0.0	0.0	0.0	0.0	0.0	1.0	0.0	0.0	0.0	0.0	0.0	0.0	0.0	0.0	0.0	0.0	0.0
RGS18	64407	symbol	H. sapiens	64407	H. sapiens	RGS18	regulator of G protein signaling 18	GO:0008277 regulation of G protein-coupled receptor signaling pathway;GO:0007186 G protein-coupled receptor signaling pathway;GO:0009968 negative regulation of signal transduction		Predicted intracellular proteins	Golgi apparatus (Approved)				0.0	0.0	0.0	0.0	0.0	0.0	0.0	0.0	0.0	0.0	0.0	0.0	1.0	0.0	0.0	0.0	0.0	0.0	0.0	0.0
RP5-1031D4.3						None	None	None	None	None	None	None	None	None	nan	nan	nan	nan	nan	nan	nan	nan	nan	nan	nan	nan	nan	nan	nan	nan	nan	nan	nan	nan
FYB	2533	gene_synonym	H. sapiens	2533	H. sapiens	FYB1	FYN binding protein 1	GO:0007229 integrin-mediated signaling pathway;GO:0050852 T cell receptor signaling pathway;GO:0072659 protein localization to plasma membrane		Disease related genes; Predicted intracellular proteins; Human disease related genes:Cardiovascular diseases:Hematologic diseases	Plasma membrane (Approved); Additional: Nucleoplasm		(M34)PID TCR PATHWAY	(M5915)HALLMARK APICAL JUNCTION; (M5950)HALLMARK ALLOGRAFT REJECTION	0.0	0.0	0.0	0.0	0.0	0.0	1.0	1.0	0.0	0.0	0.0	0.0	0.0	0.0	0.0	0.0	0.0	0.0	0.0	0.0
GCNT3	9245	symbol	H. sapiens	9245	H. sapiens	GCNT3	glucosaminyl (N-acetyl) transferase 3, mucin type	GO:0050892 intestinal absorption;GO:0016266 O-glycan processing;GO:0022600 digestive system process		ENZYME proteins:Transferases; Enzymes	Golgi apparatus (Approved); Additional: Vesicles				0.0	0.0	0.0	0.0	0.0	0.0	0.0	0.0	0.0	0.0	0.0	0.0	0.0	0.0	0.0	0.0	0.0	0.0	0.0	1.0
MAP4K1	11184	symbol	H. sapiens	11184	H. sapiens	MAP4K1	mitogen-activated protein kinase kinase kinase kinase 1	GO:1904627 response to phorbol 13-acetate 12-myristate;GO:1904628 cellular response to phorbol 13-acetate 12-myristate;GO:0007254 JNK cascade	STE Ser/Thr protein kinase family	ENZYME proteins:Transferases; Predicted intracellular proteins; Kinases:STE Ser/Thr protein kinases; Enzymes	Plasma membrane (Approved)	Fostamatinib	(M190)PID TCR JNK PATHWAY; (M1718)SIG IL4RECEPTOR IN B LYPHOCYTES; (M8626)SIG BCR SIGNALING PATHWAY	(M5950)HALLMARK ALLOGRAFT REJECTION; (M5953)HALLMARK KRAS SIGNALING UP	0.0	0.0	0.0	1.0	0.0	0.0	0.0	0.0	0.0	0.0	0.0	0.0	0.0	0.0	0.0	0.0	0.0	0.0	0.0	0.0
CD86	942	symbol	H. sapiens	942	H. sapiens	CD86	CD86 molecule	GO:0032681 regulation of lymphotoxin A production;GO:0032761 positive regulation of lymphotoxin A production;GO:1990051 activation of protein kinase C activity		Predicted intracellular proteins; FDA approved drug targets:Biotech drugs; CD markers	Plasma membrane (Supported); Additional: Centriolar satellite	Antithymocyte immunoglobulin (rabbit); Abatacept; Belatacept; Bryostatin 1	(M290)PID IL12 STAT4 PATHWAY; (M88)PID CD8 TCR PATHWAY; (M34)PID TCR PATHWAY	(M5947)HALLMARK IL2 STAT5 SIGNALING; (M5913)HALLMARK INTERFERON GAMMA RESPONSE; (M5915)HALLMARK APICAL JUNCTION	0.0	1.0	1.0	1.0	0.0	1.0	1.0	1.0	1.0	0.0	1.0	0.0	0.0	1.0	0.0	1.0	0.0	0.0	0.0	0.0
PRF1	5551	symbol	H. sapiens	5551	H. sapiens	PRF1	perforin 1	GO:0051712 positive regulation of killing of cells of another organism;GO:0002418 immune response to tumor cell;GO:0051709 regulation of killing of cells of another organism		Cancer-related genes; Disease related genes; Potential drug targets; Human disease related genes:Immune system diseases:Primary immunodeficiency; Predicted intracellular proteins; Transporters:Transporter channels and pores	Cytosol (Approved)		(M7997)SA CASPASE CASCADE; (M234)PID IL2 STAT5 PATHWAY; (M290)PID IL12 STAT4 PATHWAY	(M5902)HALLMARK APOPTOSIS; (M5950)HALLMARK ALLOGRAFT REJECTION	0.0	1.0	0.0	0.0	0.0	1.0	0.0	0.0	0.0	1.0	0.0	0.0	0.0	0.0	0.0	0.0	0.0	0.0	1.0	0.0
HSPA1A	3303	symbol	H. sapiens	3303	H. sapiens	HSPA1A	heat shock protein family A (Hsp70) member 1A	GO:1902380 positive regulation of endoribonuclease activity;GO:0060699 regulation of endoribonuclease activity;GO:0010286 heat acclimation		Disease related genes; Predicted intracellular proteins	Nucleoplasm;Vesicles (Approved); Additional: Cytosol			(M5921)HALLMARK COMPLEMENT	0.0	0.0	0.0	1.0	0.0	0.0	0.0	0.0	1.0	0.0	1.0	0.0	0.0	0.0	0.0	0.0	0.0	0.0	0.0	0.0
CLECL1	160365	symbol	H. sapiens	160365	H. sapiens	CLECL1	C-type lectin like 1	GO:0097323 B cell adhesion;GO:0032753 positive regulation of interleukin-4 production;GO:0032673 regulation of interleukin-4 production		Predicted intracellular proteins	Centriolar satellite;Plasma membrane (Supported)				0.0	0.0	0.0	0.0	0.0	0.0	0.0	0.0	1.0	0.0	1.0	0.0	0.0	0.0	0.0	0.0	0.0	1.0	0.0	0.0
TFPI	7035	symbol	H. sapiens	7035	H. sapiens	TFPI	tissue factor pathway inhibitor	GO:0030195 negative regulation of blood coagulation;GO:1900047 negative regulation of hemostasis;GO:0050819 negative regulation of coagulation		FDA approved drug targets:Small molecule drugs; Predicted secreted proteins; FDA approved drug targets:Biotech drugs; Candidate cardiovascular disease genes		Coagulation factor VIIa Recombinant Human; Dalteparin; Andexanet alfa	(M165)PID SYNDECAN 4 PATHWAY	(M5942)HALLMARK UV RESPONSE DN; (M5953)HALLMARK KRAS SIGNALING UP	0.0	0.0	0.0	1.0	0.0	0.0	0.0	0.0	0.0	0.0	0.0	1.0	0.0	0.0	0.0	0.0	0.0	0.0	1.0	0.0
TYMP	1890	symbol	H. sapiens	1890	H. sapiens	TYMP	thymidine phosphorylase	GO:0046074 dTMP catabolic process;GO:1905333 regulation of gastric motility;GO:0046073 dTMP metabolic process		Predicted intracellular proteins; ENZYME proteins:Transferases; Disease related genes; Cancer-related genes:Candidate cancer biomarkers; Enzymes; FDA approved drug targets:Small molecule drugs; Human disease related genes:Congenital disorders of metabolism:Mitochondrial diseases	Golgi apparatus;Nuclear bodies (Approved); Additional: Cytosol	Tipiracil			0.0	0.0	1.0	0.0	0.0	0.0	0.0	0.0	0.0	0.0	0.0	0.0	0.0	0.0	0.0	0.0	0.0	0.0	0.0	0.0
PLD4	122618	symbol	H. sapiens	122618	H. sapiens	PLD4	phospholipase D family member 4	GO:1900015 regulation of cytokine production involved in inflammatory response;GO:0002244 hematopoietic progenitor cell differentiation;GO:0006909 phagocytosis		Predicted intracellular proteins; Enzymes; ENZYME proteins:Hydrolases					0.0	0.0	1.0	0.0	0.0	1.0	0.0	0.0	0.0	0.0	0.0	0.0	0.0	0.0	0.0	0.0	0.0	0.0	0.0	0.0
C19orf35	374872	gene_synonym	H. sapiens	374872	H. sapiens	PEAK3	PEAK family member 3	GO:0008360 regulation of cell shape;GO:0022604 regulation of cell morphogenesis;GO:0032956 regulation of actin cytoskeleton organization	Other	Kinases; Predicted intracellular proteins; Enzymes	Cytosol (Uncertain)				0.0	0.0	0.0	0.0	0.0	0.0	0.0	0.0	0.0	0.0	0.0	0.0	0.0	0.0	0.0	0.0	0.0	0.0	0.0	0.0
ANKRD33B	651746	symbol	H. sapiens	651746	H. sapiens	ANKRD33B	ankyrin repeat domain 33B			Predicted intracellular proteins	Mitochondria (Approved)				0.0	0.0	0.0	0.0	0.0	0.0	0.0	0.0	0.0	0.0	0.0	0.0	0.0	0.0	0.0	0.0	0.0	0.0	0.0	0.0
LILRB2	10288	symbol	H. sapiens	10288	H. sapiens	LILRB2	leukocyte immunoglobulin like receptor B2	GO:1905875 negative regulation of postsynaptic density organization;GO:0140105 interleukin-10-mediated signaling pathway;GO:2000524 negative regulation of T cell costimulation		CD markers					0.0	1.0	1.0	1.0	0.0	0.0	1.0	1.0	1.0	0.0	1.0	0.0	0.0	0.0	0.0	0.0	0.0	1.0	0.0	0.0
FAM20C	56975	symbol	H. sapiens	56975	H. sapiens	FAM20C	FAM20C golgi associated secretory pathway kinase	GO:0036179 osteoclast maturation;GO:0071895 odontoblast differentiation;GO:0097187 dentinogenesis		Human disease related genes:Congenital malformations:Other congenital malformations; ENZYME proteins:Transferases; Predicted secreted proteins; Disease related genes; Potential drug targets; Enzymes	Golgi apparatus (Approved); Additional: Nucleoplasm		(M3468)NABA ECM REGULATORS; (M5885)NABA MATRISOME ASSOCIATED; (M5889)NABA MATRISOME		1.0	0.0	0.0	0.0	1.0	1.0	0.0	0.0	0.0	0.0	0.0	0.0	0.0	0.0	0.0	0.0	0.0	0.0	0.0	0.0
FUT7	2529	symbol	H. sapiens	2529	H. sapiens	FUT7	fucosyltransferase 7	GO:0001807 regulation of type IV hypersensitivity;GO:0002522 leukocyte migration involved in immune response;GO:0097022 lymphocyte migration into lymph node		Predicted intracellular proteins	Golgi apparatus (Approved)				0.0	0.0	1.0	0.0	0.0	1.0	0.0	0.0	1.0	0.0	0.0	1.0	0.0	1.0	0.0	0.0	0.0	0.0	0.0	0.0
MNDA	4332	symbol	H. sapiens	4332	H. sapiens	MNDA	myeloid cell nuclear differentiation antigen	GO:0030889 negative regulation of B cell proliferation;GO:0035458 cellular response to interferon-beta;GO:0035456 response to interferon-beta		Predicted intracellular proteins	Nucleoplasm (Supported); Additional: Cytosol;Nucleoli;Nucleoli rim;Vesicles				0.0	0.0	1.0	0.0	0.0	0.0	1.0	0.0	1.0	1.0	1.0	1.0	0.0	0.0	0.0	0.0	0.0	0.0	0.0	0.0
ME1	4199	symbol	H. sapiens	4199	H. sapiens	ME1	malic enzyme 1	GO:1902031 regulation of NADP metabolic process;GO:0006108 malate metabolic process;GO:0051289 protein homotetramerization		ENZYME proteins:Oxidoreductases; Predicted intracellular proteins; Enzymes	Nucleoplasm;Plasma membrane (Uncertain); Additional: Cytosol	NADH; Nicotinamide adenine dinucleotide phosphate		(M5935)HALLMARK FATTY ACID METABOLISM; (M5905)HALLMARK ADIPOGENESIS; (M5921)HALLMARK COMPLEMENT	0.0	0.0	0.0	0.0	0.0	0.0	0.0	0.0	0.0	0.0	0.0	0.0	0.0	0.0	0.0	0.0	0.0	0.0	0.0	0.0
TAGAP	117289	symbol	H. sapiens	117289	H. sapiens	TAGAP	T cell activation RhoGTPase activating protein	GO:0051056 regulation of small GTPase mediated signal transduction;GO:1902531 regulation of intracellular signal transduction;GO:0050790 regulation of catalytic activity		Predicted intracellular proteins	Cytosol (Approved)				0.0	0.0	0.0	0.0	0.0	0.0	0.0	0.0	0.0	0.0	0.0	0.0	0.0	0.0	0.0	0.0	0.0	0.0	0.0	0.0
KRT6A	3853	symbol	H. sapiens	3853	H. sapiens	KRT6A	keratin 6A	GO:0001898 regulation of cytolysis by symbiont of host cells;GO:0001899 negative regulation of cytolysis by symbiont of host cells;GO:2000536 negative regulation of entry of bacterium into host cell		Disease related genes; Human disease related genes:Congenital malformations:Congenital malformations of skin; Predicted intracellular proteins	Intermediate filaments (Enhanced)	Zinc; Zinc acetate			0.0	0.0	0.0	1.0	1.0	0.0	0.0	0.0	0.0	0.0	0.0	0.0	0.0	0.0	1.0	0.0	0.0	0.0	0.0	0.0
LINC01336	51301	gene_synonym	H. sapiens	51301	H. sapiens	GCNT4	glucosaminyl (N-acetyl) transferase 4	GO:0002121 inter-male aggressive behavior;GO:0002118 aggressive behavior;GO:0042403 thyroid hormone metabolic process		ENZYME proteins:Transferases; Predicted intracellular proteins; Enzymes	Golgi apparatus (Supported); Additional: Nucleoplasm				0.0	0.0	0.0	0.0	0.0	0.0	0.0	0.0	0.0	0.0	0.0	0.0	0.0	0.0	0.0	0.0	0.0	0.0	0.0	0.0
OSMR-AS1	101929768	gene_synonym	H. sapiens	101929768	H. sapiens	OSMR-DT	OSMR divergent transcript								0.0	0.0	0.0	0.0	0.0	0.0	0.0	0.0	0.0	0.0	0.0	0.0	0.0	0.0	0.0	0.0	0.0	0.0	0.0	0.0
LGALS2	3957	symbol	H. sapiens	3957	H. sapiens	LGALS2	galectin 2	GO:0043029 T cell homeostasis;GO:0002260 lymphocyte homeostasis;GO:0001776 leukocyte homeostasis		Predicted intracellular proteins	Mitochondria (Approved); Additional: Nucleoplasm	Beta-D-Glucose	(M5880)NABA ECM AFFILIATED; (M5885)NABA MATRISOME ASSOCIATED; (M5889)NABA MATRISOME		1.0	0.0	0.0	0.0	0.0	0.0	0.0	0.0	0.0	1.0	0.0	1.0	0.0	0.0	0.0	0.0	0.0	1.0	0.0	1.0
LGALS9C	654346	symbol	H. sapiens	654346	H. sapiens	LGALS9C	galectin 9C	GO:2000562 negative regulation of CD4-positive, alpha-beta T cell proliferation;GO:2000561 regulation of CD4-positive, alpha-beta T cell proliferation;GO:0046642 negative regulation of alpha-beta T cell proliferation		Predicted intracellular proteins	Cytosol (Approved)		(M5880)NABA ECM AFFILIATED; (M5885)NABA MATRISOME ASSOCIATED; (M5889)NABA MATRISOME		1.0	0.0	0.0	0.0	0.0	0.0	0.0	0.0	1.0	0.0	0.0	0.0	0.0	0.0	0.0	0.0	0.0	0.0	0.0	1.0
SLC6A4	6532	symbol	H. sapiens	6532	H. sapiens	SLC6A4	solute carrier family 6 member 4	GO:0014064 positive regulation of serotonin secretion;GO:0090067 regulation of thalamus size;GO:0032227 negative regulation of synaptic transmission, dopaminergic		Transporters:Electrochemical Potential-driven transporters; FDA approved drug targets:Small molecule drugs; Human disease related genes:Other diseases:Mental and behavioural disorders	Golgi apparatus;Vesicles (Supported)	Fluvoxamine; Amphetamine; Phentermine; Tramadol; Citalopram; Benzatropine; Venlafaxine; Atomoxetine; Amitriptyline; Protriptyline; Loxapine; Meperidine; Imipramine; Fluoxetine; Duloxetine; Dextromethorphan; Nortriptyline; Amoxapine; Fenfluramine; Mazindol; Trazodone; Verapamil; Paroxetine; Trimipramine; Minaprine; Pseudoephedrine; Cocaine; Cyclobenzaprine; Dopamine; Sertraline; Sibutramine; Chlor…			0.0	0.0	0.0	1.0	0.0	0.0	0.0	0.0	1.0	0.0	0.0	0.0	0.0	0.0	0.0	0.0	0.0	0.0	0.0	0.0
SFTA1P	207107	symbol	H. sapiens	207107	H. sapiens	SFTA1P	surfactant associated 1, lncRNA								0.0	0.0	0.0	0.0	0.0	0.0	0.0	0.0	0.0	0.0	0.0	0.0	0.0	0.0	0.0	0.0	0.0	0.0	0.0	0.0
KRT83	3889	symbol	H. sapiens	3889	H. sapiens	KRT83	keratin 83	GO:0045109 intermediate filament organization;GO:0031424 keratinization;GO:0045104 intermediate filament cytoskeleton organization		Disease related genes; Human disease related genes:Congenital malformations:Congenital malformations of skin; Predicted intracellular proteins					0.0	0.0	0.0	0.0	1.0	0.0	0.0	0.0	0.0	0.0	0.0	0.0	0.0	0.0	0.0	0.0	0.0	0.0	0.0	0.0
SARDH	1757	symbol	H. sapiens	1757	H. sapiens	SARDH	sarcosine dehydrogenase	GO:1901053 sarcosine catabolic process;GO:1901052 sarcosine metabolic process;GO:0042219 cellular modified amino acid catabolic process		Enzymes; Disease related genes; ENZYME proteins:Oxidoreductases; Potential drug targets; Predicted intracellular proteins	Mitochondria (Approved)				0.0	0.0	0.0	0.0	0.0	0.0	0.0	0.0	0.0	0.0	0.0	0.0	0.0	0.0	0.0	0.0	0.0	0.0	0.0	0.0
RLN1	6013	symbol	H. sapiens	6013	H. sapiens	RLN1	relaxin 1	GO:0007565 female pregnancy;GO:0044703 multi-organism reproductive process;GO:0044706 multi-multicellular organism process		Predicted secreted proteins					0.0	0.0	0.0	0.0	0.0	0.0	0.0	0.0	0.0	0.0	0.0	0.0	1.0	0.0	0.0	0.0	0.0	0.0	0.0	0.0
ITGA5	3678	symbol	H. sapiens	3678	H. sapiens	ITGA5	integrin subunit alpha 5	GO:0033631 cell-cell adhesion mediated by integrin;GO:0023035 CD40 signaling pathway;GO:0035313 wound healing, spreading of epidermal cells		Cancer-related genes:Candidate cancer biomarkers; CD markers		Resveratrol	(M274)PID LYMPH ANGIOGENESIS PATHWAY; (M47)PID INTEGRIN CS PATHWAY; (M165)PID SYNDECAN 4 PATHWAY	(M5930)HALLMARK EPITHELIAL MESENCHYMAL TRANSITION; (M5932)HALLMARK INFLAMMATORY RESPONSE	0.0	0.0	0.0	0.0	0.0	0.0	0.0	0.0	1.0	0.0	0.0	0.0	1.0	0.0	0.0	0.0	1.0	1.0	0.0	0.0
AC009784.3						None	None	None	None	None	None	None	None	None	nan	nan	nan	nan	nan	nan	nan	nan	nan	nan	nan	nan	nan	nan	nan	nan	nan	nan	nan	nan
TRIM15	89870	symbol	H. sapiens	89870	H. sapiens	TRIM15	tripartite motif containing 15	GO:1901253 negative regulation of intracellular transport of viral material;GO:0007500 mesodermal cell fate determination;GO:1901252 regulation of intracellular transport of viral material		Predicted intracellular proteins	Cytosol (Approved); Additional: Centriolar satellite				0.0	0.0	0.0	0.0	0.0	0.0	0.0	0.0	0.0	1.0	1.0	0.0	0.0	0.0	0.0	0.0	0.0	0.0	0.0	0.0
PIK3AP1	118788	symbol	H. sapiens	118788	H. sapiens	PIK3AP1	phosphoinositide-3-kinase adaptor protein 1	GO:0034134 toll-like receptor 2 signaling pathway;GO:0034154 toll-like receptor 7 signaling pathway;GO:0034162 toll-like receptor 9 signaling pathway		Predicted intracellular proteins	Cytosol (Approved); Additional: Nucleoplasm;Plasma membrane				0.0	0.0	0.0	0.0	0.0	0.0	1.0	1.0	0.0	0.0	0.0	1.0	0.0	0.0	0.0	0.0	0.0	0.0	0.0	0.0
VIM	7431	symbol	H. sapiens	7431	H. sapiens	VIM	vimentin	GO:0060020 Bergmann glial cell differentiation;GO:0071225 cellular response to muramyl dipeptide;GO:0070307 lens fiber cell development		Disease related genes; Predicted intracellular proteins; Human disease related genes:Nervous system diseases:Eye disease	Intermediate filaments (Supported)	Artenimol; Phenethyl Isothiocyanate	(M14)PID AURORA B PATHWAY; (M220)PID CASPASE PATHWAY	(M5930)HALLMARK EPITHELIAL MESENCHYMAL TRANSITION	0.0	0.0	1.0	1.0	1.0	0.0	0.0	0.0	0.0	0.0	0.0	0.0	0.0	0.0	0.0	0.0	0.0	0.0	0.0	0.0
BAALC	79870	symbol	H. sapiens	79870	H. sapiens	BAALC	BAALC binder of MAP3K1 and KLF4			Predicted intracellular proteins	Cytosol (Supported); Additional: Nucleoplasm				0.0	0.0	0.0	0.0	0.0	0.0	0.0	0.0	0.0	0.0	0.0	0.0	0.0	0.0	0.0	0.0	0.0	0.0	0.0	0.0
S100B	6285	symbol	H. sapiens	6285	H. sapiens	S100B	S100 calcium binding protein B	GO:0048168 regulation of neuronal synaptic plasticity;GO:0007613 memory;GO:0043123 positive regulation of I-kappaB kinase/NF-kappaB signaling		Transporters:Accessory Factors Involved in Transport; Predicted intracellular proteins; Cancer-related genes:Candidate cancer biomarkers; Candidate cardiovascular disease genes	Cytosol;Nucleoplasm (Supported); Additional: Vesicles	Olopatadine; Calcium; N-Formylmethionine; Arundic acid; (Z)-2-[2-(4-methylpiperazin-1-yl)benzyl]diazenecarbothioamide; 2-[(5-hex-1-yn-1-ylfuran-2-yl)carbonyl]-N-methylhydrazinecarbothioamide; Calcium citrate; Calcium Phosphate; Calcium phosphate dihydrate	(M5883)NABA SECRETED FACTORS; (M5885)NABA MATRISOME ASSOCIATED; (M5889)NABA MATRISOME		1.0	0.0	1.0	0.0	0.0	0.0	0.0	0.0	0.0	0.0	0.0	0.0	0.0	0.0	0.0	0.0	0.0	0.0	0.0	0.0
LAG3	3902	symbol	H. sapiens	3902	H. sapiens	LAG3	lymphocyte activating 3	GO:0002270 plasmacytoid dendritic cell activation;GO:0045590 negative regulation of regulatory T cell differentiation;GO:0045954 positive regulation of natural killer cell mediated cytotoxicity		Predicted intracellular proteins; CD markers					0.0	1.0	1.0	0.0	0.0	1.0	1.0	1.0	1.0	1.0	0.0	1.0	0.0	1.0	0.0	0.0	0.0	0.0	0.0	0.0
SIGLEC1	6614	symbol	H. sapiens	6614	H. sapiens	SIGLEC1	sialic acid binding Ig like lectin 1	GO:0075512 clathrin-dependent endocytosis of virus by host cell;GO:0019065 receptor-mediated endocytosis of virus by host cell;GO:0075509 endocytosis involved in viral entry into host cell		Predicted intracellular proteins; CD markers		Beta-D-Glucose; N-acetyl-alpha-neuraminic acid			0.0	0.0	1.0	0.0	0.0	0.0	0.0	1.0	0.0	0.0	0.0	0.0	0.0	0.0	0.0	0.0	0.0	1.0	0.0	0.0
VAV1	7409	symbol	H. sapiens	7409	H. sapiens	VAV1	vav guanine nucleotide exchange factor 1	GO:0002433 immune response-regulating cell surface receptor signaling pathway involved in phagocytosis;GO:0038096 Fc-gamma receptor signaling pathway involved in phagocytosis;GO:0002431 Fc receptor mediated stimulatory signaling pathway		Predicted intracellular proteins	Cytosol (Approved)		(M17200)SA B CELL RECEPTOR COMPLEXES; (M1315)SIG PIP3 SIGNALING IN B LYMPHOCYTES; (M241)PID RAC1 REG PATHWAY		0.0	0.0	1.0	0.0	0.0	1.0	1.0	1.0	1.0	1.0	0.0	1.0	1.0	1.0	0.0	0.0	0.0	0.0	0.0	0.0
TOX2	84969	symbol	H. sapiens	84969	H. sapiens	TOX2	TOX high mobility group box family member 2	GO:0045944 positive regulation of transcription by RNA polymerase II;GO:0045893 positive regulation of transcription, DNA-templated;GO:1903508 positive regulation of nucleic acid-templated transcription		Transcription factors:Other all-alpha-helical DNA-binding domains; Predicted intracellular proteins	Nucleoplasm (Supported)				0.0	0.0	0.0	0.0	0.0	0.0	0.0	0.0	0.0	0.0	0.0	0.0	0.0	0.0	0.0	0.0	0.0	0.0	0.0	0.0
KRT84	3890	symbol	H. sapiens	3890	H. sapiens	KRT84	keratin 84	GO:0035878 nail development;GO:0045616 regulation of keratinocyte differentiation;GO:0045604 regulation of epidermal cell differentiation		Predicted intracellular proteins					0.0	0.0	0.0	0.0	1.0	0.0	0.0	0.0	0.0	0.0	0.0	0.0	0.0	0.0	0.0	0.0	0.0	0.0	0.0	0.0
LILRA1	11024	symbol	H. sapiens	11024	H. sapiens	LILRA1	leukocyte immunoglobulin like receptor A1	GO:0019221 cytokine-mediated signaling pathway;GO:0002250 adaptive immune response;GO:0071345 cellular response to cytokine stimulus		CD markers					0.0	1.0	1.0	0.0	0.0	0.0	0.0	1.0	0.0	0.0	0.0	0.0	0.0	0.0	0.0	0.0	0.0	0.0	0.0	0.0
HGF	3082	symbol	H. sapiens	3082	H. sapiens	HGF	hepatocyte growth factor	GO:0060665 regulation of branching involved in salivary gland morphogenesis by mesenchymal-epithelial signaling;GO:0051450 myoblast proliferation;GO:0060638 mesenchymal-epithelial cell signaling		Peptidases:Serine-type peptidases; RAS pathway related proteins; Human disease related genes:Nervous system diseases:Ear disease; Human disease related genes:Cancers:Cancers of the digestive system; Predicted secreted proteins; Candidate cardiovascular disease genes; Disease related genes; Potential drug targets; Cancer-related genes:Mutational cancer driver genes; Enzymes; Cancer-related genes:C…		Heparin; O2-Sulfo-Glucuronic Acid; N,O6-Disulfo-Glucosamine; ABT-510; Foretinib	(M86)PID ARF6 PATHWAY; (M232)PID ECADHERIN STABILIZATION PATHWAY; (M91)PID TCPTP PATHWAY	(M5902)HALLMARK APOPTOSIS	1.0	0.0	1.0	0.0	0.0	0.0	0.0	0.0	0.0	0.0	1.0	1.0	0.0	0.0	0.0	0.0	0.0	0.0	0.0	0.0
IRX3	79191	symbol	H. sapiens	79191	H. sapiens	IRX3	iroquois homeobox 3	GO:0003165 Purkinje myocyte development;GO:0003167 atrioventricular bundle cell differentiation;GO:0060932 His-Purkinje system cell differentiation		Transcription factors:Helix-turn-helix domains; Predicted intracellular proteins	Nucleoplasm (Approved); Additional: Cytosol				0.0	0.0	0.0	0.0	0.0	0.0	0.0	0.0	0.0	0.0	0.0	0.0	0.0	0.0	0.0	0.0	0.0	0.0	0.0	0.0
LINC01116	375295	symbol	H. sapiens	375295	H. sapiens	LINC01116	long intergenic non-protein coding RNA 1116								0.0	0.0	0.0	0.0	0.0	0.0	0.0	0.0	0.0	0.0	0.0	0.0	0.0	0.0	0.0	0.0	0.0	0.0	0.0	0.0
CD72	971	symbol	H. sapiens	971	H. sapiens	CD72	CD72 molecule	GO:0007155 cell adhesion;GO:0009987 cellular process;GO:0008150 biological_process		Predicted intracellular proteins; CD markers	Mitochondria;Nucleoplasm (Approved)		(M10)PID BCR 5PATHWAY		0.0	0.0	0.0	0.0	0.0	0.0	0.0	0.0	0.0	0.0	0.0	0.0	0.0	0.0	0.0	0.0	0.0	0.0	0.0	0.0
EVC2	132884	symbol	H. sapiens	132884	H. sapiens	EVC2	EvC ciliary complex subunit 2	GO:0007224 smoothened signaling pathway;GO:0007166 cell surface receptor signaling pathway;GO:0007165 signal transduction		Disease related genes; Human disease related genes:Congenital malformations:Congenital malformations of the musculoskeletal system	Cytokinetic bridge;Microtubules (Approved); Additional: Cytosol;Nucleoplasm				0.0	0.0	0.0	0.0	0.0	0.0	0.0	0.0	0.0	0.0	0.0	0.0	0.0	0.0	0.0	0.0	0.0	0.0	0.0	0.0
KRT72	140807	symbol	H. sapiens	140807	H. sapiens	KRT72	keratin 72	GO:0045109 intermediate filament organization;GO:0031424 keratinization;GO:0045104 intermediate filament cytoskeleton organization		Predicted intracellular proteins					0.0	0.0	0.0	0.0	1.0	0.0	0.0	0.0	0.0	0.0	0.0	0.0	0.0	0.0	0.0	0.0	0.0	0.0	0.0	0.0
RP11-18H21.1						None	None	None	None	None	None	None	None	None	nan	nan	nan	nan	nan	nan	nan	nan	nan	nan	nan	nan	nan	nan	nan	nan	nan	nan	nan	nan
DOCK2	1794	symbol	H. sapiens	1794	H. sapiens	DOCK2	dedicator of cytokinesis 2	GO:0001766 membrane raft polarization;GO:0002277 myeloid dendritic cell activation involved in immune response;GO:0046633 alpha-beta T cell proliferation		Disease related genes; Cancer-related genes:Mutational cancer driver genes; Human disease related genes:Immune system diseases:Primary immunodeficiency; Predicted intracellular proteins			(M210)PID IL8 CXCR2 PATHWAY; (M241)PID RAC1 REG PATHWAY	(M5893)HALLMARK MITOTIC SPINDLE; (M5953)HALLMARK KRAS SIGNALING UP	0.0	0.0	1.0	0.0	0.0	1.0	0.0	0.0	0.0	0.0	0.0	0.0	0.0	0.0	0.0	0.0	0.0	0.0	0.0	0.0
HCG4	54435	symbol	H. sapiens	54435	H. sapiens	HCG4	HLA complex group 4								0.0	0.0	0.0	0.0	0.0	0.0	0.0	0.0	0.0	0.0	0.0	0.0	0.0	0.0	0.0	0.0	0.0	0.0	0.0	0.0
GZMA	3001	symbol	H. sapiens	3001	H. sapiens	GZMA	granzyme A	GO:0032078 negative regulation of endodeoxyribonuclease activity;GO:1902483 cytotoxic T cell pyroptotic process;GO:0032076 negative regulation of deoxyribonuclease activity		Predicted secreted proteins; Peptidases:Serine-type peptidases; Enzymes; ENZYME proteins:Hydrolases			(M54)PID IL12 2PATHWAY	(M5913)HALLMARK INTERFERON GAMMA RESPONSE; (M5921)HALLMARK COMPLEMENT; (M5950)HALLMARK ALLOGRAFT REJECTION	0.0	0.0	0.0	1.0	0.0	0.0	0.0	0.0	0.0	0.0	0.0	0.0	1.0	0.0	0.0	0.0	0.0	0.0	0.0	0.0
LINC01305	285084	symbol	H. sapiens	285084	H. sapiens	LINC01305	long intergenic non-protein coding RNA 1305								0.0	0.0	0.0	0.0	0.0	0.0	0.0	0.0	0.0	0.0	0.0	0.0	0.0	0.0	0.0	0.0	0.0	0.0	0.0	0.0
DOC2B	8447	symbol	H. sapiens	8447	H. sapiens	DOC2B	double C2 domain beta	GO:0061669 spontaneous neurotransmitter secretion;GO:0098814 spontaneous synaptic transmission;GO:0031340 positive regulation of vesicle fusion		Predicted intracellular proteins					0.0	0.0	0.0	0.0	0.0	0.0	0.0	0.0	0.0	0.0	0.0	0.0	0.0	0.0	0.0	0.0	0.0	0.0	0.0	0.0
S100A2	6273	symbol	H. sapiens	6273	H. sapiens	S100A2	S100 calcium binding protein A2	GO:0043542 endothelial cell migration;GO:0010631 epithelial cell migration;GO:0090132 epithelium migration		Predicted intracellular proteins; Cancer-related genes:Candidate cancer biomarkers	Cytosol;Nucleoplasm (Approved); Additional: Nucleoli;Plasma membrane	Olopatadine; Calcium; Zinc; Copper; Zinc acetate; Zinc chloride; Zinc sulfate, unspecified form	(M256)PID TAP63 PATHWAY; (M19)PID P73PATHWAY; (M145)PID P53 DOWNSTREAM PATHWAY		1.0	0.0	0.0	0.0	0.0	0.0	0.0	0.0	0.0	0.0	0.0	0.0	0.0	0.0	0.0	0.0	0.0	0.0	0.0	0.0
C1QA	712	symbol	H. sapiens	712	H. sapiens	C1QA	complement C1q A chain	GO:0150064 vertebrate eye-specific patterning;GO:0150062 complement-mediated synapse pruning;GO:0098883 synapse pruning		Human disease related genes:Immune system diseases:Allergies and autoimmune diseases; Predicted secreted proteins; Disease related genes; Human disease related genes:Immune system diseases:Primary immunodeficiency; Human disease related genes:Skin diseases:Skin and soft tissue diseases		Cetuximab; Etanercept; Palivizumab; Daclizumab; Bevacizumab	(M5880)NABA ECM AFFILIATED; (M5885)NABA MATRISOME ASSOCIATED; (M5889)NABA MATRISOME	(M5946)HALLMARK COAGULATION; (M5921)HALLMARK COMPLEMENT	1.0	1.0	1.0	0.0	0.0	1.0	1.0	0.0	0.0	0.0	0.0	0.0	0.0	0.0	1.0	0.0	0.0	0.0	1.0	1.0
TNFRSF9	3604	symbol	H. sapiens	3604	H. sapiens	TNFRSF9	TNF receptor superfamily member 9	GO:0008285 negative regulation of cell population proliferation;GO:0006915 apoptotic process;GO:0012501 programmed cell death		Predicted intracellular proteins; Cancer-related genes:Candidate cancer biomarkers; CD markers	Plasma membrane (Approved); Additional: Nucleoli	Urelumab	(M272)PID CD8 TCR DOWNSTREAM PATHWAY	(M5947)HALLMARK IL2 STAT5 SIGNALING; (M5890)HALLMARK TNFA SIGNALING VIA NFKB; (M5932)HALLMARK INFLAMMATORY RESPONSE	0.0	0.0	1.0	0.0	0.0	0.0	0.0	0.0	1.0	0.0	0.0	0.0	0.0	0.0	0.0	0.0	0.0	0.0	0.0	0.0
WDR66	144406	gene_synonym	H. sapiens	144406	H. sapiens	CFAP251	cilia and flagella associated protein 251	GO:0030317 flagellated sperm motility;GO:0097722 sperm motility;GO:0060294 cilium movement involved in cell motility		Disease related genes; Human disease related genes:Reproductive system diseases:Reproductive system diseases; Predicted intracellular proteins	Cytosol;Plasma membrane (Approved)				0.0	0.0	0.0	0.0	0.0	0.0	0.0	0.0	0.0	0.0	0.0	0.0	0.0	0.0	0.0	0.0	0.0	0.0	0.0	0.0
CD300C	10871	symbol	H. sapiens	10871	H. sapiens	CD300C	CD300c molecule	GO:0006968 cellular defense response;GO:0006952 defense response;GO:0002376 immune system process		CD markers	Golgi apparatus (Uncertain); Additional: Mitochondria;Vesicles				0.0	0.0	0.0	0.0	0.0	0.0	0.0	1.0	0.0	0.0	0.0	0.0	0.0	0.0	0.0	0.0	0.0	0.0	0.0	0.0
EIF5A2	56648	symbol	H. sapiens	56648	H. sapiens	EIF5A2	eukaryotic translation initiation factor 5A2	GO:0010509 polyamine homeostasis;GO:0045901 positive regulation of translational elongation;GO:0045905 positive regulation of translational termination		Predicted intracellular proteins; Transporters:Transporter channels and pores	Vesicles (Supported)				0.0	0.0	0.0	0.0	0.0	0.0	0.0	0.0	0.0	0.0	0.0	0.0	0.0	0.0	0.0	0.0	0.0	0.0	0.0	0.0
LINC01160	100129269	symbol	H. sapiens	100129269	H. sapiens	LINC01160	long intergenic non-protein coding RNA 1160								0.0	0.0	0.0	0.0	0.0	0.0	0.0	0.0	0.0	0.0	0.0	0.0	0.0	0.0	0.0	0.0	0.0	0.0	0.0	0.0
RP11-594N15.3						None	None	None	None	None	None	None	None	None	nan	nan	nan	nan	nan	nan	nan	nan	nan	nan	nan	nan	nan	nan	nan	nan	nan	nan	nan	nan
MS4A6A	64231	symbol	H. sapiens	64231	H. sapiens	MS4A6A	membrane spanning 4-domains A6A	GO:0007166 cell surface receptor signaling pathway;GO:0007165 signal transduction;GO:0023052 signaling		Predicted intracellular proteins	Vesicles (Approved)				0.0	0.0	0.0	0.0	0.0	0.0	0.0	0.0	0.0	0.0	0.0	0.0	0.0	0.0	0.0	0.0	0.0	0.0	0.0	0.0
ZFP92	139735	symbol	H. sapiens	139735	H. sapiens	ZFP92	ZFP92 zinc finger protein	GO:0006357 regulation of transcription by RNA polymerase II;GO:0006355 regulation of transcription, DNA-templated;GO:1903506 regulation of nucleic acid-templated transcription		Transcription factors:Zinc-coordinating DNA-binding domains; Predicted intracellular proteins					0.0	0.0	0.0	0.0	0.0	0.0	0.0	0.0	0.0	0.0	0.0	0.0	0.0	0.0	0.0	0.0	0.0	0.0	0.0	0.0
TM4SF19-AS1	100874214	symbol	H. sapiens	100874214	H. sapiens	TM4SF19-AS1	TM4SF19 antisense RNA 1								0.0	0.0	0.0	0.0	0.0	0.0	0.0	0.0	0.0	0.0	0.0	0.0	0.0	0.0	0.0	0.0	0.0	0.0	0.0	0.0
SERPINB4	6318	symbol	H. sapiens	6318	H. sapiens	SERPINB4	serpin family B member 4	GO:0042270 protection from natural killer cell mediated cytotoxicity;GO:0045953 negative regulation of natural killer cell mediated cytotoxicity;GO:0002716 negative regulation of natural killer cell mediated immunity		Predicted intracellular proteins; Cancer-related genes:Candidate cancer biomarkers			(M3468)NABA ECM REGULATORS; (M5885)NABA MATRISOME ASSOCIATED; (M5889)NABA MATRISOME		1.0	0.0	0.0	0.0	0.0	0.0	0.0	0.0	1.0	1.0	0.0	1.0	0.0	1.0	0.0	0.0	0.0	0.0	0.0	0.0
TNC	3371	symbol	H. sapiens	3371	H. sapiens	TNC	tenascin C	GO:0060739 mesenchymal-epithelial cell signaling involved in prostate gland development;GO:0014012 peripheral nervous system axon regeneration;GO:0060638 mesenchymal-epithelial cell signaling		Human disease related genes:Nervous system diseases:Ear disease; Predicted secreted proteins; Disease related genes; Predicted intracellular proteins; Cancer-related genes:Candidate cancer biomarkers			(M118)PID INTEGRIN A9B1 PATHWAY; (M165)PID SYNDECAN 4 PATHWAY; (M53)PID INTEGRIN3 PATHWAY	(M5890)HALLMARK TNFA SIGNALING VIA NFKB; (M5930)HALLMARK EPITHELIAL MESENCHYMAL TRANSITION	0.0	0.0	0.0	0.0	0.0	0.0	0.0	0.0	1.0	0.0	0.0	1.0	0.0	0.0	0.0	0.0	0.0	0.0	0.0	0.0
LTB	4050	symbol	H. sapiens	4050	H. sapiens	LTB	lymphotoxin beta	GO:0048535 lymph node development;GO:0032735 positive regulation of interleukin-12 production;GO:0032655 regulation of interleukin-12 production		Predicted intracellular proteins; Cancer-related genes:Candidate cancer biomarkers	Centrosome (Approved)		(M5883)NABA SECRETED FACTORS; (M5885)NABA MATRISOME ASSOCIATED; (M5889)NABA MATRISOME	(M5897)HALLMARK IL6 JAK STAT3 SIGNALING; (M5947)HALLMARK IL2 STAT5 SIGNALING; (M5950)HALLMARK ALLOGRAFT REJECTION	1.0	0.0	1.0	0.0	1.0	1.0	0.0	0.0	0.0	0.0	1.0	0.0	0.0	0.0	0.0	0.0	0.0	0.0	0.0	0.0
TFPI2	7980	symbol	H. sapiens	7980	H. sapiens	TFPI2	tissue factor pathway inhibitor 2	GO:0071498 cellular response to fluid shear stress;GO:0034405 response to fluid shear stress;GO:0007596 blood coagulation		Predicted intracellular proteins; Predicted secreted proteins				(M5946)HALLMARK COAGULATION; (M5907)HALLMARK ESTROGEN RESPONSE LATE; (M5921)HALLMARK COMPLEMENT	0.0	0.0	0.0	0.0	0.0	0.0	0.0	0.0	0.0	0.0	0.0	0.0	0.0	0.0	0.0	0.0	0.0	0.0	0.0	0.0
RP11-818F20.5						None	None	None	None	None	None	None	None	None	nan	nan	nan	nan	nan	nan	nan	nan	nan	nan	nan	nan	nan	nan	nan	nan	nan	nan	nan	nan
SERPINE2	5270	symbol	H. sapiens	5270	H. sapiens	SERPINE2	serpin family E member 2	GO:0042628 mating plug formation;GO:0061108 seminal vesicle epithelium development;GO:0061107 seminal vesicle development		Predicted secreted proteins	Golgi apparatus (Approved)		(M3468)NABA ECM REGULATORS; (M5885)NABA MATRISOME ASSOCIATED; (M5889)NABA MATRISOME	(M5930)HALLMARK EPITHELIAL MESENCHYMAL TRANSITION	1.0	0.0	0.0	0.0	0.0	0.0	0.0	0.0	1.0	0.0	0.0	1.0	0.0	0.0	0.0	0.0	0.0	0.0	0.0	0.0
MYO1G	64005	symbol	H. sapiens	64005	H. sapiens	MYO1G	myosin IG	GO:0071976 cell gliding;GO:0120117 T cell meandering migration;GO:0030050 vesicle transport along actin filament		Predicted intracellular proteins	Plasma membrane (Supported); Additional: Nucleoplasm				0.0	1.0	1.0	0.0	1.0	1.0	1.0	0.0	0.0	0.0	0.0	0.0	0.0	0.0	0.0	0.0	0.0	0.0	1.0	0.0
CFP	5199	symbol	H. sapiens	5199	H. sapiens	CFP	complement factor properdin	GO:1903028 positive regulation of opsonization;GO:1903027 regulation of opsonization;GO:0006957 complement activation, alternative pathway		Disease related genes; Predicted intracellular proteins; Human disease related genes:Immune system diseases:Primary immunodeficiency; Predicted secreted proteins	Vesicles (Approved)			(M5924)HALLMARK MTORC1 SIGNALING; (M5950)HALLMARK ALLOGRAFT REJECTION	0.0	0.0	1.0	1.0	0.0	1.0	1.0	0.0	0.0	0.0	0.0	0.0	0.0	1.0	1.0	0.0	0.0	0.0	1.0	1.0
KLK14	43847	symbol	H. sapiens	43847	H. sapiens	KLK14	kallikrein related peptidase 14	GO:0070684 seminal clot liquefaction;GO:0007320 insemination;GO:0007620 copulation		Predicted secreted proteins; Peptidases:Serine-type peptidases; Enzymes; Cancer-related genes:Candidate cancer biomarkers					0.0	0.0	0.0	0.0	1.0	0.0	0.0	0.0	0.0	0.0	0.0	0.0	0.0	0.0	0.0	0.0	0.0	0.0	0.0	0.0
CTD-2341M24.1						None	None	None	None	None	None	None	None	None	nan	nan	nan	nan	nan	nan	nan	nan	nan	nan	nan	nan	nan	nan	nan	nan	nan	nan	nan	nan
CES1P1	51716	symbol	H. sapiens	51716	H. sapiens	CES1P1	carboxylesterase 1 pseudogene 1								0.0	0.0	0.0	0.0	0.0	0.0	0.0	0.0	0.0	0.0	0.0	0.0	0.0	0.0	0.0	0.0	0.0	0.0	0.0	0.0
ALDOB	229	symbol	H. sapiens	229	H. sapiens	ALDOB	aldolase, fructose-bisphosphate B	GO:0006116 NADH oxidation;GO:0070072 vacuolar proton-transporting V-type ATPase complex assembly;GO:0070070 proton-transporting V-type ATPase complex assembly		Predicted intracellular proteins; ENZYME proteins:Lyases; Disease related genes; Potential drug targets; Human disease related genes:Congenital disorders of metabolism:Congenital disorders of carbohydrate metabolism; Enzymes; Cancer-related genes:Candidate cancer biomarkers		1,6-Fructose Diphosphate (Linear Form); sn-glycerol 3-phosphate; Dihydroxyacetone phosphate	(M106)PID HNF3B PATHWAY	(M5891)HALLMARK HYPOXIA; (M5937)HALLMARK GLYCOLYSIS	0.0	0.0	0.0	0.0	0.0	0.0	0.0	0.0	0.0	0.0	0.0	0.0	0.0	0.0	0.0	0.0	0.0	0.0	0.0	0.0
CLCA3P	9629	symbol	H. sapiens	9629	H. sapiens	CLCA3P	chloride channel accessory 3, pseudogene	GO:0006821 chloride transport;GO:0015698 inorganic anion transport;GO:0070588 calcium ion transmembrane transport							0.0	0.0	0.0	0.0	0.0	0.0	0.0	0.0	0.0	0.0	0.0	0.0	0.0	0.0	0.0	0.0	0.0	0.0	0.0	0.0
AOAH	313	symbol	H. sapiens	313	H. sapiens	AOAH	acyloxyacyl hydrolase	GO:0008653 lipopolysaccharide metabolic process;GO:0009104 lipopolysaccharide catabolic process;GO:0044247 cellular polysaccharide catabolic process		Predicted secreted proteins; Enzymes; ENZYME proteins:Hydrolases	Vesicles (Uncertain)				0.0	0.0	0.0	0.0	0.0	0.0	0.0	0.0	0.0	0.0	0.0	1.0	0.0	0.0	0.0	0.0	0.0	0.0	0.0	0.0
SNAI2	6591	symbol	H. sapiens	6591	H. sapiens	SNAI2	snail family transcriptional repressor 2	GO:0035921 desmosome disassembly;GO:0150147 cell-cell junction disassembly;GO:0070563 negative regulation of vitamin D receptor signaling pathway		Human disease related genes:Congenital disorders of metabolism:Congenital disorders of amino acid metabolism; Human disease related genes:Congenital disorders of metabolism:Other congenital disorders of metabolism; Disease related genes; Transcription factors:Zinc-coordinating DNA-binding domains; Predicted intracellular proteins	Nucleoplasm (Approved)		(M231)PID KIT PATHWAY; (M223)PID BETA CATENIN NUC PATHWAY; (M145)PID P53 DOWNSTREAM PATHWAY	(M5942)HALLMARK UV RESPONSE DN; (M5930)HALLMARK EPITHELIAL MESENCHYMAL TRANSITION	0.0	0.0	0.0	0.0	0.0	0.0	0.0	0.0	1.0	0.0	0.0	0.0	0.0	0.0	0.0	0.0	0.0	0.0	0.0	0.0
FGL2	10875	symbol	H. sapiens	10875	H. sapiens	FGL2	fibrinogen like 2	GO:0002616 regulation of macrophage antigen processing and presentation;GO:0002617 negative regulation of macrophage antigen processing and presentation;GO:0043381 negative regulation of memory T cell differentiation		Predicted secreted proteins			(M3008)NABA ECM GLYCOPROTEINS; (M5884)NABA CORE MATRISOME; (M5889)NABA MATRISOME	(M5947)HALLMARK IL2 STAT5 SIGNALING; (M5913)HALLMARK INTERFERON GAMMA RESPONSE; (M5924)HALLMARK MTORC1 SIGNALING	0.0	0.0	0.0	0.0	0.0	1.0	0.0	0.0	1.0	1.0	0.0	1.0	0.0	1.0	0.0	0.0	0.0	0.0	0.0	0.0
VNN2	8875	symbol	H. sapiens	8875	H. sapiens	VNN2	vanin 2	GO:0015939 pantothenate metabolic process;GO:0006767 water-soluble vitamin metabolic process;GO:0006766 vitamin metabolic process		Predicted intracellular proteins; Enzymes; ENZYME proteins:Hydrolases					0.0	0.0	0.0	0.0	0.0	0.0	0.0	0.0	0.0	0.0	0.0	0.0	0.0	0.0	0.0	0.0	0.0	0.0	0.0	0.0
TYROBP	7305	symbol	H. sapiens	7305	H. sapiens	TYROBP	transmembrane immune signaling adaptor TYROBP	GO:0110090 positive regulation of hippocampal neuron apoptotic process;GO:0002222 stimulatory killer cell immunoglobulin-like receptor signaling pathway;GO:0002282 microglial cell activation involved in immune response		Disease related genes; Human disease related genes:Congenital disorders of metabolism:Congenital disorders of lipid/glycolipid metabolism; Transporters:Accessory Factors Involved in Transport; Potential drug targets	Plasma membrane (Supported)				0.0	0.0	1.0	0.0	0.0	1.0	1.0	1.0	1.0	1.0	1.0	1.0	0.0	1.0	0.0	0.0	0.0	0.0	0.0	0.0
ZFP42	132625	symbol	H. sapiens	132625	H. sapiens	ZFP42	ZFP42 zinc finger protein	GO:0008585 female gonad development;GO:0046545 development of primary female sexual characteristics;GO:0046660 female sex differentiation		Transcription factors:Zinc-coordinating DNA-binding domains; Predicted intracellular proteins					0.0	0.0	0.0	0.0	0.0	0.0	0.0	0.0	0.0	0.0	0.0	0.0	0.0	0.0	0.0	0.0	0.0	0.0	0.0	0.0
TMEM255A	55026	symbol	H. sapiens	55026	H. sapiens	TMEM255A	transmembrane protein 255A	GO:0009617 response to bacterium;GO:0051707 response to other organism;GO:0043207 response to external biotic stimulus		Transporters	Nuclear bodies;Nucleoplasm (Uncertain)				0.0	0.0	0.0	1.0	0.0	0.0	0.0	0.0	0.0	0.0	0.0	0.0	0.0	0.0	0.0	0.0	0.0	0.0	0.0	0.0
LINC01550	388011	symbol	H. sapiens	388011	H. sapiens	LINC01550	long intergenic non-protein coding RNA 1550								0.0	0.0	0.0	0.0	0.0	0.0	0.0	0.0	0.0	0.0	0.0	0.0	0.0	0.0	0.0	0.0	0.0	0.0	0.0	0.0
FAM20A	54757	symbol	H. sapiens	54757	H. sapiens	FAM20A	FAM20A golgi associated secretory pathway pseudokinase	GO:0044691 tooth eruption;GO:0070166 enamel mineralization;GO:0034505 tooth mineralization		Disease related genes; Human disease related genes:Digestive system diseases:Mouth and dental diseases; Predicted intracellular proteins; Predicted secreted proteins			(M3468)NABA ECM REGULATORS; (M5885)NABA MATRISOME ASSOCIATED; (M5889)NABA MATRISOME		1.0	0.0	0.0	1.0	0.0	0.0	0.0	0.0	0.0	0.0	0.0	0.0	0.0	0.0	0.0	0.0	0.0	0.0	0.0	0.0
RP11-175P13.2						None	None	None	None	None	None	None	None	None	nan	nan	nan	nan	nan	nan	nan	nan	nan	nan	nan	nan	nan	nan	nan	nan	nan	nan	nan	nan
CXorf21	80231	gene_synonym	H. sapiens	80231	H. sapiens	TASL	TLR adaptor interacting with endolysosomal SLC15A4	GO:0034159 regulation of toll-like receptor 8 signaling pathway;GO:0034161 positive regulation of toll-like receptor 8 signaling pathway;GO:0034157 positive regulation of toll-like receptor 7 signaling pathway		Disease related genes; Predicted intracellular proteins	Nucleoplasm (Supported); Additional: Vesicles				0.0	0.0	0.0	0.0	0.0	0.0	1.0	0.0	0.0	1.0	0.0	1.0	0.0	0.0	0.0	0.0	0.0	0.0	0.0	0.0
KIAA0226L	80183	gene_synonym	H. sapiens	80183	H. sapiens	RUBCNL	rubicon like autophagy enhancer	GO:0061910 autophagosome-endosome fusion;GO:0061909 autophagosome-lysosome fusion;GO:0070873 regulation of glycogen metabolic process		Predicted intracellular proteins	Cytosol (Approved)				0.0	0.0	0.0	0.0	0.0	0.0	0.0	0.0	0.0	0.0	0.0	0.0	0.0	0.0	0.0	0.0	0.0	0.0	0.0	0.0
KRT17P1	147228	symbol	H. sapiens	147228	H. sapiens	KRT17P1	keratin 17 pseudogene 1								0.0	0.0	0.0	0.0	0.0	0.0	0.0	0.0	0.0	0.0	0.0	0.0	0.0	0.0	0.0	0.0	0.0	0.0	0.0	0.0
RP5-1028K7.2						None	None	None	None	None	None	None	None	None	nan	nan	nan	nan	nan	nan	nan	nan	nan	nan	nan	nan	nan	nan	nan	nan	nan	nan	nan	nan
AC003092.1						None	None	None	None	None	None	None	None	None	nan	nan	nan	nan	nan	nan	nan	nan	nan	nan	nan	nan	nan	nan	nan	nan	nan	nan	nan	nan
RASSF9	9182	symbol	H. sapiens	9182	H. sapiens	RASSF9	Ras association domain family member 9	GO:0016197 endosomal transport;GO:0006605 protein targeting;GO:0006886 intracellular protein transport		Predicted intracellular proteins					0.0	0.0	0.0	0.0	0.0	0.0	0.0	0.0	0.0	0.0	0.0	0.0	0.0	0.0	0.0	0.0	0.0	0.0	0.0	0.0
NAPSB	256236	symbol	H. sapiens	256236	H. sapiens	NAPSB	napsin B aspartic peptidase, pseudogene								0.0	0.0	0.0	0.0	0.0	0.0	0.0	0.0	0.0	0.0	0.0	0.0	0.0	0.0	0.0	0.0	0.0	0.0	0.0	0.0
PARVG	64098	symbol	H. sapiens	64098	H. sapiens	PARVG	parvin gamma	GO:0034446 substrate adhesion-dependent cell spreading;GO:0031532 actin cytoskeleton reorganization;GO:0007160 cell-matrix adhesion		Predicted intracellular proteins			(M71)PID ILK PATHWAY		0.0	0.0	0.0	0.0	0.0	0.0	0.0	0.0	0.0	0.0	0.0	0.0	0.0	0.0	0.0	0.0	0.0	0.0	0.0	0.0
TGFBI	7045	symbol	H. sapiens	7045	H. sapiens	TGFBI	transforming growth factor beta induced	GO:0002062 chondrocyte differentiation;GO:0051216 cartilage development;GO:0061448 connective tissue development		Disease related genes; Predicted intracellular proteins; Predicted secreted proteins; Human disease related genes:Nervous system diseases:Eye disease			(M169)PID INTEGRIN2 PATHWAY; (M53)PID INTEGRIN3 PATHWAY; (M18)PID INTEGRIN1 PATHWAY	(M5891)HALLMARK HYPOXIA; (M5915)HALLMARK APICAL JUNCTION; (M5930)HALLMARK EPITHELIAL MESENCHYMAL TRANSITION	0.0	0.0	0.0	0.0	0.0	0.0	0.0	0.0	1.0	0.0	0.0	0.0	0.0	0.0	0.0	0.0	0.0	0.0	0.0	0.0
KCNIP3	30818	symbol	H. sapiens	30818	H. sapiens	KCNIP3	potassium voltage-gated channel interacting protein 3	GO:1901379 regulation of potassium ion transmembrane transport;GO:0043266 regulation of potassium ion transport;GO:0071805 potassium ion transmembrane transport		Predicted intracellular proteins; Transporters:Accessory Factors Involved in Transport	Vesicles (Approved)			(M5921)HALLMARK COMPLEMENT	0.0	0.0	0.0	0.0	0.0	0.0	0.0	0.0	0.0	0.0	0.0	0.0	0.0	0.0	0.0	0.0	0.0	0.0	0.0	0.0
LILRB5	10990	symbol	H. sapiens	10990	H. sapiens	LILRB5	leukocyte immunoglobulin like receptor B5	GO:0019221 cytokine-mediated signaling pathway;GO:0002250 adaptive immune response;GO:0071345 cellular response to cytokine stimulus		CD markers					0.0	1.0	1.0	0.0	0.0	0.0	0.0	1.0	0.0	0.0	0.0	0.0	0.0	0.0	0.0	0.0	0.0	0.0	0.0	0.0
SLC36A2	153201	symbol	H. sapiens	153201	H. sapiens	SLC36A2	solute carrier family 36 member 2	GO:0015824 proline transport;GO:0035524 proline transmembrane transport;GO:0015808 L-alanine transport		Human disease related genes:Congenital disorders of metabolism:Congenital disorders of amino acid metabolism; Transporters:Electrochemical Potential-driven transporters; Disease related genes; Potential drug targets; Human disease related genes:Urinary system diseases:Kidney diseases					0.0	0.0	0.0	0.0	0.0	0.0	0.0	0.0	0.0	0.0	0.0	0.0	0.0	0.0	0.0	0.0	0.0	0.0	0.0	0.0
MLIP	90523	symbol	H. sapiens	90523	H. sapiens	MLIP	muscular LMNA interacting protein	GO:0010616 negative regulation of cardiac muscle adaptation;GO:1903243 negative regulation of cardiac muscle hypertrophy in response to stress;GO:0014745 negative regulation of muscle adaptation		Disease related genes; Predicted intracellular proteins	Nucleoplasm (Approved)				0.0	0.0	0.0	0.0	0.0	0.0	0.0	0.0	0.0	0.0	0.0	0.0	0.0	0.0	0.0	0.0	0.0	0.0	0.0	0.0
TBC1D10C	374403	symbol	H. sapiens	374403	H. sapiens	TBC1D10C	TBC1 domain family member 10C	GO:0070885 negative regulation of calcineurin-NFAT signaling cascade;GO:0106057 negative regulation of calcineurin-mediated signaling;GO:0050849 negative regulation of calcium-mediated signaling		Predicted intracellular proteins	Nuclear bodies (Approved)				0.0	0.0	0.0	0.0	0.0	0.0	0.0	0.0	1.0	0.0	0.0	0.0	0.0	0.0	0.0	0.0	0.0	0.0	0.0	0.0
GNLY	10578	symbol	H. sapiens	10578	H. sapiens	GNLY	granulysin	GO:0031640 killing of cells of another organism;GO:0050832 defense response to fungus;GO:0006968 cellular defense response		Predicted intracellular proteins; Predicted secreted proteins; Transporters:Transporter channels and pores		3-(N-morpholino)propanesulfonic acid			0.0	0.0	0.0	1.0	0.0	0.0	0.0	0.0	0.0	0.0	0.0	0.0	0.0	0.0	1.0	0.0	0.0	0.0	0.0	0.0
IRX5	10265	symbol	H. sapiens	10265	H. sapiens	IRX5	iroquois homeobox 5	GO:0048701 embryonic cranial skeleton morphogenesis;GO:1904888 cranial skeletal system development;GO:0048704 embryonic skeletal system morphogenesis		Disease related genes; Transcription factors:Helix-turn-helix domains; Predicted intracellular proteins; Human disease related genes:Congenital malformations:Other congenital malformations	Nuclear speckles (Approved); Additional: Cytosol;Microtubules				0.0	0.0	0.0	0.0	0.0	0.0	0.0	0.0	0.0	0.0	0.0	0.0	0.0	0.0	0.0	0.0	0.0	0.0	0.0	0.0
VPREB3	29802	symbol	H. sapiens	29802	H. sapiens	VPREB3	V-set pre-B cell surrogate light chain 3	GO:0002377 immunoglobulin production;GO:0002440 production of molecular mediator of immune response;GO:0006955 immune response		Predicted intracellular proteins					0.0	0.0	0.0	0.0	0.0	0.0	0.0	0.0	0.0	0.0	0.0	0.0	0.0	0.0	0.0	0.0	0.0	0.0	0.0	0.0
PKIA	5569	symbol	H. sapiens	5569	H. sapiens	PKIA	cAMP-dependent protein kinase inhibitor alpha	GO:2000480 negative regulation of cAMP-dependent protein kinase activity;GO:0042308 negative regulation of protein import into nucleus;GO:2000479 regulation of cAMP-dependent protein kinase activity		Predicted intracellular proteins		3,5-Diiodotyrosine; Hydroxyfasudil; (2S)-1-(3H-Indol-3-yl)-3-{[5-(6-isoquinolinyl)-3-pyridinyl]oxy}-2-propanamine; (1S)-2-(1H-INDOL-3-YL)-1-[({5-[(E)-2-PYRIDIN-4-YLVINYL]PYRIDIN-3-YL}OXY)METHYL]ETHYLAMINE; (1S)-1-(1H-INDOL-3-YLMETHYL)-2-(2-PYRIDIN-4-YL-[1,7]NAPHTYRIDIN-5-YLOXY)-EHYLAMINE; (4R,2S)-5'-(4-(4-CHLOROBENZYLOXY)PYRROLIDIN-2-YLMETHANESULFONYL)ISOQUINOLINE; N-METHYL-1-[4-(9H-PURIN-6-YL)PH…		(M5909)HALLMARK MYOGENESIS	0.0	0.0	0.0	0.0	0.0	0.0	0.0	0.0	0.0	0.0	0.0	0.0	0.0	0.0	0.0	0.0	0.0	0.0	0.0	0.0
NKG7	4818	symbol	H. sapiens	4818	H. sapiens	NKG7	natural killer cell granule protein 7	GO:0002420 natural killer cell mediated cytotoxicity directed against tumor cell target;GO:0002423 natural killer cell mediated immune response to tumor cell;GO:0140507 granzyme-mediated programmed cell death signaling pathway		Predicted intracellular proteins	Vesicles (Approved)				0.0	0.0	1.0	0.0	0.0	1.0	0.0	0.0	0.0	1.0	0.0	1.0	0.0	0.0	0.0	0.0	0.0	0.0	1.0	0.0
RP11-416L21.2						None	None	None	None	None	None	None	None	None	nan	nan	nan	nan	nan	nan	nan	nan	nan	nan	nan	nan	nan	nan	nan	nan	nan	nan	nan	nan
CD80	941	symbol	H. sapiens	941	H. sapiens	CD80	CD80 molecule	GO:0045627 positive regulation of T-helper 1 cell differentiation;GO:0045625 regulation of T-helper 1 cell differentiation;GO:0032725 positive regulation of granulocyte macrophage colony-stimulating factor production		Predicted intracellular proteins; FDA approved drug targets:Biotech drugs; CD markers		Abatacept; Galiximab; Belatacept	(M290)PID IL12 STAT4 PATHWAY; (M88)PID CD8 TCR PATHWAY; (M34)PID TCR PATHWAY	(M5890)HALLMARK TNFA SIGNALING VIA NFKB; (M5950)HALLMARK ALLOGRAFT REJECTION; (M5956)HALLMARK KRAS SIGNALING DN	0.0	0.0	1.0	1.0	0.0	0.0	1.0	1.0	1.0	0.0	1.0	0.0	0.0	1.0	0.0	1.0	0.0	0.0	0.0	0.0
ACTL6B	51412	symbol	H. sapiens	51412	H. sapiens	ACTL6B	actin like 6B	GO:2000819 regulation of nucleotide-excision repair;GO:0042551 neuron maturation;GO:0070316 regulation of G0 to G1 transition		Disease related genes; Predicted intracellular proteins; Human disease related genes:Nervous system diseases:Epilepsy; Human disease related genes:Other diseases:Mental and behavioural disorders	Mitotic chromosome;Nucleoli rim (Approved)				0.0	0.0	0.0	0.0	0.0	0.0	0.0	0.0	1.0	0.0	0.0	0.0	0.0	0.0	0.0	0.0	0.0	0.0	0.0	0.0
SPRR2C	6702	symbol	H. sapiens	6702	H. sapiens	SPRR2C	small proline rich protein 2C (pseudogene)								0.0	0.0	0.0	0.0	0.0	0.0	0.0	0.0	0.0	0.0	0.0	0.0	0.0	0.0	0.0	0.0	0.0	0.0	0.0	0.0
NTSR1	4923	symbol	H. sapiens	4923	H. sapiens	NTSR1	neurotensin receptor 1	GO:0014054 positive regulation of gamma-aminobutyric acid secretion;GO:0070777 D-aspartate transport;GO:0070779 D-aspartate import across plasma membrane		G-protein coupled receptors:GPCRs excl olfactory receptors; Transporters	Plasma membrane (Supported)				0.0	0.0	0.0	0.0	0.0	0.0	0.0	0.0	0.0	0.0	0.0	0.0	1.0	0.0	0.0	0.0	0.0	0.0	0.0	0.0
HMGA2	8091	symbol	H. sapiens	8091	H. sapiens	HMGA2	high mobility group AT-hook 2	GO:0003131 mesodermal-endodermal cell signaling;GO:2000685 positive regulation of cellular response to X-ray;GO:2000683 regulation of cellular response to X-ray		Transcription factors:beta-Sheet binding to DNA; Human disease related genes:Reproductive system diseases:Reproductive system diseases; Disease related genes; Predicted intracellular proteins; Cancer-related genes:Candidate cancer biomarkers	Nucleoli;Nucleoli rim;Nucleoplasm (Supported)				0.0	0.0	0.0	0.0	0.0	0.0	0.0	0.0	0.0	0.0	0.0	0.0	0.0	0.0	0.0	0.0	0.0	0.0	0.0	0.0
SLC16A1-AS1	100506392	symbol	H. sapiens	100506392	H. sapiens	SLC16A1-AS1	SLC16A1 antisense RNA 1								0.0	0.0	0.0	0.0	0.0	0.0	0.0	0.0	0.0	0.0	0.0	0.0	0.0	0.0	0.0	0.0	0.0	0.0	0.0	0.0
TLR6	10333	symbol	H. sapiens	10333	H. sapiens	TLR6	toll like receptor 6	GO:0034150 toll-like receptor 6 signaling pathway;GO:0038124 toll-like receptor TLR6:TLR2 signaling pathway;GO:0042496 detection of diacyl bacterial lipopeptide		Enzymes; ENZYME proteins:Hydrolases; CD markers	Endoplasmic reticulum (Approved)		(M264)PID TOLL ENDOGENOUS PATHWAY	(M5950)HALLMARK ALLOGRAFT REJECTION	0.0	0.0	1.0	1.0	0.0	1.0	1.0	1.0	1.0	0.0	1.0	0.0	0.0	0.0	0.0	0.0	0.0	0.0	0.0	0.0
HSPA7	3311	symbol	H. sapiens	3311	H. sapiens	HSPA7	heat shock protein family A (Hsp70) member 7 (pseudogene)	GO:0042026 protein refolding;GO:0051085 chaperone cofactor-dependent protein refolding;GO:0051084 'de novo' post-translational protein folding							0.0	0.0	0.0	0.0	0.0	0.0	0.0	0.0	0.0	0.0	0.0	0.0	0.0	0.0	0.0	0.0	0.0	0.0	0.0	0.0
SPRR2D	6703	symbol	H. sapiens	6703	H. sapiens	SPRR2D	small proline rich protein 2D	GO:0031424 keratinization;GO:0030216 keratinocyte differentiation;GO:0009913 epidermal cell differentiation		Predicted intracellular proteins					0.0	0.0	0.0	0.0	1.0	0.0	0.0	0.0	0.0	0.0	0.0	0.0	0.0	0.0	0.0	0.0	0.0	0.0	0.0	0.0
CTD-2006K23.1						None	None	None	None	None	None	None	None	None	nan	nan	nan	nan	nan	nan	nan	nan	nan	nan	nan	nan	nan	nan	nan	nan	nan	nan	nan	nan
MPEG1	219972	symbol	H. sapiens	219972	H. sapiens	MPEG1	macrophage expressed 1	GO:0035915 pore formation in membrane of another organism;GO:0051673 membrane disruption in another organism;GO:0035821 modulation of process of another organism		Predicted secreted proteins; Transporters:Transporter channels and pores					0.0	0.0	0.0	1.0	0.0	0.0	0.0	0.0	0.0	0.0	0.0	0.0	0.0	0.0	0.0	0.0	0.0	0.0	0.0	0.0
CTC-499B15.6						None	None	None	None	None	None	None	None	None	nan	nan	nan	nan	nan	nan	nan	nan	nan	nan	nan	nan	nan	nan	nan	nan	nan	nan	nan	nan
BRINP1	1620	symbol	H. sapiens	1620	H. sapiens	BRINP1	BMP/retinoic acid inducible neural specific 1	GO:0042711 maternal behavior;GO:0007614 short-term memory;GO:0060746 parental behavior		Predicted intracellular proteins; Transporters:Transporter channels and pores	Microtubules (Uncertain)				0.0	0.0	0.0	1.0	0.0	0.0	0.0	0.0	0.0	0.0	0.0	0.0	0.0	0.0	0.0	0.0	0.0	0.0	0.0	0.0
PON3	5446	symbol	H. sapiens	5446	H. sapiens	PON3	paraoxonase 3	GO:0010124 phenylacetate catabolic process;GO:0046226 coumarin catabolic process;GO:0046271 phenylpropanoid catabolic process		Predicted secreted proteins; Enzymes; ENZYME proteins:Hydrolases; Candidate cardiovascular disease genes					0.0	0.0	0.0	0.0	0.0	0.0	0.0	0.0	0.0	0.0	0.0	0.0	0.0	0.0	0.0	0.0	0.0	0.0	0.0	0.0
LINC01215	101929623	symbol	H. sapiens	101929623	H. sapiens	LINC01215	long intergenic non-protein coding RNA 1215								0.0	0.0	0.0	0.0	0.0	0.0	0.0	0.0	0.0	0.0	0.0	0.0	0.0	0.0	0.0	0.0	0.0	0.0	0.0	0.0
OLFM1	10439	symbol	H. sapiens	10439	H. sapiens	OLFM1	olfactomedin 1	GO:0023041 neuronal signal transduction;GO:0003190 atrioventricular valve formation;GO:0003188 heart valve formation		Predicted intracellular proteins; Predicted secreted proteins	Nucleoli (Approved); Additional: Cytosol;Nucleoplasm			(M5941)HALLMARK UV RESPONSE UP; (M5906)HALLMARK ESTROGEN RESPONSE EARLY; (M5907)HALLMARK ESTROGEN RESPONSE LATE	0.0	0.0	0.0	0.0	0.0	0.0	0.0	0.0	0.0	0.0	0.0	0.0	0.0	0.0	0.0	0.0	0.0	0.0	0.0	0.0
SNX20	124460	symbol	H. sapiens	124460	H. sapiens	SNX20	sorting nexin 20	GO:0015031 protein transport;GO:0045184 establishment of protein localization;GO:0071705 nitrogen compound transport		Predicted intracellular proteins	Nucleoplasm (Uncertain)				0.0	0.0	0.0	0.0	0.0	0.0	0.0	0.0	0.0	0.0	0.0	0.0	0.0	0.0	0.0	0.0	0.0	0.0	0.0	0.0
SPTA1	6708	symbol	H. sapiens	6708	H. sapiens	SPTA1	spectrin alpha, erythrocytic 1	GO:0006779 porphyrin-containing compound biosynthetic process;GO:0033014 tetrapyrrole biosynthetic process;GO:0051693 actin filament capping		Disease related genes; Predicted intracellular proteins; Human disease related genes:Cardiovascular diseases:Hematologic diseases				(M5945)HALLMARK HEME METABOLISM	0.0	0.0	0.0	0.0	1.0	1.0	0.0	0.0	1.0	0.0	0.0	0.0	0.0	0.0	0.0	0.0	0.0	0.0	0.0	0.0
RP11-73M7.1						None	None	None	None	None	None	None	None	None	nan	nan	nan	nan	nan	nan	nan	nan	nan	nan	nan	nan	nan	nan	nan	nan	nan	nan	nan	nan
RP11-594N15.2						None	None	None	None	None	None	None	None	None	nan	nan	nan	nan	nan	nan	nan	nan	nan	nan	nan	nan	nan	nan	nan	nan	nan	nan	nan	nan
ATOH1	474	symbol	H. sapiens	474	H. sapiens	ATOH1	atonal bHLH transcription factor 1	GO:0042667 auditory receptor cell fate specification;GO:0042668 auditory receptor cell fate determination;GO:0045609 positive regulation of inner ear auditory receptor cell differentiation		Transcription factors:Basic domains; Predicted intracellular proteins; Cancer-related genes:Candidate cancer biomarkers	Mitochondria (Approved); Additional: Cytosol;Nucleoplasm				0.0	0.0	1.0	0.0	1.0	0.0	0.0	0.0	0.0	0.0	0.0	0.0	0.0	0.0	0.0	0.0	0.0	0.0	0.0	0.0
PDPN	10630	symbol	H. sapiens	10630	H. sapiens	PDPN	podoplanin	GO:1904328 regulation of myofibroblast contraction;GO:0060838 lymphatic endothelial cell fate commitment;GO:0060839 endothelial cell fate commitment			Plasma membrane (Supported); Additional: Cell Junctions;Mitochondria			(M5932)HALLMARK INFLAMMATORY RESPONSE	0.0	0.0	0.0	0.0	1.0	1.0	0.0	0.0	1.0	0.0	0.0	0.0	0.0	0.0	0.0	0.0	0.0	1.0	0.0	0.0
SELPLG	6404	symbol	H. sapiens	6404	H. sapiens	SELPLG	selectin P ligand	GO:0050902 leukocyte adhesive activation;GO:0050901 leukocyte tethering or rolling;GO:0061756 leukocyte adhesion to vascular endothelial cell		Candidate cardiovascular disease genes; CD markers	Vesicles (Approved)		(M159)PID AMB2 NEUTROPHILS PATHWAY		0.0	0.0	1.0	0.0	0.0	1.0	0.0	0.0	0.0	0.0	0.0	0.0	0.0	0.0	0.0	0.0	0.0	1.0	0.0	0.0
NKX2-5	1482	symbol	H. sapiens	1482	H. sapiens	NKX2-5	NK2 homeobox 5	GO:0003168 Purkinje myocyte differentiation;GO:0003342 proepicardium development;GO:0003343 septum transversum development		Human disease related genes:Endocrine and metabolic diseases:Thyroid gland diseases; Human disease related genes:Congenital malformations:Congenital malformations of the circulatory system; Human disease related genes:Cardiovascular diseases:Cardiac diseases; Disease related genes; Transcription factors:Helix-turn-helix domains; Predicted intracellular proteins	Nucleoplasm (Approved); Additional: Cytosol		(M2)PID SMAD2 3NUCLEAR PATHWAY	(M5941)HALLMARK UV RESPONSE UP	0.0	0.0	0.0	0.0	1.0	1.0	0.0	0.0	0.0	0.0	0.0	0.0	0.0	0.0	0.0	0.0	0.0	0.0	0.0	0.0
KNDC1	85442	symbol	H. sapiens	85442	H. sapiens	KNDC1	kinase non-catalytic C-lobe domain containing 1	GO:0021684 cerebellar granular layer formation;GO:0021707 cerebellar granule cell differentiation;GO:0021683 cerebellar granular layer morphogenesis		Predicted intracellular proteins	Cytosol;Plasma membrane (Approved); Additional: Vesicles				0.0	0.0	0.0	0.0	0.0	0.0	0.0	0.0	0.0	0.0	0.0	0.0	0.0	0.0	0.0	0.0	0.0	0.0	0.0	0.0
MT1E	4493	symbol	H. sapiens	4493	H. sapiens	MT1E	metallothionein 1E	GO:0010273 detoxification of copper ion;GO:1990169 stress response to copper ion;GO:0061687 detoxification of inorganic compound		Predicted intracellular proteins	Nucleoplasm (Approved)			(M5942)HALLMARK UV RESPONSE DN; (M5891)HALLMARK HYPOXIA	0.0	0.0	0.0	0.0	0.0	0.0	0.0	0.0	0.0	0.0	0.0	0.0	0.0	0.0	0.0	0.0	0.0	0.0	0.0	0.0
LEAP2	116842	symbol	H. sapiens	116842	H. sapiens	LEAP2	liver enriched antimicrobial peptide 2	GO:0061844 antimicrobial humoral immune response mediated by antimicrobial peptide;GO:0019730 antimicrobial humoral response;GO:0006959 humoral immune response		Predicted secreted proteins				(M5934)HALLMARK XENOBIOTIC METABOLISM	0.0	0.0	0.0	1.0	0.0	0.0	0.0	0.0	0.0	0.0	0.0	0.0	0.0	0.0	1.0	0.0	0.0	0.0	0.0	0.0
PNLIPRP3	119548	symbol	H. sapiens	119548	H. sapiens	PNLIPRP3	pancreatic lipase related protein 3	GO:0016042 lipid catabolic process;GO:0006629 lipid metabolic process;GO:1901575 organic substance catabolic process		Predicted secreted proteins; Enzymes; ENZYME proteins:Hydrolases					0.0	0.0	0.0	0.0	0.0	0.0	0.0	0.0	0.0	0.0	0.0	0.0	0.0	0.0	0.0	0.0	0.0	0.0	0.0	0.0
ALB	213	symbol	H. sapiens	213	H. sapiens	ALB	albumin	GO:0051659 maintenance of mitochondrion location;GO:0051657 maintenance of organelle location;GO:0051646 mitochondrion localization		Predicted secreted proteins; Candidate cardiovascular disease genes; Disease related genes; Cancer-related genes:Candidate cancer biomarkers; Predicted intracellular proteins; FDA approved drug targets:Small molecule drugs	Golgi apparatus (Enhanced); Additional: Endoplasmic reticulum	Amsacrine; Cefotaxime; Pyridostigmine; Phenol; Norelgestromin; Aniline; Guaiacol; Artenimol; Silver; Patent Blue	(M106)PID HNF3B PATHWAY	(M5949)HALLMARK PEROXISOME	0.0	0.0	1.0	0.0	0.0	0.0	0.0	0.0	0.0	0.0	0.0	0.0	0.0	0.0	0.0	0.0	0.0	0.0	0.0	0.0
TMPRSS11A	339967	symbol	H. sapiens	339967	H. sapiens	TMPRSS11A	transmembrane serine protease 11A	GO:0007049 cell cycle;GO:0006508 proteolysis;GO:0019538 protein metabolic process		Peptidases:Serine-type peptidases; Enzymes; Transporters:Accessory Factors Involved in Transport					0.0	0.0	0.0	0.0	0.0	0.0	0.0	0.0	0.0	0.0	0.0	0.0	0.0	0.0	0.0	0.0	0.0	0.0	0.0	0.0
C5orf38	153571	symbol	H. sapiens	153571	H. sapiens	C5orf38	chromosome 5 open reading frame 38								0.0	0.0	0.0	0.0	0.0	0.0	0.0	0.0	0.0	0.0	0.0	0.0	0.0	0.0	0.0	0.0	0.0	0.0	0.0	0.0
IGSF21	84966	symbol	H. sapiens	84966	H. sapiens	IGSF21	immunoglobin superfamily member 21	GO:0060074 synapse maturation;GO:0007157 heterophilic cell-cell adhesion via plasma membrane cell adhesion molecules;GO:0007156 homophilic cell adhesion via plasma membrane adhesion molecules		Predicted intracellular proteins					0.0	0.0	0.0	0.0	0.0	0.0	0.0	0.0	0.0	0.0	0.0	0.0	0.0	0.0	0.0	0.0	0.0	1.0	0.0	0.0
SERPINB3	6317	symbol	H. sapiens	6317	H. sapiens	SERPINB3	serpin family B member 3	GO:0038001 paracrine signaling;GO:0035425 autocrine signaling;GO:0043508 negative regulation of JUN kinase activity		Predicted intracellular proteins; Cancer-related genes:Candidate cancer biomarkers	Cytosol (Approved); Additional: Plasma membrane	D-Serine; Dexfosfoserine	(M3468)NABA ECM REGULATORS; (M5885)NABA MATRISOME ASSOCIATED; (M5889)NABA MATRISOME		1.0	0.0	0.0	0.0	0.0	0.0	0.0	0.0	0.0	0.0	0.0	0.0	0.0	0.0	0.0	0.0	0.0	0.0	0.0	0.0
PDE1B	5153	symbol	H. sapiens	5153	H. sapiens	PDE1B	phosphodiesterase 1B	GO:0036005 response to macrophage colony-stimulating factor;GO:0036006 cellular response to macrophage colony-stimulating factor stimulus;GO:0097011 cellular response to granulocyte macrophage colony-stimulating factor stimulus		FDA approved drug targets:Small molecule drugs; Predicted intracellular proteins; Enzymes; ENZYME proteins:Hydrolases		Caffeine; Nicardipine; Felodipine; Bepridil; S,S-(2-Hydroxyethyl)Thiocysteine			0.0	0.0	1.0	0.0	0.0	1.0	0.0	0.0	0.0	0.0	0.0	0.0	1.0	0.0	0.0	0.0	0.0	0.0	0.0	0.0
IL12A	3592	symbol	H. sapiens	3592	H. sapiens	IL12A	interleukin 12A	GO:0002860 positive regulation of natural killer cell mediated cytotoxicity directed against tumor cell target;GO:0002857 positive regulation of natural killer cell mediated immune response to tumor cell;GO:0002858 regulation of natural killer cell mediated cytotoxicity directed against tumor cell target		Predicted secreted proteins; Cancer-related genes:Candidate cancer biomarkers			(M36)PID IL27 PATHWAY; (M54)PID IL12 2PATHWAY; (M5883)NABA SECRETED FACTORS	(M5950)HALLMARK ALLOGRAFT REJECTION	1.0	0.0	1.0	1.0	0.0	0.0	1.0	0.0	1.0	1.0	1.0	1.0	0.0	1.0	0.0	1.0	0.0	0.0	0.0	0.0
FOXO6	100132074	symbol	H. sapiens	100132074	H. sapiens	FOXO6	forkhead box O6	GO:0060999 positive regulation of dendritic spine development;GO:0060998 regulation of dendritic spine development;GO:0007613 memory		Predicted intracellular proteins					0.0	0.0	0.0	0.0	0.0	0.0	0.0	0.0	0.0	0.0	0.0	0.0	0.0	0.0	0.0	0.0	0.0	0.0	0.0	0.0
CFI	3426	symbol	H. sapiens	3426	H. sapiens	CFI	complement factor I	GO:0006958 complement activation, classical pathway;GO:0002455 humoral immune response mediated by circulating immunoglobulin;GO:0006956 complement activation		Peptidases:Serine-type peptidases; ENZYME proteins:Hydrolases; Predicted secreted proteins; Human disease related genes:Nervous system diseases:Eye disease; Disease related genes; Human disease related genes:Cardiovascular diseases:Hematologic diseases; Human disease related genes:Immune system diseases:Primary immunodeficiency; Enzymes; Potential drug targets		Zinc; Copper; Zinc acetate		(M5946)HALLMARK COAGULATION	0.0	1.0	1.0	0.0	0.0	1.0	1.0	0.0	0.0	0.0	0.0	0.0	0.0	0.0	1.0	0.0	0.0	0.0	1.0	0.0
ZBTB8B	728116	symbol	H. sapiens	728116	H. sapiens	ZBTB8B	zinc finger and BTB domain containing 8B	GO:0006357 regulation of transcription by RNA polymerase II;GO:0006355 regulation of transcription, DNA-templated;GO:1903506 regulation of nucleic acid-templated transcription		Transcription factors:Zinc-coordinating DNA-binding domains; Predicted intracellular proteins	Nucleoplasm (Approved); Additional: Cytosol				0.0	0.0	0.0	0.0	0.0	0.0	0.0	0.0	0.0	0.0	0.0	0.0	0.0	0.0	0.0	0.0	0.0	0.0	0.0	0.0
S1PR4	8698	symbol	H. sapiens	8698	H. sapiens	S1PR4	sphingosine-1-phosphate receptor 4	GO:0003376 sphingosine-1-phosphate receptor signaling pathway;GO:0090520 sphingolipid mediated signaling pathway;GO:0007202 activation of phospholipase C activity		G-protein coupled receptors:GPCRs excl olfactory receptors; G-protein coupled receptors:Lysolipids receptors	Mitochondria (Supported)	Fingolimod	(M64)PID S1P S1P4 PATHWAY; (M155)PID S1P META PATHWAY		0.0	0.0	0.0	0.0	0.0	0.0	0.0	0.0	0.0	0.0	0.0	0.0	1.0	0.0	0.0	0.0	0.0	0.0	0.0	0.0
C1QC	714	symbol	H. sapiens	714	H. sapiens	C1QC	complement C1q C chain	GO:0045650 negative regulation of macrophage differentiation;GO:0030853 negative regulation of granulocyte differentiation;GO:0098883 synapse pruning		Disease related genes; Human disease related genes:Immune system diseases:Primary immunodeficiency; Predicted secreted proteins		Cetuximab; Palivizumab; Daclizumab; Bevacizumab; Zinc; Copper; Zinc acetate; Zinc chloride; Zinc sulfate, unspecified form	(M5880)NABA ECM AFFILIATED; (M5885)NABA MATRISOME ASSOCIATED; (M5889)NABA MATRISOME	(M5921)HALLMARK COMPLEMENT	1.0	1.0	0.0	0.0	0.0	1.0	1.0	0.0	1.0	0.0	0.0	0.0	0.0	0.0	1.0	0.0	0.0	0.0	1.0	1.0
RNASE6	6039	symbol	H. sapiens	6039	H. sapiens	RNASE6	ribonuclease A family member k6	GO:0019731 antibacterial humoral response;GO:0061844 antimicrobial humoral immune response mediated by antimicrobial peptide;GO:0050829 defense response to Gram-negative bacterium		Predicted secreted proteins					0.0	0.0	0.0	1.0	0.0	0.0	0.0	0.0	0.0	0.0	0.0	0.0	0.0	0.0	1.0	0.0	0.0	0.0	0.0	0.0
ADH7	131	symbol	H. sapiens	131	H. sapiens	ADH7	alcohol dehydrogenase 7 (class IV), mu or sigma polypeptide	GO:0010430 fatty acid omega-oxidation;GO:0006069 ethanol oxidation;GO:0006067 ethanol metabolic process		ENZYME proteins:Oxidoreductases; Predicted intracellular proteins; Enzymes	Cytosol;Plasma membrane (Supported)	NADH		(M5935)HALLMARK FATTY ACID METABOLISM; (M5934)HALLMARK XENOBIOTIC METABOLISM	0.0	0.0	0.0	1.0	0.0	0.0	0.0	0.0	0.0	0.0	0.0	0.0	0.0	0.0	0.0	0.0	0.0	0.0	0.0	0.0
IL10RA	3587	symbol	H. sapiens	3587	H. sapiens	IL10RA	interleukin 10 receptor subunit alpha	GO:0070086 ubiquitin-dependent endocytosis;GO:0046427 positive regulation of receptor signaling pathway via JAK-STAT;GO:1904894 positive regulation of receptor signaling pathway via STAT		Disease related genes; Human disease related genes:Immune system diseases:Other immune system diseases; CD markers	Plasma membrane (Supported); Additional: Cytosol			(M5947)HALLMARK IL2 STAT5 SIGNALING; (M5913)HALLMARK INTERFERON GAMMA RESPONSE; (M5932)HALLMARK INFLAMMATORY RESPONSE	0.0	0.0	1.0	1.0	0.0	0.0	0.0	0.0	0.0	0.0	0.0	0.0	0.0	0.0	0.0	0.0	0.0	0.0	0.0	0.0
GPR84	53831	symbol	H. sapiens	53831	H. sapiens	GPR84	G protein-coupled receptor 84	GO:0007218 neuropeptide signaling pathway;GO:0007186 G protein-coupled receptor signaling pathway;GO:0007165 signal transduction		G-protein coupled receptors:GPCRs excl olfactory receptors					0.0	0.0	0.0	0.0	0.0	0.0	0.0	0.0	0.0	0.0	0.0	0.0	1.0	0.0	0.0	0.0	0.0	0.0	0.0	0.0
KRT14	3861	symbol	H. sapiens	3861	H. sapiens	KRT14	keratin 14	GO:0045110 intermediate filament bundle assembly;GO:0045109 intermediate filament organization;GO:0045104 intermediate filament cytoskeleton organization		Disease related genes; Human disease related genes:Congenital malformations:Congenital malformations of skin; Predicted intracellular proteins; Cancer-related genes:Candidate cancer biomarkers	Intermediate filaments (Enhanced)	Zinc; Zinc acetate	(M236)PID DELTA NP63 PATHWAY; (M115)PID REG GR PATHWAY		0.0	0.0	0.0	0.0	1.0	0.0	0.0	0.0	0.0	0.0	0.0	0.0	0.0	0.0	0.0	0.0	0.0	0.0	0.0	0.0
GTF2IRD2P1	401375	symbol	H. sapiens	401375	H. sapiens	GTF2IRD2P1	GTF2I repeat domain containing 2 pseudogene 1								0.0	0.0	0.0	0.0	0.0	0.0	0.0	0.0	0.0	0.0	0.0	0.0	0.0	0.0	0.0	0.0	0.0	0.0	0.0	0.0
SERPINB13	5275	symbol	H. sapiens	5275	H. sapiens	SERPINB13	serpin family B member 13	GO:1902173 negative regulation of keratinocyte apoptotic process;GO:1902172 regulation of keratinocyte apoptotic process;GO:1904036 negative regulation of epithelial cell apoptotic process		Predicted intracellular proteins; Cancer-related genes:Mutated cancer genes	Cytosol;Nuclear speckles (Approved)		(M3468)NABA ECM REGULATORS; (M5885)NABA MATRISOME ASSOCIATED; (M5889)NABA MATRISOME		1.0	0.0	0.0	0.0	0.0	0.0	0.0	0.0	0.0	0.0	0.0	0.0	0.0	0.0	0.0	0.0	0.0	0.0	0.0	0.0
TNFSF13B	10673	symbol	H. sapiens	10673	H. sapiens	TNFSF13B	TNF superfamily member 13b	GO:0002636 positive regulation of germinal center formation;GO:0031296 B cell costimulation;GO:0002634 regulation of germinal center formation		Predicted secreted proteins; CD markers; Predicted intracellular proteins; Cancer-related genes:Candidate cancer biomarkers; FDA approved drug targets:Biotech drugs	Plasma membrane (Supported); Additional: Focal adhesion sites;Vesicles	1,4-Dioxane; Belimumab	(M5883)NABA SECRETED FACTORS; (M5885)NABA MATRISOME ASSOCIATED; (M5889)NABA MATRISOME		1.0	0.0	1.0	0.0	0.0	1.0	1.0	0.0	1.0	0.0	0.0	0.0	0.0	1.0	0.0	1.0	0.0	0.0	0.0	0.0
RP1-118J21.5						None	None	None	None	None	None	None	None	None	nan	nan	nan	nan	nan	nan	nan	nan	nan	nan	nan	nan	nan	nan	nan	nan	nan	nan	nan	nan
CYBB	1536	symbol	H. sapiens	1536	H. sapiens	CYBB	cytochrome b-245 beta chain	GO:1904845 cellular response to L-glutamine;GO:1904844 response to L-glutamine;GO:0097411 hypoxia-inducible factor-1alpha signaling pathway		Disease related genes; Transporters:Transport Electron Carriers; Human disease related genes:Immune system diseases:Primary immunodeficiency; Potential drug targets		Dextromethorphan	(M278)PID RAC1 PATHWAY	(M5932)HALLMARK INFLAMMATORY RESPONSE	0.0	0.0	1.0	0.0	0.0	0.0	0.0	1.0	0.0	0.0	1.0	0.0	0.0	0.0	0.0	0.0	0.0	0.0	0.0	0.0
LILRA2	11027	symbol	H. sapiens	11027	H. sapiens	LILRA2	leukocyte immunoglobulin like receptor A2	GO:0071657 positive regulation of granulocyte colony-stimulating factor production;GO:1901258 positive regulation of macrophage colony-stimulating factor production;GO:0071655 regulation of granulocyte colony-stimulating factor production		Predicted intracellular proteins; Predicted secreted proteins; CD markers					0.0	0.0	1.0	0.0	0.0	1.0	1.0	1.0	1.0	1.0	1.0	1.0	0.0	0.0	0.0	0.0	0.0	0.0	0.0	0.0
P2RY12	64805	symbol	H. sapiens	64805	H. sapiens	P2RY12	purinergic receptor P2Y12	GO:0021806 initiation of movement involved in cerebral cortex radial glia guided migration;GO:0021808 cytosolic calcium signaling involved in initiation of cell movement in glial-mediated radial cell migration;GO:0033626 positive regulation of integrin activation by cell surface receptor linked signal transduction		G-protein coupled receptors:Adenosine and adenine nucleotide receptors; Transporters; Disease related genes; G-protein coupled receptors:GPCRs excl olfactory receptors; Human disease related genes:Cardiovascular diseases:Hematologic diseases; FDA approved drug targets:Small molecule drugs		Ticlopidine; Treprostinil; Clopidogrel; Epoprostenol; Regrelor; Prasugrel; Elinogrel; Cangrelor; Ticagrelor			0.0	0.0	0.0	0.0	0.0	1.0	0.0	0.0	1.0	1.0	0.0	0.0	1.0	0.0	0.0	0.0	0.0	1.0	0.0	0.0
FAM129C	199786	gene_synonym	H. sapiens	199786	H. sapiens	NIBAN3	niban apoptosis regulator 3			Predicted intracellular proteins	Cytosol;Nucleoplasm (Approved)				0.0	0.0	0.0	0.0	0.0	0.0	0.0	0.0	0.0	0.0	0.0	0.0	0.0	0.0	0.0	0.0	0.0	0.0	0.0	0.0
NPHS1	4868	symbol	H. sapiens	4868	H. sapiens	NPHS1	NPHS1 adhesion molecule, nephrin	GO:0036058 filtration diaphragm assembly;GO:0036060 slit diaphragm assembly;GO:0072015 podocyte development		Disease related genes; Potential drug targets; Human disease related genes:Urinary system diseases:Kidney diseases; Predicted intracellular proteins; Transporters:Accessory Factors Involved in Transport			(M193)PID NEPHRIN NEPH1 PATHWAY	(M5956)HALLMARK KRAS SIGNALING DN	0.0	0.0	0.0	0.0	1.0	0.0	0.0	0.0	0.0	0.0	0.0	0.0	0.0	0.0	0.0	0.0	0.0	1.0	0.0	0.0
RP11-396F22.1						None	None	None	None	None	None	None	None	None	nan	nan	nan	nan	nan	nan	nan	nan	nan	nan	nan	nan	nan	nan	nan	nan	nan	nan	nan	nan
CTB-61M7.2						None	None	None	None	None	None	None	None	None	nan	nan	nan	nan	nan	nan	nan	nan	nan	nan	nan	nan	nan	nan	nan	nan	nan	nan	nan	nan
SLPI	6590	symbol	H. sapiens	6590	H. sapiens	SLPI	secretory leukocyte peptidase inhibitor	GO:0035821 modulation of process of another organism;GO:0019731 antibacterial humoral response;GO:0045071 negative regulation of viral genome replication		Predicted secreted proteins; Cancer-related genes:Candidate cancer biomarkers	Golgi apparatus (Approved)		(M3468)NABA ECM REGULATORS; (M5885)NABA MATRISOME ASSOCIATED; (M5889)NABA MATRISOME	(M5953)HALLMARK KRAS SIGNALING UP	1.0	0.0	0.0	1.0	0.0	0.0	0.0	0.0	0.0	0.0	0.0	0.0	0.0	0.0	1.0	0.0	0.0	0.0	0.0	0.0
FAM26F	441168	gene_synonym	H. sapiens	441168	H. sapiens	CALHM6	calcium homeostasis modulator family member 6	GO:0098655 cation transmembrane transport;GO:0006812 cation transport;GO:0034220 ion transmembrane transport		Predicted intracellular proteins; Transporters:Transporter channels and pores					0.0	0.0	0.0	0.0	0.0	0.0	0.0	0.0	0.0	0.0	0.0	0.0	0.0	0.0	0.0	0.0	0.0	0.0	0.0	0.0
GPR34	2857	symbol	H. sapiens	2857	H. sapiens	GPR34	G protein-coupled receptor 34	GO:0035589 G protein-coupled purinergic nucleotide receptor signaling pathway;GO:0035590 purinergic nucleotide receptor signaling pathway;GO:0007186 G protein-coupled receptor signaling pathway		G-protein coupled receptors:GPCRs excl olfactory receptors	Cytosol (Approved)				0.0	0.0	0.0	0.0	0.0	0.0	0.0	0.0	0.0	0.0	0.0	0.0	1.0	0.0	0.0	0.0	0.0	0.0	0.0	0.0
RP4-647J21.1						None	None	None	None	None	None	None	None	None	nan	nan	nan	nan	nan	nan	nan	nan	nan	nan	nan	nan	nan	nan	nan	nan	nan	nan	nan	nan
EVI2B	2124	symbol	H. sapiens	2124	H. sapiens	EVI2B	ecotropic viral integration site 2B	GO:0045660 positive regulation of neutrophil differentiation;GO:0045658 regulation of neutrophil differentiation;GO:0030854 positive regulation of granulocyte differentiation		CD markers	Plasma membrane (Approved)				0.0	0.0	0.0	0.0	0.0	1.0	0.0	0.0	1.0	0.0	0.0	0.0	0.0	0.0	0.0	0.0	0.0	0.0	0.0	0.0
IL18RAP	8807	symbol	H. sapiens	8807	H. sapiens	IL18RAP	interleukin 18 receptor accessory protein	GO:0035655 interleukin-18-mediated signaling pathway;GO:0071351 cellular response to interleukin-18;GO:0070673 response to interleukin-18		Predicted intracellular proteins; Enzymes; ENZYME proteins:Hydrolases; CD markers			(M290)PID IL12 STAT4 PATHWAY; (M196)PID IL23 PATHWAY; (M54)PID IL12 2PATHWAY	(M5932)HALLMARK INFLAMMATORY RESPONSE; (M5950)HALLMARK ALLOGRAFT REJECTION	0.0	0.0	1.0	0.0	0.0	0.0	0.0	0.0	0.0	0.0	0.0	0.0	0.0	0.0	0.0	0.0	0.0	0.0	0.0	0.0
RP11-733O18.1						None	None	None	None	None	None	None	None	None	nan	nan	nan	nan	nan	nan	nan	nan	nan	nan	nan	nan	nan	nan	nan	nan	nan	nan	nan	nan
GFPT2	9945	symbol	H. sapiens	9945	H. sapiens	GFPT2	glutamine-fructose-6-phosphate transaminase 2	GO:0006048 UDP-N-acetylglucosamine biosynthetic process;GO:0006002 fructose 6-phosphate metabolic process;GO:0046349 amino sugar biosynthetic process		ENZYME proteins:Transferases; Predicted intracellular proteins; Enzymes	Vesicles (Approved)			(M5890)HALLMARK TNFA SIGNALING VIA NFKB; (M5953)HALLMARK KRAS SIGNALING UP	0.0	0.0	1.0	0.0	0.0	0.0	0.0	0.0	0.0	0.0	0.0	0.0	0.0	0.0	0.0	0.0	0.0	0.0	0.0	0.0
IL17REL	400935	symbol	H. sapiens	400935	H. sapiens	IL17REL	interleukin 17 receptor E like	GO:0019221 cytokine-mediated signaling pathway;GO:0071345 cellular response to cytokine stimulus;GO:0034097 response to cytokine		Predicted intracellular proteins					0.0	0.0	1.0	0.0	0.0	0.0	0.0	0.0	0.0	0.0	0.0	0.0	0.0	0.0	0.0	0.0	0.0	0.0	0.0	0.0
SLC22A31	146429	symbol	H. sapiens	146429	H. sapiens	SLC22A31	solute carrier family 22 member 31	GO:0055085 transmembrane transport;GO:0006811 ion transport;GO:0006810 transport		Transporters:Electrochemical Potential-driven transporters					0.0	0.0	0.0	0.0	0.0	0.0	0.0	0.0	0.0	0.0	0.0	0.0	0.0	0.0	0.0	0.0	0.0	0.0	0.0	0.0
FCGR1B	2210	gene_synonym	H. sapiens	2210	H. sapiens	FCGR1BP	Fc gamma receptor Ib, pseudogene	GO:0038093 Fc receptor signaling pathway;GO:0002768 immune response-regulating cell surface receptor signaling pathway;GO:0002764 immune response-regulating signaling pathway		Predicted intracellular proteins; FDA approved drug targets:Biotech drugs	Vesicles (Uncertain); Additional: Golgi apparatus;Plasma membrane				0.0	1.0	0.0	0.0	0.0	0.0	1.0	0.0	0.0	0.0	0.0	0.0	0.0	0.0	0.0	0.0	0.0	0.0	0.0	0.0
RP11-311F12.1						None	None	None	None	None	None	None	None	None	nan	nan	nan	nan	nan	nan	nan	nan	nan	nan	nan	nan	nan	nan	nan	nan	nan	nan	nan	nan
RNASE2	6036	symbol	H. sapiens	6036	H. sapiens	RNASE2	ribonuclease A family member 2	GO:0002227 innate immune response in mucosa;GO:0002385 mucosal immune response;GO:0002251 organ or tissue specific immune response		Predicted secreted proteins; ENZYME proteins:Lyases; Enzymes		Adenosine 3',5'-diphosphate; Adenosine-2'-5'-Diphosphate			0.0	0.0	1.0	0.0	0.0	0.0	0.0	0.0	0.0	0.0	0.0	0.0	0.0	0.0	0.0	0.0	0.0	0.0	0.0	0.0
TMEM150B	284417	symbol	H. sapiens	284417	H. sapiens	TMEM150B	transmembrane protein 150B	GO:0006914 autophagy;GO:0061919 process utilizing autophagic mechanism;GO:0044248 cellular catabolic process		Transporters:Accessory Factors Involved in Transport					0.0	0.0	0.0	0.0	0.0	0.0	0.0	0.0	0.0	0.0	0.0	0.0	0.0	0.0	0.0	0.0	0.0	0.0	0.0	0.0
MYBPC2	4606	symbol	H. sapiens	4606	H. sapiens	MYBPC2	myosin binding protein C2	GO:0006936 muscle contraction;GO:0003012 muscle system process;GO:0007155 cell adhesion		Predicted intracellular proteins					0.0	0.0	0.0	0.0	0.0	0.0	0.0	0.0	0.0	0.0	0.0	0.0	0.0	0.0	0.0	0.0	0.0	0.0	0.0	0.0
RBP1	5947	symbol	H. sapiens	5947	H. sapiens	RBP1	retinol binding protein 1	GO:0002138 retinoic acid biosynthetic process;GO:0006776 vitamin A metabolic process;GO:0016102 diterpenoid biosynthetic process		Predicted intracellular proteins	Cytosol (Approved); Additional: Nucleoplasm	Acitretin	(M207)PID RETINOIC ACID PATHWAY	(M5948)HALLMARK BILE ACID METABOLISM	0.0	0.0	0.0	0.0	0.0	0.0	0.0	0.0	0.0	0.0	0.0	0.0	0.0	0.0	0.0	0.0	0.0	0.0	0.0	0.0
KCNJ12	3768	symbol	H. sapiens	3768	H. sapiens	KCNJ12	potassium inwardly rectifying channel subfamily J member 12	GO:1990573 potassium ion import across plasma membrane;GO:0051289 protein homotetramerization;GO:0051262 protein tetramerization		Voltage-gated ion channels:Inwardly Rectifying Potassium Channels; Transporters:Transporter channels and pores; FDA approved drug targets:Small molecule drugs	Golgi apparatus (Uncertain); Additional: Cytosol;Nucleoplasm	Dofetilide; Ranolazine; Miconazole; Dronedarone			0.0	0.0	0.0	0.0	0.0	0.0	0.0	0.0	0.0	0.0	0.0	0.0	0.0	0.0	0.0	0.0	0.0	0.0	0.0	0.0
RHCG	51458	symbol	H. sapiens	51458	H. sapiens	RHCG	Rh family C glycoprotein	GO:0070634 transepithelial ammonium transport;GO:0097272 ammonium homeostasis;GO:0015837 amine transport		Transporters:Transporter channels and pores				(M5916)HALLMARK APICAL SURFACE	0.0	0.0	0.0	0.0	1.0	0.0	0.0	0.0	0.0	0.0	0.0	0.0	0.0	0.0	0.0	0.0	0.0	0.0	0.0	0.0
C3AR1	719	symbol	H. sapiens	719	H. sapiens	C3AR1	complement C3a receptor 1	GO:0002430 complement receptor mediated signaling pathway;GO:0010759 positive regulation of macrophage chemotaxis;GO:0090023 positive regulation of neutrophil chemotaxis		G-protein coupled receptors:Chemokines and chemotactic factors receptors; G-protein coupled receptors:GPCRs excl olfactory receptors				(M5932)HALLMARK INFLAMMATORY RESPONSE; (M5953)HALLMARK KRAS SIGNALING UP	0.0	0.0	1.0	0.0	0.0	0.0	1.0	0.0	0.0	1.0	1.0	0.0	1.0	0.0	0.0	0.0	0.0	0.0	1.0	0.0
CCSER1	401145	symbol	H. sapiens	401145	H. sapiens	CCSER1	coiled-coil serine rich protein 1			Predicted intracellular proteins					0.0	0.0	0.0	0.0	0.0	0.0	0.0	0.0	0.0	0.0	0.0	0.0	0.0	0.0	0.0	0.0	0.0	0.0	0.0	0.0
SLC45A2	51151	symbol	H. sapiens	51151	H. sapiens	SLC45A2	solute carrier family 45 member 2	GO:0015766 disaccharide transport;GO:0015770 sucrose transport;GO:0015772 oligosaccharide transport		Disease related genes; Transporters:Electrochemical Potential-driven transporters; Potential drug targets; Human disease related genes:Congenital disorders of metabolism:Congenital disorders of amino acid metabolism					0.0	0.0	0.0	0.0	0.0	0.0	0.0	0.0	0.0	0.0	0.0	0.0	0.0	0.0	0.0	0.0	0.0	0.0	0.0	0.0
FAIM3	9214	gene_synonym	H. sapiens	9214	H. sapiens	FCMR	Fc mu receptor	GO:0006968 cellular defense response;GO:0043066 negative regulation of apoptotic process;GO:0043069 negative regulation of programmed cell death		Predicted intracellular proteins; Predicted secreted proteins	Cytosol;Focal adhesion sites (Approved); Additional: Nucleoplasm			(M5906)HALLMARK ESTROGEN RESPONSE EARLY	0.0	0.0	0.0	0.0	0.0	0.0	0.0	0.0	0.0	0.0	0.0	0.0	0.0	0.0	0.0	0.0	0.0	0.0	0.0	0.0
FAT2	2196	symbol	H. sapiens	2196	H. sapiens	FAT2	FAT atypical cadherin 2	GO:0010631 epithelial cell migration;GO:0090132 epithelium migration;GO:0090130 tissue migration		Disease related genes; Human disease related genes:Nervous system diseases:Neurodegenerative diseases					0.0	0.0	0.0	0.0	0.0	0.0	0.0	0.0	0.0	0.0	0.0	0.0	0.0	0.0	0.0	0.0	0.0	1.0	0.0	0.0
CD109	135228	symbol	H. sapiens	135228	H. sapiens	CD109	CD109 molecule	GO:0072675 osteoclast fusion;GO:0072674 multinuclear osteoclast differentiation;GO:0010839 negative regulation of keratinocyte proliferation		CD markers	Plasma membrane (Supported); Additional: Cytosol		(M3468)NABA ECM REGULATORS; (M5885)NABA MATRISOME ASSOCIATED; (M5889)NABA MATRISOME		1.0	0.0	0.0	0.0	1.0	1.0	0.0	0.0	1.0	0.0	0.0	1.0	0.0	0.0	0.0	0.0	0.0	0.0	0.0	0.0
RP11-89K11.1						None	None	None	None	None	None	None	None	None	nan	nan	nan	nan	nan	nan	nan	nan	nan	nan	nan	nan	nan	nan	nan	nan	nan	nan	nan	nan
RP6-91H8.3						None	None	None	None	None	None	None	None	None	nan	nan	nan	nan	nan	nan	nan	nan	nan	nan	nan	nan	nan	nan	nan	nan	nan	nan	nan	nan
CTB-113P19.4						None	None	None	None	None	None	None	None	None	nan	nan	nan	nan	nan	nan	nan	nan	nan	nan	nan	nan	nan	nan	nan	nan	nan	nan	nan	nan
C11orf21	29125	symbol	H. sapiens	29125	H. sapiens	C11orf21	chromosome 11 open reading frame 21			Predicted intracellular proteins	Nucleoplasm (Approved); Additional: Cytosol				0.0	0.0	0.0	0.0	0.0	0.0	0.0	0.0	0.0	0.0	0.0	0.0	0.0	0.0	0.0	0.0	0.0	0.0	0.0	0.0
MUC4	4585	symbol	H. sapiens	4585	H. sapiens	MUC4	mucin 4, cell surface associated	GO:0030277 maintenance of gastrointestinal epithelium;GO:0010669 epithelial structure maintenance;GO:0022600 digestive system process		Predicted secreted proteins			(M5880)NABA ECM AFFILIATED; (M5885)NABA MATRISOME ASSOCIATED; (M5889)NABA MATRISOME		1.0	0.0	0.0	0.0	0.0	0.0	0.0	0.0	0.0	0.0	0.0	0.0	0.0	0.0	0.0	0.0	0.0	0.0	0.0	1.0
CXCL5	6374	symbol	H. sapiens	6374	H. sapiens	CXCL5	C-X-C motif chemokine ligand 5	GO:0061844 antimicrobial humoral immune response mediated by antimicrobial peptide;GO:0030593 neutrophil chemotaxis;GO:0070098 chemokine-mediated signaling pathway		Predicted secreted proteins; Cancer-related genes:Candidate cancer biomarkers	Vesicles (Approved)		(M5883)NABA SECRETED FACTORS; (M5885)NABA MATRISOME ASSOCIATED; (M5889)NABA MATRISOME		1.0	0.0	1.0	1.0	0.0	0.0	0.0	0.0	0.0	0.0	0.0	0.0	1.0	0.0	1.0	0.0	0.0	0.0	0.0	0.0
RP11-325F22.2						None	None	None	None	None	None	None	None	None	nan	nan	nan	nan	nan	nan	nan	nan	nan	nan	nan	nan	nan	nan	nan	nan	nan	nan	nan	nan
ATP6V0A4	50617	symbol	H. sapiens	50617	H. sapiens	ATP6V0A4	ATPase H+ transporting V0 subunit a4	GO:0097254 renal tubular secretion;GO:0007588 excretion;GO:0007035 vacuolar acidification		Disease related genes; Transporters:Primary Active Transporters; Potential drug targets; Human disease related genes:Urinary system diseases:Kidney diseases; Predicted intracellular proteins	Cytosol (Uncertain)			(M5916)HALLMARK APICAL SURFACE	0.0	0.0	0.0	0.0	0.0	0.0	0.0	0.0	0.0	0.0	0.0	0.0	0.0	0.0	0.0	0.0	0.0	0.0	0.0	0.0
MIXL1	83881	symbol	H. sapiens	83881	H. sapiens	MIXL1	Mix paired-like homeobox	GO:2000382 positive regulation of mesoderm development;GO:2000380 regulation of mesoderm development;GO:1901533 negative regulation of hematopoietic progenitor cell differentiation		Transcription factors:Helix-turn-helix domains; Predicted intracellular proteins	Nucleoplasm (Approved)				0.0	0.0	0.0	0.0	0.0	1.0	0.0	0.0	0.0	0.0	0.0	0.0	0.0	0.0	0.0	0.0	0.0	0.0	0.0	0.0
MT2A	4502	symbol	H. sapiens	4502	H. sapiens	MT2A	metallothionein 2A	GO:0036018 cellular response to erythropoietin;GO:0036015 response to interleukin-3;GO:0036016 cellular response to interleukin-3		Predicted intracellular proteins		Zinc; Zinc acetate; Zinc chloride; Zinc sulfate, unspecified form	(M167)PID AP1 PATHWAY	(M5891)HALLMARK HYPOXIA; (M5901)HALLMARK G2M CHECKPOINT; (M5913)HALLMARK INTERFERON GAMMA RESPONSE	0.0	0.0	1.0	0.0	0.0	0.0	0.0	0.0	0.0	0.0	0.0	0.0	0.0	0.0	0.0	0.0	0.0	0.0	0.0	0.0
PRSS3P2	154754	symbol	H. sapiens	154754	H. sapiens	PRSS3P2	PRSS3 pseudogene 2	GO:0043542 endothelial cell migration;GO:0010631 epithelial cell migration;GO:0090132 epithelium migration							0.0	0.0	0.0	0.0	0.0	0.0	0.0	0.0	0.0	0.0	0.0	0.0	0.0	0.0	0.0	0.0	0.0	0.0	0.0	0.0
DPYD	1806	symbol	H. sapiens	1806	H. sapiens	DPYD	dihydropyrimidine dehydrogenase	GO:0006214 thymidine catabolic process;GO:0046127 pyrimidine deoxyribonucleoside catabolic process;GO:0006212 uracil catabolic process		Predicted intracellular proteins; Disease related genes; ENZYME proteins:Oxidoreductases; Human disease related genes:Congenital disorders of metabolism:Congenital disorders of nucleotide metabolism; Enzymes; FDA approved drug targets:Small molecule drugs		(5S)-5-Iododihydro-2,4(1H,3H)-pyrimidinedione; NADPH; 6-Carboxymethyluracil; Flavin adenine dinucleotide; Flavin mononucleotide; Uracil; Eniluracil; 5-Iodouracil; Gimeracil; Tegafur-uracil		(M5902)HALLMARK APOPTOSIS	0.0	0.0	0.0	0.0	0.0	0.0	0.0	0.0	0.0	0.0	0.0	0.0	0.0	0.0	0.0	0.0	0.0	0.0	0.0	0.0
SRGN	5552	symbol	H. sapiens	5552	H. sapiens	SRGN	serglycin	GO:0033371 T cell secretory granule organization;GO:0033367 protein localization to mast cell secretory granule;GO:0033368 protease localization to mast cell secretory granule		Predicted secreted proteins	Golgi apparatus (Supported)		(M5882)NABA PROTEOGLYCANS; (M5884)NABA CORE MATRISOME; (M5889)NABA MATRISOME	(M5950)HALLMARK ALLOGRAFT REJECTION	0.0	0.0	0.0	0.0	0.0	0.0	0.0	0.0	0.0	0.0	0.0	0.0	0.0	0.0	0.0	0.0	0.0	0.0	0.0	0.0
LINC00460	728192	symbol	H. sapiens	728192	H. sapiens	LINC00460	long intergenic non-protein coding RNA 460								0.0	0.0	0.0	0.0	0.0	0.0	0.0	0.0	0.0	0.0	0.0	0.0	0.0	0.0	0.0	0.0	0.0	0.0	0.0	0.0
PVALB	5816	symbol	H. sapiens	5816	H. sapiens	PVALB	parvalbumin	GO:0098977 inhibitory chemical synaptic transmission;GO:0098976 excitatory chemical synaptic transmission;GO:0090102 cochlea development		Predicted intracellular proteins	Nucleoplasm (Approved); Additional: Cell Junctions;Nucleoli	Formic acid		(M5909)HALLMARK MYOGENESIS	0.0	0.0	0.0	0.0	0.0	0.0	0.0	0.0	0.0	0.0	0.0	0.0	0.0	0.0	0.0	0.0	0.0	0.0	0.0	0.0
RP11-483L5.1						None	None	None	None	None	None	None	None	None	nan	nan	nan	nan	nan	nan	nan	nan	nan	nan	nan	nan	nan	nan	nan	nan	nan	nan	nan	nan
FPR1	2357	symbol	H. sapiens	2357	H. sapiens	FPR1	formyl peptide receptor 1	GO:0002430 complement receptor mediated signaling pathway;GO:0007263 nitric oxide mediated signal transduction;GO:0007200 phospholipase C-activating G protein-coupled receptor signaling pathway		G-protein coupled receptors:Chemokines and chemotactic factors receptors; G-protein coupled receptors:GPCRs excl olfactory receptors	Golgi apparatus (Approved); Additional: Nucleoli;Nucleoplasm	Nedocromil	(M174)PID UPA UPAR PATHWAY	(M5913)HALLMARK INTERFERON GAMMA RESPONSE; (M5932)HALLMARK INFLAMMATORY RESPONSE	0.0	0.0	1.0	0.0	0.0	0.0	1.0	0.0	0.0	0.0	0.0	0.0	1.0	0.0	0.0	0.0	0.0	0.0	0.0	0.0
RP11-84D1.1						None	None	None	None	None	None	None	None	None	nan	nan	nan	nan	nan	nan	nan	nan	nan	nan	nan	nan	nan	nan	nan	nan	nan	nan	nan	nan
PLA2G4E	123745	symbol	H. sapiens	123745	H. sapiens	PLA2G4E	phospholipase A2 group IVE	GO:0036149 phosphatidylinositol acyl-chain remodeling;GO:2001137 positive regulation of endocytic recycling;GO:0070292 N-acylphosphatidylethanolamine metabolic process		RAS pathway related proteins; Predicted intracellular proteins; Enzymes; ENZYME proteins:Hydrolases	Cytosol;Vesicles (Approved)				0.0	0.0	0.0	0.0	0.0	0.0	0.0	0.0	0.0	0.0	0.0	0.0	0.0	0.0	0.0	0.0	0.0	0.0	0.0	0.0
C1QB	713	symbol	H. sapiens	713	H. sapiens	C1QB	complement C1q B chain	GO:0098883 synapse pruning;GO:0150146 cell junction disassembly;GO:0006958 complement activation, classical pathway		Human disease related genes:Immune system diseases:Primary immunodeficiency; Predicted secreted proteins		Cetuximab; Palivizumab; Daclizumab; Bevacizumab; Zinc; Zinc acetate; Zinc chloride; Zinc sulfate, unspecified form	(M5880)NABA ECM AFFILIATED; (M5885)NABA MATRISOME ASSOCIATED; (M5889)NABA MATRISOME		1.0	1.0	0.0	0.0	0.0	1.0	1.0	0.0	0.0	0.0	0.0	0.0	0.0	0.0	1.0	0.0	0.0	0.0	1.0	1.0
CD27	939	symbol	H. sapiens	939	H. sapiens	CD27	CD27 molecule	GO:0045579 positive regulation of B cell differentiation;GO:0070233 negative regulation of T cell apoptotic process;GO:0045577 regulation of B cell differentiation		Disease related genes; Cancer-related genes:Candidate cancer biomarkers; CD markers					0.0	1.0	1.0	0.0	0.0	1.0	0.0	0.0	1.0	0.0	0.0	0.0	0.0	0.0	0.0	0.0	0.0	0.0	1.0	0.0
SLC38A4	55089	symbol	H. sapiens	55089	H. sapiens	SLC38A4	solute carrier family 38 member 4	GO:0003333 amino acid transmembrane transport;GO:0006865 amino acid transport;GO:1905039 carboxylic acid transmembrane transport		FDA approved drug targets:Small molecule drugs; Transporters:Electrochemical Potential-driven transporters					0.0	0.0	0.0	0.0	0.0	0.0	0.0	0.0	0.0	0.0	0.0	0.0	0.0	0.0	0.0	0.0	0.0	0.0	0.0	0.0
GABRP	2568	symbol	H. sapiens	2568	H. sapiens	GABRP	gamma-aminobutyric acid type A receptor subunit pi	GO:1902476 chloride transmembrane transport;GO:0098661 inorganic anion transmembrane transport;GO:0006821 chloride transport		Predicted intracellular proteins; FDA approved drug targets:Small molecule drugs		Ethanol; Fludiazepam			0.0	0.0	0.0	0.0	0.0	0.0	0.0	0.0	0.0	0.0	0.0	0.0	1.0	0.0	0.0	0.0	0.0	0.0	0.0	0.0
S100A8	6279	symbol	H. sapiens	6279	H. sapiens	S100A8	S100 calcium binding protein A8	GO:0070488 neutrophil aggregation;GO:0032119 sequestering of zinc ion;GO:0017014 protein nitrosylation		Predicted intracellular proteins; Predicted secreted proteins; Cancer-related genes:Candidate cancer biomarkers	Intermediate filaments (Supported); Additional: Cytosol	Calcium; Zinc; Copper; Zinc acetate; Zinc chloride; Zinc sulfate, unspecified form	(M264)PID TOLL ENDOGENOUS PATHWAY; (M5883)NABA SECRETED FACTORS; (M5885)NABA MATRISOME ASSOCIATED		1.0	0.0	1.0	1.0	0.0	0.0	0.0	1.0	0.0	1.0	0.0	1.0	0.0	0.0	0.0	0.0	0.0	1.0	0.0	0.0
SOX30	11063	symbol	H. sapiens	11063	H. sapiens	SOX30	SRY-box transcription factor 30	GO:0120211 proacrosomal vesicle fusion;GO:0001675 acrosome assembly;GO:0033363 secretory granule organization		Transcription factors:Other all-alpha-helical DNA-binding domains; Predicted intracellular proteins	Nucleoplasm;Vesicles (Supported); Additional: Cytosol				0.0	0.0	0.0	0.0	0.0	0.0	0.0	0.0	0.0	0.0	0.0	0.0	0.0	0.0	0.0	0.0	0.0	0.0	0.0	0.0
IRF4	3662	symbol	H. sapiens	3662	H. sapiens	IRF4	interferon regulatory factor 4	GO:0072540 T-helper 17 cell lineage commitment;GO:0072539 T-helper 17 cell differentiation;GO:0002295 T-helper cell lineage commitment		Cancer-related genes:Mutated cancer genes; Disease related genes; Transcription factors:Helix-turn-helix domains; Predicted intracellular proteins; Cancer-related genes:Candidate cancer biomarkers	Nucleoplasm (Supported); Additional: Cytosol		(M60)PID NFAT TFPATHWAY; (M28)PID IL4 2PATHWAY	(M5947)HALLMARK IL2 STAT5 SIGNALING; (M5913)HALLMARK INTERFERON GAMMA RESPONSE; (M5950)HALLMARK ALLOGRAFT REJECTION	0.0	1.0	1.0	0.0	0.0	1.0	0.0	0.0	1.0	0.0	1.0	0.0	0.0	1.0	0.0	1.0	0.0	0.0	1.0	0.0
PTPRC	5788	symbol	H. sapiens	5788	H. sapiens	PTPRC	protein tyrosine phosphatase receptor type C	GO:0044855 plasma membrane raft distribution;GO:0044856 plasma membrane raft localization;GO:1904155 DN2 thymocyte differentiation		Predicted intracellular proteins; ENZYME proteins:Hydrolases; Cancer-related genes; CD markers; Disease related genes; Potential drug targets; Human disease related genes:Immune system diseases:Primary immunodeficiency; Enzymes; Transporters:Accessory Factors Involved in Transport	Nucleoplasm;Vesicles (Uncertain)		(M1315)SIG PIP3 SIGNALING IN B LYMPHOCYTES; (M8626)SIG BCR SIGNALING PATHWAY; (M88)PID CD8 TCR PATHWAY	(M5915)HALLMARK APICAL JUNCTION; (M5950)HALLMARK ALLOGRAFT REJECTION	0.0	0.0	0.0	0.0	0.0	1.0	1.0	1.0	1.0	1.0	1.0	1.0	0.0	1.0	0.0	1.0	0.0	1.0	0.0	0.0
LRRTM2	26045	symbol	H. sapiens	26045	H. sapiens	LRRTM2	leucine rich repeat transmembrane neuronal 2	GO:0099151 regulation of postsynaptic density assembly;GO:0099150 regulation of postsynaptic specialization assembly;GO:1904889 regulation of excitatory synapse assembly		Predicted intracellular proteins					0.0	0.0	0.0	0.0	0.0	0.0	0.0	0.0	0.0	0.0	0.0	0.0	0.0	0.0	0.0	0.0	0.0	0.0	0.0	0.0
BCHE	590	symbol	H. sapiens	590	H. sapiens	BCHE	butyrylcholinesterase	GO:0046448 tropane alkaloid metabolic process;GO:0050783 cocaine metabolic process;GO:0006581 acetylcholine catabolic process		Predicted intracellular proteins; ENZYME proteins:Hydrolases; Predicted secreted proteins; Disease related genes; Human disease related genes:Congenital disorders of metabolism:Congenital disorders of lipid/glycolipid metabolism; Enzymes; FDA approved drug targets:Small molecule drugs		Choline; Tacrine; Dipivefrin; Pyridostigmine; Galantamine; Isoflurophate; Pralidoxime; Malathion; Donepezil; Hexafluronium; Demecarium; Rivastigmine; Edrophonium; Echothiophate; Ketamine; Mivacurium; Diethyl phosphonate; Methylphosphinic Acid; Butyric Acid; 9-N-Phenylmethylamino-Tacrine; 2-(N-morpholino)ethanesulfonic acid; Ethyl dihydrogen phosphate; Butyrylthiocholine; Phenserine; DODECANESULFO…			0.0	0.0	0.0	0.0	0.0	0.0	0.0	0.0	1.0	0.0	0.0	0.0	0.0	0.0	0.0	0.0	0.0	0.0	0.0	0.0
ABCC2	1244	symbol	H. sapiens	1244	H. sapiens	ABCC2	ATP binding cassette subfamily C member 2	GO:0015723 bilirubin transport;GO:1990962 xenobiotic transport across blood-brain barrier;GO:0006855 xenobiotic transmembrane transport		Human disease related genes:Congenital disorders of metabolism:Congenital disorders of cofactor/vitamin metabolism; Disease related genes; ENZYME proteins; Cancer-related genes:Candidate cancer biomarkers; Transporters:Primary Active Transporters; Enzymes; FDA approved drug targets:Small molecule drugs		ATP; Sulfinpyrazone		(M5934)HALLMARK XENOBIOTIC METABOLISM	0.0	0.0	0.0	0.0	0.0	0.0	0.0	0.0	0.0	0.0	0.0	0.0	0.0	0.0	0.0	0.0	0.0	0.0	0.0	0.0
RP11-69G7.1						None	None	None	None	None	None	None	None	None	nan	nan	nan	nan	nan	nan	nan	nan	nan	nan	nan	nan	nan	nan	nan	nan	nan	nan	nan	nan
ASB2	51676	symbol	H. sapiens	51676	H. sapiens	ASB2	ankyrin repeat and SOCS box containing 2	GO:0071800 podosome assembly;GO:0036336 dendritic cell migration;GO:0035914 skeletal muscle cell differentiation		Predicted intracellular proteins	Nucleoli fibrillar center (Approved); Additional: Cytosol;Nucleoplasm				0.0	0.0	1.0	0.0	0.0	0.0	0.0	1.0	0.0	0.0	0.0	0.0	0.0	0.0	0.0	0.0	0.0	0.0	0.0	0.0
NECAB2	54550	symbol	H. sapiens	54550	H. sapiens	NECAB2	N-terminal EF-hand calcium binding protein 2	GO:1904021 negative regulation of G protein-coupled receptor internalization;GO:1900451 positive regulation of glutamate receptor signaling pathway;GO:0060168 positive regulation of adenosine receptor signaling pathway		Predicted intracellular proteins					0.0	0.0	0.0	0.0	0.0	0.0	0.0	0.0	0.0	0.0	0.0	0.0	0.0	0.0	0.0	0.0	0.0	0.0	0.0	0.0
CD52	1043	symbol	H. sapiens	1043	H. sapiens	CD52	CD52 molecule	GO:0045730 respiratory burst;GO:0007204 positive regulation of cytosolic calcium ion concentration;GO:0065008 regulation of biological quality		FDA approved drug targets:Biotech drugs; Cancer-related genes:Candidate cancer biomarkers; CD markers		Alemtuzumab			0.0	0.0	0.0	0.0	0.0	0.0	0.0	0.0	0.0	0.0	0.0	0.0	1.0	0.0	0.0	0.0	0.0	0.0	0.0	0.0
KHDC1L	100129128	symbol	H. sapiens	100129128	H. sapiens	KHDC1L	KH domain containing 1 like	GO:0006919 activation of cysteine-type endopeptidase activity involved in apoptotic process;GO:0043280 positive regulation of cysteine-type endopeptidase activity involved in apoptotic process;GO:2001056 positive regulation of cysteine-type endopeptidase activity		Predicted intracellular proteins					0.0	0.0	0.0	0.0	0.0	0.0	0.0	0.0	0.0	0.0	0.0	0.0	0.0	0.0	0.0	0.0	0.0	0.0	0.0	0.0
LLNLF-158E9.1						None	None	None	None	None	None	None	None	None	nan	nan	nan	nan	nan	nan	nan	nan	nan	nan	nan	nan	nan	nan	nan	nan	nan	nan	nan	nan
UBE2CP2	646595	symbol	H. sapiens	646595	H. sapiens	UBE2CP2	ubiquitin conjugating enzyme E2 C pseudogene 2								0.0	0.0	0.0	0.0	0.0	0.0	0.0	0.0	0.0	0.0	0.0	0.0	0.0	0.0	0.0	0.0	0.0	0.0	0.0	0.0
AHNAK2	113146	symbol	H. sapiens	113146	H. sapiens	AHNAK2	AHNAK nucleoprotein 2	GO:0043484 regulation of RNA splicing;GO:0051252 regulation of RNA metabolic process;GO:0019219 regulation of nucleobase-containing compound metabolic process		Cancer-related genes:Mutational cancer driver genes; Predicted intracellular proteins	Cytosol (Enhanced); Additional: Plasma membrane				0.0	0.0	0.0	0.0	0.0	0.0	0.0	0.0	0.0	0.0	0.0	0.0	0.0	0.0	0.0	0.0	0.0	0.0	0.0	0.0
CALN1	83698	symbol	H. sapiens	83698	H. sapiens	CALN1	calneuron 1			Predicted intracellular proteins	Vesicles (Uncertain); Additional: Plasma membrane				0.0	0.0	0.0	0.0	0.0	0.0	0.0	0.0	0.0	0.0	0.0	0.0	0.0	0.0	0.0	0.0	0.0	0.0	0.0	0.0
RP4-694A7.2						None	None	None	None	None	None	None	None	None	nan	nan	nan	nan	nan	nan	nan	nan	nan	nan	nan	nan	nan	nan	nan	nan	nan	nan	nan	nan
GRM6	2916	symbol	H. sapiens	2916	H. sapiens	GRM6	glutamate metabotropic receptor 6	GO:0007196 adenylate cyclase-inhibiting G protein-coupled glutamate receptor signaling pathway;GO:0007216 G protein-coupled glutamate receptor signaling pathway;GO:0090280 positive regulation of calcium ion import		G-protein coupled receptors:Family 3 (C) receptors; Human disease related genes:Nervous system diseases:Eye disease; Disease related genes; G-protein coupled receptors:GPCRs excl olfactory receptors; Potential drug targets					0.0	0.0	0.0	0.0	0.0	0.0	0.0	0.0	0.0	0.0	0.0	0.0	1.0	0.0	0.0	0.0	0.0	0.0	0.0	0.0
WDR86-AS1	100131176	symbol	H. sapiens	100131176	H. sapiens	WDR86-AS1	WDR86 antisense RNA 1								0.0	0.0	0.0	0.0	0.0	0.0	0.0	0.0	0.0	0.0	0.0	0.0	0.0	0.0	0.0	0.0	0.0	0.0	0.0	0.0
RP5-1185I7.1						None	None	None	None	None	None	None	None	None	nan	nan	nan	nan	nan	nan	nan	nan	nan	nan	nan	nan	nan	nan	nan	nan	nan	nan	nan	nan
RP5-858L17.1						None	None	None	None	None	None	None	None	None	nan	nan	nan	nan	nan	nan	nan	nan	nan	nan	nan	nan	nan	nan	nan	nan	nan	nan	nan	nan
EBI3	10148	symbol	H. sapiens	10148	H. sapiens	EBI3	Epstein-Barr virus induced 3	GO:0033210 leptin-mediated signaling pathway;GO:0044320 cellular response to leptin stimulus;GO:0042088 T-helper 1 type immune response		Predicted secreted proteins			(M36)PID IL27 PATHWAY; (M5883)NABA SECRETED FACTORS; (M5885)NABA MATRISOME ASSOCIATED	(M5897)HALLMARK IL6 JAK STAT3 SIGNALING; (M5932)HALLMARK INFLAMMATORY RESPONSE	1.0	1.0	1.0	0.0	0.0	1.0	0.0	0.0	1.0	0.0	1.0	0.0	0.0	0.0	1.0	1.0	0.0	0.0	1.0	0.0
FCGR1A	2209	symbol	H. sapiens	2209	H. sapiens	FCGR1A	Fc gamma receptor Ia	GO:0001788 antibody-dependent cellular cytotoxicity;GO:0001794 type IIa hypersensitivity;GO:0002445 type II hypersensitivity		FDA approved drug targets:Biotech drugs; CD markers	Vesicles (Uncertain); Additional: Golgi apparatus;Plasma membrane	Cetuximab; Etanercept; Human immunoglobulin G; Gemtuzumab ozogamicin; Alemtuzumab; Natalizumab; Palivizumab; Daclizumab; Bevacizumab; Porfimer sodium; Catumaxomab; Sarilumab; Trastuzumab deruxtecan		(M5913)HALLMARK INTERFERON GAMMA RESPONSE	0.0	1.0	1.0	0.0	0.0	1.0	1.0	1.0	0.0	0.0	0.0	0.0	0.0	0.0	0.0	0.0	1.0	0.0	1.0	0.0
RASGRP2	10235	symbol	H. sapiens	10235	H. sapiens	RASGRP2	RAS guanyl releasing protein 2	GO:0071277 cellular response to calcium ion;GO:0051592 response to calcium ion;GO:0007265 Ras protein signal transduction		Disease related genes; RAS pathway related proteins; Predicted intracellular proteins; Human disease related genes:Cardiovascular diseases:Hematologic diseases	Plasma membrane (Supported)		(M269)PID RAS PATHWAY; (M88)PID CD8 TCR PATHWAY; (M34)PID TCR PATHWAY		0.0	0.0	1.0	0.0	0.0	0.0	0.0	1.0	0.0	0.0	0.0	0.0	1.0	0.0	0.0	0.0	0.0	0.0	0.0	0.0
RP11-135A1.3						None	None	None	None	None	None	None	None	None	nan	nan	nan	nan	nan	nan	nan	nan	nan	nan	nan	nan	nan	nan	nan	nan	nan	nan	nan	nan
CCNA1	8900	symbol	H. sapiens	8900	H. sapiens	CCNA1	cyclin A1	GO:0007141 male meiosis I;GO:0007140 male meiotic nuclear division;GO:0000079 regulation of cyclin-dependent protein serine/threonine kinase activity		Predicted intracellular proteins; Cancer-related genes:Candidate cancer biomarkers	Nuclear bodies;Nucleoplasm (Approved)		(M3686)SA REG CASCADE OF CYCLIN EXPR; (M195)PID CMYB PATHWAY	(M5951)HALLMARK SPERMATOGENESIS; (M5902)HALLMARK APOPTOSIS; (M5907)HALLMARK ESTROGEN RESPONSE LATE	0.0	0.0	0.0	0.0	0.0	0.0	0.0	0.0	0.0	0.0	0.0	0.0	0.0	0.0	0.0	0.0	0.0	0.0	0.0	0.0
CTD-2263F21.1						None	None	None	None	None	None	None	None	None	nan	nan	nan	nan	nan	nan	nan	nan	nan	nan	nan	nan	nan	nan	nan	nan	nan	nan	nan	nan
GPR123	84435	gene_synonym	H. sapiens	84435	H. sapiens	ADGRA1	adhesion G protein-coupled receptor A1	GO:0007186 G protein-coupled receptor signaling pathway;GO:0007166 cell surface receptor signaling pathway;GO:0007165 signal transduction		G-protein coupled receptors:GPCRs excl olfactory receptors; G-protein coupled receptors:Family 2 (B) receptors					0.0	0.0	0.0	0.0	0.0	0.0	0.0	0.0	0.0	0.0	0.0	0.0	0.0	0.0	0.0	0.0	0.0	0.0	0.0	0.0
LTA	4049	symbol	H. sapiens	4049	H. sapiens	LTA	lymphotoxin alpha	GO:0002876 positive regulation of chronic inflammatory response to antigenic stimulus;GO:0002874 regulation of chronic inflammatory response to antigenic stimulus;GO:0002678 positive regulation of chronic inflammatory response		Disease related genes; Predicted secreted proteins; Cancer-related genes:Candidate cancer biomarkers; FDA approved drug targets:Biotech drugs		Etanercept	(M234)PID IL2 STAT5 PATHWAY; (M28)PID IL4 2PATHWAY; (M5883)NABA SECRETED FACTORS	(M5932)HALLMARK INFLAMMATORY RESPONSE	1.0	0.0	1.0	1.0	0.0	1.0	1.0	0.0	1.0	1.0	1.0	1.0	0.0	1.0	1.0	0.0	0.0	0.0	0.0	0.0
AICDA	57379	symbol	H. sapiens	57379	H. sapiens	AICDA	activation induced cytidine deaminase	GO:0090310 negative regulation of DNA methylation-dependent heterochromatin assembly;GO:0031452 negative regulation of heterochromatin assembly;GO:0120262 negative regulation of heterochromatin organization		Predicted intracellular proteins; ENZYME proteins:Hydrolases; Disease related genes; Potential drug targets; Human disease related genes:Immune system diseases:Primary immunodeficiency; Enzymes			(M28)PID IL4 2PATHWAY		0.0	1.0	0.0	1.0	0.0	1.0	0.0	0.0	0.0	0.0	0.0	0.0	0.0	0.0	0.0	1.0	0.0	0.0	1.0	0.0
PI16	221476	symbol	H. sapiens	221476	H. sapiens	PI16	peptidase inhibitor 16	GO:0061052 negative regulation of cell growth involved in cardiac muscle cell development;GO:0061050 regulation of cell growth involved in cardiac muscle cell development;GO:0055022 negative regulation of cardiac muscle tissue growth		Predicted secreted proteins; CD markers					0.0	0.0	0.0	0.0	0.0	0.0	0.0	0.0	0.0	0.0	0.0	0.0	0.0	0.0	0.0	0.0	0.0	0.0	0.0	0.0
EMR4P	326342	gene_synonym	H. sapiens	326342	H. sapiens	ADGRE4P	adhesion G protein-coupled receptor E4, pseudogene								0.0	0.0	0.0	0.0	0.0	0.0	0.0	0.0	0.0	0.0	0.0	0.0	0.0	0.0	0.0	0.0	0.0	0.0	0.0	0.0
CR2	1380	symbol	H. sapiens	1380	H. sapiens	CR2	complement C3d receptor 2	GO:0045959 negative regulation of complement activation, classical pathway;GO:0030450 regulation of complement activation, classical pathway;GO:0002924 negative regulation of humoral immune response mediated by circulating immunoglobulin		Disease related genes; Human disease related genes:Immune system diseases:Primary immunodeficiency; Predicted intracellular proteins; CD markers			(M8626)SIG BCR SIGNALING PATHWAY	(M5921)HALLMARK COMPLEMENT	0.0	1.0	0.0	0.0	0.0	1.0	1.0	0.0	1.0	0.0	0.0	0.0	0.0	1.0	1.0	1.0	1.0	0.0	1.0	0.0
GBP6	163351	symbol	H. sapiens	163351	H. sapiens	GBP6	guanylate binding protein family member 6	GO:0042832 defense response to protozoan;GO:0001562 response to protozoan;GO:0071346 cellular response to interferon-gamma		Predicted intracellular proteins				(M5913)HALLMARK INTERFERON GAMMA RESPONSE	0.0	0.0	1.0	1.0	0.0	0.0	0.0	0.0	0.0	0.0	0.0	0.0	0.0	0.0	0.0	0.0	0.0	0.0	0.0	0.0
KRT24	192666	symbol	H. sapiens	192666	H. sapiens	KRT24	keratin 24	GO:0008150 biological_process		Predicted intracellular proteins	Cytosol;Intermediate filaments (Approved)				0.0	0.0	0.0	0.0	1.0	0.0	0.0	0.0	0.0	0.0	0.0	0.0	0.0	0.0	0.0	0.0	0.0	0.0	0.0	0.0
HHIPL2	79802	symbol	H. sapiens	79802	H. sapiens	HHIPL2	HHIP like 2			Predicted secreted proteins	Mitochondria (Uncertain); Additional: Cytosol				0.0	0.0	0.0	0.0	0.0	0.0	0.0	0.0	0.0	0.0	0.0	0.0	0.0	0.0	0.0	0.0	0.0	0.0	0.0	0.0
SIGLEC9	27180	symbol	H. sapiens	27180	H. sapiens	SIGLEC9	sialic acid binding Ig like lectin 9	GO:0007155 cell adhesion;GO:0007166 cell surface receptor signaling pathway;GO:0007165 signal transduction							0.0	0.0	0.0	0.0	0.0	0.0	0.0	1.0	0.0	0.0	0.0	0.0	0.0	0.0	0.0	0.0	0.0	0.0	0.0	0.0
LAIR1	3903	symbol	H. sapiens	3903	H. sapiens	LAIR1	leukocyte associated immunoglobulin like receptor 1	GO:0002250 adaptive immune response;GO:0006955 immune response;GO:0002376 immune system process		Predicted intracellular proteins; CD markers	Plasma membrane (Supported)				0.0	1.0	0.0	0.0	0.0	0.0	0.0	1.0	0.0	0.0	0.0	0.0	0.0	0.0	0.0	0.0	0.0	0.0	0.0	0.0
CYP2J2	1573	symbol	H. sapiens	1573	H. sapiens	CYP2J2	cytochrome P450 family 2 subfamily J member 2	GO:0019373 epoxygenase P450 pathway;GO:0043651 linoleic acid metabolic process;GO:0019369 arachidonic acid metabolic process		ENZYME proteins:Oxidoreductases; ENZYME proteins:Isomerase; Predicted intracellular proteins; Enzymes				(M5934)HALLMARK XENOBIOTIC METABOLISM	0.0	0.0	0.0	0.0	0.0	0.0	0.0	0.0	0.0	0.0	0.0	0.0	0.0	0.0	0.0	0.0	0.0	0.0	0.0	0.0
SUSD3	203328	symbol	H. sapiens	203328	H. sapiens	SUSD3	sushi domain containing 3								0.0	0.0	0.0	0.0	0.0	0.0	0.0	0.0	0.0	0.0	0.0	0.0	0.0	0.0	0.0	0.0	0.0	0.0	0.0	0.0
SEMA5A	9037	symbol	H. sapiens	9037	H. sapiens	SEMA5A	semaphorin 5A	GO:1990256 signal clustering;GO:0002043 blood vessel endothelial cell proliferation involved in sprouting angiogenesis;GO:0048842 positive regulation of axon extension involved in axon guidance		Predicted intracellular proteins; Human disease related genes:Other congenital disorders:Chromosomal abnormalities			(M5880)NABA ECM AFFILIATED; (M5885)NABA MATRISOME ASSOCIATED; (M5889)NABA MATRISOME		1.0	0.0	1.0	0.0	0.0	0.0	0.0	0.0	1.0	1.0	0.0	1.0	0.0	0.0	0.0	0.0	0.0	0.0	0.0	1.0
CXCL10	3627	symbol	H. sapiens	3627	H. sapiens	CXCL10	C-X-C motif chemokine ligand 10	GO:1901740 negative regulation of myoblast fusion;GO:0034242 negative regulation of syncytium formation by plasma membrane fusion;GO:1901509 regulation of endothelial tube morphogenesis		Predicted secreted proteins; Cancer-related genes:Candidate cancer biomarkers; Human disease related genes:Immune system diseases:Allergies and autoimmune diseases		N-Methylleucine; Eldelumab; Clove oil	(M222)PID CXCR3 PATHWAY; (M5883)NABA SECRETED FACTORS; (M5885)NABA MATRISOME ASSOCIATED	(M5897)HALLMARK IL6 JAK STAT3 SIGNALING; (M5911)HALLMARK INTERFERON ALPHA RESPONSE; (M5947)HALLMARK IL2 STAT5 SIGNALING	1.0	0.0	1.0	1.0	0.0	1.0	0.0	0.0	0.0	1.0	0.0	0.0	1.0	0.0	1.0	0.0	0.0	0.0	0.0	0.0
CCL4	6351	symbol	H. sapiens	6351	H. sapiens	CCL4	C-C motif chemokine ligand 4	GO:2000503 positive regulation of natural killer cell chemotaxis;GO:2000501 regulation of natural killer cell chemotaxis;GO:0043922 negative regulation by host of viral transcription		Predicted secreted proteins; Cancer-related genes:Candidate cancer biomarkers			(M54)PID IL12 2PATHWAY; (M5883)NABA SECRETED FACTORS; (M5885)NABA MATRISOME ASSOCIATED	(M5890)HALLMARK TNFA SIGNALING VIA NFKB; (M5950)HALLMARK ALLOGRAFT REJECTION	1.0	0.0	1.0	0.0	0.0	0.0	0.0	0.0	0.0	1.0	0.0	0.0	1.0	0.0	0.0	0.0	0.0	0.0	0.0	0.0
SLC28A2	9153	symbol	H. sapiens	9153	H. sapiens	SLC28A2	solute carrier family 28 member 2	GO:0035340 inosine transport;GO:0032238 adenosine transport;GO:0015860 purine nucleoside transmembrane transport		Transporters:Electrochemical Potential-driven transporters	Nuclear membrane (Approved); Additional: Cytosol;Nucleoplasm			(M5932)HALLMARK INFLAMMATORY RESPONSE	0.0	0.0	0.0	0.0	0.0	0.0	0.0	0.0	0.0	0.0	0.0	0.0	0.0	0.0	0.0	0.0	0.0	0.0	0.0	0.0
CTTNBP2	83992	symbol	H. sapiens	83992	H. sapiens	CTTNBP2	cortactin binding protein 2	GO:1905274 regulation of modification of postsynaptic actin cytoskeleton;GO:0099159 regulation of modification of postsynaptic structure;GO:1905244 regulation of modification of synaptic structure		Predicted intracellular proteins	Cytosol;Midbody ring (Approved)				0.0	0.0	0.0	0.0	0.0	0.0	0.0	0.0	0.0	0.0	0.0	0.0	0.0	0.0	0.0	0.0	0.0	0.0	0.0	0.0
ITGAM	3684	symbol	H. sapiens	3684	H. sapiens	ITGAM	integrin subunit alpha M	GO:0045914 negative regulation of catecholamine metabolic process;GO:0045963 negative regulation of dopamine metabolic process;GO:0110090 positive regulation of hippocampal neuron apoptotic process		Disease related genes; Predicted intracellular proteins; Cancer-related genes:Candidate cancer biomarkers; CD markers			(M47)PID INTEGRIN CS PATHWAY; (M169)PID INTEGRIN2 PATHWAY; (M159)PID AMB2 NEUTROPHILS PATHWAY	(M5921)HALLMARK COMPLEMENT	0.0	0.0	1.0	0.0	0.0	1.0	1.0	0.0	1.0	1.0	0.0	0.0	0.0	1.0	0.0	0.0	1.0	1.0	1.0	0.0
RP11-467L13.5						None	None	None	None	None	None	None	None	None	nan	nan	nan	nan	nan	nan	nan	nan	nan	nan	nan	nan	nan	nan	nan	nan	nan	nan	nan	nan
TRG-AS1	100506776	symbol	H. sapiens	100506776	H. sapiens	TRG-AS1	T cell receptor gamma locus antisense RNA 1								0.0	0.0	0.0	0.0	0.0	0.0	0.0	0.0	0.0	0.0	0.0	0.0	0.0	0.0	0.0	0.0	0.0	0.0	0.0	0.0
MYCL	4610	symbol	H. sapiens	4610	H. sapiens	MYCL	MYCL proto-oncogene, bHLH transcription factor	GO:0045607 regulation of inner ear auditory receptor cell differentiation;GO:0045631 regulation of mechanoreceptor differentiation;GO:2000980 regulation of inner ear receptor cell differentiation		Cancer-related genes; Transcription factors:Basic domains; Predicted intracellular proteins	Nucleoplasm (Enhanced); Additional: Mitotic chromosome				0.0	0.0	0.0	0.0	0.0	0.0	0.0	0.0	0.0	0.0	0.0	0.0	0.0	0.0	0.0	0.0	0.0	0.0	0.0	0.0
VSIG4	11326	symbol	H. sapiens	11326	H. sapiens	VSIG4	V-set and immunoglobulin domain containing 4	GO:0045957 negative regulation of complement activation, alternative pathway;GO:0030451 regulation of complement activation, alternative pathway;GO:0045916 negative regulation of complement activation			Cytosol;Plasma membrane (Uncertain); Additional: Nucleoli				0.0	0.0	0.0	0.0	0.0	1.0	1.0	0.0	1.0	1.0	0.0	1.0	0.0	1.0	1.0	0.0	0.0	0.0	1.0	0.0
CD300LF	146722	symbol	H. sapiens	146722	H. sapiens	CD300LF	CD300 molecule like family member f	GO:0035772 interleukin-13-mediated signaling pathway;GO:2000426 negative regulation of apoptotic cell clearance;GO:0034125 negative regulation of MyD88-dependent toll-like receptor signaling pathway		Predicted intracellular proteins; CD markers					0.0	0.0	1.0	0.0	0.0	0.0	1.0	1.0	1.0	0.0	0.0	0.0	0.0	0.0	0.0	0.0	0.0	0.0	0.0	0.0
SIGLEC11	114132	symbol	H. sapiens	114132	H. sapiens	SIGLEC11	sialic acid binding Ig like lectin 11	GO:0007155 cell adhesion;GO:0009987 cellular process;GO:0008150 biological_process			Golgi apparatus (Uncertain); Additional: Nucleoplasm				0.0	0.0	0.0	0.0	0.0	0.0	0.0	1.0	0.0	0.0	0.0	0.0	0.0	0.0	0.0	0.0	0.0	0.0	0.0	0.0
AKR1B10	57016	symbol	H. sapiens	57016	H. sapiens	AKR1B10	aldo-keto reductase family 1 member B10	GO:0006714 sesquiterpenoid metabolic process;GO:0016107 sesquiterpenoid catabolic process;GO:0016487 farnesol metabolic process		Predicted secreted proteins; ENZYME proteins:Oxidoreductases; Predicted intracellular proteins; Enzymes	Cytosol (Supported); Additional: Plasma membrane	Sulindac; Fidarestat; Tolrestat; Nicotinamide adenine dinucleotide phosphate; Exisulind; Zopolrestat		(M5956)HALLMARK KRAS SIGNALING DN	0.0	0.0	0.0	0.0	0.0	0.0	0.0	0.0	0.0	0.0	0.0	0.0	0.0	0.0	0.0	0.0	0.0	0.0	0.0	0.0
PNLDC1	154197	symbol	H. sapiens	154197	H. sapiens	PNLDC1	PARN like ribonuclease domain containing exonuclease 1	GO:1990511 piRNA biosynthetic process;GO:0000289 nuclear-transcribed mRNA poly(A) tail shortening;GO:0034587 piRNA metabolic process		Enzymes; ENZYME proteins:Hydrolases					0.0	0.0	0.0	0.0	0.0	0.0	0.0	0.0	0.0	0.0	0.0	0.0	0.0	0.0	0.0	0.0	0.0	0.0	0.0	0.0
LEFTY1	10637	symbol	H. sapiens	10637	H. sapiens	LEFTY1	left-right determination factor 1	GO:0010862 positive regulation of pathway-restricted SMAD protein phosphorylation;GO:0060395 SMAD protein signal transduction;GO:0060393 regulation of pathway-restricted SMAD protein phosphorylation		Predicted secreted proteins			(M5883)NABA SECRETED FACTORS; (M5885)NABA MATRISOME ASSOCIATED; (M5889)NABA MATRISOME		1.0	0.0	0.0	0.0	0.0	0.0	0.0	0.0	0.0	0.0	0.0	0.0	0.0	0.0	0.0	0.0	0.0	0.0	0.0	0.0
ZAP70	7535	symbol	H. sapiens	7535	H. sapiens	ZAP70	zeta chain of T cell receptor associated protein kinase 70	GO:0070489 T cell aggregation;GO:0043366 beta selection;GO:0071593 lymphocyte aggregation	Tyr protein kinase family	RAS pathway related proteins; Predicted intracellular proteins; ENZYME proteins:Transferases; Disease related genes; Kinases:Tyr protein kinases; Potential drug targets; Human disease related genes:Immune system diseases:Primary immunodeficiency; Enzymes		Staurosporine; Fostamatinib	(M141)PID PI3KCI PATHWAY; (M88)PID CD8 TCR PATHWAY; (M34)PID TCR PATHWAY	(M5950)HALLMARK ALLOGRAFT REJECTION	0.0	1.0	1.0	0.0	0.0	1.0	1.0	1.0	1.0	0.0	0.0	0.0	0.0	0.0	0.0	0.0	0.0	1.0	0.0	0.0
KREMEN2	79412	symbol	H. sapiens	79412	H. sapiens	KREMEN2	kringle containing transmembrane protein 2	GO:0030279 negative regulation of ossification;GO:0030278 regulation of ossification;GO:0048736 appendage development		Predicted intracellular proteins	Nucleoli (Approved)		(M77)PID WNT SIGNALING PATHWAY; (M70)PID PS1 PATHWAY		0.0	0.0	0.0	0.0	0.0	0.0	0.0	0.0	0.0	0.0	0.0	0.0	0.0	0.0	0.0	0.0	0.0	0.0	0.0	0.0
CCL3	6348	symbol	H. sapiens	6348	H. sapiens	CCL3	C-C motif chemokine ligand 3	GO:0002278 eosinophil activation involved in immune response;GO:0043307 eosinophil activation;GO:0043308 eosinophil degranulation		Predicted secreted proteins; Cancer-related genes:Candidate cancer biomarkers		ROX-888	(M54)PID IL12 2PATHWAY; (M5883)NABA SECRETED FACTORS; (M5885)NABA MATRISOME ASSOCIATED		1.0	0.0	1.0	1.0	0.0	1.0	0.0	0.0	1.0	1.0	1.0	1.0	1.0	0.0	0.0	0.0	0.0	0.0	1.0	0.0
SLAMF1	6504	symbol	H. sapiens	6504	H. sapiens	SLAMF1	signaling lymphocytic activation molecule family member 1	GO:0001787 natural killer cell proliferation;GO:2000349 negative regulation of CD40 signaling pathway;GO:0002277 myeloid dendritic cell activation involved in immune response		Predicted secreted proteins; CD markers				(M5932)HALLMARK INFLAMMATORY RESPONSE	0.0	1.0	1.0	0.0	0.0	1.0	1.0	0.0	1.0	1.0	1.0	0.0	0.0	1.0	0.0	0.0	0.0	0.0	0.0	0.0
MS4A1	931	symbol	H. sapiens	931	H. sapiens	MS4A1	membrane spanning 4-domains A1	GO:1902656 calcium ion import into cytosol;GO:0002115 store-operated calcium entry;GO:0042100 B cell proliferation		Transporters:Transporter channels and pores; CD markers; Disease related genes; Human disease related genes:Immune system diseases:Primary immunodeficiency; Predicted intracellular proteins; FDA approved drug targets:Small molecule drugs; FDA approved drug targets:Biotech drugs	Plasma membrane (Supported)	Rituximab; Ibritumomab tiuxetan; Tositumomab; Ofatumumab; Obinutuzumab; Technetium Tc-99m nofetumomab merpentan; Ocrelizumab			0.0	0.0	0.0	1.0	0.0	1.0	1.0	0.0	0.0	0.0	0.0	0.0	0.0	0.0	1.0	1.0	1.0	0.0	0.0	0.0
IFI27	3429	symbol	H. sapiens	3429	H. sapiens	IFI27	interferon alpha inducible protein 27	GO:0044827 modulation by host of viral genome replication;GO:0046825 regulation of protein export from nucleus;GO:0044788 modulation by host of viral process		Predicted intracellular proteins			(M295)SIG PIP3 SIGNALING IN CARDIAC MYOCTES	(M5911)HALLMARK INTERFERON ALPHA RESPONSE; (M5913)HALLMARK INTERFERON GAMMA RESPONSE	0.0	0.0	1.0	0.0	0.0	0.0	0.0	0.0	0.0	0.0	0.0	0.0	0.0	0.0	0.0	0.0	0.0	0.0	0.0	0.0
SAA2	6289	symbol	H. sapiens	6289	H. sapiens	SAA2	serum amyloid A2	GO:0006953 acute-phase response;GO:0002526 acute inflammatory response;GO:0006954 inflammatory response		Disease related genes; Predicted secreted proteins					0.0	0.0	1.0	0.0	0.0	0.0	0.0	0.0	0.0	0.0	0.0	0.0	0.0	0.0	0.0	0.0	0.0	0.0	0.0	0.0
SLC22A16	85413	symbol	H. sapiens	85413	H. sapiens	SLC22A16	solute carrier family 22 member 16	GO:1902603 carnitine transmembrane transport;GO:0015879 carnitine transport;GO:0015838 amino-acid betaine transport		Transporters:Electrochemical Potential-driven transporters	Cytosol;Plasma membrane (Approved)				0.0	0.0	0.0	0.0	0.0	0.0	0.0	0.0	0.0	0.0	0.0	0.0	0.0	0.0	0.0	0.0	0.0	0.0	0.0	0.0
CXCR3	2833	symbol	H. sapiens	2833	H. sapiens	CXCR3	C-X-C motif chemokine receptor 3	GO:0070098 chemokine-mediated signaling pathway;GO:1990868 response to chemokine;GO:1990869 cellular response to chemokine		G-protein coupled receptors:Chemokines and chemotactic factors receptors; G-protein coupled receptors:GPCRs excl olfactory receptors; CD markers			(M222)PID CXCR3 PATHWAY	(M5950)HALLMARK ALLOGRAFT REJECTION	0.0	0.0	1.0	0.0	0.0	0.0	0.0	0.0	1.0	0.0	0.0	0.0	1.0	0.0	0.0	0.0	0.0	0.0	0.0	0.0
RP11-259O2.1						None	None	None	None	None	None	None	None	None	nan	nan	nan	nan	nan	nan	nan	nan	nan	nan	nan	nan	nan	nan	nan	nan	nan	nan	nan	nan
DLGAP1	9229	symbol	H. sapiens	9229	H. sapiens	DLGAP1	DLG associated protein 1	GO:0098962 regulation of postsynaptic neurotransmitter receptor activity;GO:0099601 regulation of neurotransmitter receptor activity;GO:0031644 regulation of nervous system process		Predicted intracellular proteins	Cytosol;Vesicles (Approved)				0.0	0.0	0.0	0.0	0.0	0.0	0.0	0.0	0.0	0.0	0.0	0.0	0.0	0.0	0.0	0.0	0.0	0.0	0.0	0.0
TNFRSF11B	4982	symbol	H. sapiens	4982	H. sapiens	TNFRSF11B	TNF receptor superfamily member 11b	GO:0042483 negative regulation of odontogenesis;GO:0042489 negative regulation of odontogenesis of dentin-containing tooth;GO:0110111 negative regulation of animal organ morphogenesis		Predicted secreted proteins; Human disease related genes:Musculoskeletal diseases:Skeletal diseases; Candidate cardiovascular disease genes; Disease related genes; Cancer-related genes:Candidate cancer biomarkers				(M5915)HALLMARK APICAL JUNCTION; (M5930)HALLMARK EPITHELIAL MESENCHYMAL TRANSITION	0.0	0.0	1.0	0.0	0.0	0.0	0.0	0.0	1.0	0.0	0.0	0.0	0.0	0.0	0.0	0.0	0.0	0.0	0.0	0.0
ALOX5AP	241	symbol	H. sapiens	241	H. sapiens	ALOX5AP	arachidonate 5-lipoxygenase activating protein	GO:0002538 arachidonic acid metabolite production involved in inflammatory response;GO:0002540 leukotriene production involved in inflammatory response;GO:0019372 lipoxygenase pathway		Disease related genes		DG031; AM103; Fiboflapon			0.0	0.0	1.0	0.0	0.0	0.0	0.0	0.0	0.0	1.0	0.0	1.0	0.0	0.0	0.0	0.0	0.0	0.0	0.0	0.0
TGFB2	7042	symbol	H. sapiens	7042	H. sapiens	TGFB2	transforming growth factor beta 2	GO:1903701 substantia propria of cornea development;GO:0042704 uterine wall breakdown;GO:0062044 negative regulation of cardiac epithelial to mesenchymal transition		Human disease related genes:Immune system diseases:Allergies and autoimmune diseases; Human disease related genes:Congenital malformations:Congenital malformations of the circulatory system; Predicted secreted proteins; Disease related genes; Cancer-related genes:Candidate cancer biomarkers	Vesicles (Approved)		(M11736)SA MMP CYTOKINE CONNECTION; (M211)PID HEDGEHOG 2PATHWAY; (M33)PID GLYPICAN 1PATHWAY	(M5902)HALLMARK APOPTOSIS; (M5934)HALLMARK XENOBIOTIC METABOLISM; (M5950)HALLMARK ALLOGRAFT REJECTION	1.0	0.0	1.0	0.0	1.0	1.0	1.0	0.0	1.0	0.0	0.0	0.0	0.0	1.0	0.0	0.0	0.0	1.0	1.0	0.0
GPR55	9290	symbol	H. sapiens	9290	H. sapiens	GPR55	G protein-coupled receptor 55	GO:0038171 cannabinoid signaling pathway;GO:0045453 bone resorption;GO:0007202 activation of phospholipase C activity		G-protein coupled receptors:GPCRs excl olfactory receptors		Rimonabant; Cannabidiol; Tetrahydrocannabivarin; Medical Cannabis; Nabiximols			0.0	0.0	0.0	0.0	0.0	0.0	0.0	0.0	1.0	0.0	0.0	0.0	1.0	0.0	0.0	0.0	0.0	0.0	0.0	0.0
RP11-54O7.18						None	None	None	None	None	None	None	None	None	nan	nan	nan	nan	nan	nan	nan	nan	nan	nan	nan	nan	nan	nan	nan	nan	nan	nan	nan	nan
AC108142.1						None	None	None	None	None	None	None	None	None	nan	nan	nan	nan	nan	nan	nan	nan	nan	nan	nan	nan	nan	nan	nan	nan	nan	nan	nan	nan
AC093627.10						None	None	None	None	None	None	None	None	None	nan	nan	nan	nan	nan	nan	nan	nan	nan	nan	nan	nan	nan	nan	nan	nan	nan	nan	nan	nan
SOX15	6665	symbol	H. sapiens	6665	H. sapiens	SOX15	SRY-box transcription factor 15	GO:0014718 positive regulation of satellite cell activation involved in skeletal muscle regeneration;GO:0014717 regulation of satellite cell activation involved in skeletal muscle regeneration;GO:0048627 myoblast development		Transcription factors:Other all-alpha-helical DNA-binding domains; Predicted intracellular proteins	Nucleoplasm (Supported); Additional: Golgi apparatus;Nucleoli;Vesicles				0.0	0.0	0.0	0.0	0.0	0.0	0.0	0.0	1.0	0.0	0.0	0.0	0.0	0.0	0.0	0.0	0.0	0.0	0.0	0.0
NPFFR1	64106	symbol	H. sapiens	64106	H. sapiens	NPFFR1	neuropeptide FF receptor 1	GO:0007218 neuropeptide signaling pathway;GO:0007186 G protein-coupled receptor signaling pathway;GO:0007165 signal transduction		G-protein coupled receptors:GPCRs excl olfactory receptors					0.0	0.0	0.0	0.0	0.0	0.0	0.0	0.0	0.0	0.0	0.0	0.0	1.0	0.0	0.0	0.0	0.0	0.0	0.0	0.0
VSNL1	7447	symbol	H. sapiens	7447	H. sapiens	VSNL1	visinin like 1	GO:0035774 positive regulation of insulin secretion involved in cellular response to glucose stimulus;GO:0046676 negative regulation of insulin secretion;GO:0090278 negative regulation of peptide hormone secretion		Predicted intracellular proteins	Cytosol (Approved)				0.0	0.0	0.0	0.0	0.0	0.0	0.0	0.0	0.0	0.0	0.0	0.0	0.0	0.0	0.0	0.0	0.0	0.0	0.0	0.0
GLT1D1	144423	symbol	H. sapiens	144423	H. sapiens	GLT1D1	glycosyltransferase 1 domain containing 1			Predicted intracellular proteins; Predicted secreted proteins	Cytosol (Enhanced)				0.0	0.0	0.0	0.0	0.0	0.0	0.0	0.0	0.0	0.0	0.0	0.0	0.0	0.0	0.0	0.0	0.0	0.0	0.0	0.0
RP11-281P11.1						None	None	None	None	None	None	None	None	None	nan	nan	nan	nan	nan	nan	nan	nan	nan	nan	nan	nan	nan	nan	nan	nan	nan	nan	nan	nan
RAD1P2	100129690	symbol	H. sapiens	100129690	H. sapiens	RAD1P2	RAD1 pseudogene 2								0.0	0.0	0.0	0.0	0.0	0.0	0.0	0.0	0.0	0.0	0.0	0.0	0.0	0.0	0.0	0.0	0.0	0.0	0.0	0.0
MT2P1	4503	symbol	H. sapiens	4503	H. sapiens	MT2P1	metallothionein 2 pseudogene 1								0.0	0.0	0.0	0.0	0.0	0.0	0.0	0.0	0.0	0.0	0.0	0.0	0.0	0.0	0.0	0.0	0.0	0.0	0.0	0.0
CCDC169	728591	symbol	H. sapiens	728591	H. sapiens	CCDC169	coiled-coil domain containing 169			Predicted intracellular proteins					0.0	0.0	0.0	0.0	0.0	0.0	0.0	0.0	0.0	0.0	0.0	0.0	0.0	0.0	0.0	0.0	0.0	0.0	0.0	0.0
PDCD1	5133	symbol	H. sapiens	5133	H. sapiens	PDCD1	programmed cell death 1	GO:0002644 negative regulation of tolerance induction;GO:0070234 positive regulation of T cell apoptotic process;GO:0070230 positive regulation of lymphocyte apoptotic process		Human disease related genes:Nervous system diseases:Other nervous and sensory system diseases; Human disease related genes:Immune system diseases:Allergies and autoimmune diseases; Human disease related genes:Immune system diseases:Other immune system diseases; CD markers; Disease related genes; Predicted intracellular proteins; FDA approved drug targets:Biotech drugs		CT-011; Nivolumab; Pembrolizumab; Cemiplimab		(M5956)HALLMARK KRAS SIGNALING DN	0.0	1.0	0.0	0.0	0.0	0.0	0.0	1.0	1.0	0.0	0.0	0.0	0.0	1.0	1.0	1.0	0.0	0.0	0.0	0.0
SLC6A17	388662	symbol	H. sapiens	388662	H. sapiens	SLC6A17	solute carrier family 6 member 17	GO:0015820 leucine transport;GO:0015824 proline transport;GO:0015803 branched-chain amino acid transport		Disease related genes; Transporters:Electrochemical Potential-driven transporters; Potential drug targets; Human disease related genes:Other diseases:Mental and behavioural disorders	Mitochondria (Approved)				0.0	0.0	0.0	0.0	0.0	0.0	0.0	0.0	0.0	0.0	0.0	0.0	0.0	0.0	0.0	0.0	0.0	0.0	0.0	0.0
AC093063.2						None	None	None	None	None	None	None	None	None	nan	nan	nan	nan	nan	nan	nan	nan	nan	nan	nan	nan	nan	nan	nan	nan	nan	nan	nan	nan
IGFN1	91156	symbol	H. sapiens	91156	H. sapiens	IGFN1	immunoglobulin like and fibronectin type III domain containing 1	GO:0010842 retina layer formation;GO:0060042 retina morphogenesis in camera-type eye;GO:0003407 neural retina development		Predicted intracellular proteins	Midbody ring (Approved)				0.0	0.0	0.0	0.0	0.0	0.0	0.0	0.0	0.0	0.0	0.0	0.0	0.0	0.0	0.0	0.0	0.0	1.0	0.0	0.0
NCR3	259197	symbol	H. sapiens	259197	H. sapiens	NCR3	natural cytotoxicity triggering receptor 3	GO:0045954 positive regulation of natural killer cell mediated cytotoxicity;GO:0002717 positive regulation of natural killer cell mediated immunity;GO:0042269 regulation of natural killer cell mediated cytotoxicity		CD markers					0.0	0.0	1.0	0.0	0.0	1.0	1.0	1.0	0.0	1.0	0.0	1.0	0.0	1.0	0.0	0.0	0.0	0.0	0.0	0.0
TNFAIP8L3	388121	symbol	H. sapiens	388121	H. sapiens	TNFAIP8L3	TNF alpha induced protein 8 like 3	GO:0043552 positive regulation of phosphatidylinositol 3-kinase activity;GO:0090218 positive regulation of lipid kinase activity;GO:0120009 intermembrane lipid transfer		Predicted intracellular proteins	Cytosol (Supported); Additional: Nucleoplasm				0.0	0.0	0.0	0.0	0.0	0.0	0.0	0.0	0.0	0.0	0.0	0.0	0.0	0.0	0.0	0.0	0.0	0.0	0.0	0.0
GBX1	2636	symbol	H. sapiens	2636	H. sapiens	GBX1	gastrulation brain homeobox 1	GO:0097374 sensory neuron axon guidance;GO:0019230 proprioception;GO:0050884 neuromuscular process controlling posture		Transcription factors:Helix-turn-helix domains; Predicted intracellular proteins					0.0	0.0	1.0	0.0	0.0	0.0	0.0	0.0	0.0	0.0	0.0	0.0	0.0	0.0	0.0	0.0	0.0	0.0	0.0	0.0
IL7R	3575	symbol	H. sapiens	3575	H. sapiens	IL7R	interleukin 7 receptor	GO:0038111 interleukin-7-mediated signaling pathway;GO:0033089 positive regulation of T cell differentiation in thymus;GO:0001915 negative regulation of T cell mediated cytotoxicity		Cancer-related genes:Mutated cancer genes; Disease related genes; CD markers; Human disease related genes:Immune system diseases:Primary immunodeficiency; Predicted intracellular proteins	Plasma membrane (Supported)			(M5890)HALLMARK TNFA SIGNALING VIA NFKB; (M5932)HALLMARK INFLAMMATORY RESPONSE; (M5953)HALLMARK KRAS SIGNALING UP	0.0	0.0	1.0	1.0	0.0	1.0	0.0	0.0	1.0	1.0	0.0	0.0	0.0	1.0	0.0	0.0	1.0	0.0	0.0	0.0
TNRC18P1	644962	symbol	H. sapiens	644962	H. sapiens	TNRC18P1	trinucleotide repeat containing 18 pseudogene 1								0.0	0.0	0.0	0.0	0.0	0.0	0.0	0.0	0.0	0.0	0.0	0.0	0.0	0.0	0.0	0.0	0.0	0.0	0.0	0.0
ITGB2-AS1	100505746	symbol	H. sapiens	100505746	H. sapiens	ITGB2-AS1	ITGB2 antisense RNA 1								0.0	0.0	0.0	0.0	0.0	0.0	0.0	0.0	0.0	0.0	0.0	0.0	0.0	0.0	0.0	0.0	0.0	0.0	0.0	0.0
GPR68	8111	symbol	H. sapiens	8111	H. sapiens	GPR68	G protein-coupled receptor 68	GO:2001206 positive regulation of osteoclast development;GO:0045656 negative regulation of monocyte differentiation;GO:2001204 regulation of osteoclast development		Disease related genes; Human disease related genes:Digestive system diseases:Mouth and dental diseases; G-protein coupled receptors:GPCRs excl olfactory receptors; Potential drug targets					0.0	0.0	1.0	0.0	0.0	0.0	0.0	0.0	1.0	0.0	0.0	0.0	1.0	0.0	0.0	0.0	0.0	0.0	0.0	0.0
ANGPT4	51378	symbol	H. sapiens	51378	H. sapiens	ANGPT4	angiopoietin 4	GO:0007171 activation of transmembrane receptor protein tyrosine kinase activity;GO:0043536 positive regulation of blood vessel endothelial cell migration;GO:0043537 negative regulation of blood vessel endothelial cell migration		RAS pathway related proteins; Predicted secreted proteins			(M92)PID ANGIOPOIETIN RECEPTOR PATHWAY; (M5883)NABA SECRETED FACTORS; (M5885)NABA MATRISOME ASSOCIATED		1.0	0.0	0.0	0.0	0.0	0.0	0.0	0.0	0.0	0.0	0.0	0.0	0.0	0.0	0.0	0.0	0.0	0.0	0.0	0.0
AC006129.2						None	None	None	None	None	None	None	None	None	nan	nan	nan	nan	nan	nan	nan	nan	nan	nan	nan	nan	nan	nan	nan	nan	nan	nan	nan	nan
TMEM97	27346	symbol	H. sapiens	27346	H. sapiens	TMEM97	transmembrane protein 97	GO:0042632 cholesterol homeostasis;GO:0055092 sterol homeostasis;GO:0055088 lipid homeostasis		Transporters:Accessory Factors Involved in Transport	Endoplasmic reticulum (Supported)			(M5928)HALLMARK MYC TARGETS V2; (M5892)HALLMARK CHOLESTEROL HOMEOSTASIS; (M5924)HALLMARK MTORC1 SIGNALING	0.0	0.0	0.0	0.0	0.0	0.0	0.0	0.0	0.0	0.0	0.0	0.0	0.0	0.0	0.0	0.0	0.0	0.0	0.0	0.0
SLFN12L	100506736	symbol	H. sapiens	100506736	H. sapiens	SLFN12L	schlafen family member 12 like								0.0	0.0	0.0	0.0	0.0	0.0	0.0	0.0	0.0	0.0	0.0	0.0	0.0	0.0	0.0	0.0	0.0	0.0	0.0	0.0
CTC-558O2.1						None	None	None	None	None	None	None	None	None	nan	nan	nan	nan	nan	nan	nan	nan	nan	nan	nan	nan	nan	nan	nan	nan	nan	nan	nan	nan
ZNF66	7617	symbol	H. sapiens	7617	H. sapiens	ZNF66	zinc finger protein 66	GO:0006357 regulation of transcription by RNA polymerase II;GO:0006355 regulation of transcription, DNA-templated;GO:1903506 regulation of nucleic acid-templated transcription		Transcription factors:Zinc-coordinating DNA-binding domains; Predicted intracellular proteins					0.0	0.0	0.0	0.0	0.0	0.0	0.0	0.0	0.0	0.0	0.0	0.0	0.0	0.0	0.0	0.0	0.0	0.0	0.0	0.0
PTPN22	26191	symbol	H. sapiens	26191	H. sapiens	PTPN22	protein tyrosine phosphatase non-receptor type 22	GO:0035644 phosphoanandamide dephosphorylation;GO:0071661 regulation of granzyme B production;GO:0071663 positive regulation of granzyme B production		Human disease related genes:Skin diseases:Skin and soft tissue diseases; Predicted intracellular proteins; ENZYME proteins:Hydrolases; Human disease related genes:Immune system diseases:Allergies and autoimmune diseases; Human disease related genes:Immune system diseases:Other immune system diseases; Human disease related genes:Endocrine and metabolic diseases:Diabetes; Disease related genes; Hum…	Nucleoplasm (Uncertain); Additional: Plasma membrane;Vesicles				0.0	0.0	0.0	1.0	0.0	1.0	1.0	1.0	1.0	1.0	1.0	1.0	0.0	1.0	0.0	0.0	0.0	0.0	0.0	0.0
NTNG1	22854	symbol	H. sapiens	22854	H. sapiens	NTNG1	netrin G1	GO:0070831 basement membrane assembly;GO:0150011 regulation of neuron projection arborization;GO:0099560 synaptic membrane adhesion		Predicted intracellular proteins	Plasma membrane (Supported)		(M5887)NABA BASEMENT MEMBRANES; (M3008)NABA ECM GLYCOPROTEINS; (M5884)NABA CORE MATRISOME	(M5916)HALLMARK APICAL SURFACE	0.0	0.0	0.0	0.0	0.0	0.0	0.0	0.0	0.0	0.0	0.0	0.0	0.0	0.0	0.0	0.0	0.0	1.0	0.0	0.0
AC115617.2						None	None	None	None	None	None	None	None	None	nan	nan	nan	nan	nan	nan	nan	nan	nan	nan	nan	nan	nan	nan	nan	nan	nan	nan	nan	nan
A1CF	29974	symbol	H. sapiens	29974	H. sapiens	A1CF	APOBEC1 complementation factor	GO:0010609 mRNA localization resulting in post-transcriptional regulation of gene expression;GO:0008298 intracellular mRNA localization;GO:2000623 negative regulation of nuclear-transcribed mRNA catabolic process, nonsense-mediated decay		Predicted intracellular proteins	Nucleoplasm (Supported)				0.0	0.0	0.0	0.0	0.0	0.0	0.0	0.0	0.0	0.0	0.0	0.0	0.0	0.0	0.0	0.0	0.0	0.0	0.0	0.0
SIGLEC10	89790	symbol	H. sapiens	89790	H. sapiens	SIGLEC10	sialic acid binding Ig like lectin 10	GO:0106015 negative regulation of inflammatory response to wounding;GO:0106014 regulation of inflammatory response to wounding;GO:1903035 negative regulation of response to wounding		Predicted intracellular proteins	Cytosol (Supported); Additional: Actin filaments;Plasma membrane				0.0	1.0	0.0	0.0	0.0	0.0	0.0	1.0	0.0	0.0	0.0	1.0	0.0	0.0	0.0	0.0	0.0	0.0	0.0	0.0
CD3D	915	symbol	H. sapiens	915	H. sapiens	CD3D	CD3 delta subunit of T-cell receptor complex	GO:0045059 positive thymic T cell selection;GO:0045061 thymic T cell selection;GO:0043368 positive T cell selection		CD markers; Disease related genes; Human disease related genes:Immune system diseases:Primary immunodeficiency; Predicted intracellular proteins; FDA approved drug targets:Biotech drugs	Endoplasmic reticulum (Uncertain)	Muromonab; Blinatumomab	(M290)PID IL12 STAT4 PATHWAY; (M88)PID CD8 TCR PATHWAY; (M54)PID IL12 2PATHWAY	(M5950)HALLMARK ALLOGRAFT REJECTION	0.0	1.0	0.0	0.0	0.0	1.0	1.0	1.0	0.0	0.0	0.0	0.0	0.0	0.0	0.0	0.0	1.0	0.0	0.0	0.0
CD79B	974	symbol	H. sapiens	974	H. sapiens	CD79B	CD79b molecule	GO:0050853 B cell receptor signaling pathway;GO:0030183 B cell differentiation;GO:0042113 B cell activation		Cancer-related genes:Mutated cancer genes; Disease related genes; CD markers; Human disease related genes:Cancers:Cancers of haematopoietic and lymphoid tissues; Human disease related genes:Immune system diseases:Primary immunodeficiency; FDA approved drug targets:Biotech drugs	Plasma membrane (Supported); Additional: Cytosol;Nucleoplasm	Polatuzumab vedotin	(M10)PID BCR 5PATHWAY	(M5947)HALLMARK IL2 STAT5 SIGNALING	0.0	1.0	0.0	0.0	0.0	1.0	1.0	1.0	0.0	0.0	0.0	0.0	0.0	0.0	0.0	0.0	0.0	0.0	0.0	0.0
FCER1G	2207	symbol	H. sapiens	2207	H. sapiens	FCER1G	Fc epsilon receptor Ig	GO:0038156 interleukin-3-mediated signaling pathway;GO:0042590 antigen processing and presentation of exogenous peptide antigen via MHC class I;GO:0002283 neutrophil activation involved in immune response		FDA approved drug targets:Small molecule drugs		Benzylpenicilloyl polylysine	(M7)PID FCER1 PATHWAY	(M5921)HALLMARK COMPLEMENT; (M5953)HALLMARK KRAS SIGNALING UP	0.0	1.0	1.0	1.0	0.0	1.0	1.0	0.0	1.0	0.0	1.0	0.0	0.0	0.0	0.0	0.0	0.0	0.0	1.0	1.0
FAM167A	83648	symbol	H. sapiens	83648	H. sapiens	FAM167A	family with sequence similarity 167 member A			Predicted intracellular proteins	Mitochondria (Approved)				0.0	0.0	0.0	0.0	0.0	0.0	0.0	0.0	0.0	0.0	0.0	0.0	0.0	0.0	0.0	0.0	0.0	0.0	0.0	0.0
CLEC4E	26253	symbol	H. sapiens	26253	H. sapiens	CLEC4E	C-type lectin domain family 4 member E	GO:0061760 antifungal innate immune response;GO:0038094 Fc-gamma receptor signaling pathway;GO:0002292 T cell differentiation involved in immune response		Predicted intracellular proteins	Cytosol (Uncertain)	Cholesterol	(M5880)NABA ECM AFFILIATED; (M5885)NABA MATRISOME ASSOCIATED; (M5889)NABA MATRISOME		1.0	0.0	0.0	1.0	0.0	1.0	1.0	0.0	0.0	0.0	1.0	0.0	0.0	0.0	0.0	0.0	0.0	0.0	0.0	1.0
APOA2	336	symbol	H. sapiens	336	H. sapiens	APOA2	apolipoprotein A2	GO:0060695 negative regulation of cholesterol transporter activity;GO:0060621 negative regulation of cholesterol import;GO:0060694 regulation of cholesterol transporter activity		Predicted intracellular proteins; Predicted secreted proteins; Cancer-related genes:Candidate cancer biomarkers; Candidate cardiovascular disease genes		Zinc; Copper; Zinc acetate			0.0	0.0	1.0	0.0	0.0	0.0	0.0	0.0	1.0	0.0	1.0	0.0	0.0	1.0	0.0	0.0	0.0	0.0	0.0	0.0
PDZD3	79849	symbol	H. sapiens	79849	H. sapiens	PDZD3	PDZ domain containing 3	GO:0031283 negative regulation of guanylate cyclase activity;GO:0010754 negative regulation of cGMP-mediated signaling;GO:0030809 negative regulation of nucleotide biosynthetic process		Predicted intracellular proteins				(M5915)HALLMARK APICAL JUNCTION	0.0	0.0	0.0	0.0	0.0	0.0	0.0	0.0	0.0	0.0	0.0	0.0	0.0	0.0	0.0	0.0	0.0	0.0	0.0	0.0
IL2RA	3559	symbol	H. sapiens	3559	H. sapiens	IL2RA	interleukin 2 receptor subunit alpha	GO:0046013 regulation of T cell homeostatic proliferation;GO:0006924 activation-induced cell death of T cells;GO:0038110 interleukin-2-mediated signaling pathway		Human disease related genes:Endocrine and metabolic diseases:Diabetes; CD markers; Disease related genes; Human disease related genes:Immune system diseases:Primary immunodeficiency; Predicted intracellular proteins; Cancer-related genes:Candidate cancer biomarkers; FDA approved drug targets:Biotech drugs		Denileukin diftitox; Aldesleukin; Basiliximab; Daclizumab	(M235)PID TCR CALCIUM PATHWAY; (M234)PID IL2 STAT5 PATHWAY; (M290)PID IL12 STAT4 PATHWAY	(M5897)HALLMARK IL6 JAK STAT3 SIGNALING; (M5947)HALLMARK IL2 STAT5 SIGNALING; (M5950)HALLMARK ALLOGRAFT REJECTION	0.0	0.0	1.0	0.0	0.0	0.0	0.0	0.0	1.0	0.0	0.0	1.0	0.0	0.0	0.0	0.0	1.0	0.0	0.0	0.0
LINC00996	285972	symbol	H. sapiens	285972	H. sapiens	LINC00996	long intergenic non-protein coding RNA 996								0.0	0.0	0.0	0.0	0.0	0.0	0.0	0.0	0.0	0.0	0.0	0.0	0.0	0.0	0.0	0.0	0.0	0.0	0.0	0.0
SGK2	10110	symbol	H. sapiens	10110	H. sapiens	SGK2	serum/glucocorticoid regulated kinase 2	GO:0032411 positive regulation of transporter activity;GO:0018105 peptidyl-serine phosphorylation;GO:0018209 peptidyl-serine modification	AGC Ser/Thr protein kinase family	ENZYME proteins:Transferases; Predicted intracellular proteins; Enzymes; Kinases:AGC Ser/Thr protein kinases	Nucleoplasm (Supported)				0.0	0.0	0.0	0.0	0.0	0.0	0.0	0.0	0.0	0.0	0.0	0.0	0.0	0.0	0.0	0.0	0.0	0.0	0.0	0.0
CD180	4064	symbol	H. sapiens	4064	H. sapiens	CD180	CD180 molecule	GO:0002322 B cell proliferation involved in immune response;GO:0031666 positive regulation of lipopolysaccharide-mediated signaling pathway;GO:0031664 regulation of lipopolysaccharide-mediated signaling pathway		CD markers	Plasma membrane (Approved); Additional: Mitotic spindle;Nucleoli;Nucleoplasm				0.0	0.0	1.0	1.0	0.0	1.0	0.0	0.0	0.0	1.0	0.0	0.0	0.0	0.0	0.0	0.0	0.0	0.0	0.0	0.0
RP11-153M7.3						None	None	None	None	None	None	None	None	None	nan	nan	nan	nan	nan	nan	nan	nan	nan	nan	nan	nan	nan	nan	nan	nan	nan	nan	nan	nan
DAPL1	92196	symbol	H. sapiens	92196	H. sapiens	DAPL1	death associated protein like 1	GO:0034198 cellular response to amino acid starvation;GO:1990928 response to amino acid starvation;GO:0010507 negative regulation of autophagy		Predicted intracellular proteins	Microtubules;Nuclear bodies;Nucleoplasm (Approved)				0.0	0.0	0.0	0.0	0.0	0.0	0.0	0.0	0.0	0.0	0.0	0.0	0.0	0.0	0.0	0.0	0.0	0.0	0.0	0.0
SOSTDC1	25928	symbol	H. sapiens	25928	H. sapiens	SOSTDC1	sclerostin domain containing 1	GO:2000016 negative regulation of determination of dorsal identity;GO:0060648 mammary gland bud morphogenesis;GO:2000015 regulation of determination of dorsal identity		Predicted secreted proteins	Golgi apparatus (Uncertain); Additional: Nucleoli;Nucleoli rim;Vesicles		(M181)PID BMP PATHWAY		0.0	0.0	0.0	0.0	1.0	0.0	0.0	0.0	0.0	0.0	0.0	0.0	0.0	0.0	0.0	0.0	0.0	0.0	0.0	0.0
BARX1	56033	symbol	H. sapiens	56033	H. sapiens	BARX1	BARX homeobox 1	GO:0048536 spleen development;GO:0055123 digestive system development;GO:0030178 negative regulation of Wnt signaling pathway		Transcription factors:Helix-turn-helix domains; Predicted intracellular proteins	Nucleoplasm (Approved); Additional: Vesicles				0.0	0.0	0.0	0.0	1.0	1.0	0.0	0.0	0.0	0.0	0.0	0.0	0.0	0.0	0.0	0.0	0.0	0.0	0.0	0.0
RP11-68L18.1						None	None	None	None	None	None	None	None	None	nan	nan	nan	nan	nan	nan	nan	nan	nan	nan	nan	nan	nan	nan	nan	nan	nan	nan	nan	nan
RP11-497H16.7						None	None	None	None	None	None	None	None	None	nan	nan	nan	nan	nan	nan	nan	nan	nan	nan	nan	nan	nan	nan	nan	nan	nan	nan	nan	nan
CRLF1	9244	symbol	H. sapiens	9244	H. sapiens	CRLF1	cytokine receptor like factor 1	GO:2000672 negative regulation of motor neuron apoptotic process;GO:2000671 regulation of motor neuron apoptotic process;GO:0042531 positive regulation of tyrosine phosphorylation of STAT protein		Disease related genes; Predicted secreted proteins; Predicted intracellular proteins; Human disease related genes:Congenital malformations:Other congenital malformations			(M5883)NABA SECRETED FACTORS; (M5885)NABA MATRISOME ASSOCIATED; (M5889)NABA MATRISOME	(M5930)HALLMARK EPITHELIAL MESENCHYMAL TRANSITION	1.0	0.0	1.0	0.0	0.0	0.0	0.0	0.0	0.0	0.0	0.0	0.0	0.0	0.0	0.0	0.0	0.0	0.0	0.0	0.0
RP11-535M15.2						None	None	None	None	None	None	None	None	None	nan	nan	nan	nan	nan	nan	nan	nan	nan	nan	nan	nan	nan	nan	nan	nan	nan	nan	nan	nan
AK4	205	symbol	H. sapiens	205	H. sapiens	AK4	adenylate kinase 4	GO:0006172 ADP biosynthetic process;GO:0009180 purine ribonucleoside diphosphate biosynthetic process;GO:0009136 purine nucleoside diphosphate biosynthetic process		ENZYME proteins:Transferases; Predicted intracellular proteins; Enzymes	Mitochondria (Supported)			(M5891)HALLMARK HYPOXIA; (M5924)HALLMARK MTORC1 SIGNALING; (M5937)HALLMARK GLYCOLYSIS	0.0	0.0	0.0	0.0	0.0	0.0	0.0	0.0	0.0	0.0	0.0	0.0	0.0	0.0	0.0	0.0	0.0	0.0	0.0	0.0
NOS1	4842	symbol	H. sapiens	4842	H. sapiens	NOS1	nitric oxide synthase 1	GO:0098923 retrograde trans-synaptic signaling by soluble gas;GO:0098924 retrograde trans-synaptic signaling by nitric oxide;GO:0051581 negative regulation of neurotransmitter uptake		Enzymes; ENZYME proteins:Oxidoreductases; Cancer-related genes:Candidate cancer biomarkers; Predicted intracellular proteins; FDA approved drug targets:Small molecule drugs	Plasma membrane (Supported); Additional: Nucleoplasm	Citrulline; Donepezil; Ketamine; L-N(omega)-Nitroarginine-2,4-L-diaminobutyric amide; Formic acid; 3-Bromo-7-Nitroindazole; N-{(4S)-4-Amino-5-[(2-aminoethyl)amino]pentyl}-N'-nitroguanidine; N-[3-(aminomethyl)benzyl]acetamidine; L-N(omega)-nitroarginine-(4R)-amino-L-proline amide; 1-hydroxy-2-isopropylguanidine; N-omega-propyl-L-arginine; 2-butyl-1-hydroxyguanidine; S-Ethyl-N-[4-(Trifluoromethyl)P…		(M5951)HALLMARK SPERMATOGENESIS; (M5909)HALLMARK MYOGENESIS; (M5956)HALLMARK KRAS SIGNALING DN	0.0	0.0	0.0	1.0	0.0	0.0	0.0	0.0	0.0	0.0	0.0	0.0	0.0	0.0	0.0	0.0	0.0	0.0	0.0	0.0
LYVE1	10894	symbol	H. sapiens	10894	H. sapiens	LYVE1	lymphatic vessel endothelial hyaluronan receptor 1	GO:0002693 positive regulation of cellular extravasation;GO:0006027 glycosaminoglycan catabolic process;GO:0006026 aminoglycan catabolic process		Transporters					0.0	0.0	0.0	0.0	0.0	0.0	0.0	0.0	0.0	0.0	0.0	0.0	0.0	0.0	0.0	0.0	0.0	0.0	0.0	0.0
LCE3D	84648	symbol	H. sapiens	84648	H. sapiens	LCE3D	late cornified envelope 3D	GO:0031424 keratinization;GO:0030216 keratinocyte differentiation;GO:0009913 epidermal cell differentiation		Predicted intracellular proteins					0.0	0.0	0.0	0.0	1.0	0.0	0.0	0.0	0.0	0.0	0.0	0.0	0.0	0.0	0.0	0.0	0.0	0.0	0.0	0.0
MIR137HG	400765	symbol	H. sapiens	400765	H. sapiens	MIR137HG	MIR137 host gene	GO:0035195 miRNA-mediated gene silencing;GO:0035194 post-transcriptional gene silencing by RNA;GO:0016441 post-transcriptional gene silencing							0.0	0.0	0.0	0.0	0.0	0.0	0.0	0.0	0.0	0.0	0.0	0.0	0.0	0.0	0.0	0.0	0.0	0.0	0.0	0.0
ADAMTS3	9508	symbol	H. sapiens	9508	H. sapiens	ADAMTS3	ADAM metallopeptidase with thrombospondin type 1 motif 3	GO:0010573 vascular endothelial growth factor production;GO:1900748 positive regulation of vascular endothelial growth factor signaling pathway;GO:0032964 collagen biosynthetic process		Disease related genes; Predicted secreted proteins; Human disease related genes:Congenital malformations:Other congenital malformations; Cancer-related genes:Candidate cancer biomarkers	Intermediate filaments (Approved)		(M3468)NABA ECM REGULATORS; (M5885)NABA MATRISOME ASSOCIATED; (M5889)NABA MATRISOME		1.0	0.0	0.0	0.0	1.0	0.0	0.0	0.0	0.0	0.0	0.0	0.0	0.0	0.0	0.0	0.0	0.0	0.0	0.0	1.0
HDC	3067	symbol	H. sapiens	3067	H. sapiens	HDC	histidine decarboxylase	GO:0001694 histamine biosynthetic process;GO:0001692 histamine metabolic process;GO:0052803 imidazole-containing compound metabolic process		Human disease related genes:Other diseases:Mental and behavioural disorders; Predicted intracellular proteins; ENZYME proteins:Lyases; Enzymes	Nuclear bodies (Approved)	Pyridoxal phosphate; Histidine			0.0	0.0	0.0	0.0	0.0	0.0	0.0	0.0	0.0	0.0	0.0	0.0	0.0	0.0	0.0	0.0	0.0	0.0	0.0	0.0
EYA4	2070	symbol	H. sapiens	2070	H. sapiens	EYA4	EYA transcriptional coactivator and phosphatase 4	GO:0016576 histone dephosphorylation;GO:1901099 negative regulation of signal transduction in absence of ligand;GO:2001240 negative regulation of extrinsic apoptotic signaling pathway in absence of ligand		Predicted intracellular proteins; ENZYME proteins:Hydrolases; Human disease related genes:Nervous system diseases:Ear disease; Human disease related genes:Cardiovascular diseases:Cardiac diseases; Disease related genes; Potential drug targets; Enzymes	Nucleoplasm (Approved)				0.0	0.0	0.0	0.0	0.0	0.0	0.0	0.0	0.0	0.0	0.0	0.0	0.0	0.0	0.0	0.0	0.0	0.0	0.0	0.0
ADRA1D	146	symbol	H. sapiens	146	H. sapiens	ADRA1D	adrenoceptor alpha 1D	GO:0150099 neuron-glial cell signaling;GO:0001996 positive regulation of heart rate by epinephrine-norepinephrine;GO:0003321 positive regulation of blood pressure by epinephrine-norepinephrine		G-protein coupled receptors:GPCRs excl olfactory receptors; FDA approved drug targets:Small molecule drugs		Midodrine; Cabergoline; Dapiprazole; Amitriptyline; Alfuzosin; Norepinephrine; Phenylephrine; Prazosin; Imipramine; Nortriptyline; Clonidine; Doxazosin; Nicardipine; Verapamil; Epinephrine; Phentolamine; Ergotamine; Tamsulosin; Methoxamine; Fenoldopam; Quinidine; Phenoxybenzamine; Oxymetazoline; Carvedilol; Doxepin; Terazosin; Pergolide; Bromocriptine; Methotrimeprazine; Dronedarone; R450; Epicep…			0.0	0.0	0.0	0.0	0.0	0.0	0.0	0.0	0.0	0.0	0.0	0.0	1.0	0.0	0.0	0.0	0.0	0.0	0.0	0.0
CTD-2104P17.1						None	None	None	None	None	None	None	None	None	nan	nan	nan	nan	nan	nan	nan	nan	nan	nan	nan	nan	nan	nan	nan	nan	nan	nan	nan	nan
MS4A4A	51338	symbol	H. sapiens	51338	H. sapiens	MS4A4A	membrane spanning 4-domains A4A								0.0	0.0	0.0	0.0	0.0	0.0	0.0	0.0	0.0	0.0	0.0	0.0	0.0	0.0	0.0	0.0	0.0	0.0	0.0	0.0
ITGAL	3683	symbol	H. sapiens	3683	H. sapiens	ITGAL	integrin subunit alpha L	GO:0035683 memory T cell extravasation;GO:0002291 T cell activation via T cell receptor contact with antigen bound to MHC molecule on antigen presenting cell;GO:0072683 T cell extravasation		Transporters:Accessory Factors Involved in Transport; CD markers; Predicted intracellular proteins; FDA approved drug targets:Small molecule drugs; FDA approved drug targets:Biotech drugs		Efalizumab; Antithymocyte immunoglobulin (rabbit); Lovastatin; Simvastatin; Rosuvastatin; 1-Acetyl-4-(4-{4-[(2-Ethoxyphenyl)Thio]-3-Nitrophenyl}Pyridin-2-Yl)Piperazine; LFA703; (S)-2-((S)-3-isobutyl-2,5-dioxo-4-quinolin-3-ylmethyl-[1,4]diazepan-1yl)-N-methyl-3-naphtalen-2-yl-propionamide; 7A-[(4-cyanophenyl)methyl]-6-(3,5-dichlorophenyl)-5-oxo-2,3,5,7A-tetrahydro-1H-pyrrolo[1,2-A]pyrrole-7-carbon…	(M47)PID INTEGRIN CS PATHWAY; (M169)PID INTEGRIN2 PATHWAY; (M222)PID CXCR3 PATHWAY	(M5950)HALLMARK ALLOGRAFT REJECTION	0.0	0.0	1.0	0.0	0.0	1.0	0.0	1.0	0.0	0.0	0.0	0.0	0.0	0.0	0.0	0.0	0.0	1.0	0.0	0.0
LINC00173	100287569	symbol	H. sapiens	100287569	H. sapiens	LINC00173	long intergenic non-protein coding RNA 173								0.0	0.0	0.0	0.0	0.0	0.0	0.0	0.0	0.0	0.0	0.0	0.0	0.0	0.0	0.0	0.0	0.0	0.0	0.0	0.0
CYP4F2	8529	symbol	H. sapiens	8529	H. sapiens	CYP4F2	cytochrome P450 family 4 subfamily F member 2	GO:0032304 negative regulation of icosanoid secretion;GO:0003095 pressure natriuresis;GO:0042361 menaquinone catabolic process		Enzymes; Disease related genes; ENZYME proteins:Oxidoreductases; Potential drug targets; Predicted intracellular proteins				(M5934)HALLMARK XENOBIOTIC METABOLISM	0.0	0.0	0.0	0.0	0.0	0.0	0.0	0.0	0.0	0.0	0.0	0.0	0.0	0.0	0.0	0.0	0.0	0.0	0.0	0.0
RP11-1149M10.2						None	None	None	None	None	None	None	None	None	nan	nan	nan	nan	nan	nan	nan	nan	nan	nan	nan	nan	nan	nan	nan	nan	nan	nan	nan	nan
RP11-121A14.2						None	None	None	None	None	None	None	None	None	nan	nan	nan	nan	nan	nan	nan	nan	nan	nan	nan	nan	nan	nan	nan	nan	nan	nan	nan	nan
SLA2	84174	symbol	H. sapiens	84174	H. sapiens	SLA2	Src like adaptor 2	GO:0050849 negative regulation of calcium-mediated signaling;GO:0050860 negative regulation of T cell receptor signaling pathway;GO:0050858 negative regulation of antigen receptor-mediated signaling pathway		Predicted intracellular proteins	Golgi apparatus;Nucleoplasm;Vesicles (Approved)		(M34)PID TCR PATHWAY		0.0	1.0	1.0	0.0	0.0	1.0	1.0	0.0	1.0	0.0	0.0	0.0	0.0	0.0	0.0	0.0	0.0	0.0	1.0	0.0
AC006262.4						None	None	None	None	None	None	None	None	None	nan	nan	nan	nan	nan	nan	nan	nan	nan	nan	nan	nan	nan	nan	nan	nan	nan	nan	nan	nan
RP11-403A21.1						None	None	None	None	None	None	None	None	None	nan	nan	nan	nan	nan	nan	nan	nan	nan	nan	nan	nan	nan	nan	nan	nan	nan	nan	nan	nan
RP11-157G21.2						None	None	None	None	None	None	None	None	None	nan	nan	nan	nan	nan	nan	nan	nan	nan	nan	nan	nan	nan	nan	nan	nan	nan	nan	nan	nan
MAB21L2	10586	symbol	H. sapiens	10586	H. sapiens	MAB21L2	mab-21 like 2	GO:0010172 embryonic body morphogenesis;GO:0010171 body morphogenesis;GO:0043010 camera-type eye development		Disease related genes; Human disease related genes:Congenital malformations:Congenital malformations of eye; Predicted intracellular proteins	Nucleoplasm (Enhanced)				0.0	0.0	0.0	0.0	0.0	0.0	0.0	0.0	0.0	0.0	0.0	0.0	0.0	0.0	0.0	0.0	0.0	0.0	0.0	0.0
FABP3	2170	symbol	H. sapiens	2170	H. sapiens	FABP3	fatty acid binding protein 3	GO:0140214 positive regulation of long-chain fatty acid import into cell;GO:2001245 regulation of phosphatidylcholine biosynthetic process;GO:0140212 regulation of long-chain fatty acid import into cell		Predicted intracellular proteins; Candidate cardiovascular disease genes	Focal adhesion sites (Uncertain); Additional: Golgi apparatus;Plasma membrane			(M5909)HALLMARK MYOGENESIS	0.0	0.0	0.0	0.0	0.0	0.0	0.0	0.0	1.0	0.0	0.0	0.0	0.0	0.0	0.0	0.0	0.0	0.0	0.0	0.0
SPRR1B	6699	symbol	H. sapiens	6699	H. sapiens	SPRR1B	small proline rich protein 1B	GO:0018149 peptide cross-linking;GO:0031424 keratinization;GO:0030216 keratinocyte differentiation		Predicted intracellular proteins; Cancer-related genes:Candidate cancer biomarkers					0.0	0.0	0.0	0.0	1.0	0.0	0.0	0.0	0.0	0.0	0.0	0.0	0.0	0.0	0.0	0.0	0.0	0.0	0.0	0.0
CXCL13	10563	symbol	H. sapiens	10563	H. sapiens	CXCL13	C-X-C motif chemokine ligand 13	GO:0002518 lymphocyte chemotaxis across high endothelial venule;GO:0035766 cell chemotaxis to fibroblast growth factor;GO:0035768 endothelial cell chemotaxis to fibroblast growth factor		Predicted secreted proteins; Cancer-related genes:Candidate cancer biomarkers			(M222)PID CXCR3 PATHWAY; (M5883)NABA SECRETED FACTORS; (M5885)NABA MATRISOME ASSOCIATED	(M5897)HALLMARK IL6 JAK STAT3 SIGNALING; (M5950)HALLMARK ALLOGRAFT REJECTION	1.0	1.0	1.0	1.0	0.0	0.0	0.0	0.0	1.0	1.0	0.0	1.0	1.0	0.0	1.0	0.0	0.0	0.0	1.0	0.0
DLX6-AS1	285987	symbol	H. sapiens	285987	H. sapiens	DLX6-AS1	DLX6 antisense RNA 1								0.0	0.0	0.0	0.0	0.0	0.0	0.0	0.0	0.0	0.0	0.0	0.0	0.0	0.0	0.0	0.0	0.0	0.0	0.0	0.0
AC005481.5						None	None	None	None	None	None	None	None	None	nan	nan	nan	nan	nan	nan	nan	nan	nan	nan	nan	nan	nan	nan	nan	nan	nan	nan	nan	nan
IDO2	169355	symbol	H. sapiens	169355	H. sapiens	IDO2	indoleamine 2,3-dioxygenase 2	GO:0019441 tryptophan catabolic process to kynurenine;GO:0034354 'de novo' NAD biosynthetic process from tryptophan;GO:0034627 'de novo' NAD biosynthetic process		Predicted intracellular proteins	Cytosol (Approved)				0.0	0.0	0.0	0.0	0.0	0.0	0.0	0.0	0.0	0.0	0.0	0.0	0.0	0.0	0.0	0.0	0.0	0.0	0.0	0.0
LCE3E	353145	symbol	H. sapiens	353145	H. sapiens	LCE3E	late cornified envelope 3E	GO:0031424 keratinization;GO:0030216 keratinocyte differentiation;GO:0009913 epidermal cell differentiation		Predicted intracellular proteins					0.0	0.0	0.0	0.0	1.0	0.0	0.0	0.0	0.0	0.0	0.0	0.0	0.0	0.0	0.0	0.0	0.0	0.0	0.0	0.0
ANKRD29	147463	symbol	H. sapiens	147463	H. sapiens	ANKRD29	ankyrin repeat domain 29			Predicted intracellular proteins	Nuclear bodies;Nucleoplasm (Approved)				0.0	0.0	0.0	0.0	0.0	0.0	0.0	0.0	0.0	0.0	0.0	0.0	0.0	0.0	0.0	0.0	0.0	0.0	0.0	0.0
LGALS9B	284194	symbol	H. sapiens	284194	H. sapiens	LGALS9B	galectin 9B	GO:2000562 negative regulation of CD4-positive, alpha-beta T cell proliferation;GO:2000561 regulation of CD4-positive, alpha-beta T cell proliferation;GO:0046642 negative regulation of alpha-beta T cell proliferation		Predicted intracellular proteins	Cytosol (Uncertain)		(M5880)NABA ECM AFFILIATED; (M5885)NABA MATRISOME ASSOCIATED; (M5889)NABA MATRISOME		1.0	0.0	0.0	0.0	0.0	0.0	0.0	0.0	1.0	0.0	0.0	0.0	0.0	0.0	0.0	0.0	0.0	0.0	0.0	1.0
CD1A	909	symbol	H. sapiens	909	H. sapiens	CD1A	CD1a molecule	GO:0048006 antigen processing and presentation, endogenous lipid antigen via MHC class Ib;GO:0048003 antigen processing and presentation of lipid antigen via MHC class Ib;GO:0048007 antigen processing and presentation, exogenous lipid antigen via MHC class Ib		CD markers		Antithymocyte immunoglobulin (rabbit)			0.0	1.0	0.0	0.0	0.0	0.0	1.0	1.0	0.0	1.0	0.0	0.0	0.0	1.0	0.0	0.0	1.0	0.0	0.0	0.0
SUSD5	26032	symbol	H. sapiens	26032	H. sapiens	SUSD5	sushi domain containing 5	GO:0007219 Notch signaling pathway;GO:0007155 cell adhesion;GO:0007166 cell surface receptor signaling pathway		Predicted intracellular proteins	Golgi apparatus;Vesicles (Uncertain)				0.0	0.0	0.0	0.0	0.0	0.0	0.0	0.0	0.0	0.0	0.0	0.0	0.0	0.0	0.0	0.0	0.0	0.0	0.0	0.0
LAIR2	3904	symbol	H. sapiens	3904	H. sapiens	LAIR2	leukocyte associated immunoglobulin like receptor 2			Predicted intracellular proteins; Predicted secreted proteins; CD markers					0.0	0.0	0.0	0.0	0.0	0.0	0.0	1.0	0.0	0.0	0.0	0.0	0.0	0.0	0.0	0.0	0.0	0.0	0.0	0.0
KRTDAP	388533	symbol	H. sapiens	388533	H. sapiens	KRTDAP	keratinocyte differentiation associated protein	GO:0008544 epidermis development;GO:0009888 tissue development;GO:0030154 cell differentiation		Predicted secreted proteins					0.0	0.0	0.0	0.0	1.0	0.0	0.0	0.0	0.0	0.0	0.0	0.0	0.0	0.0	0.0	0.0	0.0	0.0	0.0	0.0
LINC00426	100188949	symbol	H. sapiens	100188949	H. sapiens	LINC00426	long intergenic non-protein coding RNA 426								0.0	0.0	0.0	0.0	0.0	0.0	0.0	0.0	0.0	0.0	0.0	0.0	0.0	0.0	0.0	0.0	0.0	0.0	0.0	0.0
NUDT11	55190	symbol	H. sapiens	55190	H. sapiens	NUDT11	nudix hydrolase 11	GO:0071543 diphosphoinositol polyphosphate metabolic process;GO:1901906 diadenosine pentaphosphate metabolic process;GO:1901907 diadenosine pentaphosphate catabolic process		Predicted intracellular proteins; Enzymes; ENZYME proteins:Hydrolases	Cytosol (Approved)			(M5956)HALLMARK KRAS SIGNALING DN	0.0	0.0	0.0	0.0	0.0	0.0	0.0	0.0	0.0	0.0	0.0	0.0	0.0	0.0	0.0	0.0	0.0	0.0	0.0	0.0
PKDCC	91461	symbol	H. sapiens	91461	H. sapiens	PKDCC	protein kinase domain containing, cytoplasmic	GO:0042997 negative regulation of Golgi to plasma membrane protein transport;GO:0042996 regulation of Golgi to plasma membrane protein transport;GO:0032332 positive regulation of chondrocyte differentiation	Other	ENZYME proteins:Transferases; Kinases; Predicted secreted proteins; Disease related genes; Potential drug targets; Enzymes					0.0	0.0	0.0	0.0	0.0	0.0	0.0	0.0	0.0	0.0	0.0	0.0	0.0	0.0	0.0	0.0	0.0	0.0	0.0	0.0
ZNF737	100129842	symbol	H. sapiens	100129842	H. sapiens	ZNF737	zinc finger protein 737	GO:0006357 regulation of transcription by RNA polymerase II;GO:0006355 regulation of transcription, DNA-templated;GO:1903506 regulation of nucleic acid-templated transcription		Transcription factors:Zinc-coordinating DNA-binding domains; Predicted intracellular proteins					0.0	0.0	0.0	0.0	0.0	0.0	0.0	0.0	0.0	0.0	0.0	0.0	0.0	0.0	0.0	0.0	0.0	0.0	0.0	0.0
RP11-598F7.4						None	None	None	None	None	None	None	None	None	nan	nan	nan	nan	nan	nan	nan	nan	nan	nan	nan	nan	nan	nan	nan	nan	nan	nan	nan	nan
LINC00944	387895	symbol	H. sapiens	387895	H. sapiens	LINC00944	long intergenic non-protein coding RNA 944								0.0	0.0	0.0	0.0	0.0	0.0	0.0	0.0	0.0	0.0	0.0	0.0	0.0	0.0	0.0	0.0	0.0	0.0	0.0	0.0
PAGE5	90737	symbol	H. sapiens	90737	H. sapiens	PAGE5	PAGE family member 5			Predicted intracellular proteins	Mitochondria (Approved)				0.0	0.0	0.0	0.0	0.0	0.0	0.0	0.0	0.0	0.0	0.0	0.0	0.0	0.0	0.0	0.0	0.0	0.0	0.0	0.0
RP11-337N6.1						None	None	None	None	None	None	None	None	None	nan	nan	nan	nan	nan	nan	nan	nan	nan	nan	nan	nan	nan	nan	nan	nan	nan	nan	nan	nan
ZNF350-AS1	101669766	symbol	H. sapiens	101669766	H. sapiens	ZNF350-AS1	ZNF350 antisense RNA 1								0.0	0.0	0.0	0.0	0.0	0.0	0.0	0.0	0.0	0.0	0.0	0.0	0.0	0.0	0.0	0.0	0.0	0.0	0.0	0.0
GZMH	2999	symbol	H. sapiens	2999	H. sapiens	GZMH	granzyme H	GO:0019835 cytolysis;GO:0006915 apoptotic process;GO:0012501 programmed cell death		Predicted secreted proteins; Peptidases:Serine-type peptidases; Enzymes					0.0	0.0	0.0	0.0	0.0	0.0	0.0	0.0	0.0	0.0	0.0	0.0	0.0	0.0	0.0	0.0	0.0	0.0	0.0	0.0
CYP2B7P	1556	symbol	H. sapiens	1556	H. sapiens	CYP2B7P	cytochrome P450 family 2 subfamily B member 7, pseudogene								0.0	0.0	0.0	0.0	0.0	0.0	0.0	0.0	0.0	0.0	0.0	0.0	0.0	0.0	0.0	0.0	0.0	0.0	0.0	0.0
FCGBP	8857	symbol	H. sapiens	8857	H. sapiens	FCGBP	Fc gamma binding protein			Predicted intracellular proteins; Predicted secreted proteins	Plasma membrane (Approved); Additional: Cytokinetic bridge;Golgi apparatus				0.0	0.0	0.0	0.0	0.0	0.0	0.0	0.0	0.0	0.0	0.0	0.0	0.0	0.0	0.0	0.0	0.0	0.0	0.0	0.0
HK3	3101	symbol	H. sapiens	3101	H. sapiens	HK3	hexokinase 3	GO:0006735 NADH regeneration;GO:0061621 canonical glycolysis;GO:0061718 glucose catabolic process to pyruvate		ENZYME proteins:Transferases; Predicted intracellular proteins; Enzymes					0.0	0.0	0.0	0.0	0.0	0.0	0.0	0.0	0.0	0.0	0.0	0.0	0.0	0.0	0.0	0.0	0.0	0.0	0.0	0.0
VENTX	27287	symbol	H. sapiens	27287	H. sapiens	VENTX	VENT homeobox	GO:0045944 positive regulation of transcription by RNA polymerase II;GO:0045893 positive regulation of transcription, DNA-templated;GO:1903508 positive regulation of nucleic acid-templated transcription		Transcription factors:Helix-turn-helix domains; Predicted intracellular proteins	Nucleoli fibrillar center (Uncertain); Additional: Cytosol				0.0	0.0	0.0	0.0	0.0	0.0	0.0	0.0	0.0	0.0	0.0	0.0	0.0	0.0	0.0	0.0	0.0	0.0	0.0	0.0
ITGB2	3689	symbol	H. sapiens	3689	H. sapiens	ITGB2	integrin subunit beta 2	GO:0045914 negative regulation of catecholamine metabolic process;GO:0045963 negative regulation of dopamine metabolic process;GO:2000361 regulation of prostaglandin-E synthase activity		Disease related genes; Human disease related genes:Immune system diseases:Primary immunodeficiency; Predicted intracellular proteins; CD markers	Plasma membrane (Supported); Additional: Rods & Rings		(M47)PID INTEGRIN CS PATHWAY; (M169)PID INTEGRIN2 PATHWAY; (M159)PID AMB2 NEUTROPHILS PATHWAY	(M5924)HALLMARK MTORC1 SIGNALING; (M5950)HALLMARK ALLOGRAFT REJECTION; (M5953)HALLMARK KRAS SIGNALING UP	0.0	0.0	1.0	0.0	0.0	1.0	1.0	1.0	1.0	1.0	0.0	0.0	0.0	1.0	0.0	1.0	0.0	1.0	1.0	0.0
HKDC1	80201	symbol	H. sapiens	80201	H. sapiens	HKDC1	hexokinase domain containing 1	GO:0051156 glucose 6-phosphate metabolic process;GO:0046835 carbohydrate phosphorylation;GO:0006096 glycolytic process		ENZYME proteins:Transferases; Predicted intracellular proteins; Enzymes	Mitochondria (Enhanced)			(M5953)HALLMARK KRAS SIGNALING UP	0.0	0.0	0.0	0.0	0.0	0.0	0.0	0.0	0.0	0.0	0.0	0.0	0.0	0.0	0.0	0.0	0.0	0.0	0.0	0.0
F13A1	2162	symbol	H. sapiens	2162	H. sapiens	F13A1	coagulation factor XIII A chain	GO:0072378 blood coagulation, fibrin clot formation;GO:0072376 protein activation cascade;GO:0018149 peptide cross-linking		Predicted intracellular proteins; ENZYME proteins:Transferases; Predicted secreted proteins; Candidate cardiovascular disease genes; Disease related genes; Human disease related genes:Cardiovascular diseases:Hematologic diseases; Enzymes; Cancer-related genes:Candidate cancer biomarkers; FDA approved drug targets:Biotech drugs		N-Acetyl-Serine; Thrombin; Prothrombin; Human thrombin; Anti-inhibitor coagulant complex	(M118)PID INTEGRIN A9B1 PATHWAY; (M18)PID INTEGRIN1 PATHWAY; (M3468)NABA ECM REGULATORS	(M5953)HALLMARK KRAS SIGNALING UP	1.0	0.0	1.0	0.0	0.0	0.0	0.0	0.0	0.0	0.0	0.0	0.0	0.0	0.0	0.0	0.0	0.0	0.0	1.0	0.0
USP30-AS1	100131733	symbol	H. sapiens	100131733	H. sapiens	USP30-AS1	USP30 antisense RNA 1								0.0	0.0	0.0	0.0	0.0	0.0	0.0	0.0	0.0	0.0	0.0	0.0	0.0	0.0	0.0	0.0	0.0	0.0	0.0	0.0
IL24	11009	symbol	H. sapiens	11009	H. sapiens	IL24	interleukin 24	GO:0042501 serine phosphorylation of STAT protein;GO:0071353 cellular response to interleukin-4;GO:0070670 response to interleukin-4		Predicted intracellular proteins; Predicted secreted proteins; Cancer-related genes:Candidate cancer biomarkers			(M196)PID IL23 PATHWAY; (M5883)NABA SECRETED FACTORS; (M5885)NABA MATRISOME ASSOCIATED		1.0	0.0	1.0	1.0	0.0	0.0	0.0	0.0	1.0	0.0	0.0	0.0	0.0	0.0	0.0	0.0	0.0	0.0	0.0	0.0
CLDN6	9074	symbol	H. sapiens	9074	H. sapiens	CLDN6	claudin 6	GO:0016338 calcium-independent cell-cell adhesion via plasma membrane cell-adhesion molecules;GO:0070830 bicellular tight junction assembly;GO:0120192 tight junction assembly		Predicted intracellular proteins				(M5915)HALLMARK APICAL JUNCTION	0.0	0.0	0.0	0.0	0.0	0.0	0.0	0.0	0.0	0.0	0.0	0.0	0.0	0.0	0.0	0.0	0.0	1.0	0.0	0.0
RP11-21L23.4						None	None	None	None	None	None	None	None	None	nan	nan	nan	nan	nan	nan	nan	nan	nan	nan	nan	nan	nan	nan	nan	nan	nan	nan	nan	nan
RP5-1091N2.9						None	None	None	None	None	None	None	None	None	nan	nan	nan	nan	nan	nan	nan	nan	nan	nan	nan	nan	nan	nan	nan	nan	nan	nan	nan	nan
CR1L	1379	symbol	H. sapiens	1379	H. sapiens	CR1L	complement C3b/C4b receptor 1 like	GO:0045959 negative regulation of complement activation, classical pathway;GO:1903659 regulation of complement-dependent cytotoxicity;GO:0030450 regulation of complement activation, classical pathway		Predicted secreted proteins					0.0	0.0	0.0	0.0	0.0	0.0	0.0	0.0	1.0	1.0	0.0	0.0	0.0	1.0	0.0	0.0	1.0	0.0	1.0	0.0
RP11-677M24.1						None	None	None	None	None	None	None	None	None	nan	nan	nan	nan	nan	nan	nan	nan	nan	nan	nan	nan	nan	nan	nan	nan	nan	nan	nan	nan
PRMT8	56341	symbol	H. sapiens	56341	H. sapiens	PRMT8	protein arginine methyltransferase 8	GO:0019919 peptidyl-arginine methylation, to asymmetrical-dimethyl arginine;GO:0035247 peptidyl-arginine omega-N-methylation;GO:0035246 peptidyl-arginine N-methylation		ENZYME proteins:Transferases; Predicted intracellular proteins; Enzymes					0.0	0.0	0.0	0.0	0.0	0.0	0.0	0.0	0.0	0.0	0.0	0.0	0.0	0.0	0.0	0.0	0.0	0.0	0.0	0.0
AKR1C1	1645	symbol	H. sapiens	1645	H. sapiens	AKR1C1	aldo-keto reductase family 1 member C1	GO:0009753 response to jasmonic acid;GO:0071395 cellular response to jasmonic acid stimulus;GO:0044597 daunorubicin metabolic process		ENZYME proteins:Oxidoreductases; Predicted intracellular proteins; Enzymes	Cytosol;Endoplasmic reticulum (Enhanced)	NADH; Salicylic acid; Acetylsalicylic acid; Nicotinamide adenine dinucleotide phosphate; Naringenin; 2-HYDROXY-3,5-DIIODOBENZOIC ACID; Epitestosterone; Hexestrol			0.0	0.0	0.0	1.0	1.0	0.0	0.0	0.0	0.0	0.0	0.0	0.0	0.0	0.0	0.0	0.0	0.0	0.0	0.0	0.0
C20orf197	284756	gene_synonym	H. sapiens	284756	H. sapiens	LINC02910	long intergenic non-protein coding RNA 2910								0.0	0.0	0.0	0.0	0.0	0.0	0.0	0.0	0.0	0.0	0.0	0.0	0.0	0.0	0.0	0.0	0.0	0.0	0.0	0.0
LY9	4063	symbol	H. sapiens	4063	H. sapiens	LY9	lymphocyte antigen 9	GO:0072540 T-helper 17 cell lineage commitment;GO:0072539 T-helper 17 cell differentiation;GO:0002295 T-helper cell lineage commitment		Predicted intracellular proteins; CD markers	Plasma membrane (Approved); Additional: Centriolar satellite				0.0	1.0	0.0	0.0	0.0	1.0	0.0	0.0	0.0	0.0	1.0	0.0	0.0	0.0	0.0	0.0	0.0	0.0	1.0	0.0
GHRH	2691	symbol	H. sapiens	2691	H. sapiens	GHRH	growth hormone releasing hormone	GO:0046005 positive regulation of circadian sleep/wake cycle, REM sleep;GO:0042320 regulation of circadian sleep/wake cycle, REM sleep;GO:0045938 positive regulation of circadian sleep/wake cycle, sleep		Predicted secreted proteins; Human disease related genes:Endocrine and metabolic diseases:Hypothalamus and pituitary gland diseases					0.0	0.0	0.0	0.0	0.0	0.0	0.0	0.0	0.0	0.0	0.0	0.0	1.0	0.0	0.0	0.0	0.0	0.0	0.0	0.0
PCDHGC5	56097	symbol	H. sapiens	56097	H. sapiens	PCDHGC5	protocadherin gamma subfamily C, 5	GO:0043524 negative regulation of neuron apoptotic process;GO:0007156 homophilic cell adhesion via plasma membrane adhesion molecules;GO:0043523 regulation of neuron apoptotic process			Plasma membrane;Vesicles (Approved); Additional: Cytosol;Nucleoplasm				0.0	0.0	0.0	0.0	0.0	0.0	0.0	0.0	0.0	0.0	0.0	0.0	0.0	0.0	0.0	0.0	0.0	1.0	0.0	0.0
SERPINB7	8710	symbol	H. sapiens	8710	H. sapiens	SERPINB7	serpin family B member 7	GO:0090362 positive regulation of platelet-derived growth factor production;GO:0090361 regulation of platelet-derived growth factor production;GO:0072126 positive regulation of glomerular mesangial cell proliferation		Disease related genes; Human disease related genes:Congenital malformations:Congenital malformations of skin; Predicted intracellular proteins	Endoplasmic reticulum (Approved); Additional: Mitochondria		(M3468)NABA ECM REGULATORS; (M5885)NABA MATRISOME ASSOCIATED; (M5889)NABA MATRISOME		1.0	0.0	0.0	0.0	0.0	0.0	0.0	0.0	0.0	0.0	1.0	0.0	0.0	0.0	0.0	0.0	0.0	0.0	0.0	0.0
AC104654.2						None	None	None	None	None	None	None	None	None	nan	nan	nan	nan	nan	nan	nan	nan	nan	nan	nan	nan	nan	nan	nan	nan	nan	nan	nan	nan
BRINP3	339479	symbol	H. sapiens	339479	H. sapiens	BRINP3	BMP/retinoic acid inducible neural specific 3	GO:0071300 cellular response to retinoic acid;GO:0045666 positive regulation of neuron differentiation;GO:0032526 response to retinoic acid		Predicted intracellular proteins; Predicted secreted proteins			(M5883)NABA SECRETED FACTORS; (M5885)NABA MATRISOME ASSOCIATED; (M5889)NABA MATRISOME		1.0	0.0	0.0	1.0	0.0	0.0	0.0	0.0	0.0	0.0	0.0	0.0	0.0	0.0	0.0	0.0	0.0	0.0	0.0	0.0
TREML2	79865	symbol	H. sapiens	79865	H. sapiens	TREML2	triggering receptor expressed on myeloid cells like 2	GO:0042110 T cell activation;GO:0046649 lymphocyte activation;GO:0045321 leukocyte activation							0.0	0.0	0.0	0.0	0.0	1.0	0.0	1.0	0.0	0.0	0.0	0.0	0.0	0.0	0.0	0.0	0.0	0.0	0.0	0.0
CHRM3-AS2	100506915	symbol	H. sapiens	100506915	H. sapiens	CHRM3-AS2	CHRM3 antisense RNA 2								0.0	0.0	0.0	0.0	0.0	0.0	0.0	0.0	0.0	0.0	0.0	0.0	0.0	0.0	0.0	0.0	0.0	0.0	0.0	0.0
HRK	8739	symbol	H. sapiens	8739	H. sapiens	HRK	harakiri, BCL2 interacting protein	GO:0090200 positive regulation of release of cytochrome c from mitochondria;GO:0090199 regulation of release of cytochrome c from mitochondria;GO:0010822 positive regulation of mitochondrion organization		Predicted intracellular proteins			(M166)PID ATF2 PATHWAY		0.0	0.0	0.0	0.0	0.0	0.0	0.0	0.0	0.0	0.0	0.0	0.0	0.0	0.0	0.0	0.0	0.0	0.0	0.0	0.0
SPHK1	8877	symbol	H. sapiens	8877	H. sapiens	SPHK1	sphingosine kinase 1	GO:0046521 sphingoid catabolic process;GO:1905364 regulation of endosomal vesicle fusion;GO:1900060 negative regulation of ceramide biosynthetic process		ENZYME proteins:Transferases; Predicted intracellular proteins; Enzymes	Cytosol;Plasma membrane (Supported)		(M103)PID S1P S1P1 PATHWAY; (M155)PID S1P META PATHWAY; (M53)PID INTEGRIN3 PATHWAY	(M5890)HALLMARK TNFA SIGNALING VIA NFKB; (M5909)HALLMARK MYOGENESIS; (M5932)HALLMARK INFLAMMATORY RESPONSE	0.0	0.0	1.0	0.0	0.0	0.0	0.0	0.0	1.0	0.0	1.0	1.0	0.0	0.0	0.0	0.0	0.0	0.0	0.0	0.0
ITLN2	142683	symbol	H. sapiens	142683	H. sapiens	ITLN2	intelectin 2			Predicted secreted proteins			(M5880)NABA ECM AFFILIATED; (M5885)NABA MATRISOME ASSOCIATED; (M5889)NABA MATRISOME		1.0	0.0	0.0	0.0	0.0	0.0	0.0	0.0	0.0	0.0	0.0	0.0	0.0	0.0	0.0	0.0	0.0	0.0	0.0	1.0
LINC00707	100507127	symbol	H. sapiens	100507127	H. sapiens	LINC00707	long intergenic non-protein coding RNA 707								0.0	0.0	0.0	0.0	0.0	0.0	0.0	0.0	0.0	0.0	0.0	0.0	0.0	0.0	0.0	0.0	0.0	0.0	0.0	0.0
AFF3	3899	symbol	H. sapiens	3899	H. sapiens	AFF3	AF4/FMR2 family member 3	GO:0035116 embryonic hindlimb morphogenesis;GO:0035137 hindlimb morphogenesis;GO:0030326 embryonic limb morphogenesis		Cancer-related genes; Predicted intracellular proteins	Nucleoplasm (Supported); Additional: Cytosol				0.0	0.0	1.0	0.0	0.0	0.0	0.0	0.0	0.0	0.0	0.0	0.0	0.0	0.0	0.0	0.0	0.0	0.0	0.0	0.0
RP11-603B24.1						None	None	None	None	None	None	None	None	None	nan	nan	nan	nan	nan	nan	nan	nan	nan	nan	nan	nan	nan	nan	nan	nan	nan	nan	nan	nan
CLDN14	23562	symbol	H. sapiens	23562	H. sapiens	CLDN14	claudin 14	GO:0016338 calcium-independent cell-cell adhesion via plasma membrane cell-adhesion molecules;GO:0070830 bicellular tight junction assembly;GO:0120192 tight junction assembly		Disease related genes; Human disease related genes:Nervous system diseases:Ear disease	Vesicles (Uncertain)			(M5915)HALLMARK APICAL JUNCTION	0.0	0.0	0.0	0.0	0.0	0.0	0.0	0.0	0.0	0.0	0.0	0.0	0.0	0.0	0.0	0.0	0.0	1.0	0.0	0.0
MT1X	4501	symbol	H. sapiens	4501	H. sapiens	MT1X	metallothionein 1X	GO:0036018 cellular response to erythropoietin;GO:0036017 response to erythropoietin;GO:0010273 detoxification of copper ion		Predicted intracellular proteins					0.0	0.0	1.0	0.0	0.0	0.0	0.0	0.0	0.0	0.0	0.0	0.0	0.0	0.0	0.0	0.0	0.0	0.0	0.0	0.0
FBXO39	162517	symbol	H. sapiens	162517	H. sapiens	FBXO39	F-box protein 39	GO:0031146 SCF-dependent proteasomal ubiquitin-dependent protein catabolic process;GO:0043161 proteasome-mediated ubiquitin-dependent protein catabolic process;GO:0010498 proteasomal protein catabolic process		Predicted intracellular proteins					0.0	0.0	0.0	0.0	0.0	0.0	0.0	0.0	0.0	0.0	0.0	0.0	0.0	0.0	0.0	0.0	0.0	0.0	0.0	0.0
SEMA3A	10371	symbol	H. sapiens	10371	H. sapiens	SEMA3A	semaphorin 3A	GO:1903045 neural crest cell migration involved in sympathetic nervous system development;GO:1903375 facioacoustic ganglion development;GO:0150018 basal dendrite development		Disease related genes; Predicted intracellular proteins; Predicted secreted proteins; Human disease related genes:Endocrine and metabolic diseases:Hypothalamus and pituitary gland diseases	Vesicles (Approved); Additional: Nucleoplasm		(M5880)NABA ECM AFFILIATED; (M5885)NABA MATRISOME ASSOCIATED; (M5889)NABA MATRISOME		1.0	0.0	1.0	0.0	0.0	0.0	0.0	0.0	0.0	0.0	0.0	1.0	0.0	0.0	0.0	0.0	0.0	0.0	0.0	1.0
RP11-324L17.1						None	None	None	None	None	None	None	None	None	nan	nan	nan	nan	nan	nan	nan	nan	nan	nan	nan	nan	nan	nan	nan	nan	nan	nan	nan	nan
PHYHIP	9796	symbol	H. sapiens	9796	H. sapiens	PHYHIP	phytanoyl-CoA 2-hydroxylase interacting protein	GO:0008104 protein localization;GO:0033036 macromolecule localization;GO:0051179 localization		Predicted intracellular proteins	Mitochondria (Supported); Additional: Nucleoplasm				0.0	0.0	0.0	0.0	0.0	0.0	0.0	0.0	0.0	0.0	0.0	0.0	0.0	0.0	0.0	0.0	0.0	0.0	0.0	0.0
JPH3	57338	symbol	H. sapiens	57338	H. sapiens	JPH3	junctophilin 3	GO:0060402 calcium ion transport into cytosol;GO:0060314 regulation of ryanodine-sensitive calcium-release channel activity;GO:0035640 exploration behavior		Disease related genes; Human disease related genes:Nervous system diseases:Neurodegenerative diseases; Transporters:Accessory Factors Involved in Transport; Potential drug targets	Nucleoplasm (Approved); Additional: Cytosol				0.0	0.0	0.0	0.0	0.0	0.0	0.0	0.0	0.0	0.0	0.0	0.0	1.0	0.0	0.0	0.0	0.0	0.0	0.0	0.0
RP11-673E1.3						None	None	None	None	None	None	None	None	None	nan	nan	nan	nan	nan	nan	nan	nan	nan	nan	nan	nan	nan	nan	nan	nan	nan	nan	nan	nan
CA2	760	symbol	H. sapiens	760	H. sapiens	CA2	carbonic anhydrase 2	GO:0090088 regulation of oligopeptide transport;GO:0090089 regulation of dipeptide transport;GO:2000878 positive regulation of oligopeptide transport		Predicted intracellular proteins; Human disease related genes:Congenital malformations:Congenital malformations of the musculoskeletal system; ENZYME proteins:Lyases; Disease related genes; Human disease related genes:Urinary system diseases:Kidney diseases; Enzymes; FDA approved drug targets:Small molecule drugs		Methyclothiazide; Topiramate; Ethoxzolamide; Sulpiride; Bendroflumethiazide; Celecoxib; Benzthiazide; Valdecoxib; Cyclothiazide; Furosemide; Methazolamide; Hydroflumethiazide; Acetazolamide; Dorzolamide; Chlorothiazide; Zonisamide; Trichlormethiazide; Ethinamate; Diazoxide; Diclofenamide; Brinzolamide; Quinethazone; p-Hydroxymercuribenzoic acid; N-Benzyl-4-Sulfamoyl-Benzamide; 4-Flourobenzenesulf…		(M5935)HALLMARK FATTY ACID METABOLISM; (M5941)HALLMARK UV RESPONSE UP; (M5947)HALLMARK IL2 STAT5 SIGNALING	0.0	0.0	0.0	0.0	0.0	0.0	0.0	0.0	0.0	0.0	0.0	0.0	0.0	0.0	0.0	0.0	0.0	0.0	0.0	0.0
MEI4	101928601	symbol	H. sapiens	101928601	H. sapiens	MEI4	meiotic double-stranded break formation protein 4	GO:0042138 meiotic DNA double-strand break formation;GO:0007129 homologous chromosome pairing at meiosis;GO:0045143 homologous chromosome segregation		Predicted intracellular proteins					0.0	0.0	0.0	0.0	0.0	0.0	0.0	0.0	0.0	0.0	0.0	0.0	0.0	0.0	0.0	0.0	0.0	0.0	0.0	0.0
RP11-60A14.1						None	None	None	None	None	None	None	None	None	nan	nan	nan	nan	nan	nan	nan	nan	nan	nan	nan	nan	nan	nan	nan	nan	nan	nan	nan	nan
LAMA3	3909	symbol	H. sapiens	3909	H. sapiens	LAMA3	laminin subunit alpha 3	GO:0035987 endodermal cell differentiation;GO:0001738 morphogenesis of a polarized epithelium;GO:0001706 endoderm formation		Disease related genes; Predicted intracellular proteins; Human disease related genes:Congenital malformations:Congenital malformations of skin; Predicted secreted proteins	Endoplasmic reticulum (Approved)	Lanoteplase	(M158)PID INTEGRIN4 PATHWAY; (M165)PID SYNDECAN 4 PATHWAY; (M240)PID SYNDECAN 2 PATHWAY	(M5915)HALLMARK APICAL JUNCTION; (M5930)HALLMARK EPITHELIAL MESENCHYMAL TRANSITION	0.0	0.0	1.0	0.0	1.0	0.0	0.0	0.0	1.0	0.0	0.0	0.0	0.0	0.0	0.0	0.0	0.0	1.0	0.0	0.0
MT-TL1	4567	gene_synonym	H. sapiens	4567	H. sapiens	TRNL1	tRNA								0.0	0.0	0.0	0.0	0.0	0.0	0.0	0.0	0.0	0.0	0.0	0.0	0.0	0.0	0.0	0.0	0.0	0.0	0.0	0.0
LYNX1	66004	symbol	H. sapiens	66004	H. sapiens	LYNX1	Ly6/neurotoxin 1	GO:0099601 regulation of neurotransmitter receptor activity;GO:2000272 negative regulation of signaling receptor activity;GO:0010469 regulation of signaling receptor activity		Predicted intracellular proteins					0.0	0.0	0.0	0.0	0.0	0.0	0.0	0.0	0.0	0.0	0.0	0.0	1.0	0.0	0.0	0.0	0.0	0.0	0.0	0.0
PGLYRP2	114770	symbol	H. sapiens	114770	H. sapiens	PGLYRP2	peptidoglycan recognition protein 2	GO:0001519 peptide amidation;GO:0032824 negative regulation of natural killer cell differentiation;GO:0032827 negative regulation of natural killer cell differentiation involved in immune response		Predicted secreted proteins; Enzymes; ENZYME proteins:Hydrolases	Cell Junctions (Approved)	Zinc; Copper; Zinc acetate; Zinc chloride; Zinc sulfate, unspecified form			0.0	0.0	0.0	1.0	0.0	0.0	0.0	0.0	1.0	0.0	0.0	1.0	0.0	1.0	0.0	0.0	0.0	0.0	0.0	0.0
SPRR2G	6706	symbol	H. sapiens	6706	H. sapiens	SPRR2G	small proline rich protein 2G	GO:0031424 keratinization;GO:0030216 keratinocyte differentiation;GO:0009913 epidermal cell differentiation		Predicted intracellular proteins					0.0	0.0	0.0	0.0	1.0	0.0	0.0	0.0	0.0	0.0	0.0	0.0	0.0	0.0	0.0	0.0	0.0	0.0	0.0	0.0
SLC16A1	6566	symbol	H. sapiens	6566	H. sapiens	SLC16A1	solute carrier family 16 member 1	GO:0015728 mevalonate transport;GO:0051780 behavioral response to nutrient;GO:0035879 plasma membrane lactate transport		Disease related genes; Transporters:Electrochemical Potential-driven transporters; Potential drug targets; Human disease related genes:Congenital disorders of metabolism:Other congenital disorders of metabolism	Cell Junctions;Plasma membrane (Enhanced)	Pyruvic acid; Mersalyl		(M5906)HALLMARK ESTROGEN RESPONSE EARLY; (M5907)HALLMARK ESTROGEN RESPONSE LATE	0.0	0.0	0.0	0.0	0.0	0.0	0.0	0.0	0.0	0.0	0.0	0.0	0.0	0.0	0.0	0.0	0.0	0.0	0.0	0.0
UBASH3A	53347	symbol	H. sapiens	53347	H. sapiens	UBASH3A	ubiquitin associated and SH3 domain containing A	GO:0050860 negative regulation of T cell receptor signaling pathway;GO:0050858 negative regulation of antigen receptor-mediated signaling pathway;GO:0050856 regulation of T cell receptor signaling pathway		Predicted intracellular proteins	Nucleoplasm (Supported); Additional: Golgi apparatus				0.0	0.0	0.0	0.0	0.0	0.0	0.0	0.0	1.0	0.0	0.0	0.0	0.0	0.0	0.0	0.0	0.0	0.0	0.0	0.0
RASL10A	10633	symbol	H. sapiens	10633	H. sapiens	RASL10A	RAS like family 10 member A	GO:0007264 small GTPase mediated signal transduction;GO:0035556 intracellular signal transduction;GO:0007165 signal transduction		Predicted intracellular proteins; Enzymes; ENZYME proteins:Hydrolases					0.0	0.0	0.0	0.0	0.0	0.0	0.0	0.0	0.0	0.0	0.0	0.0	0.0	0.0	0.0	0.0	0.0	0.0	0.0	0.0
MMP9	4318	symbol	H. sapiens	4318	H. sapiens	MMP9	matrix metallopeptidase 9	GO:2000697 negative regulation of epithelial cell differentiation involved in kidney development;GO:2001268 negative regulation of cysteine-type endopeptidase activity involved in apoptotic signaling pathway;GO:1900122 positive regulation of receptor binding		FDA approved drug targets:Small molecule drugs; Human disease related genes:Congenital malformations:Congenital malformations of the musculoskeletal system; ENZYME proteins:Hydrolases; Human disease related genes:Cancers:Cancers of male genital organs; Predicted secreted proteins; Candidate cardiovascular disease genes; Disease related genes; Peptidases:Metallopeptidases; Enzymes; Cancer-related …	Cytosol (Approved)	Glutathione; Marimastat; Minocycline; Captopril; Glucosamine; Zinc; 2-Amino-N,3,3-Trimethylbutanamide; 2-{[Formyl(Hydroxy)Amino]Methyl}-4-Methylpentanoic Acid; AE-941; PG-530742; Endostatin; 5-(4-PHENOXYPHENYL)-5-(4-PYRIMIDIN-2-YLPIPERAZIN-1-YL)PYRIMIDINE-2,4,6(2H,3H)-TRIONE; (2R)-2-AMINO-3,3,3-TRIFLUORO-N-HYDROXY-2-{[(4-PHENOXYPHENYL)SULFONYL]METHYL}PROPANAMIDE; (3R)-4,4-DIFLUORO-3-[(4-METHOXYPH…	(M63)PID AVB3 OPN PATHWAY; (M165)PID SYNDECAN 4 PATHWAY; (M65)PID FRA PATHWAY	(M5946)HALLMARK COAGULATION; (M5915)HALLMARK APICAL JUNCTION; (M5950)HALLMARK ALLOGRAFT REJECTION	1.0	0.0	1.0	0.0	0.0	1.0	0.0	0.0	0.0	0.0	0.0	1.0	0.0	0.0	0.0	0.0	0.0	0.0	0.0	0.0
PKP1	5317	symbol	H. sapiens	5317	H. sapiens	PKP1	plakophilin 1	GO:0045110 intermediate filament bundle assembly;GO:1902373 negative regulation of mRNA catabolic process;GO:0045109 intermediate filament organization		Disease related genes; Human disease related genes:Congenital malformations:Congenital malformations of skin; Predicted intracellular proteins	Nucleoplasm;Plasma membrane (Approved)			(M5891)HALLMARK HYPOXIA; (M5956)HALLMARK KRAS SIGNALING DN	0.0	0.0	0.0	0.0	1.0	0.0	0.0	0.0	0.0	0.0	0.0	0.0	0.0	0.0	0.0	0.0	0.0	1.0	0.0	0.0
GZMM	3004	symbol	H. sapiens	3004	H. sapiens	GZMM	granzyme M	GO:0001913 T cell mediated cytotoxicity;GO:0019835 cytolysis;GO:0002456 T cell mediated immunity		Predicted secreted proteins; Peptidases:Serine-type peptidases; Predicted intracellular proteins; Enzymes					0.0	1.0	0.0	0.0	0.0	1.0	0.0	0.0	0.0	0.0	0.0	0.0	0.0	0.0	0.0	0.0	0.0	0.0	1.0	0.0
SNAP91	9892	symbol	H. sapiens	9892	H. sapiens	SNAP91	synaptosome associated protein 91	GO:0016185 synaptic vesicle budding from presynaptic endocytic zone membrane;GO:0070142 synaptic vesicle budding;GO:0048268 clathrin coat assembly		Predicted intracellular proteins	Centrosome;Cytosol (Uncertain)			(M5951)HALLMARK SPERMATOGENESIS; (M5953)HALLMARK KRAS SIGNALING UP	0.0	0.0	0.0	0.0	0.0	0.0	0.0	0.0	0.0	0.0	0.0	0.0	0.0	0.0	0.0	0.0	0.0	0.0	0.0	0.0
CD2	914	symbol	H. sapiens	914	H. sapiens	CD2	CD2 molecule	GO:0030887 positive regulation of myeloid dendritic cell activation;GO:0001766 membrane raft polarization;GO:0030885 regulation of myeloid dendritic cell activation		Predicted intracellular proteins; FDA approved drug targets:Biotech drugs; CD markers	Plasma membrane (Supported); Additional: Golgi apparatus;Nucleoplasm	Alefacept; Siplizumab		(M5902)HALLMARK APOPTOSIS; (M5950)HALLMARK ALLOGRAFT REJECTION	0.0	0.0	1.0	0.0	0.0	1.0	0.0	0.0	1.0	0.0	1.0	0.0	0.0	0.0	0.0	0.0	1.0	1.0	1.0	0.0
PPP4R4	57718	symbol	H. sapiens	57718	H. sapiens	PPP4R4	protein phosphatase 4 regulatory subunit 4	GO:0080163 regulation of protein serine/threonine phosphatase activity;GO:0032515 negative regulation of phosphoprotein phosphatase activity;GO:0001835 blastocyst hatching		Predicted intracellular proteins	Cytosol (Supported)				0.0	0.0	0.0	0.0	0.0	0.0	0.0	0.0	0.0	0.0	0.0	0.0	0.0	0.0	0.0	0.0	0.0	0.0	0.0	0.0
LILRA4	23547	symbol	H. sapiens	23547	H. sapiens	LILRA4	leukocyte immunoglobulin like receptor A4	GO:0034156 negative regulation of toll-like receptor 7 signaling pathway;GO:0034164 negative regulation of toll-like receptor 9 signaling pathway;GO:0032687 negative regulation of interferon-alpha production		CD markers					0.0	0.0	1.0	0.0	0.0	0.0	1.0	1.0	0.0	0.0	1.0	0.0	0.0	0.0	0.0	0.0	0.0	0.0	0.0	0.0
CCL4L1	388372	symbol	H. sapiens	388372	H. sapiens	CCL4L1	C-C motif chemokine ligand 4 like 1	GO:0048245 eosinophil chemotaxis;GO:0072677 eosinophil migration;GO:0002548 monocyte chemotaxis							0.0	0.0	1.0	0.0	0.0	0.0	0.0	0.0	0.0	0.0	0.0	0.0	1.0	0.0	0.0	0.0	0.0	0.0	0.0	0.0
LINGO3	645191	symbol	H. sapiens	645191	H. sapiens	LINGO3	leucine rich repeat and Ig domain containing 3				Mitochondria (Approved)				0.0	0.0	0.0	0.0	0.0	0.0	0.0	0.0	0.0	0.0	0.0	0.0	0.0	0.0	0.0	0.0	0.0	0.0	0.0	0.0
ZNF92P3	730087	gene_synonym	H. sapiens	730087	H. sapiens	ZNF726	zinc finger protein 726	GO:0006357 regulation of transcription by RNA polymerase II;GO:0006355 regulation of transcription, DNA-templated;GO:1903506 regulation of nucleic acid-templated transcription		Transcription factors:Zinc-coordinating DNA-binding domains; Predicted intracellular proteins					0.0	0.0	0.0	0.0	0.0	0.0	0.0	0.0	0.0	0.0	0.0	0.0	0.0	0.0	0.0	0.0	0.0	0.0	0.0	0.0
CD3E	916	symbol	H. sapiens	916	H. sapiens	CD3E	CD3 epsilon subunit of T-cell receptor complex	GO:0002669 positive regulation of T cell anergy;GO:0002913 positive regulation of lymphocyte anergy;GO:0033634 positive regulation of cell-cell adhesion mediated by integrin		CD markers; Disease related genes; Human disease related genes:Immune system diseases:Primary immunodeficiency; Transporters:Accessory Factors Involved in Transport; FDA approved drug targets:Biotech drugs	Endoplasmic reticulum;Plasma membrane (Supported); Additional: Golgi apparatus	Muromonab; Catumaxomab	(M290)PID IL12 STAT4 PATHWAY; (M196)PID IL23 PATHWAY; (M88)PID CD8 TCR PATHWAY	(M5950)HALLMARK ALLOGRAFT REJECTION	0.0	1.0	1.0	0.0	0.0	1.0	1.0	1.0	1.0	0.0	1.0	0.0	0.0	0.0	0.0	0.0	1.0	0.0	0.0	0.0
CR1	1378	symbol	H. sapiens	1378	H. sapiens	CR1	complement C3b/C4b receptor 1 (Knops blood group)	GO:0002435 immune complex clearance by erythrocytes;GO:1900099 negative regulation of plasma cell differentiation;GO:0001970 positive regulation of activation of membrane attack complex		Blood group antigen proteins; CD markers				(M5921)HALLMARK COMPLEMENT	0.0	1.0	0.0	0.0	0.0	1.0	1.0	0.0	1.0	1.0	0.0	1.0	0.0	1.0	1.0	1.0	1.0	0.0	1.0	0.0
ADAMTS15	170689	symbol	H. sapiens	170689	H. sapiens	ADAMTS15	ADAM metallopeptidase with thrombospondin type 1 motif 15	GO:0007520 myoblast fusion;GO:0000768 syncytium formation by plasma membrane fusion;GO:0140253 cell-cell fusion		Predicted secreted proteins	Cytosol (Approved)		(M3468)NABA ECM REGULATORS; (M5885)NABA MATRISOME ASSOCIATED; (M5889)NABA MATRISOME		1.0	0.0	0.0	0.0	0.0	0.0	0.0	0.0	0.0	0.0	0.0	0.0	0.0	0.0	0.0	0.0	0.0	0.0	0.0	1.0
SLAMF6	114836	symbol	H. sapiens	114836	H. sapiens	SLAMF6	SLAM family member 6	GO:0072540 T-helper 17 cell lineage commitment;GO:0072539 T-helper 17 cell differentiation;GO:0002295 T-helper cell lineage commitment		CD markers	Cytosol;Plasma membrane (Approved)				0.0	1.0	0.0	0.0	0.0	1.0	1.0	1.0	0.0	1.0	1.0	1.0	0.0	1.0	0.0	0.0	0.0	0.0	1.0	0.0
RP11-509A17.3						None	None	None	None	None	None	None	None	None	nan	nan	nan	nan	nan	nan	nan	nan	nan	nan	nan	nan	nan	nan	nan	nan	nan	nan	nan	nan
CX3CL1	6376	symbol	H. sapiens	6376	H. sapiens	CX3CL1	C-X3-C motif chemokine ligand 1	GO:0051041 positive regulation of calcium-independent cell-cell adhesion;GO:1900450 negative regulation of glutamate receptor signaling pathway;GO:0051040 regulation of calcium-independent cell-cell adhesion		Predicted secreted proteins	Plasma membrane (Supported)		(M145)PID P53 DOWNSTREAM PATHWAY; (M5883)NABA SECRETED FACTORS; (M5885)NABA MATRISOME ASSOCIATED	(M5916)HALLMARK APICAL SURFACE; (M5915)HALLMARK APICAL JUNCTION; (M5932)HALLMARK INFLAMMATORY RESPONSE	1.0	0.0	1.0	0.0	0.0	1.0	0.0	0.0	1.0	1.0	1.0	1.0	1.0	0.0	0.0	0.0	0.0	1.0	1.0	0.0
SAA2-SAA4	100528017	symbol	H. sapiens	100528017	H. sapiens	SAA2-SAA4	SAA2-SAA4 readthrough								0.0	0.0	0.0	0.0	0.0	0.0	0.0	0.0	0.0	0.0	0.0	0.0	0.0	0.0	0.0	0.0	0.0	0.0	0.0	0.0
CTC-526N19.1						None	None	None	None	None	None	None	None	None	nan	nan	nan	nan	nan	nan	nan	nan	nan	nan	nan	nan	nan	nan	nan	nan	nan	nan	nan	nan
CGB	1082	gene_synonym	H. sapiens	1082	H. sapiens	CGB3	chorionic gonadotropin subunit beta 3	GO:0009755 hormone-mediated signaling pathway;GO:0007292 female gamete generation;GO:0032870 cellular response to hormone stimulus		Predicted secreted proteins	Cytosol (Approved)				0.0	0.0	0.0	0.0	0.0	0.0	0.0	0.0	0.0	0.0	0.0	0.0	0.0	0.0	0.0	0.0	0.0	0.0	0.0	0.0
CCL5	6352	symbol	H. sapiens	6352	H. sapiens	CCL5	C-C motif chemokine ligand 5	GO:2000503 positive regulation of natural killer cell chemotaxis;GO:0031584 activation of phospholipase D activity;GO:0033634 positive regulation of cell-cell adhesion mediated by integrin		Predicted secreted proteins; Human disease related genes:Skin diseases:Skin and soft tissue diseases; Cancer-related genes:Candidate cancer biomarkers; Human disease related genes:Immune system diseases:Allergies and autoimmune diseases		Heparin Disaccharide I-S; Heparin Disaccharide Iii-S	(M165)PID SYNDECAN 4 PATHWAY; (M198)PID SYNDECAN 1 PATHWAY; (M254)PID MYC REPRESS PATHWAY	(M5890)HALLMARK TNFA SIGNALING VIA NFKB; (M5913)HALLMARK INTERFERON GAMMA RESPONSE; (M5921)HALLMARK COMPLEMENT	1.0	0.0	1.0	1.0	0.0	1.0	1.0	0.0	1.0	1.0	0.0	1.0	1.0	0.0	0.0	0.0	0.0	1.0	0.0	0.0
CLEC9A	283420	symbol	H. sapiens	283420	H. sapiens	CLEC9A	C-type lectin domain containing 9A	GO:0006898 receptor-mediated endocytosis;GO:0001819 positive regulation of cytokine production;GO:0006897 endocytosis		CD markers			(M5880)NABA ECM AFFILIATED; (M5885)NABA MATRISOME ASSOCIATED; (M5889)NABA MATRISOME		1.0	0.0	0.0	0.0	0.0	0.0	0.0	0.0	0.0	0.0	1.0	0.0	0.0	0.0	0.0	0.0	0.0	0.0	0.0	1.0
CTD-2531D15.4						None	None	None	None	None	None	None	None	None	nan	nan	nan	nan	nan	nan	nan	nan	nan	nan	nan	nan	nan	nan	nan	nan	nan	nan	nan	nan
TAT	6898	symbol	H. sapiens	6898	H. sapiens	TAT	tyrosine aminotransferase	GO:0006572 tyrosine catabolic process;GO:0006558 L-phenylalanine metabolic process;GO:0006559 L-phenylalanine catabolic process		Predicted intracellular proteins; Human disease related genes:Congenital disorders of metabolism:Congenital disorders of amino acid metabolism; ENZYME proteins:Transferases; Disease related genes; Potential drug targets; Enzymes		Pyridoxal phosphate; Phenylalanine; Tyrosine; Glutamic acid	(M106)PID HNF3B PATHWAY	(M5934)HALLMARK XENOBIOTIC METABOLISM	0.0	0.0	0.0	0.0	0.0	0.0	0.0	0.0	0.0	0.0	0.0	0.0	0.0	0.0	0.0	0.0	0.0	0.0	0.0	0.0
GBP5	115362	symbol	H. sapiens	115362	H. sapiens	GBP5	guanylate binding protein 5	GO:0032741 positive regulation of interleukin-18 production;GO:1900227 positive regulation of NLRP3 inflammasome complex assembly;GO:0032661 regulation of interleukin-18 production		Predicted intracellular proteins					0.0	0.0	1.0	1.0	0.0	0.0	1.0	0.0	0.0	1.0	1.0	1.0	0.0	0.0	0.0	0.0	0.0	0.0	0.0	0.0
RP11-344B5.2						None	None	None	None	None	None	None	None	None	nan	nan	nan	nan	nan	nan	nan	nan	nan	nan	nan	nan	nan	nan	nan	nan	nan	nan	nan	nan
DPPA2	151871	symbol	H. sapiens	151871	H. sapiens	DPPA2	developmental pluripotency associated 2	GO:0048731 system development;GO:0007275 multicellular organism development;GO:0048856 anatomical structure development		Predicted intracellular proteins	Nucleoplasm (Approved)				0.0	0.0	0.0	0.0	0.0	0.0	0.0	0.0	0.0	0.0	0.0	0.0	0.0	0.0	0.0	0.0	0.0	0.0	0.0	0.0
SERPINA3	12	symbol	H. sapiens	12	H. sapiens	SERPINA3	serpin family A member 3	GO:0030277 maintenance of gastrointestinal epithelium;GO:0010669 epithelial structure maintenance;GO:0006953 acute-phase response		Predicted intracellular proteins; Predicted secreted proteins; Cancer-related genes:Candidate cancer biomarkers; Candidate cardiovascular disease genes		Zinc; Zinc acetate; Zinc chloride; Zinc sulfate, unspecified form	(M3468)NABA ECM REGULATORS; (M5885)NABA MATRISOME ASSOCIATED; (M5889)NABA MATRISOME	(M5907)HALLMARK ESTROGEN RESPONSE LATE; (M5953)HALLMARK KRAS SIGNALING UP	1.0	0.0	1.0	0.0	0.0	0.0	0.0	0.0	0.0	0.0	0.0	0.0	0.0	0.0	0.0	0.0	0.0	0.0	0.0	0.0
SIT1	27240	symbol	H. sapiens	27240	H. sapiens	SIT1	signaling threshold regulating transmembrane adaptor 1	GO:0043029 T cell homeostasis;GO:0002260 lymphocyte homeostasis;GO:0001776 leukocyte homeostasis						(M5950)HALLMARK ALLOGRAFT REJECTION	0.0	1.0	0.0	0.0	0.0	0.0	0.0	0.0	1.0	0.0	0.0	0.0	0.0	0.0	0.0	0.0	0.0	0.0	0.0	0.0
RP11-11N5.1						None	None	None	None	None	None	None	None	None	nan	nan	nan	nan	nan	nan	nan	nan	nan	nan	nan	nan	nan	nan	nan	nan	nan	nan	nan	nan
SLC22A3	6581	symbol	H. sapiens	6581	H. sapiens	SLC22A3	solute carrier family 22 member 3	GO:0051625 epinephrine uptake;GO:0051615 histamine uptake;GO:0048241 epinephrine transport		Transporters:Electrochemical Potential-driven transporters	Vesicles (Approved); Additional: Cytosol				0.0	0.0	0.0	0.0	0.0	0.0	0.0	0.0	0.0	0.0	0.0	0.0	0.0	0.0	0.0	0.0	0.0	0.0	0.0	0.0
RP11-3P17.4						None	None	None	None	None	None	None	None	None	nan	nan	nan	nan	nan	nan	nan	nan	nan	nan	nan	nan	nan	nan	nan	nan	nan	nan	nan	nan
RPL37P1	140696	symbol	H. sapiens	140696	H. sapiens	RPL37P1	ribosomal protein L37 pseudogene 1								0.0	0.0	0.0	0.0	0.0	0.0	0.0	0.0	0.0	0.0	0.0	0.0	0.0	0.0	0.0	0.0	0.0	0.0	0.0	0.0
ARHGEF26-AS1	100507524	symbol	H. sapiens	100507524	H. sapiens	ARHGEF26-AS1	ARHGEF26 antisense RNA 1								0.0	0.0	0.0	0.0	0.0	0.0	0.0	0.0	0.0	0.0	0.0	0.0	0.0	0.0	0.0	0.0	0.0	0.0	0.0	0.0
FAM83A-AS1	100131726	symbol	H. sapiens	100131726	H. sapiens	FAM83A-AS1	FAM83A antisense RNA 1								0.0	0.0	0.0	0.0	0.0	0.0	0.0	0.0	0.0	0.0	0.0	0.0	0.0	0.0	0.0	0.0	0.0	0.0	0.0	0.0
LINGO2	158038	symbol	H. sapiens	158038	H. sapiens	LINGO2	leucine rich repeat and Ig domain containing 2	GO:0051965 positive regulation of synapse assembly;GO:0051963 regulation of synapse assembly;GO:1901890 positive regulation of cell junction assembly							0.0	0.0	0.0	0.0	0.0	0.0	0.0	0.0	0.0	0.0	0.0	0.0	0.0	0.0	0.0	0.0	0.0	0.0	0.0	0.0
P2RY10	27334	symbol	H. sapiens	27334	H. sapiens	P2RY10	P2Y receptor family member 10	GO:0035589 G protein-coupled purinergic nucleotide receptor signaling pathway;GO:0035590 purinergic nucleotide receptor signaling pathway;GO:0051482 positive regulation of cytosolic calcium ion concentration involved in phospholipase C-activating G protein-coupled signaling pathway		G-protein coupled receptors:GPCRs excl olfactory receptors; G-protein coupled receptors:Adenosine and adenine nucleotide receptors					0.0	0.0	0.0	0.0	0.0	0.0	0.0	0.0	0.0	0.0	0.0	0.0	1.0	0.0	0.0	0.0	0.0	0.0	0.0	0.0
LILRB4	11006	symbol	H. sapiens	11006	H. sapiens	LILRB4	leukocyte immunoglobulin like receptor B4	GO:0045584 negative regulation of cytotoxic T cell differentiation;GO:0140105 interleukin-10-mediated signaling pathway;GO:0150102 negative regulation of monocyte activation		Predicted intracellular proteins; CD markers					0.0	1.0	1.0	0.0	0.0	1.0	1.0	1.0	1.0	0.0	1.0	0.0	0.0	1.0	0.0	0.0	0.0	0.0	0.0	0.0
DAB1	1600	symbol	H. sapiens	1600	H. sapiens	DAB1	DAB adaptor protein 1	GO:0021813 cell-cell adhesion involved in neuronal-glial interactions involved in cerebral cortex radial glia guided migration;GO:0021577 hindbrain structural organization;GO:0021589 cerebellum structural organization		Disease related genes; Human disease related genes:Nervous system diseases:Neurodegenerative diseases; Predicted intracellular proteins	Vesicles (Enhanced)		(M69)PID REELIN PATHWAY; (M163)PID LIS1 PATHWAY		0.0	0.0	0.0	0.0	0.0	0.0	0.0	0.0	1.0	0.0	0.0	0.0	0.0	0.0	0.0	0.0	0.0	1.0	0.0	0.0
CFAP46	54777	symbol	H. sapiens	54777	H. sapiens	CFAP46	cilia and flagella associated protein 46	GO:0035082 axoneme assembly;GO:0060294 cilium movement involved in cell motility;GO:0001578 microtubule bundle formation		Predicted intracellular proteins					0.0	0.0	0.0	0.0	0.0	0.0	0.0	0.0	0.0	0.0	0.0	0.0	0.0	0.0	0.0	0.0	0.0	0.0	0.0	0.0
FABP4	2167	symbol	H. sapiens	2167	H. sapiens	FABP4	fatty acid binding protein 4	GO:0071285 cellular response to lithium ion;GO:0050872 white fat cell differentiation;GO:0010226 response to lithium ion		Predicted intracellular proteins; Cancer-related genes:Candidate cancer biomarkers			(M167)PID AP1 PATHWAY	(M5905)HALLMARK ADIPOGENESIS	0.0	0.0	1.0	1.0	0.0	0.0	0.0	0.0	0.0	1.0	0.0	1.0	0.0	0.0	0.0	0.0	0.0	0.0	0.0	0.0
AC006116.20						None	None	None	None	None	None	None	None	None	nan	nan	nan	nan	nan	nan	nan	nan	nan	nan	nan	nan	nan	nan	nan	nan	nan	nan	nan	nan
RP11-923I11.6						None	None	None	None	None	None	None	None	None	nan	nan	nan	nan	nan	nan	nan	nan	nan	nan	nan	nan	nan	nan	nan	nan	nan	nan	nan	nan
LAMB3	3914	symbol	H. sapiens	3914	H. sapiens	LAMB3	laminin subunit beta 3	GO:0070831 basement membrane assembly;GO:0071711 basement membrane organization;GO:0050873 brown fat cell differentiation		Human disease related genes:Congenital malformations:Congenital malformations of skin; Predicted secreted proteins; Disease related genes; Human disease related genes:Digestive system diseases:Mouth and dental diseases; Predicted intracellular proteins	Vesicles (Approved)		(M158)PID INTEGRIN4 PATHWAY; (M5887)NABA BASEMENT MEMBRANES; (M239)PID A6B1 A6B4 INTEGRIN PATHWAY	(M5890)HALLMARK TNFA SIGNALING VIA NFKB; (M5915)HALLMARK APICAL JUNCTION	0.0	0.0	0.0	0.0	1.0	0.0	0.0	0.0	0.0	0.0	0.0	0.0	0.0	0.0	0.0	0.0	0.0	0.0	0.0	0.0
LINC00163	727699	symbol	H. sapiens	727699	H. sapiens	LINC00163	long intergenic non-protein coding RNA 163								0.0	0.0	0.0	0.0	0.0	0.0	0.0	0.0	0.0	0.0	0.0	0.0	0.0	0.0	0.0	0.0	0.0	0.0	0.0	0.0
MMP3	4314	symbol	H. sapiens	4314	H. sapiens	MMP3	matrix metallopeptidase 3	GO:0010727 negative regulation of hydrogen peroxide metabolic process;GO:0071492 cellular response to UV-A;GO:0070141 response to UV-A		Predicted intracellular proteins; ENZYME proteins:Hydrolases; Predicted secreted proteins; Candidate cardiovascular disease genes; Disease related genes; Human disease related genes:Cardiovascular diseases:Vascular diseases; Potential drug targets; Peptidases:Metallopeptidases; Enzymes; Cancer-related genes:Candidate cancer biomarkers	Vesicles (Supported)	Marimastat; N-Hydroxy 1n(4-Methoxyphenyl)Sulfonyl-4-(Z,E-N-Methoxyimino)Pyrrolidine-2r-Carboxamide; 3-Methylpyridine; A Disubstituted Succinyl Caprolactam Hydroxymate Mmp3inhibitor; N-Hydroxy-4-[(4-Methoxylphenyl)Sulfonyl]-2,2-Dimethyl-Hexahydro-1,4-Thiazepine-3(S)-Carboxamide; (1n)-4-N-Butoxyphenylsulfonyl-(2r)-N-Hydroxycarboxamido-(4s)-Methanesulfonylamino-Pyrrolidine; 3-(1h-Indol-3-Yl)-2-[4-(4…	(M174)PID UPA UPAR PATHWAY; (M142)PID AJDISS 2PATHWAY; (M153)PID P75 NTR PATHWAY	(M5946)HALLMARK COAGULATION; (M5930)HALLMARK EPITHELIAL MESENCHYMAL TRANSITION	1.0	0.0	1.0	0.0	0.0	0.0	0.0	0.0	0.0	0.0	0.0	1.0	1.0	0.0	0.0	0.0	0.0	0.0	0.0	0.0
IL33	90865	symbol	H. sapiens	90865	H. sapiens	IL33	interleukin 33	GO:0010185 regulation of cellular defense response;GO:0010186 positive regulation of cellular defense response;GO:0120042 negative regulation of macrophage proliferation		Predicted intracellular proteins; Predicted secreted proteins	Nucleoplasm (Supported); Additional: Vesicles			(M5953)HALLMARK KRAS SIGNALING UP	0.0	0.0	1.0	0.0	0.0	0.0	0.0	0.0	1.0	1.0	1.0	1.0	0.0	0.0	0.0	0.0	0.0	0.0	0.0	0.0
DMBX1	127343	symbol	H. sapiens	127343	H. sapiens	DMBX1	diencephalon/mesencephalon homeobox 1	GO:0008343 adult feeding behavior;GO:0008344 adult locomotory behavior;GO:0007631 feeding behavior		Transcription factors:Helix-turn-helix domains; Predicted intracellular proteins					0.0	0.0	0.0	0.0	0.0	0.0	0.0	0.0	0.0	0.0	0.0	0.0	0.0	0.0	0.0	0.0	0.0	0.0	0.0	0.0
TRAC	28755	symbol	H. sapiens	28755	H. sapiens	TRAC	T cell receptor alpha constant	GO:0046631 alpha-beta T cell activation;GO:0050852 T cell receptor signaling pathway;GO:0050851 antigen receptor-mediated signaling pathway							0.0	1.0	0.0	1.0	0.0	1.0	1.0	0.0	0.0	0.0	0.0	0.0	0.0	0.0	0.0	0.0	0.0	0.0	0.0	0.0
CCR5	1234	symbol	H. sapiens	1234	H. sapiens	CCR5	C-C motif chemokine receptor 5	GO:2000110 negative regulation of macrophage apoptotic process;GO:0014808 release of sequestered calcium ion into cytosol by sarcoplasmic reticulum;GO:1903514 release of sequestered calcium ion into cytosol by endoplasmic reticulum		Human disease related genes:Immune system diseases:Allergies and autoimmune diseases; G-protein coupled receptors:Chemokines and chemotactic factors receptors; CD markers; Disease related genes; G-protein coupled receptors:GPCRs excl olfactory receptors; FDA approved drug targets:Small molecule drugs		Maraviroc; AMD-070; CCR5 mAb; Leronlimab; Aplaviroc; Vicriviroc; Ibalizumab; INCB-9471	(M54)PID IL12 2PATHWAY	(M5950)HALLMARK ALLOGRAFT REJECTION	0.0	0.0	1.0	1.0	0.0	0.0	0.0	0.0	0.0	0.0	0.0	0.0	1.0	0.0	0.0	0.0	0.0	0.0	0.0	0.0
CGB8	94115	symbol	H. sapiens	94115	H. sapiens	CGB8	chorionic gonadotropin subunit beta 8			Predicted secreted proteins	Cytosol (Approved)				0.0	0.0	0.0	0.0	0.0	0.0	0.0	0.0	0.0	0.0	0.0	0.0	0.0	0.0	0.0	0.0	0.0	0.0	0.0	0.0
SIGLEC12	89858	symbol	H. sapiens	89858	H. sapiens	SIGLEC12	sialic acid binding Ig like lectin 12	GO:0007155 cell adhesion;GO:0009987 cellular process;GO:0008150 biological_process							0.0	0.0	0.0	0.0	0.0	0.0	0.0	1.0	0.0	0.0	0.0	0.0	0.0	0.0	0.0	0.0	0.0	0.0	0.0	0.0
IL2RG	3561	symbol	H. sapiens	3561	H. sapiens	IL2RG	interleukin 2 receptor subunit gamma	GO:0038111 interleukin-7-mediated signaling pathway;GO:0035771 interleukin-4-mediated signaling pathway;GO:0038110 interleukin-2-mediated signaling pathway		CD markers; Disease related genes; Human disease related genes:Immune system diseases:Primary immunodeficiency; Predicted intracellular proteins; Cancer-related genes:Candidate cancer biomarkers; FDA approved drug targets:Biotech drugs	Vesicles (Approved)	Denileukin diftitox; Aldesleukin; Resatorvid	(M234)PID IL2 STAT5 PATHWAY; (M143)PID IL2 PI3K PATHWAY; (M122)PID IL2 1PATHWAY	(M5916)HALLMARK APICAL SURFACE; (M5897)HALLMARK IL6 JAK STAT3 SIGNALING; (M5923)HALLMARK PI3K AKT MTOR SIGNALING	0.0	0.0	1.0	0.0	0.0	0.0	0.0	0.0	0.0	0.0	0.0	0.0	0.0	0.0	0.0	0.0	0.0	0.0	0.0	0.0
FCN1	2219	symbol	H. sapiens	2219	H. sapiens	FCN1	ficolin 1	GO:0043654 recognition of apoptotic cell;GO:0002752 cell surface pattern recognition receptor signaling pathway;GO:1903028 positive regulation of opsonization		Predicted secreted proteins			(M5880)NABA ECM AFFILIATED; (M5885)NABA MATRISOME ASSOCIATED; (M5889)NABA MATRISOME	(M5921)HALLMARK COMPLEMENT	1.0	0.0	0.0	0.0	0.0	1.0	1.0	0.0	0.0	1.0	1.0	1.0	0.0	1.0	1.0	0.0	0.0	0.0	1.0	1.0
RP11-652L8.4						None	None	None	None	None	None	None	None	None	nan	nan	nan	nan	nan	nan	nan	nan	nan	nan	nan	nan	nan	nan	nan	nan	nan	nan	nan	nan
CNR2	1269	symbol	H. sapiens	1269	H. sapiens	CNR2	cannabinoid receptor 2	GO:0032229 negative regulation of synaptic transmission, GABAergic;GO:0038171 cannabinoid signaling pathway;GO:0045759 negative regulation of action potential		Transporters; G-protein coupled receptors:GPCRs excl olfactory receptors; FDA approved drug targets:Small molecule drugs		Dronabinol; Nabilone; Ricinoleic Acid; Lasofoxifene; Cannabidiol; Tetrahydrocannabivarin; Medical Cannabis; Nabiximols			0.0	0.0	1.0	1.0	0.0	0.0	0.0	0.0	1.0	0.0	0.0	1.0	1.0	0.0	0.0	0.0	0.0	0.0	0.0	0.0
CYP19A1	1588	symbol	H. sapiens	1588	H. sapiens	CYP19A1	cytochrome P450 family 19 subfamily A member 1	GO:2000866 positive regulation of estradiol secretion;GO:2000864 regulation of estradiol secretion;GO:0002677 negative regulation of chronic inflammatory response		Predicted intracellular proteins; Disease related genes; ENZYME proteins:Oxidoreductases; Cancer-related genes:Candidate cancer biomarkers; Human disease related genes:Endocrine and metabolic diseases:Gonadal diseases; Enzymes; FDA approved drug targets:Small molecule drugs	Mitochondria (Uncertain)	Nicotine; Aminoglutethimide; Estrone; Testolactone; Exemestane; Letrozole; Anastrozole; 2-Methoxyestradiol; Naringenin; Glyphosate; MPI-674			0.0	0.0	0.0	0.0	0.0	0.0	0.0	0.0	1.0	0.0	0.0	1.0	0.0	0.0	0.0	0.0	0.0	0.0	0.0	0.0
SPRR2F	6705	symbol	H. sapiens	6705	H. sapiens	SPRR2F	small proline rich protein 2F	GO:0031424 keratinization;GO:0030216 keratinocyte differentiation;GO:0009913 epidermal cell differentiation		Predicted intracellular proteins					0.0	0.0	0.0	0.0	1.0	0.0	0.0	0.0	0.0	0.0	0.0	0.0	0.0	0.0	0.0	0.0	0.0	0.0	0.0	0.0
TRBV28	28559	symbol	H. sapiens	28559	H. sapiens	TRBV28	T cell receptor beta variable 28	GO:0002250 adaptive immune response;GO:0006955 immune response;GO:0007166 cell surface receptor signaling pathway		Predicted intracellular proteins					0.0	1.0	0.0	0.0	0.0	0.0	0.0	0.0	0.0	0.0	0.0	0.0	0.0	0.0	0.0	0.0	0.0	0.0	0.0	0.0
FASLG	356	symbol	H. sapiens	356	H. sapiens	FASLG	Fas ligand	GO:1905780 regulation of phosphatidylserine exposure on apoptotic cell surface;GO:1905782 positive regulation of phosphatidylserine exposure on apoptotic cell surface;GO:0046666 retinal cell programmed cell death		RAS pathway related proteins; Predicted secreted proteins; CD markers; Disease related genes; Human disease related genes:Immune system diseases:Primary immunodeficiency; Cancer-related genes:Candidate cancer biomarkers			(M5060)SA FAS SIGNALING; (M7997)SA CASPASE CASCADE; (M235)PID TCR CALCIUM PATHWAY	(M5923)HALLMARK PI3K AKT MTOR SIGNALING; (M5902)HALLMARK APOPTOSIS; (M5950)HALLMARK ALLOGRAFT REJECTION	1.0	0.0	1.0	1.0	0.0	0.0	0.0	0.0	0.0	0.0	0.0	0.0	0.0	0.0	0.0	0.0	0.0	0.0	1.0	0.0
TNFSF11	8600	symbol	H. sapiens	8600	H. sapiens	TNFSF11	TNF superfamily member 11	GO:0051466 positive regulation of corticotropin-releasing hormone secretion;GO:0043397 regulation of corticotropin-releasing hormone secretion;GO:0071812 positive regulation of fever generation by positive regulation of prostaglandin secretion		Human disease related genes:Congenital malformations:Congenital malformations of the musculoskeletal system; Human disease related genes:Musculoskeletal diseases:Skeletal diseases; Predicted secreted proteins; CD markers; Disease related genes; Cancer-related genes:Candidate cancer biomarkers; Predicted intracellular proteins; FDA approved drug targets:Small molecule drugs; FDA approved drug targ…		Lenalidomide; AMGN-0007; Denosumab; Thiocolchicoside	(M183)PID IL6 7 PATHWAY; (M5883)NABA SECRETED FACTORS; (M5885)NABA MATRISOME ASSOCIATED	(M5947)HALLMARK IL2 STAT5 SIGNALING	1.0	0.0	1.0	0.0	0.0	1.0	0.0	0.0	1.0	1.0	0.0	1.0	0.0	0.0	0.0	0.0	0.0	0.0	0.0	0.0
AJAP1	55966	symbol	H. sapiens	55966	H. sapiens	AJAP1	adherens junctions associated protein 1	GO:0030860 regulation of polarized epithelial cell differentiation;GO:0001953 negative regulation of cell-matrix adhesion;GO:0010812 negative regulation of cell-substrate adhesion							0.0	0.0	0.0	0.0	0.0	0.0	0.0	0.0	1.0	0.0	0.0	1.0	0.0	0.0	0.0	0.0	0.0	0.0	0.0	0.0
RPL29P19	389655	symbol	H. sapiens	389655	H. sapiens	RPL29P19	ribosomal protein L29 pseudogene 19								0.0	0.0	0.0	0.0	0.0	0.0	0.0	0.0	0.0	0.0	0.0	0.0	0.0	0.0	0.0	0.0	0.0	0.0	0.0	0.0
DEFB4A	1673	symbol	H. sapiens	1673	H. sapiens	DEFB4A	defensin beta 4A	GO:0031640 killing of cells of another organism;GO:0050918 positive chemotaxis;GO:0061844 antimicrobial humoral immune response mediated by antimicrobial peptide		Predicted secreted proteins; Transporters:Transporter channels and pores					0.0	0.0	1.0	1.0	0.0	0.0	0.0	0.0	0.0	0.0	0.0	0.0	0.0	0.0	1.0	0.0	0.0	0.0	0.0	0.0
SPIC	121599	symbol	H. sapiens	121599	H. sapiens	SPIC	Spi-C transcription factor	GO:0001824 blastocyst development;GO:0001701 in utero embryonic development;GO:0043009 chordate embryonic development		Transcription factors:Helix-turn-helix domains; Predicted intracellular proteins					0.0	0.0	0.0	0.0	0.0	0.0	0.0	0.0	0.0	0.0	0.0	0.0	0.0	0.0	0.0	0.0	0.0	0.0	0.0	0.0
RP3-453C12.15						None	None	None	None	None	None	None	None	None	nan	nan	nan	nan	nan	nan	nan	nan	nan	nan	nan	nan	nan	nan	nan	nan	nan	nan	nan	nan
JAKMIP3	282973	symbol	H. sapiens	282973	H. sapiens	JAKMIP3	Janus kinase and microtubule interacting protein 3			Predicted intracellular proteins					0.0	0.0	0.0	0.0	0.0	0.0	0.0	0.0	0.0	0.0	0.0	0.0	0.0	0.0	0.0	0.0	0.0	0.0	0.0	0.0
CA4	762	symbol	H. sapiens	762	H. sapiens	CA4	carbonic anhydrase 4	GO:0015701 bicarbonate transport;GO:0006730 one-carbon metabolic process;GO:0015711 organic anion transport		Predicted intracellular proteins; ENZYME proteins:Lyases; Human disease related genes:Nervous system diseases:Eye disease; Disease related genes; Enzymes; FDA approved drug targets:Small molecule drugs	Cytosol (Uncertain); Additional: Vesicles	Methyclothiazide; Topiramate; Ethoxzolamide; Bendroflumethiazide; Benzthiazide; Methazolamide; Hydroflumethiazide; Acetazolamide; Dorzolamide; Zonisamide; Trichlormethiazide; Diclofenamide; Brinzolamide; Ellagic acid; Sodium carbonate		(M5935)HALLMARK FATTY ACID METABOLISM	0.0	0.0	0.0	0.0	0.0	0.0	0.0	0.0	0.0	0.0	0.0	0.0	0.0	0.0	0.0	0.0	0.0	0.0	0.0	0.0
AJ011932.1						None	None	None	None	None	None	None	None	None	nan	nan	nan	nan	nan	nan	nan	nan	nan	nan	nan	nan	nan	nan	nan	nan	nan	nan	nan	nan
RP11-535M15.1						None	None	None	None	None	None	None	None	None	nan	nan	nan	nan	nan	nan	nan	nan	nan	nan	nan	nan	nan	nan	nan	nan	nan	nan	nan	nan
KRT17P6	284196	symbol	H. sapiens	284196	H. sapiens	KRT17P6	keratin 17 pseudogene 6								0.0	0.0	0.0	0.0	0.0	0.0	0.0	0.0	0.0	0.0	0.0	0.0	0.0	0.0	0.0	0.0	0.0	0.0	0.0	0.0
MUC3A	4584	symbol	H. sapiens	4584	H. sapiens	MUC3A	mucin 3A, cell surface associated			Predicted intracellular proteins	Cell Junctions (Uncertain)		(M5880)NABA ECM AFFILIATED; (M5885)NABA MATRISOME ASSOCIATED; (M5889)NABA MATRISOME		1.0	0.0	0.0	0.0	0.0	0.0	0.0	0.0	0.0	0.0	0.0	0.0	0.0	0.0	0.0	0.0	0.0	0.0	0.0	1.0
ADAMDEC1	27299	symbol	H. sapiens	27299	H. sapiens	ADAMDEC1	ADAM like decysin 1	GO:0007162 negative regulation of cell adhesion;GO:0030155 regulation of cell adhesion;GO:0006508 proteolysis		Predicted intracellular proteins; Predicted secreted proteins			(M3468)NABA ECM REGULATORS; (M5885)NABA MATRISOME ASSOCIATED; (M5889)NABA MATRISOME	(M5953)HALLMARK KRAS SIGNALING UP	1.0	0.0	0.0	0.0	0.0	0.0	0.0	0.0	1.0	0.0	0.0	0.0	0.0	0.0	0.0	0.0	0.0	0.0	0.0	0.0
PYHIN1	149628	symbol	H. sapiens	149628	H. sapiens	PYHIN1	pyrin and HIN domain family member 1	GO:1902164 positive regulation of DNA damage response, signal transduction by p53 class mediator resulting in transcription of p21 class mediator;GO:1902162 regulation of DNA damage response, signal transduction by p53 class mediator resulting in transcription of p21 class mediator;GO:0035457 cellular response to interferon-alpha		Predicted intracellular proteins	Nucleoli (Approved); Additional: Nucleoplasm				0.0	0.0	1.0	0.0	0.0	0.0	1.0	0.0	0.0	1.0	1.0	1.0	0.0	0.0	0.0	0.0	0.0	0.0	0.0	0.0
ELAVL3	1995	symbol	H. sapiens	1995	H. sapiens	ELAVL3	ELAV like RNA binding protein 3	GO:0007399 nervous system development;GO:0030154 cell differentiation;GO:0048869 cellular developmental process		Predicted intracellular proteins					0.0	0.0	0.0	0.0	0.0	0.0	0.0	0.0	0.0	0.0	0.0	0.0	0.0	0.0	0.0	0.0	0.0	0.0	0.0	0.0
HMGB3P10	100129320	symbol	H. sapiens	100129320	H. sapiens	HMGB3P10	high mobility group box 3 pseudogene 10								0.0	0.0	0.0	0.0	0.0	0.0	0.0	0.0	0.0	0.0	0.0	0.0	0.0	0.0	0.0	0.0	0.0	0.0	0.0	0.0
SOWAHA	134548	symbol	H. sapiens	134548	H. sapiens	SOWAHA	sosondowah ankyrin repeat domain family member A			Predicted intracellular proteins					0.0	0.0	0.0	0.0	0.0	0.0	0.0	0.0	0.0	0.0	0.0	0.0	0.0	0.0	0.0	0.0	0.0	0.0	0.0	0.0
GBA3	57733	symbol	H. sapiens	57733	H. sapiens	GBA3	glucosylceramidase beta 3 (gene/pseudogene)	GO:1903017 positive regulation of exo-alpha-sialidase activity;GO:0006683 galactosylceramide catabolic process;GO:1901804 beta-glucoside metabolic process							0.0	0.0	0.0	0.0	0.0	0.0	0.0	0.0	0.0	0.0	0.0	0.0	0.0	0.0	0.0	0.0	0.0	0.0	0.0	0.0
RP11-8L8.2						None	None	None	None	None	None	None	None	None	nan	nan	nan	nan	nan	nan	nan	nan	nan	nan	nan	nan	nan	nan	nan	nan	nan	nan	nan	nan
CTD-2589M5.5						None	None	None	None	None	None	None	None	None	nan	nan	nan	nan	nan	nan	nan	nan	nan	nan	nan	nan	nan	nan	nan	nan	nan	nan	nan	nan
RP11-701P16.5						None	None	None	None	None	None	None	None	None	nan	nan	nan	nan	nan	nan	nan	nan	nan	nan	nan	nan	nan	nan	nan	nan	nan	nan	nan	nan
FCRL3	115352	symbol	H. sapiens	115352	H. sapiens	FCRL3	Fc receptor like 3	GO:1905184 positive regulation of protein serine/threonine phosphatase activity;GO:0050859 negative regulation of B cell receptor signaling pathway;GO:0034163 regulation of toll-like receptor 9 signaling pathway		Disease related genes; Predicted intracellular proteins; CD markers					0.0	0.0	0.0	0.0	0.0	0.0	0.0	0.0	1.0	0.0	0.0	0.0	0.0	1.0	0.0	0.0	0.0	0.0	0.0	0.0
ICOS	29851	symbol	H. sapiens	29851	H. sapiens	ICOS	inducible T cell costimulator	GO:0002517 T cell tolerance induction;GO:0002507 tolerance induction;GO:0031295 T cell costimulation		Disease related genes; Human disease related genes:Immune system diseases:Primary immunodeficiency; CD markers	Plasma membrane (Approved); Additional: Actin filaments			(M5947)HALLMARK IL2 STAT5 SIGNALING	0.0	0.0	0.0	0.0	0.0	1.0	0.0	1.0	1.0	0.0	0.0	0.0	0.0	0.0	0.0	1.0	0.0	1.0	0.0	0.0
WNT5B	81029	symbol	H. sapiens	81029	H. sapiens	WNT5B	Wnt family member 5B	GO:1904103 regulation of convergent extension involved in gastrulation;GO:1904105 positive regulation of convergent extension involved in gastrulation;GO:0070307 lens fiber cell development		Predicted secreted proteins	Vesicles (Approved)		(M5493)WNT SIGNALING; (M5883)NABA SECRETED FACTORS; (M5885)NABA MATRISOME ASSOCIATED	(M5895)HALLMARK WNT BETA CATENIN SIGNALING	1.0	0.0	0.0	1.0	1.0	0.0	0.0	0.0	0.0	0.0	0.0	0.0	0.0	0.0	0.0	0.0	0.0	0.0	0.0	0.0
FCGR1C	100132417	gene_synonym	H. sapiens	100132417	H. sapiens	FCGR1CP	Fc gamma receptor Ic, pseudogene								0.0	0.0	0.0	0.0	0.0	0.0	0.0	0.0	0.0	0.0	0.0	0.0	0.0	0.0	0.0	0.0	0.0	0.0	0.0	0.0
AGXT	189	symbol	H. sapiens	189	H. sapiens	AGXT	alanine--glyoxylate and serine--pyruvate aminotransferase	GO:0019265 glycine biosynthetic process, by transamination of glyoxylate;GO:0046724 oxalic acid secretion;GO:0009436 glyoxylate catabolic process		Predicted intracellular proteins; ENZYME proteins:Transferases; Disease related genes; Potential drug targets; Human disease related genes:Congenital disorders of metabolism:Congenital disorders of carbohydrate metabolism; Enzymes	Vesicles (Supported)	Pyridoxal phosphate; Serine; Glycine; Alanine; Aminooxyacetic acid; N(6)-(pyridoxal phosphate)-L-lysine; 4-(2-AMINOPHENYL)-4-OXOBUTANOIC ACID		(M5948)HALLMARK BILE ACID METABOLISM	0.0	0.0	0.0	0.0	0.0	0.0	0.0	0.0	0.0	0.0	0.0	0.0	0.0	0.0	0.0	0.0	0.0	0.0	0.0	0.0
TSPYL6	388951	symbol	H. sapiens	388951	H. sapiens	TSPYL6	TSPY like 6	GO:0006334 nucleosome assembly;GO:0034728 nucleosome organization;GO:0031497 chromatin assembly		Predicted intracellular proteins	Nucleoplasm (Approved); Additional: Cytosol;Nucleoli				0.0	0.0	0.0	0.0	0.0	0.0	0.0	0.0	0.0	0.0	0.0	0.0	0.0	0.0	0.0	0.0	0.0	0.0	0.0	0.0
KRT16P2	400578	symbol	H. sapiens	400578	H. sapiens	KRT16P2	keratin 16 pseudogene 2								0.0	0.0	0.0	0.0	0.0	0.0	0.0	0.0	0.0	0.0	0.0	0.0	0.0	0.0	0.0	0.0	0.0	0.0	0.0	0.0
C11orf87	399947	symbol	H. sapiens	399947	H. sapiens	C11orf87	chromosome 11 open reading frame 87								0.0	0.0	0.0	0.0	0.0	0.0	0.0	0.0	0.0	0.0	0.0	0.0	0.0	0.0	0.0	0.0	0.0	0.0	0.0	0.0
TMEM145	284339	symbol	H. sapiens	284339	H. sapiens	TMEM145	transmembrane protein 145	GO:0019236 response to pheromone;GO:0007186 G protein-coupled receptor signaling pathway;GO:0010033 response to organic substance		Predicted intracellular proteins	Vesicles (Approved)				0.0	0.0	0.0	0.0	0.0	0.0	0.0	0.0	0.0	0.0	0.0	0.0	0.0	0.0	0.0	0.0	0.0	0.0	0.0	0.0
CD8A	925	symbol	H. sapiens	925	H. sapiens	CD8A	CD8a molecule	GO:0045065 cytotoxic T cell differentiation;GO:0002456 T cell mediated immunity;GO:0019882 antigen processing and presentation		Disease related genes; Human disease related genes:Immune system diseases:Primary immunodeficiency; Predicted intracellular proteins; CD markers	Plasma membrane (Supported)		(M88)PID CD8 TCR PATHWAY; (M54)PID IL12 2PATHWAY; (M272)PID CD8 TCR DOWNSTREAM PATHWAY	(M5950)HALLMARK ALLOGRAFT REJECTION	0.0	1.0	1.0	0.0	0.0	1.0	1.0	1.0	0.0	0.0	0.0	0.0	0.0	0.0	0.0	0.0	1.0	0.0	1.0	0.0
CTD-2555C10.3						None	None	None	None	None	None	None	None	None	nan	nan	nan	nan	nan	nan	nan	nan	nan	nan	nan	nan	nan	nan	nan	nan	nan	nan	nan	nan
CD163	9332	symbol	H. sapiens	9332	H. sapiens	CD163	CD163 molecule	GO:0006953 acute-phase response;GO:0002526 acute inflammatory response;GO:0006897 endocytosis		Predicted intracellular proteins; Predicted secreted proteins; CD markers	Plasma membrane (Supported)	Tetrachlorodecaoxide			0.0	0.0	1.0	0.0	0.0	0.0	0.0	0.0	0.0	0.0	0.0	0.0	0.0	0.0	0.0	0.0	0.0	0.0	0.0	0.0
CD69	969	symbol	H. sapiens	969	H. sapiens	CD69	CD69 molecule	GO:0071466 cellular response to xenobiotic stimulus;GO:0009410 response to xenobiotic stimulus;GO:0070887 cellular response to chemical stimulus		CD markers				(M5902)HALLMARK APOPTOSIS; (M5890)HALLMARK TNFA SIGNALING VIA NFKB; (M5913)HALLMARK INTERFERON GAMMA RESPONSE	0.0	0.0	0.0	0.0	0.0	0.0	0.0	0.0	0.0	0.0	0.0	0.0	0.0	0.0	0.0	1.0	0.0	0.0	0.0	0.0
LGALS17A	400696	symbol	H. sapiens	400696	H. sapiens	LGALS17A	galectin 14 pseudogene								0.0	0.0	0.0	0.0	0.0	0.0	0.0	0.0	0.0	0.0	0.0	0.0	0.0	0.0	0.0	0.0	0.0	0.0	0.0	0.0
SLC7A13	157724	symbol	H. sapiens	157724	H. sapiens	SLC7A13	solute carrier family 7 member 13	GO:0015811 L-cystine transport;GO:0000101 sulfur amino acid transport;GO:0015810 aspartate transmembrane transport		Transporters:Electrochemical Potential-driven transporters					0.0	0.0	0.0	0.0	0.0	0.0	0.0	0.0	0.0	0.0	0.0	0.0	0.0	0.0	0.0	0.0	0.0	0.0	0.0	0.0
POTEKP	440915	symbol	H. sapiens	440915	H. sapiens	POTEKP	POTE ankyrin domain family member K, pseudogene	GO:0098974 postsynaptic actin cytoskeleton organization;GO:0099188 postsynaptic cytoskeleton organization;GO:0099173 postsynapse organization							0.0	0.0	0.0	0.0	0.0	0.0	0.0	0.0	0.0	0.0	0.0	0.0	0.0	0.0	0.0	0.0	0.0	0.0	0.0	0.0
RP11-544M22.1						None	None	None	None	None	None	None	None	None	nan	nan	nan	nan	nan	nan	nan	nan	nan	nan	nan	nan	nan	nan	nan	nan	nan	nan	nan	nan
ALOX15B	247	symbol	H. sapiens	247	H. sapiens	ALOX15B	arachidonate 15-lipoxygenase type B	GO:1901696 cannabinoid biosynthetic process;GO:2001303 lipoxin A4 biosynthetic process;GO:0071926 endocannabinoid signaling pathway		ENZYME proteins:Oxidoreductases; Predicted intracellular proteins; Enzymes	Cytosol;Plasma membrane (Supported)			(M5915)HALLMARK APICAL JUNCTION; (M5939)HALLMARK P53 PATHWAY	0.0	0.0	0.0	0.0	0.0	0.0	0.0	0.0	1.0	0.0	1.0	0.0	0.0	0.0	0.0	0.0	0.0	0.0	0.0	0.0
TLR8	51311	symbol	H. sapiens	51311	H. sapiens	TLR8	toll like receptor 8	GO:0034158 toll-like receptor 8 signaling pathway;GO:0032695 negative regulation of interleukin-12 production;GO:0002755 MyD88-dependent toll-like receptor signaling pathway		CD markers		Imiquimod; Resiquimod		(M5953)HALLMARK KRAS SIGNALING UP	0.0	1.0	1.0	0.0	0.0	1.0	1.0	0.0	0.0	1.0	1.0	1.0	0.0	0.0	0.0	0.0	0.0	0.0	1.0	0.0
ASCL1	429	symbol	H. sapiens	429	H. sapiens	ASCL1	achaete-scute family bHLH transcription factor 1	GO:0003359 noradrenergic neuron fate commitment;GO:0007400 neuroblast fate determination;GO:0014017 neuroblast fate commitment		Transcription factors:Basic domains; Human disease related genes:Nervous system diseases:Other nervous and sensory system diseases; Predicted intracellular proteins	Nucleoplasm (Approved); Additional: Cytosol		(M288)PID HES HEY PATHWAY	(M5907)HALLMARK ESTROGEN RESPONSE LATE	0.0	0.0	0.0	0.0	1.0	0.0	0.0	0.0	0.0	0.0	0.0	0.0	0.0	0.0	0.0	0.0	0.0	0.0	0.0	0.0
TRIML2	205860	symbol	H. sapiens	205860	H. sapiens	TRIML2	tripartite motif family like 2	GO:0046596 regulation of viral entry into host cell;GO:0052372 modulation by symbiont of entry into host;GO:0043903 regulation of biological process involved in symbiotic interaction		ENZYME proteins:Transferases; Predicted intracellular proteins; Enzymes	Cytosol;Plasma membrane (Approved)				0.0	0.0	0.0	0.0	0.0	0.0	0.0	0.0	0.0	0.0	0.0	0.0	0.0	0.0	0.0	0.0	0.0	0.0	0.0	0.0
TBX21	30009	symbol	H. sapiens	30009	H. sapiens	TBX21	T-box transcription factor 21	GO:2000329 negative regulation of T-helper 17 cell lineage commitment;GO:2000552 negative regulation of T-helper 2 cell cytokine production;GO:0002296 T-helper 1 cell lineage commitment		Disease related genes; Transcription factors:Immunoglobulin fold; Predicted intracellular proteins; Human disease related genes:Immune system diseases:Allergies and autoimmune diseases			(M36)PID IL27 PATHWAY; (M290)PID IL12 STAT4 PATHWAY; (M60)PID NFAT TFPATHWAY		0.0	1.0	1.0	0.0	0.0	1.0	1.0	0.0	1.0	1.0	1.0	0.0	0.0	1.0	0.0	1.0	0.0	0.0	1.0	0.0
IGF2BP2-AS1	646600	symbol	H. sapiens	646600	H. sapiens	IGF2BP2-AS1	IGF2BP2 antisense RNA 1								0.0	0.0	0.0	0.0	0.0	0.0	0.0	0.0	0.0	0.0	0.0	0.0	0.0	0.0	0.0	0.0	0.0	0.0	0.0	0.0
LINC01010	154092	symbol	H. sapiens	154092	H. sapiens	LINC01010	long intergenic non-protein coding RNA 1010								0.0	0.0	0.0	0.0	0.0	0.0	0.0	0.0	0.0	0.0	0.0	0.0	0.0	0.0	0.0	0.0	0.0	0.0	0.0	0.0
TMEM63C	57156	symbol	H. sapiens	57156	H. sapiens	TMEM63C	transmembrane protein 63C	GO:0003094 glomerular filtration;GO:0097205 renal filtration;GO:0003014 renal system process		Predicted intracellular proteins; Transporters:Transporter channels and pores	Centrosome (Approved)				0.0	0.0	0.0	0.0	0.0	0.0	0.0	0.0	0.0	0.0	0.0	0.0	0.0	0.0	0.0	0.0	0.0	0.0	0.0	0.0
G0S2	50486	symbol	H. sapiens	50486	H. sapiens	G0S2	G0/G1 switch 2	GO:2001238 positive regulation of extrinsic apoptotic signaling pathway;GO:0097191 extrinsic apoptotic signaling pathway;GO:0120162 positive regulation of cold-induced thermogenesis		Predicted intracellular proteins				(M5935)HALLMARK FATTY ACID METABOLISM; (M5890)HALLMARK TNFA SIGNALING VIA NFKB; (M5953)HALLMARK KRAS SIGNALING UP	0.0	0.0	0.0	0.0	0.0	0.0	0.0	0.0	0.0	0.0	0.0	0.0	0.0	0.0	0.0	0.0	0.0	0.0	0.0	0.0
BMPER	168667	symbol	H. sapiens	168667	H. sapiens	BMPER	BMP binding endothelial regulator	GO:0002043 blood vessel endothelial cell proliferation involved in sprouting angiogenesis;GO:0007182 common-partner SMAD protein phosphorylation;GO:0042118 endothelial cell activation		Disease related genes; Predicted secreted proteins; Predicted intracellular proteins; Human disease related genes:Congenital malformations:Other congenital malformations			(M3008)NABA ECM GLYCOPROTEINS; (M5884)NABA CORE MATRISOME; (M5889)NABA MATRISOME		0.0	0.0	0.0	0.0	0.0	1.0	0.0	0.0	0.0	0.0	0.0	0.0	0.0	0.0	0.0	0.0	0.0	0.0	0.0	0.0
KSR2	283455	symbol	H. sapiens	283455	H. sapiens	KSR2	kinase suppressor of ras 2	GO:0120162 positive regulation of cold-induced thermogenesis;GO:0019722 calcium-mediated signaling;GO:0120161 regulation of cold-induced thermogenesis	TKL Ser/Thr protein kinase family	RAS pathway related proteins; Predicted intracellular proteins; ENZYME proteins:Transferases; Kinases:TKL Ser/Thr protein kinases; Enzymes					0.0	0.0	0.0	0.0	0.0	0.0	0.0	0.0	0.0	0.0	0.0	0.0	0.0	0.0	0.0	0.0	0.0	0.0	0.0	0.0
ITGAD	3681	symbol	H. sapiens	3681	H. sapiens	ITGAD	integrin subunit alpha D	GO:0034113 heterotypic cell-cell adhesion;GO:0033627 cell adhesion mediated by integrin;GO:0007229 integrin-mediated signaling pathway		CD markers			(M47)PID INTEGRIN CS PATHWAY; (M169)PID INTEGRIN2 PATHWAY		0.0	0.0	0.0	0.0	0.0	0.0	0.0	0.0	0.0	0.0	0.0	0.0	0.0	0.0	0.0	0.0	0.0	1.0	0.0	0.0
RP11-404F10.2						None	None	None	None	None	None	None	None	None	nan	nan	nan	nan	nan	nan	nan	nan	nan	nan	nan	nan	nan	nan	nan	nan	nan	nan	nan	nan
TCEB2P2	253665	gene_synonym	H. sapiens	253665	H. sapiens	ELOBP2	elongin B pseudogene 2								0.0	0.0	0.0	0.0	0.0	0.0	0.0	0.0	0.0	0.0	0.0	0.0	0.0	0.0	0.0	0.0	0.0	0.0	0.0	0.0
CXCL11	6373	symbol	H. sapiens	6373	H. sapiens	CXCL11	C-X-C motif chemokine ligand 11	GO:0010818 T cell chemotaxis;GO:0072678 T cell migration;GO:0051281 positive regulation of release of sequestered calcium ion into cytosol		Predicted secreted proteins; Human disease related genes:Immune system diseases:Allergies and autoimmune diseases			(M222)PID CXCR3 PATHWAY; (M5883)NABA SECRETED FACTORS; (M5885)NABA MATRISOME ASSOCIATED	(M5897)HALLMARK IL6 JAK STAT3 SIGNALING; (M5911)HALLMARK INTERFERON ALPHA RESPONSE; (M5890)HALLMARK TNFA SIGNALING VIA NFKB	1.0	0.0	1.0	1.0	0.0	0.0	0.0	0.0	0.0	0.0	0.0	0.0	1.0	0.0	1.0	0.0	0.0	0.0	0.0	0.0
MAN1C1	57134	symbol	H. sapiens	57134	H. sapiens	MAN1C1	mannosidase alpha class 1C member 1	GO:1904381 Golgi apparatus mannose trimming;GO:0036507 protein demannosylation;GO:0036508 protein alpha-1,2-demannosylation		Predicted intracellular proteins; Enzymes; ENZYME proteins:Hydrolases	Nucleoplasm;Vesicles (Uncertain)				0.0	0.0	0.0	0.0	0.0	0.0	0.0	0.0	0.0	0.0	0.0	0.0	0.0	0.0	0.0	0.0	0.0	0.0	0.0	0.0
MUC13	56667	symbol	H. sapiens	56667	H. sapiens	MUC13	mucin 13, cell surface associated	GO:0030277 maintenance of gastrointestinal epithelium;GO:0010669 epithelial structure maintenance;GO:0022600 digestive system process		Predicted secreted proteins			(M5880)NABA ECM AFFILIATED; (M5885)NABA MATRISOME ASSOCIATED; (M5889)NABA MATRISOME		1.0	0.0	0.0	0.0	0.0	0.0	0.0	0.0	0.0	0.0	0.0	0.0	0.0	0.0	0.0	0.0	0.0	0.0	0.0	1.0
FABP5P7	728641	symbol	H. sapiens	728641	H. sapiens	FABP5P7	fatty acid binding protein 5 pseudogene 7								0.0	0.0	0.0	0.0	0.0	0.0	0.0	0.0	0.0	0.0	0.0	0.0	0.0	0.0	0.0	0.0	0.0	0.0	0.0	0.0
SH3RF2	153769	symbol	H. sapiens	153769	H. sapiens	SH3RF2	SH3 domain containing ring finger 2	GO:0046329 negative regulation of JNK cascade;GO:0032873 negative regulation of stress-activated MAPK cascade;GO:0070303 negative regulation of stress-activated protein kinase signaling cascade		ENZYME proteins:Transferases; Predicted intracellular proteins; Enzymes	Nucleoplasm (Enhanced)				0.0	0.0	0.0	0.0	0.0	0.0	0.0	0.0	0.0	0.0	0.0	0.0	0.0	0.0	0.0	0.0	0.0	0.0	0.0	0.0
KRT16P1	729252	symbol	H. sapiens	729252	H. sapiens	KRT16P1	keratin 16 pseudogene 1								0.0	0.0	0.0	0.0	0.0	0.0	0.0	0.0	0.0	0.0	0.0	0.0	0.0	0.0	0.0	0.0	0.0	0.0	0.0	0.0
AF127936.5						None	None	None	None	None	None	None	None	None	nan	nan	nan	nan	nan	nan	nan	nan	nan	nan	nan	nan	nan	nan	nan	nan	nan	nan	nan	nan
CACNG6	59285	symbol	H. sapiens	59285	H. sapiens	CACNG6	calcium voltage-gated channel auxiliary subunit gamma 6	GO:1902514 regulation of calcium ion transmembrane transport via high voltage-gated calcium channel;GO:1903169 regulation of calcium ion transmembrane transport;GO:0070588 calcium ion transmembrane transport		Transporters:Accessory Factors Involved in Transport; FDA approved drug targets:Small molecule drugs	Nucleoli fibrillar center (Approved); Additional: Cytosol				0.0	0.0	0.0	0.0	0.0	0.0	0.0	0.0	0.0	0.0	0.0	0.0	0.0	0.0	0.0	0.0	0.0	0.0	0.0	0.0
RP11-497E19.1						None	None	None	None	None	None	None	None	None	nan	nan	nan	nan	nan	nan	nan	nan	nan	nan	nan	nan	nan	nan	nan	nan	nan	nan	nan	nan
RUFY4	285180	symbol	H. sapiens	285180	H. sapiens	RUFY4	RUN and FYVE domain containing 4	GO:0071353 cellular response to interleukin-4;GO:0070670 response to interleukin-4;GO:0000045 autophagosome assembly		Predicted intracellular proteins					0.0	0.0	1.0	0.0	0.0	0.0	0.0	0.0	0.0	0.0	0.0	0.0	0.0	0.0	0.0	0.0	0.0	0.0	0.0	0.0
RP11-169D4.2						None	None	None	None	None	None	None	None	None	nan	nan	nan	nan	nan	nan	nan	nan	nan	nan	nan	nan	nan	nan	nan	nan	nan	nan	nan	nan
LMO1	4004	symbol	H. sapiens	4004	H. sapiens	LMO1	LIM domain only 1	GO:0046013 regulation of T cell homeostatic proliferation;GO:0042129 regulation of T cell proliferation;GO:0050670 regulation of lymphocyte proliferation		Disease related genes; Cancer-related genes; Predicted intracellular proteins					0.0	0.0	0.0	0.0	0.0	0.0	0.0	0.0	1.0	0.0	0.0	0.0	0.0	0.0	0.0	0.0	0.0	0.0	0.0	0.0
GDNF	2668	symbol	H. sapiens	2668	H. sapiens	GDNF	glial cell derived neurotrophic factor	GO:0021784 postganglionic parasympathetic fiber development;GO:0061642 chemoattraction of axon;GO:2001260 regulation of semaphorin-plexin signaling pathway		Human disease related genes:Nervous system diseases:Other nervous and sensory system diseases; Human disease related genes:Congenital malformations:Congenital malformations of the digestive system; Predicted secreted proteins; Disease related genes; Predicted intracellular proteins; Cancer-related genes:Candidate cancer biomarkers	Vesicles (Approved); Additional: Nucleoplasm	Chondroitin sulfate	(M82)PID RET PATHWAY; (M142)PID AJDISS 2PATHWAY; (M5883)NABA SECRETED FACTORS	(M5956)HALLMARK KRAS SIGNALING DN	1.0	0.0	1.0	0.0	1.0	0.0	0.0	0.0	0.0	0.0	0.0	0.0	0.0	0.0	0.0	0.0	0.0	0.0	0.0	0.0
BPI	671	symbol	H. sapiens	671	H. sapiens	BPI	bactericidal permeability increasing protein	GO:0043031 negative regulation of macrophage activation;GO:0031663 lipopolysaccharide-mediated signaling pathway;GO:0032717 negative regulation of interleukin-8 production		Predicted intracellular proteins; Predicted secreted proteins; Transporters:Transporter channels and pores		Di-Stearoyl-3-Sn-Phosphatidylcholine			0.0	0.0	0.0	1.0	0.0	0.0	0.0	0.0	1.0	0.0	1.0	0.0	0.0	0.0	0.0	0.0	0.0	0.0	0.0	0.0
CTD-2547L24.4						None	None	None	None	None	None	None	None	None	nan	nan	nan	nan	nan	nan	nan	nan	nan	nan	nan	nan	nan	nan	nan	nan	nan	nan	nan	nan
F5	2153	symbol	H. sapiens	2153	H. sapiens	F5	coagulation factor V	GO:0032571 response to vitamin K;GO:0033273 response to vitamin;GO:0007584 response to nutrient		Predicted secreted proteins; Candidate cardiovascular disease genes; Disease related genes; Human disease related genes:Cardiovascular diseases:Vascular diseases; Human disease related genes:Cardiovascular diseases:Hematologic diseases; FDA approved drug targets:Biotech drugs	Golgi apparatus (Approved)	Drotrecogin alfa; Thrombomodulin Alfa; Thrombin; Protein C; Human thrombin; Thrombin alfa; Protein S human; Anti-inhibitor coagulant complex		(M5921)HALLMARK COMPLEMENT	0.0	0.0	0.0	0.0	0.0	0.0	0.0	0.0	0.0	0.0	0.0	0.0	0.0	0.0	0.0	0.0	0.0	0.0	1.0	0.0
PPP2R2C	5522	symbol	H. sapiens	5522	H. sapiens	PPP2R2C	protein phosphatase 2 regulatory subunit Bgamma	GO:0070262 peptidyl-serine dephosphorylation;GO:0006470 protein dephosphorylation;GO:0016311 dephosphorylation		Predicted intracellular proteins	Cytosol (Approved)			(M5915)HALLMARK APICAL JUNCTION	0.0	0.0	0.0	0.0	0.0	0.0	0.0	0.0	0.0	0.0	0.0	0.0	0.0	0.0	0.0	0.0	0.0	0.0	0.0	0.0
SFTPB	6439	symbol	H. sapiens	6439	H. sapiens	SFTPB	surfactant protein B	GO:0007585 respiratory gaseous exchange by respiratory system;GO:0006665 sphingolipid metabolic process;GO:0006643 membrane lipid metabolic process		Disease related genes; Human disease related genes:Respiratory diseases:Lung diseases; Predicted intracellular proteins; Predicted secreted proteins			(M5880)NABA ECM AFFILIATED; (M5885)NABA MATRISOME ASSOCIATED; (M5889)NABA MATRISOME		1.0	0.0	0.0	0.0	0.0	0.0	0.0	0.0	0.0	0.0	0.0	0.0	0.0	0.0	0.0	0.0	0.0	0.0	0.0	1.0
TMSB15A	11013	symbol	H. sapiens	11013	H. sapiens	TMSB15A	thymosin beta 15A	GO:0042989 sequestering of actin monomers;GO:0030837 negative regulation of actin filament polymerization;GO:0032507 maintenance of protein location in cell		Predicted intracellular proteins					0.0	0.0	0.0	0.0	1.0	0.0	0.0	0.0	0.0	0.0	0.0	0.0	0.0	0.0	0.0	0.0	0.0	0.0	0.0	0.0
LINC00519	161342	symbol	H. sapiens	161342	H. sapiens	LINC00519	long intergenic non-protein coding RNA 519								0.0	0.0	0.0	0.0	0.0	0.0	0.0	0.0	0.0	0.0	0.0	0.0	0.0	0.0	0.0	0.0	0.0	0.0	0.0	0.0
RP11-326C3.12						None	None	None	None	None	None	None	None	None	nan	nan	nan	nan	nan	nan	nan	nan	nan	nan	nan	nan	nan	nan	nan	nan	nan	nan	nan	nan
SCIN	85477	symbol	H. sapiens	85477	H. sapiens	SCIN	scinderin	GO:0045654 positive regulation of megakaryocyte differentiation;GO:0042989 sequestering of actin monomers;GO:0051014 actin filament severing		Predicted intracellular proteins	Plasma membrane (Approved); Additional: Cytosol				0.0	0.0	0.0	0.0	1.0	0.0	0.0	0.0	1.0	0.0	0.0	0.0	0.0	0.0	0.0	0.0	0.0	0.0	0.0	0.0
TRGV5	6978	symbol	H. sapiens	6978	H. sapiens	TRGV5	T cell receptor gamma variable 5	GO:0002250 adaptive immune response;GO:0045087 innate immune response;GO:0098542 defense response to other organism		Predicted intracellular proteins					0.0	1.0	0.0	0.0	0.0	0.0	0.0	0.0	0.0	0.0	0.0	0.0	0.0	0.0	0.0	0.0	0.0	0.0	0.0	0.0
CTD-2224J9.8						None	None	None	None	None	None	None	None	None	nan	nan	nan	nan	nan	nan	nan	nan	nan	nan	nan	nan	nan	nan	nan	nan	nan	nan	nan	nan
RP11-353N14.1						None	None	None	None	None	None	None	None	None	nan	nan	nan	nan	nan	nan	nan	nan	nan	nan	nan	nan	nan	nan	nan	nan	nan	nan	nan	nan
LINC01287	103724390	symbol	H. sapiens	103724390	H. sapiens	LINC01287	long intergenic non-protein coding RNA 1287								0.0	0.0	0.0	0.0	0.0	0.0	0.0	0.0	0.0	0.0	0.0	0.0	0.0	0.0	0.0	0.0	0.0	0.0	0.0	0.0
IL20RB	53833	symbol	H. sapiens	53833	H. sapiens	IL20RB	interleukin 20 receptor subunit beta	GO:0001808 negative regulation of type IV hypersensitivity;GO:0002884 negative regulation of hypersensitivity;GO:0001807 regulation of type IV hypersensitivity			Vesicles (Approved); Additional: Cytosol				0.0	0.0	1.0	0.0	0.0	0.0	1.0	0.0	1.0	0.0	1.0	1.0	0.0	1.0	0.0	0.0	0.0	0.0	0.0	0.0
KIAA1045						None	None	None	None	None	None	None	None	None	nan	nan	nan	nan	nan	nan	nan	nan	nan	nan	nan	nan	nan	nan	nan	nan	nan	nan	nan	nan
CTD-2078B5.2						None	None	None	None	None	None	None	None	None	nan	nan	nan	nan	nan	nan	nan	nan	nan	nan	nan	nan	nan	nan	nan	nan	nan	nan	nan	nan
PIK3CD-AS1	644997	symbol	H. sapiens	644997	H. sapiens	PIK3CD-AS1	PIK3CD antisense RNA 1								0.0	0.0	0.0	0.0	0.0	0.0	0.0	0.0	0.0	0.0	0.0	0.0	0.0	0.0	0.0	0.0	0.0	0.0	0.0	0.0
C4A	720	symbol	H. sapiens	720	H. sapiens	C4A	complement C4A (Rodgers blood group)	GO:2000427 positive regulation of apoptotic cell clearance;GO:2000425 regulation of apoptotic cell clearance;GO:0050766 positive regulation of phagocytosis		Blood group antigen proteins; Human disease related genes:Immune system diseases:Allergies and autoimmune diseases; Human disease related genes:Other diseases:Mental and behavioural disorders; Predicted secreted proteins; Disease related genes; Human disease related genes:Immune system diseases:Primary immunodeficiency; FDA approved drug targets:Biotech drugs					0.0	1.0	1.0	0.0	0.0	1.0	1.0	0.0	0.0	0.0	0.0	0.0	0.0	0.0	1.0	1.0	0.0	0.0	1.0	0.0
ACADL	33	symbol	H. sapiens	33	H. sapiens	ACADL	acyl-CoA dehydrogenase long chain	GO:0042413 carnitine catabolic process;GO:0019254 carnitine metabolic process, CoA-linked;GO:0006579 amino-acid betaine catabolic process		ENZYME proteins:Oxidoreductases; Predicted intracellular proteins; Enzymes				(M5935)HALLMARK FATTY ACID METABOLISM; (M5905)HALLMARK ADIPOGENESIS	0.0	0.0	0.0	0.0	0.0	0.0	0.0	0.0	0.0	0.0	0.0	0.0	0.0	0.0	0.0	0.0	0.0	0.0	0.0	0.0
G6PC	2538	gene_synonym	H. sapiens	2538	H. sapiens	G6PC1	glucose-6-phosphatase catalytic subunit 1	GO:0015712 hexose phosphate transport;GO:0015760 glucose-6-phosphate transport;GO:0005980 glycogen catabolic process		ENZYME proteins:Hydrolases; Disease related genes; Potential drug targets; Human disease related genes:Congenital disorders of metabolism:Congenital disorders of carbohydrate metabolism; Enzymes			(M106)PID HNF3B PATHWAY; (M136)PID FOXO PATHWAY	(M5934)HALLMARK XENOBIOTIC METABOLISM	0.0	0.0	0.0	0.0	0.0	0.0	0.0	0.0	0.0	0.0	0.0	0.0	0.0	0.0	0.0	0.0	0.0	0.0	0.0	0.0
GPR149	344758	symbol	H. sapiens	344758	H. sapiens	GPR149	G protein-coupled receptor 149	GO:0060280 negative regulation of ovulation;GO:0001546 preantral ovarian follicle growth;GO:0048162 multi-layer follicle stage		G-protein coupled receptors:GPCRs excl olfactory receptors					0.0	0.0	0.0	0.0	0.0	0.0	0.0	0.0	0.0	0.0	0.0	0.0	0.0	0.0	0.0	0.0	0.0	0.0	0.0	0.0
FGF5	2250	symbol	H. sapiens	2250	H. sapiens	FGF5	fibroblast growth factor 5	GO:0023019 signal transduction involved in regulation of gene expression;GO:0008543 fibroblast growth factor receptor signaling pathway;GO:0044344 cellular response to fibroblast growth factor stimulus		Disease related genes; Predicted secreted proteins; RAS pathway related proteins; Human disease related genes:Skin diseases:Skin and soft tissue diseases	Nucleoli fibrillar center (Supported); Additional: Cytosol;Nucleoplasm		(M5883)NABA SECRETED FACTORS; (M5885)NABA MATRISOME ASSOCIATED; (M5889)NABA MATRISOME		1.0	0.0	0.0	0.0	0.0	0.0	0.0	0.0	0.0	0.0	0.0	0.0	0.0	0.0	0.0	0.0	0.0	0.0	0.0	0.0
CD79A	973	symbol	H. sapiens	973	H. sapiens	CD79A	CD79a molecule	GO:0042100 B cell proliferation;GO:0046651 lymphocyte proliferation;GO:0032943 mononuclear cell proliferation		Cancer-related genes; CD markers; Disease related genes; Human disease related genes:Cancers:Cancers of haematopoietic and lymphoid tissues; Human disease related genes:Immune system diseases:Primary immunodeficiency; Predicted intracellular proteins			(M10)PID BCR 5PATHWAY	(M5950)HALLMARK ALLOGRAFT REJECTION	0.0	1.0	0.0	0.0	0.0	1.0	1.0	1.0	0.0	0.0	0.0	0.0	0.0	0.0	0.0	1.0	0.0	0.0	0.0	0.0
SCG2	7857	symbol	H. sapiens	7857	H. sapiens	SCG2	secretogranin II	GO:0050930 induction of positive chemotaxis;GO:0048245 eosinophil chemotaxis;GO:0072677 eosinophil migration		Predicted secreted proteins	Golgi apparatus (Approved); Additional: Vesicles			(M5919)HALLMARK HEDGEHOG SIGNALING; (M5930)HALLMARK EPITHELIAL MESENCHYMAL TRANSITION	0.0	0.0	1.0	0.0	0.0	0.0	0.0	0.0	1.0	1.0	0.0	0.0	0.0	0.0	0.0	0.0	0.0	0.0	0.0	0.0
RP11-663N22.1						None	None	None	None	None	None	None	None	None	nan	nan	nan	nan	nan	nan	nan	nan	nan	nan	nan	nan	nan	nan	nan	nan	nan	nan	nan	nan
SSX1	6756	symbol	H. sapiens	6756	H. sapiens	SSX1	SSX family member 1	GO:0000122 negative regulation of transcription by RNA polymerase II;GO:0045892 negative regulation of transcription, DNA-templated;GO:1903507 negative regulation of nucleic acid-templated transcription		Disease related genes; Cancer-related genes; Human disease related genes:Cancers:Cancers of soft tissues and bone; Predicted intracellular proteins	Nucleoli;Nucleoplasm (Approved)				0.0	0.0	0.0	0.0	0.0	0.0	0.0	0.0	0.0	0.0	0.0	0.0	0.0	0.0	0.0	0.0	0.0	0.0	0.0	0.0
AP000476.1						None	None	None	None	None	None	None	None	None	nan	nan	nan	nan	nan	nan	nan	nan	nan	nan	nan	nan	nan	nan	nan	nan	nan	nan	nan	nan
SBK1	388228	symbol	H. sapiens	388228	H. sapiens	SBK1	SH3 domain binding kinase 1	GO:0018107 peptidyl-threonine phosphorylation;GO:0018210 peptidyl-threonine modification;GO:0018105 peptidyl-serine phosphorylation	Other	ENZYME proteins:Transferases; Kinases; Enzymes		Fostamatinib			0.0	0.0	0.0	0.0	0.0	0.0	0.0	0.0	0.0	0.0	0.0	0.0	0.0	0.0	0.0	0.0	0.0	0.0	0.0	0.0
RGMA	56963	symbol	H. sapiens	56963	H. sapiens	RGMA	repulsive guidance molecule BMP co-receptor a	GO:1900121 negative regulation of receptor binding;GO:0048681 negative regulation of axon regeneration;GO:0070571 negative regulation of neuron projection regeneration		Predicted intracellular proteins; Predicted secreted proteins	Nucleoplasm (Approved); Additional: Cytosol		(M181)PID BMP PATHWAY		0.0	0.0	0.0	0.0	0.0	0.0	0.0	0.0	0.0	0.0	0.0	1.0	0.0	0.0	0.0	0.0	0.0	0.0	0.0	0.0
MMP1	4312	symbol	H. sapiens	4312	H. sapiens	MMP1	matrix metallopeptidase 1	GO:0071492 cellular response to UV-A;GO:0070141 response to UV-A;GO:0030574 collagen catabolic process		ENZYME proteins:Hydrolases; Enzymes; Human disease related genes:Respiratory diseases:Lung diseases; Predicted secreted proteins; Candidate cardiovascular disease genes; Peptidases:Metallopeptidases; Human disease related genes:Cancers:Cancers of the breast and female genital organs; Cancer-related genes:Candidate cancer biomarkers	Vesicles (Approved)	Marimastat; CGS-27023; N-[3-(N'-HYDROXYCARBOXAMIDO)-2-(2-METHYLPROPYL)-PROPANOYL]-O-TYROSINE-N-METHYLAMIDE; METHYLAMINO-PHENYLALANYL-LEUCYL-HYDROXAMIC ACID; [[1-[N-HYDROXY-ACETAMIDYL]-3-METHYL-BUTYL]-CARBONYL-LEUCINYL]-ALANINE ETHYL ESTER; N-HYDROXY-2-[4-(4-PHENOXY-BENZENESULFONYL)-TETRAHYDRO-PYRAN-4-YL]-ACETAMIDE	(M65)PID FRA PATHWAY; (M198)PID SYNDECAN 1 PATHWAY; (M8)PID ENDOTHELIN PATHWAY	(M5946)HALLMARK COAGULATION; (M5930)HALLMARK EPITHELIAL MESENCHYMAL TRANSITION	1.0	0.0	1.0	0.0	0.0	0.0	0.0	0.0	0.0	0.0	0.0	0.0	0.0	0.0	0.0	0.0	0.0	0.0	0.0	0.0
CCL24	6369	symbol	H. sapiens	6369	H. sapiens	CCL24	C-C motif chemokine ligand 24	GO:2000418 positive regulation of eosinophil migration;GO:2000416 regulation of eosinophil migration;GO:0048245 eosinophil chemotaxis		Predicted secreted proteins			(M5883)NABA SECRETED FACTORS; (M5885)NABA MATRISOME ASSOCIATED; (M5889)NABA MATRISOME	(M5932)HALLMARK INFLAMMATORY RESPONSE	1.0	0.0	1.0	0.0	0.0	0.0	0.0	0.0	0.0	1.0	0.0	1.0	0.0	0.0	0.0	0.0	0.0	0.0	0.0	0.0
CTD-3105H18.7						None	None	None	None	None	None	None	None	None	nan	nan	nan	nan	nan	nan	nan	nan	nan	nan	nan	nan	nan	nan	nan	nan	nan	nan	nan	nan
TRGC2	6967	symbol	H. sapiens	6967	H. sapiens	TRGC2	T cell receptor gamma constant 2	GO:0046629 gamma-delta T cell activation;GO:0050852 T cell receptor signaling pathway;GO:0050851 antigen receptor-mediated signaling pathway							0.0	1.0	0.0	0.0	0.0	1.0	1.0	0.0	0.0	0.0	0.0	0.0	0.0	0.0	0.0	0.0	0.0	0.0	0.0	0.0
GZMB	3002	symbol	H. sapiens	3002	H. sapiens	GZMB	granzyme B	GO:1900739 regulation of protein insertion into mitochondrial membrane involved in apoptotic signaling pathway;GO:1900740 positive regulation of protein insertion into mitochondrial membrane involved in apoptotic signaling pathway;GO:0140507 granzyme-mediated programmed cell death signaling pathway		Peptidases:Serine-type peptidases; ENZYME proteins:Hydrolases; Enzymes; Predicted secreted proteins; Predicted intracellular proteins			(M7997)SA CASPASE CASCADE; (M220)PID CASPASE PATHWAY; (M54)PID IL12 2PATHWAY	(M5921)HALLMARK COMPLEMENT; (M5950)HALLMARK ALLOGRAFT REJECTION	0.0	0.0	0.0	0.0	0.0	1.0	0.0	0.0	0.0	0.0	0.0	0.0	0.0	0.0	0.0	0.0	0.0	0.0	1.0	0.0
RP13-726E6.2						None	None	None	None	None	None	None	None	None	nan	nan	nan	nan	nan	nan	nan	nan	nan	nan	nan	nan	nan	nan	nan	nan	nan	nan	nan	nan
KLRD1	3824	symbol	H. sapiens	3824	H. sapiens	KLRD1	killer cell lectin like receptor D1	GO:0001915 negative regulation of T cell mediated cytotoxicity;GO:0045953 negative regulation of natural killer cell mediated cytotoxicity;GO:0002716 negative regulation of natural killer cell mediated immunity		Predicted intracellular proteins; CD markers				(M5950)HALLMARK ALLOGRAFT REJECTION	0.0	1.0	0.0	0.0	0.0	1.0	1.0	1.0	1.0	1.0	0.0	1.0	0.0	1.0	0.0	0.0	0.0	0.0	1.0	0.0
LINC00563	100861554	symbol	H. sapiens	100861554	H. sapiens	LINC00563	long intergenic non-protein coding RNA 563								0.0	0.0	0.0	0.0	0.0	0.0	0.0	0.0	0.0	0.0	0.0	0.0	0.0	0.0	0.0	0.0	0.0	0.0	0.0	0.0
IL21R-AS1	283888	symbol	H. sapiens	283888	H. sapiens	IL21R-AS1	IL21R antisense RNA 1								0.0	0.0	0.0	0.0	0.0	0.0	0.0	0.0	0.0	0.0	0.0	0.0	0.0	0.0	0.0	0.0	0.0	0.0	0.0	0.0
SLC38A5	92745	symbol	H. sapiens	92745	H. sapiens	SLC38A5	solute carrier family 38 member 5	GO:1903713 asparagine transmembrane transport;GO:0006867 asparagine transport;GO:1904557 L-alanine transmembrane transport		Transporters:Electrochemical Potential-driven transporters	Plasma membrane;Vesicles (Approved); Additional: Cytosol				0.0	0.0	0.0	0.0	0.0	0.0	0.0	0.0	0.0	0.0	0.0	0.0	0.0	0.0	0.0	0.0	0.0	0.0	0.0	0.0
SLC12A3	6559	symbol	H. sapiens	6559	H. sapiens	SLC12A3	solute carrier family 12 member 3	GO:0055064 chloride ion homeostasis;GO:0055083 monovalent inorganic anion homeostasis;GO:0006884 cell volume homeostasis		Disease related genes; Human disease related genes:Endocrine and metabolic diseases:Other endocrine and metabolic diseases; FDA approved drug targets:Small molecule drugs; Transporters:Electrochemical Potential-driven transporters		Bendroflumethiazide; Metolazone; Benzthiazide; Indapamide; Chlorothiazide; Hydrochlorothiazide; Trichlormethiazide; Polythiazide; Quinethazone		(M5956)HALLMARK KRAS SIGNALING DN	0.0	0.0	0.0	0.0	0.0	0.0	0.0	0.0	0.0	0.0	0.0	0.0	0.0	0.0	0.0	0.0	0.0	0.0	0.0	0.0
CDX1	1044	symbol	H. sapiens	1044	H. sapiens	CDX1	caudal type homeobox 1	GO:0014807 regulation of somitogenesis;GO:0009948 anterior/posterior axis specification;GO:0009798 axis specification		Transcription factors:Helix-turn-helix domains; Predicted intracellular proteins			(M223)PID BETA CATENIN NUC PATHWAY		0.0	0.0	0.0	0.0	0.0	0.0	0.0	0.0	0.0	0.0	0.0	0.0	0.0	0.0	0.0	0.0	0.0	0.0	0.0	0.0
BLK	640	symbol	H. sapiens	640	H. sapiens	BLK	BLK proto-oncogene, Src family tyrosine kinase	GO:0070667 negative regulation of mast cell proliferation;GO:0070666 regulation of mast cell proliferation;GO:2000670 positive regulation of dendritic cell apoptotic process	Tyr protein kinase family	Predicted intracellular proteins; ENZYME proteins:Transferases; Human disease related genes:Endocrine and metabolic diseases:Diabetes; Disease related genes; Kinases:Tyr protein kinases; Potential drug targets; Enzymes; Cancer-related genes:Candidate cancer biomarkers	Nucleoplasm (Uncertain)	Fostamatinib; Zanubrutinib	(M33)PID GLYPICAN 1PATHWAY; (M76)PID P38 ALPHA BETA PATHWAY; (M257)PID EPHRINB REV PATHWAY		0.0	0.0	0.0	0.0	0.0	1.0	1.0	1.0	1.0	0.0	0.0	0.0	0.0	1.0	0.0	0.0	0.0	0.0	0.0	0.0
AMTN	401138	symbol	H. sapiens	401138	H. sapiens	AMTN	amelotin	GO:0070175 positive regulation of enamel mineralization;GO:0070173 regulation of enamel mineralization;GO:0070172 positive regulation of tooth mineralization		Disease related genes; Human disease related genes:Digestive system diseases:Mouth and dental diseases; Predicted secreted proteins					0.0	0.0	0.0	0.0	0.0	0.0	0.0	0.0	0.0	0.0	0.0	0.0	0.0	0.0	0.0	0.0	0.0	0.0	0.0	0.0
RP11-214O1.2						None	None	None	None	None	None	None	None	None	nan	nan	nan	nan	nan	nan	nan	nan	nan	nan	nan	nan	nan	nan	nan	nan	nan	nan	nan	nan
RP11-4B16.3						None	None	None	None	None	None	None	None	None	nan	nan	nan	nan	nan	nan	nan	nan	nan	nan	nan	nan	nan	nan	nan	nan	nan	nan	nan	nan
PKD1L1	168507	symbol	H. sapiens	168507	H. sapiens	PKD1L1	polycystin 1 like 1, transient receptor potential channel interacting	GO:0003127 detection of nodal flow;GO:0009726 detection of endogenous stimulus;GO:0070986 left/right axis specification		Disease related genes; Human disease related genes:Congenital malformations:Other congenital malformations; Transporters:Transporter channels and pores; Potential drug targets					0.0	0.0	0.0	0.0	0.0	0.0	0.0	0.0	0.0	0.0	0.0	0.0	0.0	0.0	0.0	0.0	0.0	1.0	0.0	0.0
HSPB3	8988	symbol	H. sapiens	8988	H. sapiens	HSPB3	heat shock protein family B (small) member 3	GO:0006986 response to unfolded protein;GO:0035966 response to topologically incorrect protein;GO:0010033 response to organic substance		Disease related genes; Human disease related genes:Nervous system diseases:Neurodegenerative diseases; Predicted intracellular proteins	Nuclear speckles (Supported)				0.0	0.0	0.0	0.0	0.0	0.0	0.0	0.0	0.0	0.0	0.0	0.0	0.0	0.0	0.0	0.0	0.0	0.0	0.0	0.0
ESPNL	339768	symbol	H. sapiens	339768	H. sapiens	ESPNL	espin like	GO:0051017 actin filament bundle assembly;GO:0061572 actin filament bundle organization;GO:0007605 sensory perception of sound		Predicted intracellular proteins					0.0	0.0	0.0	0.0	1.0	0.0	0.0	0.0	0.0	0.0	0.0	0.0	0.0	0.0	0.0	0.0	0.0	0.0	0.0	0.0
CLEC17A	388512	symbol	H. sapiens	388512	H. sapiens	CLEC17A	C-type lectin domain containing 17A	GO:0044419 biological process involved in interspecies interaction between organisms;GO:0008150 biological_process					(M5880)NABA ECM AFFILIATED; (M5885)NABA MATRISOME ASSOCIATED; (M5889)NABA MATRISOME		1.0	0.0	0.0	0.0	0.0	0.0	0.0	0.0	0.0	0.0	0.0	0.0	0.0	0.0	0.0	0.0	0.0	0.0	0.0	1.0
WNT10B	7480	symbol	H. sapiens	7480	H. sapiens	WNT10B	Wnt family member 10B	GO:0014835 myoblast differentiation involved in skeletal muscle regeneration;GO:0051885 positive regulation of timing of anagen;GO:0051884 regulation of timing of anagen		Disease related genes; Predicted secreted proteins; Human disease related genes:Digestive system diseases:Mouth and dental diseases; Human disease related genes:Congenital malformations:Congenital malformations of the musculoskeletal system	Golgi apparatus (Approved)		(M5883)NABA SECRETED FACTORS; (M5885)NABA MATRISOME ASSOCIATED; (M5889)NABA MATRISOME		1.0	0.0	0.0	1.0	0.0	1.0	0.0	0.0	1.0	0.0	0.0	0.0	1.0	0.0	0.0	0.0	0.0	0.0	0.0	0.0
CXCL12	6387	symbol	H. sapiens	6387	H. sapiens	CXCL12	C-X-C motif chemokine ligand 12	GO:1990478 response to ultrasound;GO:1903237 negative regulation of leukocyte tethering or rolling;GO:0033603 positive regulation of dopamine secretion		Predicted secreted proteins		CTCE-0214; Tinzaparin	(M165)PID SYNDECAN 4 PATHWAY; (M255)PID HIF1 TFPATHWAY; (M124)PID CXCR4 PATHWAY	(M5906)HALLMARK ESTROGEN RESPONSE EARLY; (M5907)HALLMARK ESTROGEN RESPONSE LATE; (M5930)HALLMARK EPITHELIAL MESENCHYMAL TRANSITION	1.0	0.0	1.0	0.0	0.0	0.0	0.0	0.0	1.0	1.0	0.0	0.0	1.0	0.0	0.0	1.0	0.0	0.0	0.0	0.0
TRIM10	10107	symbol	H. sapiens	10107	H. sapiens	TRIM10	tripartite motif containing 10	GO:0046597 negative regulation of viral entry into host cell;GO:1903901 negative regulation of viral life cycle;GO:0046596 regulation of viral entry into host cell		Predicted intracellular proteins				(M5945)HALLMARK HEME METABOLISM	0.0	0.0	1.0	0.0	0.0	1.0	0.0	0.0	0.0	0.0	0.0	0.0	0.0	0.0	0.0	0.0	0.0	0.0	0.0	0.0
AC015849.16						None	None	None	None	None	None	None	None	None	nan	nan	nan	nan	nan	nan	nan	nan	nan	nan	nan	nan	nan	nan	nan	nan	nan	nan	nan	nan
TWIST2	117581	symbol	H. sapiens	117581	H. sapiens	TWIST2	twist family bHLH transcription factor 2	GO:0045668 negative regulation of osteoblast differentiation;GO:0045667 regulation of osteoblast differentiation;GO:0030335 positive regulation of cell migration		Human disease related genes:Congenital malformations:Other congenital malformations; Transcription factors:Basic domains; Human disease related genes:Congenital malformations:Congenital malformations of skin; Disease related genes; Predicted intracellular proteins	Nucleoplasm (Supported); Additional: Nucleoli				0.0	0.0	0.0	0.0	0.0	0.0	0.0	0.0	0.0	0.0	0.0	0.0	0.0	0.0	0.0	0.0	0.0	0.0	0.0	0.0
RBMS3-AS3	100873979	symbol	H. sapiens	100873979	H. sapiens	RBMS3-AS3	RBMS3 antisense RNA 3								0.0	0.0	0.0	0.0	0.0	0.0	0.0	0.0	0.0	0.0	0.0	0.0	0.0	0.0	0.0	0.0	0.0	0.0	0.0	0.0
ZNF676	163223	symbol	H. sapiens	163223	H. sapiens	ZNF676	zinc finger protein 676	GO:0006357 regulation of transcription by RNA polymerase II;GO:0006355 regulation of transcription, DNA-templated;GO:1903506 regulation of nucleic acid-templated transcription		Transcription factors:Zinc-coordinating DNA-binding domains; Predicted intracellular proteins					0.0	0.0	0.0	0.0	0.0	0.0	0.0	0.0	0.0	0.0	0.0	0.0	0.0	0.0	0.0	0.0	0.0	0.0	0.0	0.0
PENK	5179	symbol	H. sapiens	5179	H. sapiens	PENK	proenkephalin	GO:0051867 general adaptation syndrome, behavioral process;GO:0099538 synaptic signaling via neuropeptide;GO:0051866 general adaptation syndrome		Predicted secreted proteins; Transporters:Transporter channels and pores			(M167)PID AP1 PATHWAY	(M5947)HALLMARK IL2 STAT5 SIGNALING	0.0	0.0	0.0	1.0	0.0	0.0	0.0	0.0	0.0	1.0	0.0	1.0	1.0	0.0	0.0	0.0	0.0	0.0	0.0	0.0
RP11-661D19.1						None	None	None	None	None	None	None	None	None	nan	nan	nan	nan	nan	nan	nan	nan	nan	nan	nan	nan	nan	nan	nan	nan	nan	nan	nan	nan
AC010091.1						None	None	None	None	None	None	None	None	None	nan	nan	nan	nan	nan	nan	nan	nan	nan	nan	nan	nan	nan	nan	nan	nan	nan	nan	nan	nan
SEZ6	124925	symbol	H. sapiens	124925	H. sapiens	SEZ6	seizure related 6 homolog	GO:0060074 synapse maturation;GO:0090036 regulation of protein kinase C signaling;GO:0021680 cerebellar Purkinje cell layer development		Predicted intracellular proteins					0.0	0.0	0.0	0.0	0.0	0.0	0.0	0.0	0.0	0.0	0.0	0.0	0.0	0.0	0.0	0.0	0.0	0.0	0.0	0.0
C11orf88	399949	gene_synonym	H. sapiens	399949	H. sapiens	HOATZ	HOATZ cilia and flagella associated protein	GO:0035082 axoneme assembly;GO:0030317 flagellated sperm motility;GO:0097722 sperm motility		Predicted intracellular proteins					0.0	0.0	0.0	0.0	0.0	0.0	0.0	0.0	0.0	0.0	0.0	0.0	0.0	0.0	0.0	0.0	0.0	0.0	0.0	0.0
TRBV5-6	28609	symbol	H. sapiens	28609	H. sapiens	TRBV5-6	T cell receptor beta variable 5-6	GO:0002250 adaptive immune response;GO:0006955 immune response;GO:0007166 cell surface receptor signaling pathway		Predicted intracellular proteins					0.0	1.0	0.0	0.0	0.0	0.0	0.0	0.0	0.0	0.0	0.0	0.0	0.0	0.0	0.0	0.0	0.0	0.0	0.0	0.0
CTB-105N12.2						None	None	None	None	None	None	None	None	None	nan	nan	nan	nan	nan	nan	nan	nan	nan	nan	nan	nan	nan	nan	nan	nan	nan	nan	nan	nan
TRBV25-1	28562	symbol	H. sapiens	28562	H. sapiens	TRBV25-1	T cell receptor beta variable 25-1	GO:0002250 adaptive immune response;GO:0006955 immune response;GO:0007166 cell surface receptor signaling pathway		Predicted intracellular proteins					0.0	1.0	0.0	0.0	0.0	0.0	0.0	0.0	0.0	0.0	0.0	0.0	0.0	0.0	0.0	0.0	0.0	0.0	0.0	0.0
IGHD	3495	symbol	H. sapiens	3495	H. sapiens	IGHD	immunoglobulin heavy constant delta	GO:0032732 positive regulation of interleukin-1 production;GO:0006910 phagocytosis, recognition;GO:0006958 complement activation, classical pathway		Predicted intracellular proteins; Predicted secreted proteins					0.0	1.0	0.0	1.0	0.0	1.0	1.0	0.0	1.0	0.0	1.0	0.0	0.0	0.0	1.0	0.0	0.0	0.0	1.0	0.0
HEPHL1	341208	symbol	H. sapiens	341208	H. sapiens	HEPHL1	hephaestin like 1	GO:0006825 copper ion transport;GO:0006826 iron ion transport;GO:0006879 cellular iron ion homeostasis		Disease related genes; ENZYME proteins:Oxidoreductases; Potential drug targets; Enzymes; Transporters:Accessory Factors Involved in Transport		Copper			0.0	0.0	0.0	0.0	0.0	0.0	0.0	0.0	0.0	0.0	0.0	0.0	0.0	0.0	0.0	0.0	0.0	0.0	0.0	0.0
KRT17P2	339241	symbol	H. sapiens	339241	H. sapiens	KRT17P2	keratin 17 pseudogene 2								0.0	0.0	0.0	0.0	0.0	0.0	0.0	0.0	0.0	0.0	0.0	0.0	0.0	0.0	0.0	0.0	0.0	0.0	0.0	0.0
bP-2189O9.2						None	None	None	None	None	None	None	None	None	nan	nan	nan	nan	nan	nan	nan	nan	nan	nan	nan	nan	nan	nan	nan	nan	nan	nan	nan	nan
CTB-167G5.7						None	None	None	None	None	None	None	None	None	nan	nan	nan	nan	nan	nan	nan	nan	nan	nan	nan	nan	nan	nan	nan	nan	nan	nan	nan	nan
TM4SF19-TCTEX1D2	100534611	gene_synonym	H. sapiens	100534611	H. sapiens	TM4SF19-DYNLT2B	TM4SF19-DYNLT2B readthrough (NMD candidate)								0.0	0.0	0.0	0.0	0.0	0.0	0.0	0.0	0.0	0.0	0.0	0.0	0.0	0.0	0.0	0.0	0.0	0.0	0.0	0.0
RP11-654D12.1						None	None	None	None	None	None	None	None	None	nan	nan	nan	nan	nan	nan	nan	nan	nan	nan	nan	nan	nan	nan	nan	nan	nan	nan	nan	nan
SERPINA5	5104	symbol	H. sapiens	5104	H. sapiens	SERPINA5	serpin family A member 5	GO:0007342 fusion of sperm to egg plasma membrane involved in single fertilization;GO:0045026 plasma membrane fusion;GO:0007009 plasma membrane organization		Predicted secreted proteins; Cancer-related genes:Candidate cancer biomarkers; Candidate cardiovascular disease genes		Urokinase; Drotrecogin alfa; Tifuvirtide; PPL-100	(M3468)NABA ECM REGULATORS; (M5885)NABA MATRISOME ASSOCIATED; (M5889)NABA MATRISOME	(M5944)HALLMARK ANGIOGENESIS; (M5907)HALLMARK ESTROGEN RESPONSE LATE	1.0	0.0	1.0	0.0	0.0	0.0	0.0	0.0	0.0	0.0	0.0	0.0	0.0	0.0	0.0	0.0	0.0	0.0	1.0	0.0
TINAG	27283	symbol	H. sapiens	27283	H. sapiens	TINAG	tubulointerstitial nephritis antigen	GO:0007155 cell adhesion;GO:0006508 proteolysis;GO:0019538 protein metabolic process		Predicted secreted proteins; Peptidases:Cysteine-type peptidases; Predicted intracellular proteins; Enzymes			(M3008)NABA ECM GLYCOPROTEINS; (M5884)NABA CORE MATRISOME; (M5889)NABA MATRISOME		0.0	0.0	0.0	0.0	0.0	0.0	0.0	0.0	0.0	0.0	0.0	0.0	0.0	0.0	0.0	0.0	0.0	0.0	0.0	0.0
RP11-374F3.5						None	None	None	None	None	None	None	None	None	nan	nan	nan	nan	nan	nan	nan	nan	nan	nan	nan	nan	nan	nan	nan	nan	nan	nan	nan	nan
CYMP	643160	symbol	H. sapiens	643160	H. sapiens	CYMP	chymosin, pseudogene								0.0	0.0	0.0	0.0	0.0	0.0	0.0	0.0	0.0	0.0	0.0	0.0	0.0	0.0	0.0	0.0	0.0	0.0	0.0	0.0
CD300E	342510	symbol	H. sapiens	342510	H. sapiens	CD300E	CD300e molecule	GO:0002376 immune system process;GO:0008150 biological_process		Predicted intracellular proteins; CD markers					0.0	0.0	0.0	0.0	0.0	0.0	0.0	1.0	0.0	0.0	0.0	0.0	0.0	0.0	0.0	0.0	0.0	0.0	0.0	0.0
FAM46B	115572	gene_synonym	H. sapiens	115572	H. sapiens	TENT5B	terminal nucleotidyltransferase 5B	GO:0048255 mRNA stabilization;GO:0043489 RNA stabilization;GO:1902373 negative regulation of mRNA catabolic process		Predicted intracellular proteins					0.0	0.0	0.0	0.0	0.0	0.0	0.0	0.0	1.0	0.0	0.0	0.0	0.0	0.0	0.0	0.0	0.0	0.0	0.0	0.0
SOST	50964	symbol	H. sapiens	50964	H. sapiens	SOST	sclerostin	GO:0071374 cellular response to parathyroid hormone stimulus;GO:0071107 response to parathyroid hormone;GO:0030279 negative regulation of ossification		Human disease related genes:Congenital malformations:Congenital malformations of the musculoskeletal system; Predicted secreted proteins; Human disease related genes:Musculoskeletal diseases:Skeletal diseases; Disease related genes; FDA approved drug targets:Biotech drugs		Romosozumab			0.0	0.0	0.0	0.0	0.0	0.0	0.0	0.0	0.0	0.0	0.0	0.0	0.0	0.0	0.0	0.0	0.0	0.0	0.0	0.0
CYP3A7	1551	symbol	H. sapiens	1551	H. sapiens	CYP3A7	cytochrome P450 family 3 subfamily A member 7	GO:0002933 lipid hydroxylation;GO:0070989 oxidative demethylation;GO:0042573 retinoic acid metabolic process		ENZYME proteins:Oxidoreductases; Enzymes	Cytosol (Approved); Additional: Vesicles	Cannabidiol; Nabiximols			0.0	0.0	0.0	0.0	0.0	0.0	0.0	0.0	0.0	0.0	0.0	0.0	0.0	0.0	0.0	0.0	0.0	0.0	0.0	0.0
RP11-439A17.10						None	None	None	None	None	None	None	None	None	nan	nan	nan	nan	nan	nan	nan	nan	nan	nan	nan	nan	nan	nan	nan	nan	nan	nan	nan	nan
RP11-222K16.2						None	None	None	None	None	None	None	None	None	nan	nan	nan	nan	nan	nan	nan	nan	nan	nan	nan	nan	nan	nan	nan	nan	nan	nan	nan	nan
CD22	933	symbol	H. sapiens	933	H. sapiens	CD22	CD22 molecule	GO:0050859 negative regulation of B cell receptor signaling pathway;GO:0002638 negative regulation of immunoglobulin production;GO:0050849 negative regulation of calcium-mediated signaling		Predicted intracellular proteins; FDA approved drug targets:Biotech drugs; CD markers		Epratuzumab; Inotuzumab ozogamicin; Moxetumomab Pasudotox	(M8626)SIG BCR SIGNALING PATHWAY; (M10)PID BCR 5PATHWAY		0.0	0.0	0.0	0.0	0.0	1.0	0.0	1.0	1.0	0.0	0.0	0.0	0.0	1.0	0.0	1.0	1.0	0.0	0.0	0.0
EFEMP1	2202	symbol	H. sapiens	2202	H. sapiens	EFEMP1	EGF containing fibulin extracellular matrix protein 1	GO:0048050 post-embryonic eye morphogenesis;GO:0048563 post-embryonic animal organ morphogenesis;GO:0009886 post-embryonic animal morphogenesis		Disease related genes; Predicted intracellular proteins; Predicted secreted proteins; Human disease related genes:Nervous system diseases:Eye disease	Mitochondria (Supported)		(M3008)NABA ECM GLYCOPROTEINS; (M5884)NABA CORE MATRISOME; (M5889)NABA MATRISOME	(M5942)HALLMARK UV RESPONSE DN	0.0	0.0	0.0	0.0	0.0	0.0	0.0	0.0	0.0	0.0	0.0	0.0	0.0	0.0	0.0	0.0	0.0	0.0	0.0	0.0
AADACP1	201651	symbol	H. sapiens	201651	H. sapiens	AADACP1	arylacetamide deacetylase pseudogene 1								0.0	0.0	0.0	0.0	0.0	0.0	0.0	0.0	0.0	0.0	0.0	0.0	0.0	0.0	0.0	0.0	0.0	0.0	0.0	0.0
HOXD11	3237	symbol	H. sapiens	3237	H. sapiens	HOXD11	homeobox D11	GO:0001658 branching involved in ureteric bud morphogenesis;GO:0060675 ureteric bud morphogenesis;GO:0072171 mesonephric tubule morphogenesis		Cancer-related genes; Transcription factors:Helix-turn-helix domains; Predicted intracellular proteins	Nucleoplasm (Supported)			(M5953)HALLMARK KRAS SIGNALING UP	0.0	0.0	0.0	0.0	0.0	0.0	0.0	0.0	0.0	0.0	0.0	0.0	0.0	0.0	0.0	0.0	0.0	0.0	0.0	0.0
TREM1	54210	symbol	H. sapiens	54210	H. sapiens	TREM1	triggering receptor expressed on myeloid cells 1	GO:0032602 chemokine production;GO:0002367 cytokine production involved in immune response;GO:0070945 neutrophil-mediated killing of gram-negative bacterium		Predicted secreted proteins; CD markers	Golgi apparatus (Approved)	D-tartaric acid			0.0	1.0	1.0	1.0	0.0	1.0	0.0	1.0	0.0	0.0	0.0	0.0	0.0	0.0	1.0	0.0	0.0	0.0	1.0	0.0
KRT31	3881	symbol	H. sapiens	3881	H. sapiens	KRT31	keratin 31	GO:0045109 intermediate filament organization;GO:0045104 intermediate filament cytoskeleton organization;GO:0045103 intermediate filament-based process		Predicted intracellular proteins				(M5915)HALLMARK APICAL JUNCTION	0.0	0.0	0.0	0.0	1.0	0.0	0.0	0.0	0.0	0.0	0.0	0.0	0.0	0.0	0.0	0.0	0.0	0.0	0.0	0.0
C7orf71	285941	gene_synonym	H. sapiens	285941	H. sapiens	LINC02860	long intergenic non-protein coding RNA 2860								0.0	0.0	0.0	0.0	0.0	0.0	0.0	0.0	0.0	0.0	0.0	0.0	0.0	0.0	0.0	0.0	0.0	0.0	0.0	0.0
TPSAB1	7177	symbol	H. sapiens	7177	H. sapiens	TPSAB1	tryptase alpha/beta 1	GO:0022617 extracellular matrix disassembly;GO:0030198 extracellular matrix organization;GO:0043062 extracellular structure organization		Peptidases:Serine-type peptidases; ENZYME proteins:Hydrolases; Predicted secreted proteins; Disease related genes; Potential drug targets; Enzymes		Amido Phenyl Pyruvic Acid; 4-PIPERIDIN-4-YLBUTANAL; [4-(3-AMINOMETHYL-PHENYL)-PIPERIDIN-1-YL]-(5-PHENETHYL- PYRIDIN-3-YL)-METHANONE; 1-(1'-{[3-(methylsulfanyl)-2-benzothiophen-1-yl]carbonyl}spiro[1-benzofuran-3,4'-piperidin]-5-yl)methanamine; 1-[1'-(3-phenylacryloyl)spiro[1-benzofuran-3,4'-piperidin]-5-yl]methanamine; JNJ-27390467		(M5907)HALLMARK ESTROGEN RESPONSE LATE	0.0	0.0	0.0	0.0	0.0	0.0	0.0	0.0	0.0	0.0	0.0	0.0	0.0	0.0	0.0	0.0	0.0	0.0	0.0	0.0
RP11-556E13.1						None	None	None	None	None	None	None	None	None	nan	nan	nan	nan	nan	nan	nan	nan	nan	nan	nan	nan	nan	nan	nan	nan	nan	nan	nan	nan
FCRL4	83417	symbol	H. sapiens	83417	H. sapiens	FCRL4	Fc receptor like 4	GO:0002250 adaptive immune response;GO:0006955 immune response;GO:0007166 cell surface receptor signaling pathway		Disease related genes; Cancer-related genes; CD markers					0.0	1.0	0.0	0.0	0.0	0.0	0.0	0.0	0.0	0.0	0.0	0.0	0.0	0.0	0.0	0.0	0.0	0.0	0.0	0.0
CCL8	6355	symbol	H. sapiens	6355	H. sapiens	CCL8	C-C motif chemokine ligand 8	GO:0044828 negative regulation by host of viral genome replication;GO:0044793 negative regulation by host of viral process;GO:0048245 eosinophil chemotaxis		Predicted secreted proteins; Cancer-related genes:Candidate cancer biomarkers		Pidolic acid	(M5883)NABA SECRETED FACTORS; (M5885)NABA MATRISOME ASSOCIATED; (M5889)NABA MATRISOME		1.0	0.0	1.0	0.0	0.0	0.0	0.0	0.0	1.0	0.0	0.0	0.0	0.0	0.0	0.0	0.0	0.0	0.0	0.0	0.0
RPRM	56475	symbol	H. sapiens	56475	H. sapiens	RPRM	reprimo, TP53 dependent G2 arrest mediator homolog	GO:0007346 regulation of mitotic cell cycle;GO:0051726 regulation of cell cycle;GO:0050794 regulation of cellular process							0.0	0.0	0.0	0.0	0.0	0.0	0.0	0.0	0.0	0.0	0.0	0.0	0.0	0.0	0.0	0.0	0.0	0.0	0.0	0.0
RGN	9104	symbol	H. sapiens	9104	H. sapiens	RGN	regucalcin	GO:1903011 negative regulation of bone development;GO:1903611 negative regulation of calcium-dependent ATPase activity;GO:1903627 regulation of dUTP diphosphatase activity		Predicted intracellular proteins; Enzymes; ENZYME proteins:Hydrolases	Cytosol (Approved)	Calcium citrate; Calcium Phosphate; Calcium phosphate dihydrate		(M5946)HALLMARK COAGULATION	0.0	0.0	0.0	0.0	0.0	0.0	0.0	0.0	1.0	0.0	0.0	0.0	0.0	0.0	0.0	0.0	0.0	0.0	0.0	0.0
GATA4	2626	symbol	H. sapiens	2626	H. sapiens	GATA4	GATA binding protein 4	GO:0003290 atrial septum secundum morphogenesis;GO:0035054 embryonic heart tube anterior/posterior pattern specification;GO:0003285 septum secundum development		Human disease related genes:Congenital malformations:Congenital malformations of the circulatory system; Human disease related genes:Cardiovascular diseases:Cardiac diseases; Disease related genes; Transcription factors:Zinc-coordinating DNA-binding domains; Predicted intracellular proteins	Nuclear bodies (Supported)		(M288)PID HES HEY PATHWAY		0.0	0.0	0.0	0.0	1.0	0.0	0.0	0.0	0.0	0.0	1.0	0.0	0.0	0.0	0.0	0.0	0.0	0.0	0.0	0.0
EPO	2056	symbol	H. sapiens	2056	H. sapiens	EPO	erythropoietin	GO:1902250 regulation of erythrocyte apoptotic process;GO:1902251 negative regulation of erythrocyte apoptotic process;GO:0010523 negative regulation of calcium ion transport into cytosol		Human disease related genes:Immune system diseases:Allergies and autoimmune diseases; Predicted secreted proteins; Human disease related genes:Nervous system diseases:Eye disease; Disease related genes; Candidate cardiovascular disease genes; Cancer-related genes:Candidate cancer biomarkers			(M233)PID EPO PATHWAY; (M44)PID HIF2PATHWAY; (M231)PID KIT PATHWAY		1.0	0.0	1.0	1.0	0.0	1.0	0.0	0.0	1.0	0.0	0.0	0.0	0.0	0.0	0.0	0.0	1.0	0.0	0.0	0.0
LINC01366	257358	symbol	H. sapiens	257358	H. sapiens	LINC01366	long intergenic non-protein coding RNA 1366								0.0	0.0	0.0	0.0	0.0	0.0	0.0	0.0	0.0	0.0	0.0	0.0	0.0	0.0	0.0	0.0	0.0	0.0	0.0	0.0
RIIAD1	284485	symbol	H. sapiens	284485	H. sapiens	RIIAD1	regulatory subunit of type II PKA R-subunit domain containing 1			Predicted intracellular proteins	Cytosol (Approved); Additional: Nucleoplasm				0.0	0.0	0.0	0.0	0.0	0.0	0.0	0.0	0.0	0.0	0.0	0.0	0.0	0.0	0.0	0.0	0.0	0.0	0.0	0.0
AC092580.4						None	None	None	None	None	None	None	None	None	nan	nan	nan	nan	nan	nan	nan	nan	nan	nan	nan	nan	nan	nan	nan	nan	nan	nan	nan	nan
FOXI2	399823	symbol	H. sapiens	399823	H. sapiens	FOXI2	forkhead box I2	GO:0009653 anatomical structure morphogenesis;GO:0006357 regulation of transcription by RNA polymerase II;GO:0030154 cell differentiation		Transcription factors:Helix-turn-helix domains; Predicted intracellular proteins					0.0	0.0	0.0	0.0	0.0	0.0	0.0	0.0	0.0	0.0	0.0	0.0	0.0	0.0	0.0	0.0	0.0	0.0	0.0	0.0
AC096558.1						None	None	None	None	None	None	None	None	None	nan	nan	nan	nan	nan	nan	nan	nan	nan	nan	nan	nan	nan	nan	nan	nan	nan	nan	nan	nan
TRAT1	50852	symbol	H. sapiens	50852	H. sapiens	TRAT1	T cell receptor associated transmembrane adaptor 1	GO:0001920 negative regulation of receptor recycling;GO:0050862 positive regulation of T cell receptor signaling pathway;GO:0001919 regulation of receptor recycling		Predicted intracellular proteins	Plasma membrane (Enhanced); Additional: Centriolar satellite;Mitotic spindle			(M5950)HALLMARK ALLOGRAFT REJECTION	0.0	1.0	0.0	0.0	0.0	0.0	1.0	1.0	0.0	0.0	0.0	0.0	0.0	0.0	0.0	0.0	0.0	0.0	0.0	0.0
CLEC10A	10462	symbol	H. sapiens	10462	H. sapiens	CLEC10A	C-type lectin domain containing 10A	GO:0006897 endocytosis;GO:0002250 adaptive immune response;GO:0045087 innate immune response		Predicted intracellular proteins; CD markers			(M5880)NABA ECM AFFILIATED; (M5885)NABA MATRISOME ASSOCIATED; (M5889)NABA MATRISOME		1.0	1.0	0.0	0.0	0.0	0.0	0.0	0.0	0.0	0.0	0.0	0.0	0.0	0.0	0.0	0.0	0.0	0.0	0.0	1.0
ECHDC3	79746	symbol	H. sapiens	79746	H. sapiens	ECHDC3	enoyl-CoA hydratase domain containing 3	GO:1900078 positive regulation of cellular response to insulin stimulus;GO:1900076 regulation of cellular response to insulin stimulus;GO:0006631 fatty acid metabolic process		Predicted intracellular proteins					0.0	0.0	0.0	0.0	0.0	0.0	0.0	0.0	0.0	0.0	0.0	0.0	0.0	0.0	0.0	0.0	0.0	0.0	0.0	0.0
BCAR4	400500	symbol	H. sapiens	400500	H. sapiens	BCAR4	breast cancer anti-estrogen resistance 4								0.0	0.0	0.0	0.0	0.0	0.0	0.0	0.0	0.0	0.0	0.0	0.0	0.0	0.0	0.0	0.0	0.0	0.0	0.0	0.0
ZFHX4	79776	symbol	H. sapiens	79776	H. sapiens	ZFHX4	zinc finger homeobox 4	GO:0006357 regulation of transcription by RNA polymerase II;GO:0006355 regulation of transcription, DNA-templated;GO:1903506 regulation of nucleic acid-templated transcription		Disease related genes; Transcription factors:Helix-turn-helix domains; Predicted intracellular proteins	Nucleoli fibrillar center;Nucleoplasm (Approved)				0.0	0.0	0.0	0.0	0.0	0.0	0.0	0.0	0.0	0.0	0.0	0.0	0.0	0.0	0.0	0.0	0.0	0.0	0.0	0.0
TUBA3C	7278	symbol	H. sapiens	7278	H. sapiens	TUBA3C	tubulin alpha 3c	GO:0000226 microtubule cytoskeleton organization;GO:0000278 mitotic cell cycle;GO:0007017 microtubule-based process		Predicted intracellular proteins	Microtubules (Supported)			(M5951)HALLMARK SPERMATOGENESIS	0.0	0.0	0.0	0.0	0.0	0.0	0.0	1.0	0.0	0.0	0.0	0.0	0.0	0.0	0.0	0.0	0.0	0.0	0.0	0.0
GZMK	3003	symbol	H. sapiens	3003	H. sapiens	GZMK	granzyme K	GO:0006508 proteolysis;GO:0019538 protein metabolic process;GO:1901564 organonitrogen compound metabolic process		Predicted secreted proteins; Peptidases:Serine-type peptidases; Enzymes				(M5921)HALLMARK COMPLEMENT	0.0	0.0	0.0	0.0	0.0	0.0	0.0	0.0	0.0	0.0	0.0	0.0	0.0	0.0	0.0	0.0	0.0	0.0	0.0	0.0
RP11-662I13.2						None	None	None	None	None	None	None	None	None	nan	nan	nan	nan	nan	nan	nan	nan	nan	nan	nan	nan	nan	nan	nan	nan	nan	nan	nan	nan
RP11-227H15.4						None	None	None	None	None	None	None	None	None	nan	nan	nan	nan	nan	nan	nan	nan	nan	nan	nan	nan	nan	nan	nan	nan	nan	nan	nan	nan
RP11-249L21.4						None	None	None	None	None	None	None	None	None	nan	nan	nan	nan	nan	nan	nan	nan	nan	nan	nan	nan	nan	nan	nan	nan	nan	nan	nan	nan
AC002454.1						None	None	None	None	None	None	None	None	None	nan	nan	nan	nan	nan	nan	nan	nan	nan	nan	nan	nan	nan	nan	nan	nan	nan	nan	nan	nan
LINC01426	100506385	symbol	H. sapiens	100506385	H. sapiens	LINC01426	long intergenic non-protein coding RNA 1426								0.0	0.0	0.0	0.0	0.0	0.0	0.0	0.0	0.0	0.0	0.0	0.0	0.0	0.0	0.0	0.0	0.0	0.0	0.0	0.0
ANPEP	290	symbol	H. sapiens	290	H. sapiens	ANPEP	alanyl aminopeptidase, membrane	GO:0043171 peptide catabolic process;GO:0046718 viral entry into host cell;GO:0044409 entry into host		Peptidases:Metallopeptidases; Enzymes; ENZYME proteins:Hydrolases; CD markers	Plasma membrane (Supported)	Ezetimibe; Icatibant	(M195)PID CMYB PATHWAY	(M5930)HALLMARK EPITHELIAL MESENCHYMAL TRANSITION	0.0	0.0	0.0	0.0	0.0	0.0	0.0	0.0	0.0	0.0	0.0	0.0	0.0	0.0	0.0	0.0	1.0	0.0	0.0	0.0
RP6-24A23.7						None	None	None	None	None	None	None	None	None	nan	nan	nan	nan	nan	nan	nan	nan	nan	nan	nan	nan	nan	nan	nan	nan	nan	nan	nan	nan
T	6862	gene_synonym	H. sapiens	6862	H. sapiens	TBXT	T-box transcription factor T	GO:0090009 primitive streak formation;GO:0007351 tripartite regional subdivision;GO:0008595 anterior/posterior axis specification, embryo		Disease related genes; Transcription factors:Immunoglobulin fold; Predicted intracellular proteins; Human disease related genes:Congenital malformations:Other congenital malformations	Nucleoplasm (Supported)		(M236)PID DELTA NP63 PATHWAY; (M223)PID BETA CATENIN NUC PATHWAY; (M5493)WNT SIGNALING		0.0	0.0	0.0	0.0	0.0	0.0	0.0	0.0	0.0	0.0	0.0	0.0	0.0	0.0	0.0	0.0	0.0	0.0	0.0	0.0
VCX3A	51481	symbol	H. sapiens	51481	H. sapiens	VCX3A	variable charge X-linked 3A	GO:0007420 brain development;GO:0060322 head development;GO:0007417 central nervous system development		Predicted intracellular proteins					0.0	0.0	0.0	0.0	0.0	0.0	0.0	0.0	0.0	0.0	0.0	0.0	0.0	0.0	0.0	0.0	0.0	0.0	0.0	0.0
CD19	930	symbol	H. sapiens	930	H. sapiens	CD19	CD19 molecule	GO:0001923 B-1 B cell differentiation;GO:0002322 B cell proliferation involved in immune response;GO:0050855 regulation of B cell receptor signaling pathway		Disease related genes; Human disease related genes:Immune system diseases:Primary immunodeficiency; FDA approved drug targets:Biotech drugs; CD markers		Coltuximab ravtansine; Blinatumomab; Inebilizumab; Tisagenlecleucel; Axicabtagene ciloleucel	(M1315)SIG PIP3 SIGNALING IN B LYMPHOCYTES; (M8626)SIG BCR SIGNALING PATHWAY; (M10)PID BCR 5PATHWAY		0.0	1.0	0.0	0.0	0.0	1.0	1.0	1.0	1.0	0.0	0.0	0.0	0.0	0.0	0.0	1.0	1.0	0.0	1.0	0.0
LINC01314	100996492	gene_synonym	H. sapiens	100996492	H. sapiens	CTXND1	cortexin domain containing 1								0.0	0.0	0.0	0.0	0.0	0.0	0.0	0.0	0.0	0.0	0.0	0.0	0.0	0.0	0.0	0.0	0.0	0.0	0.0	0.0
RP11-150O12.5						None	None	None	None	None	None	None	None	None	nan	nan	nan	nan	nan	nan	nan	nan	nan	nan	nan	nan	nan	nan	nan	nan	nan	nan	nan	nan
ERVH48-1	90625	symbol	H. sapiens	90625	H. sapiens	ERVH48-1	endogenous retrovirus group 48 member 1	GO:0006949 syncytium formation;GO:0048646 anatomical structure formation involved in morphogenesis;GO:0009653 anatomical structure morphogenesis		Predicted intracellular proteins; Predicted secreted proteins					0.0	0.0	0.0	0.0	0.0	0.0	0.0	0.0	0.0	0.0	0.0	0.0	0.0	0.0	0.0	0.0	0.0	0.0	0.0	0.0
WFDC12	128488	symbol	H. sapiens	128488	H. sapiens	WFDC12	WAP four-disulfide core domain 12	GO:0019731 antibacterial humoral response;GO:0019730 antimicrobial humoral response;GO:0010951 negative regulation of endopeptidase activity		Predicted secreted proteins					0.0	0.0	0.0	1.0	0.0	0.0	0.0	0.0	0.0	0.0	0.0	0.0	0.0	0.0	1.0	0.0	0.0	0.0	0.0	0.0
MT1M	4499	symbol	H. sapiens	4499	H. sapiens	MT1M	metallothionein 1M	GO:0010273 detoxification of copper ion;GO:1990169 stress response to copper ion;GO:0061687 detoxification of inorganic compound		Predicted intracellular proteins					0.0	0.0	0.0	0.0	0.0	0.0	0.0	0.0	0.0	0.0	0.0	0.0	0.0	0.0	0.0	0.0	0.0	0.0	0.0	0.0
TRMT112P3	729667	symbol	H. sapiens	729667	H. sapiens	TRMT112P3	tRNA methyltransferase subunit 11-2 pseudogene 3								0.0	0.0	0.0	0.0	0.0	0.0	0.0	0.0	0.0	0.0	0.0	0.0	0.0	0.0	0.0	0.0	0.0	0.0	0.0	0.0
FRMPD2	143162	symbol	H. sapiens	143162	H. sapiens	FRMPD2	FERM and PDZ domain containing 2	GO:0070830 bicellular tight junction assembly;GO:0120192 tight junction assembly;GO:0043297 apical junction assembly		Predicted intracellular proteins					0.0	0.0	0.0	0.0	0.0	0.0	0.0	0.0	0.0	0.0	0.0	0.0	0.0	0.0	0.0	0.0	0.0	0.0	0.0	0.0
TNFRSF13B	23495	symbol	H. sapiens	23495	H. sapiens	TNFRSF13B	TNF receptor superfamily member 13B	GO:0030889 negative regulation of B cell proliferation;GO:0001782 B cell homeostasis;GO:0050869 negative regulation of B cell activation		Disease related genes; Human disease related genes:Immune system diseases:Primary immunodeficiency; Predicted intracellular proteins; CD markers			(M165)PID SYNDECAN 4 PATHWAY; (M240)PID SYNDECAN 2 PATHWAY		0.0	1.0	1.0	0.0	0.0	1.0	0.0	0.0	1.0	0.0	0.0	0.0	0.0	0.0	0.0	1.0	0.0	0.0	0.0	0.0
SH2D1A	4068	symbol	H. sapiens	4068	H. sapiens	SH2D1A	SH2 domain containing 1A	GO:0050860 negative regulation of T cell receptor signaling pathway;GO:0045954 positive regulation of natural killer cell mediated cytotoxicity;GO:0002717 positive regulation of natural killer cell mediated immunity		Disease related genes; Human disease related genes:Immune system diseases:Primary immunodeficiency; Predicted intracellular proteins	Cytosol (Approved)		(M145)PID P53 DOWNSTREAM PATHWAY		0.0	1.0	0.0	0.0	0.0	0.0	1.0	1.0	1.0	1.0	0.0	1.0	0.0	1.0	1.0	0.0	0.0	0.0	0.0	0.0
TPRG1-AS1	100874043	symbol	H. sapiens	100874043	H. sapiens	TPRG1-AS1	TPRG1 antisense RNA 1								0.0	0.0	0.0	0.0	0.0	0.0	0.0	0.0	0.0	0.0	0.0	0.0	0.0	0.0	0.0	0.0	0.0	0.0	0.0	0.0
TRBV29-1	28558	symbol	H. sapiens	28558	H. sapiens	TRBV29-1	T cell receptor beta variable 29-1	GO:0002250 adaptive immune response;GO:0006955 immune response;GO:0007166 cell surface receptor signaling pathway		Predicted intracellular proteins					0.0	1.0	0.0	0.0	0.0	0.0	0.0	0.0	0.0	0.0	0.0	0.0	0.0	0.0	0.0	0.0	0.0	0.0	0.0	0.0
RP11-428G5.5						None	None	None	None	None	None	None	None	None	nan	nan	nan	nan	nan	nan	nan	nan	nan	nan	nan	nan	nan	nan	nan	nan	nan	nan	nan	nan
AC005102.1						None	None	None	None	None	None	None	None	None	nan	nan	nan	nan	nan	nan	nan	nan	nan	nan	nan	nan	nan	nan	nan	nan	nan	nan	nan	nan
SEPT3	55964	gene_synonym	H. sapiens	55964	H. sapiens	SEPTIN3	septin 3	GO:0061640 cytoskeleton-dependent cytokinesis;GO:0000910 cytokinesis;GO:0051301 cell division		Predicted intracellular proteins	Nucleoplasm;Plasma membrane (Approved); Additional: Actin filaments				0.0	0.0	0.0	0.0	0.0	0.0	0.0	0.0	0.0	0.0	0.0	0.0	0.0	0.0	0.0	0.0	0.0	0.0	0.0	0.0
MLNR	2862	symbol	H. sapiens	2862	H. sapiens	MLNR	motilin receptor	GO:0007186 G protein-coupled receptor signaling pathway;GO:0007165 signal transduction;GO:0023052 signaling		G-protein coupled receptors:GPCRs excl olfactory receptors	Cytosol;Plasma membrane (Approved)	Erythromycin; Mitemcinal			0.0	0.0	0.0	0.0	0.0	0.0	0.0	0.0	0.0	0.0	0.0	0.0	1.0	0.0	0.0	0.0	0.0	0.0	0.0	0.0
CTSG	1511	symbol	H. sapiens	1511	H. sapiens	CTSG	cathepsin G	GO:0098784 biofilm matrix organization;GO:0098786 biofilm matrix disassembly;GO:0070946 neutrophil-mediated killing of gram-positive bacterium		Peptidases:Serine-type peptidases; Predicted intracellular proteins; Enzymes; ENZYME proteins:Hydrolases		Bis-Napthyl Beta-Ketophosphonic Acid; 2-[3-({Methyl[1-(2-Naphthoyl)Piperidin-4-Yl]Amino}Carbonyl)-2-Naphthyl]-1-(1-Naphthyl)-2-Oxoethylphosphonic Acid	(M174)PID UPA UPAR PATHWAY; (M3468)NABA ECM REGULATORS; (M5885)NABA MATRISOME ASSOCIATED		1.0	0.0	1.0	1.0	0.0	1.0	1.0	0.0	1.0	0.0	0.0	0.0	1.0	0.0	1.0	0.0	0.0	0.0	1.0	0.0
AARD	441376	symbol	H. sapiens	441376	H. sapiens	AARD	alanine and arginine rich domain containing protein			Predicted intracellular proteins	Lipid droplets (Approved)				0.0	0.0	0.0	0.0	0.0	0.0	0.0	0.0	0.0	0.0	0.0	0.0	0.0	0.0	0.0	0.0	0.0	0.0	0.0	0.0
AC073284.4						None	None	None	None	None	None	None	None	None	nan	nan	nan	nan	nan	nan	nan	nan	nan	nan	nan	nan	nan	nan	nan	nan	nan	nan	nan	nan
LINC00524	338002	symbol	H. sapiens	338002	H. sapiens	LINC00524	long intergenic non-protein coding RNA 524								0.0	0.0	0.0	0.0	0.0	0.0	0.0	0.0	0.0	0.0	0.0	0.0	0.0	0.0	0.0	0.0	0.0	0.0	0.0	0.0
TRAV23DV6	28660	symbol	H. sapiens	28660	H. sapiens	TRAV23DV6	T cell receptor alpha variable 23/delta variable 6	GO:0002250 adaptive immune response;GO:0006955 immune response;GO:0002376 immune system process		Predicted intracellular proteins					0.0	1.0	0.0	0.0	0.0	0.0	0.0	0.0	0.0	0.0	0.0	0.0	0.0	0.0	0.0	0.0	0.0	0.0	0.0	0.0
CXCL9	4283	symbol	H. sapiens	4283	H. sapiens	CXCL9	C-X-C motif chemokine ligand 9	GO:1901741 positive regulation of myoblast fusion;GO:1901739 regulation of myoblast fusion;GO:0060143 positive regulation of syncytium formation by plasma membrane fusion		Predicted secreted proteins; Cancer-related genes:Candidate cancer biomarkers; Human disease related genes:Immune system diseases:Allergies and autoimmune diseases			(M196)PID IL23 PATHWAY; (M222)PID CXCR3 PATHWAY; (M5883)NABA SECRETED FACTORS	(M5897)HALLMARK IL6 JAK STAT3 SIGNALING; (M5913)HALLMARK INTERFERON GAMMA RESPONSE; (M5932)HALLMARK INFLAMMATORY RESPONSE	1.0	0.0	1.0	1.0	0.0	0.0	0.0	0.0	0.0	0.0	0.0	0.0	1.0	0.0	1.0	0.0	0.0	0.0	0.0	0.0
FLRT2	23768	symbol	H. sapiens	23768	H. sapiens	FLRT2	fibronectin leucine rich transmembrane protein 2	GO:0061343 cell adhesion involved in heart morphogenesis;GO:0071711 basement membrane organization;GO:2001222 regulation of neuron migration							0.0	0.0	1.0	0.0	0.0	0.0	0.0	0.0	0.0	0.0	0.0	0.0	0.0	0.0	0.0	0.0	0.0	0.0	0.0	0.0
TTLL11-IT1	158135	gene_synonym	H. sapiens	158135	H. sapiens	TTLL11	tubulin tyrosine ligase like 11	GO:0051013 microtubule severing;GO:0018095 protein polyglutamylation;GO:0018200 peptidyl-glutamic acid modification		Predicted intracellular proteins					0.0	0.0	0.0	0.0	0.0	0.0	0.0	0.0	0.0	0.0	0.0	0.0	0.0	0.0	0.0	0.0	0.0	0.0	0.0	0.0
RP11-960L18.1						None	None	None	None	None	None	None	None	None	nan	nan	nan	nan	nan	nan	nan	nan	nan	nan	nan	nan	nan	nan	nan	nan	nan	nan	nan	nan
LINC00892	100128420	symbol	H. sapiens	100128420	H. sapiens	LINC00892	long intergenic non-protein coding RNA 892								0.0	0.0	0.0	0.0	0.0	0.0	0.0	0.0	0.0	0.0	0.0	0.0	0.0	0.0	0.0	0.0	0.0	0.0	0.0	0.0
RP11-498P14.5						None	None	None	None	None	None	None	None	None	nan	nan	nan	nan	nan	nan	nan	nan	nan	nan	nan	nan	nan	nan	nan	nan	nan	nan	nan	nan
CHRNA9	55584	symbol	H. sapiens	55584	H. sapiens	CHRNA9	cholinergic receptor nicotinic alpha 9 subunit	GO:0050910 detection of mechanical stimulus involved in sensory perception of sound;GO:0010996 response to auditory stimulus;GO:0050974 detection of mechanical stimulus involved in sensory perception		Transporters:Transporter channels and pores		Nicotine; Ethanol; ATG003; Lobeline; RPI-78M; Tetraethylammonium			0.0	0.0	0.0	0.0	0.0	0.0	0.0	0.0	0.0	0.0	0.0	0.0	1.0	0.0	0.0	0.0	0.0	0.0	0.0	0.0
CDH17	1015	symbol	H. sapiens	1015	H. sapiens	CDH17	cadherin 17	GO:0033626 positive regulation of integrin activation by cell surface receptor linked signal transduction;GO:0002314 germinal center B cell differentiation;GO:0002315 marginal zone B cell differentiation		Predicted intracellular proteins; Cancer-related genes:Candidate cancer biomarkers	Cell Junctions (Supported); Additional: Nucleoplasm				0.0	0.0	0.0	0.0	0.0	1.0	0.0	0.0	0.0	0.0	0.0	0.0	0.0	0.0	0.0	0.0	0.0	1.0	0.0	0.0
HOXB-AS4	100874351	symbol	H. sapiens	100874351	H. sapiens	HOXB-AS4	HOXB cluster antisense RNA 4								0.0	0.0	0.0	0.0	0.0	0.0	0.0	0.0	0.0	0.0	0.0	0.0	0.0	0.0	0.0	0.0	0.0	0.0	0.0	0.0
GAP43	2596	symbol	H. sapiens	2596	H. sapiens	GAP43	growth associated protein 43	GO:0016198 axon choice point recognition;GO:0099150 regulation of postsynaptic specialization assembly;GO:0031103 axon regeneration		Predicted intracellular proteins; Transporters:Transporter channels and pores	Plasma membrane (Enhanced)		(M266)PID NCADHERIN PATHWAY		0.0	0.0	1.0	0.0	0.0	0.0	0.0	0.0	0.0	0.0	0.0	0.0	0.0	0.0	0.0	0.0	0.0	0.0	0.0	0.0
ELF5	2001	symbol	H. sapiens	2001	H. sapiens	ELF5	E74 like ETS transcription factor 5	GO:0006357 regulation of transcription by RNA polymerase II;GO:0030154 cell differentiation;GO:0048869 cellular developmental process		Transcription factors:Helix-turn-helix domains; Predicted intracellular proteins	Nucleoplasm (Approved)				0.0	0.0	0.0	0.0	0.0	0.0	0.0	0.0	0.0	0.0	0.0	0.0	0.0	0.0	0.0	0.0	0.0	0.0	0.0	0.0
BFSP2	8419	symbol	H. sapiens	8419	H. sapiens	BFSP2	beaded filament structural protein 2	GO:0070307 lens fiber cell development;GO:0070306 lens fiber cell differentiation;GO:0045109 intermediate filament organization		Disease related genes; Predicted intracellular proteins; Human disease related genes:Nervous system diseases:Eye disease	Cytosol;Plasma membrane (Uncertain)				0.0	0.0	0.0	0.0	1.0	0.0	0.0	0.0	0.0	0.0	0.0	0.0	0.0	0.0	0.0	0.0	0.0	0.0	0.0	0.0
RP11-59D5__B.2						None	None	None	None	None	None	None	None	None	nan	nan	nan	nan	nan	nan	nan	nan	nan	nan	nan	nan	nan	nan	nan	nan	nan	nan	nan	nan
SRPX	8406	symbol	H. sapiens	8406	H. sapiens	SRPX	sushi repeat containing protein X-linked	GO:0060244 negative regulation of cell proliferation involved in contact inhibition;GO:0060242 contact inhibition;GO:0060245 detection of cell density		Predicted secreted proteins			(M3008)NABA ECM GLYCOPROTEINS; (M5884)NABA CORE MATRISOME; (M5889)NABA MATRISOME	(M5916)HALLMARK APICAL SURFACE; (M5891)HALLMARK HYPOXIA	0.0	0.0	0.0	0.0	0.0	0.0	0.0	0.0	1.0	0.0	0.0	0.0	0.0	0.0	0.0	0.0	0.0	0.0	0.0	0.0
AC139099.4						None	None	None	None	None	None	None	None	None	nan	nan	nan	nan	nan	nan	nan	nan	nan	nan	nan	nan	nan	nan	nan	nan	nan	nan	nan	nan
MTND1P23	100887749	symbol	H. sapiens	100887749	H. sapiens	MTND1P23	MT-ND1 pseudogene 23								0.0	0.0	0.0	0.0	0.0	0.0	0.0	0.0	0.0	0.0	0.0	0.0	0.0	0.0	0.0	0.0	0.0	0.0	0.0	0.0
RP5-907D15.4						None	None	None	None	None	None	None	None	None	nan	nan	nan	nan	nan	nan	nan	nan	nan	nan	nan	nan	nan	nan	nan	nan	nan	nan	nan	nan
TBC1D27	96597	gene_synonym	H. sapiens	96597	H. sapiens	TBC1D27P	TBC1 domain family member 27, pseudogene								0.0	0.0	0.0	0.0	0.0	0.0	0.0	0.0	0.0	0.0	0.0	0.0	0.0	0.0	0.0	0.0	0.0	0.0	0.0	0.0
SLC19A3	80704	symbol	H. sapiens	80704	H. sapiens	SLC19A3	solute carrier family 19 member 3	GO:0071934 thiamine transmembrane transport;GO:0015888 thiamine transport;GO:0042723 thiamine-containing compound metabolic process		Disease related genes; Transporters:Electrochemical Potential-driven transporters; Potential drug targets; Human disease related genes:Congenital disorders of metabolism:Other congenital disorders of metabolism	Nucleoplasm (Approved); Additional: Cytosol;Plasma membrane				0.0	0.0	0.0	0.0	0.0	0.0	0.0	0.0	0.0	0.0	0.0	0.0	0.0	0.0	0.0	0.0	0.0	0.0	0.0	0.0
MCEMP1	199675	symbol	H. sapiens	199675	H. sapiens	MCEMP1	mast cell expressed membrane protein 1				Plasma membrane (Supported)				0.0	0.0	0.0	0.0	0.0	0.0	0.0	0.0	0.0	0.0	0.0	0.0	0.0	0.0	0.0	0.0	0.0	0.0	0.0	0.0
RP11-630D6.5						None	None	None	None	None	None	None	None	None	nan	nan	nan	nan	nan	nan	nan	nan	nan	nan	nan	nan	nan	nan	nan	nan	nan	nan	nan	nan
[truncated: 1,435 more rows]

## Sheet: Enrichment
GroupID	Category	Term	Description	LogP	Log(q-value)	InTerm_InList	Genes	Symbols
[truncated: 251 more rows]
