# Supplementary material
Source: Research Square preprint supplement (doi:10.21203/rs.3.rs-8947218/v1)
Supplement: Supplementary file 4 [file 17fbc9cfb1731a93dc87830c.xlsx]

## Sheet: lasso_coef105
	weight
RP11-94M14.2	0.675
AC009784.3	0.272
RP11-135A1.3	0.18
FOXC2-AS1	0.1211
PRDM13	0.1012
PIWIL3	0.0896
LINGO2	0.0625
SLC47A1	0.0552
VAX1	0.0398
PNLIPRP3	0.0303
CLDN10	0.0239
RPSAP52	0.0219
BEST3	0.0062
CRNN	0.0045
BRINP3	0.0039
CLDN6	0.0034
CIDEC	0.0024
RP11-467L13.5	0.0019
TMPRSS11A	0.0012
KRT24	0.0009
KRTDAP	0.0003
SLC7A11	0
IL31RA	0
CES1	0
LINC00942	0
BNC1	0
OSGIN1	0
MEFV	0
LINC01139	0
LUCAT1	0
APCDD1L-AS1	0
SPP1	0
TSPAN7	0
AC007879.7	0
STEAP1B	0
NEFL	0
AKR1C7P	0
RP11-104E19.1	0
AC004870.4	0
MYBPH	0
RP1-272L16.1	0
APCDD1L	0
RP11-445P17.8	0
DSG3	0
NTRK2	0
KRT5	0
CLEC4G	0
STAC2	0
KRT72	0
LINC01305	0
ALDOB	0
NTSR1	0
SPTA1	0
SERPINB3	0
RHCG	0
SLC38A4	0
RP5-1185I7.1	0
CCNA1	0
AKR1B10	0
AC108142.1	0
NTNG1	0
SOSTDC1	0
CTD-2104P17.1	0
LGALS9B	0
RP11-677M24.1	0
SERPINB7	0
CGB	0
DAB1	0
TSPYL6	0
KRT16P2	0
C11orf87	0
KRT16P1	0
LMO1	0
PENK	0
SOST	0
RP11-227H15.4	0
DSC3	0
LINC00536	0
AC006262.11	0
RP11-366L20.3	0
LIN28A	0
VN2R19P	0
ARHGAP36	0
RP11-490G2.2	0
AC007163.2	0
CTB-11I22.1	0
AC024084.1	0
ZP4	0
CITF22-49D8.1	0
TMPRSS11BNL	0
DSCR10	0
AJ011931.1	0
KNG1	0
CXCL10	-0.0005
CTD-2332E11.2	-0.0044
AGXT	-0.0106
ACY3	-0.0291
RP11-923I11.5	-0.0434
CSAG4	-0.0782
RP11-834C11.7	-0.0895
UGT2B4	-0.1172
SLC45A2	-0.1287
G6PC	-0.1702
RPL31P50	-0.3377
F13B	-0.9555
