# Supplementary material
Source: Research Square preprint supplement (doi:10.21203/rs.3.rs-8947218/v1)
Supplement: Supplementary file 5 [file 33ee44681cb4f0cdf51d00eb.xlsx]

## Sheet: log_p_bVal_sig
	Pvalue
cg15550572	0.879612
cg26938364	0.634699
cg02483484	0.966722
cg05473804	0.234255
cg15892785	0.80557
cg19809453	0.738709
cg25097074	0.285355
cg21814278	0.308547
cg11518359	0.208362
cg14531560	0.0308573
cg01719793	0.253062
cg25597894	0.632392
cg13969001	0.17737
cg00117172	0.109971
cg06377278	0.343003
cg09649799	0.844059
cg18118033	0.599029
cg15090202	0.340515
cg00925616	0.211972
cg26150071	0.13928
cg02031245	0.349708
cg19228118	0.850648
cg10106804	0.936654
cg00114029	0.9103
cg23048481	0.76826
cg01420426	0.82053
cg03678139	0.990585
cg15576900	0.611887
cg13880950	0.925319
cg22160000	0.876332
cg21868134	0.525506
cg15071854	0.430713
cg12178578	0.330346
cg14913111	0.242462
cg27636310	0.390023
cg14709691	0.526587
cg08160980	0.351109
cg00279790	0.016184
cg03401357	0.152446
cg18475643	0.925035
cg19809499	0.365298
cg15457058	0.271378
cg11856897	0.149249
cg27529871	0.681866
cg27510182	0.506249
cg11248715	0.769582
cg07027116	0.915729
cg26963271	0.143426
cg00460049	0.562854
cg09167553	0.402979
cg15090083	0.967086
cg06211837	0.305922
cg08431563	0.24279
cg24395801	0.972275
cg21913319	0.607399
cg19050990	0.263372
cg16007456	0.00275238
cg14421860	0.694276
cg04156369	0.209721
cg17099397	0.654014
cg23472215	0.669271
cg09152047	0.316716
cg01202526	0.213599
cg13048512	0.965989
cg18935813	0.783666
cg19356191	0.662504
cg00310968	0.0755016
cg26104752	0.985631
cg01466288	0.44499
cg18261050	0.576946
cg22230604	0.228815
cg06982544	0.416329
cg18031008	0.810032
cg13331550	0.981868
cg18760621	0.94728
cg13930105	0.837153
cg20030310	0.669279
cg09248345	0.48078
cg04351049	0.476333
cg18800085	0.650135
cg13958426	0.2088
cg23818870	0.16729
cg08047907	0.325031
cg10509323	0.618427
cg10730174	0.788368
cg17154724	0.290576
cg02011074	0.592057
cg26261793	0.980673
cg06211893	0.724418
cg20800956	0.329684
cg16515523	0.441882
cg14989164	0.676004
cg11423323	0.741371
cg00153856	0.481021
cg11241436	0.948536
cg03660500	0.616829
cg17721249	0.803533
cg26253438	0.116109
cg17822947	0.24989
cg20264068	0.730656
cg00901051	0.42387
cg10236452	0.49361
cg24083324	0.399303
cg11976166	0.781398
cg06899755	0.833896
cg27508144	0.163641
cg17934824	0.257368
cg12405785	0.204018
cg23035715	0.443022
cg26911220	0.575175
cg03940848	0.277268
cg25437385	0.753182
cg09649610	0.29554
cg04412646	0.869194
cg19591056	0.617374
cg12780678	0.621769
cg09464137	0.117654
cg25623934	0.286099
cg13221363	0.175534
cg19113641	0.803482
cg00284173	0.0502537
cg15129506	0.966542
cg06816106	0.447819
cg25737323	0.0752013
cg04092762	0.365941
cg25856383	0.329356
cg07380506	0.678482
cg01936270	0.96512
cg07301433	0.807913
cg19935171	0.368303
cg22373181	0.892371
cg08871052	0.0624272
cg24631482	0.783258
cg27299406	0.1514
cg01561916	0.962828
cg09456289	0.0392561
cg25053336	0.579476
cg06168026	0.20808
cg02147764	0.732291
cg04012592	0.523802
cg18158151	0.0540547
cg19351026	0.468672
cg23497016	0.0162932
cg16178603	0.122082
cg17945976	0.0302247
cg17107572	0.086028
cg25339408	0.938933
cg08276889	0.716984
cg24347663	0.136835
cg15170605	0.554848
cg21294935	0.449825
cg16153547	0.542378
cg22686854	0.470338
cg24632241	0.103411
cg21621248	0.0922906
cg13997864	0.227509
cg11270393	0.606816
cg17968795	0.450308
cg02701278	0.280263
cg22959667	0.474941
cg12518410	0.785167
cg09392940	0.233005
cg17215170	0.104562
cg10888941	0.825736
cg05766802	0.944052
cg08138685	0.305186
cg08572016	0.458539
cg02139871	0.76776
cg20314331	0.471901
cg19465165	0.892644
cg10604002	0.848857
cg19144684	0.913266
cg01308151	0.616669
cg17942639	0.331889
cg23033785	0.806088
cg22663545	0.203628
cg06382344	0.0944108
cg10507402	0.461939
cg25912827	0.310795
cg18395675	0.88396
cg12769138	0.360294
cg12045337	0.725173
cg08748100	0.792234
cg05298922	0.985508
cg02809707	0.740516
cg13886334	0.013821
cg08575330	0.75591
cg14715696	0.261518
cg06952671	0.54333
cg11947981	0.540053
cg20896233	0.105848
cg24589459	0.983915
cg04380340	0.119907
cg13000082	0.28826
cg08266417	0.211839
cg09729613	0.235039
cg12627583	0.517267
cg08578136	0.980736
cg13788515	0.778962
cg05758434	0.865912
cg14553243	0.89383
cg24521848	0.767209
cg24775454	0.651549
cg01446950	0.126363
cg13231700	0.164271
cg18333921	0.910198
cg02562740	0.985224
cg00063174	0.569041
cg08034379	0.879944
cg02806452	0.706613
cg15766075	0.166488
cg00527440	0.498014
cg09615224	0.975581
cg23350106	0.427084
cg21121136	0.568504
cg02797548	0.127035
cg18310412	0.422186
cg08145617	0.722308
cg21124497	0.777091
cg19127283	0.125179
cg25870420	0.728785
cg07892785	0.324951
cg04342821	0.0836422
cg25635144	0.0590136
cg09008417	0.0309899
cg01291029	0.0464164
cg14311608	0.0305486
cg01357292	0.494732
cg09384411	0.782966
cg25805709	0.842256
cg22598028	0.774107
cg02073558	0.743803
cg24837680	0.683321
cg02933119	0.628101
cg17913259	0.793459
cg02858118	0.379221
cg07758574	0.866398
cg20835282	0.31417
cg20603260	0.425104
cg10259735	0.478052
cg19498237	0.624728
cg16523704	0.372492
cg07207099	0.173999
cg08846852	0.188903
cg25755107	0.872835
cg04432597	0.406444
cg00777121	0.814693
cg12966367	0.773864
cg08047457	0.866705
cg21554552	0.648158
cg27569446	0.432182
cg25486143	0.858526
cg04540383	0.706451
cg12149905	0.787338
cg14745871	0.235793
cg08681924	0.313411
cg13491481	0.881948
cg25947544	0.855725
cg12249227	0.275629
cg04244215	0.835432
cg02406285	0.871728
cg05893614	0.609471
cg09301294	0.848281
cg06818532	0.973889
cg01294263	0.792641
cg01031032	0.49755
cg04367486	0.161538
cg03329165	0.326638
cg07251099	0.668374
cg12158737	0.685586
cg00037153	0.497784
cg11616380	0.33961
cg08195943	0.440585
cg21575509	0.919586
cg27326452	0.846485
cg24594997	0.378086
cg11027570	0.878961
cg20532370	0.647487
cg19443257	0.307646
cg15562912	0.157844
cg03060555	0.581654
cg06822689	0.90917
cg02128651	0.804429
cg26123605	0.322331
cg05476568	0.77592
cg14019186	0.316861
cg07654934	0.51138
cg27533704	0.276557
cg21474897	0.22914
cg10541755	0.266607
cg12897942	0.263581
cg27555382	0.887279
cg02728558	0.446421
cg05460130	0.303821
cg12598803	0.910952
cg24302235	0.503067
cg01146875	0.94754
cg13519184	0.127995
cg19245371	0.335409
cg16419629	0.546704
cg21176048	0.105482
cg03312643	0.274472
cg12435415	0.442849
cg24050613	0.699372
cg13419791	0.939377
cg25372568	0.705276
cg06190677	0.32667
cg13432744	0.309467
cg07681728	0.23247
cg12942328	0.888499
cg08969912	0.101934
cg10072850	0.448039
cg21197774	0.833004
cg22834653	0.0689924
cg07127762	0.870749
cg02403395	0.339788
cg11862731	0.544665
cg17663253	0.0380308
cg07434284	0.954044
cg00810208	0.915342
cg05394500	0.164922
cg17460447	0.673867
cg17470837	0.877737
cg16147221	0.500434
cg00731785	0.657177
cg13164157	0.000979848
cg02108033	0.346877
cg27207796	0.801322
cg18790597	0.518446
cg27513574	0.595939
cg18351939	0.31874
cg16146177	0.433295
cg06269673	0.239497
cg20646280	0.205298
cg14777772	0.00973125
cg11935854	0.682255
cg10087973	0.468118
cg18836493	0.576507
cg04528060	0.640237
cg09853371	0.27132
cg24852548	0.526458
cg10728756	0.972817
cg02029926	0.313765
cg19031658	0.160997
cg26162932	0.283858
cg20817902	0.124113
cg08519643	0.358088
cg04478931	0.565857
cg02192967	0.367284
cg20776829	0.306141
cg17334018	0.578824
cg13775316	0.792285
cg02441747	0.171254
cg11979589	0.200856
cg07095995	0.1627
cg04190870	0.138988
cg22135105	0.771988
cg19971716	0.0246344
cg10863741	0.101928
cg03227184	0.00134381
cg14146100	0.516337
cg00091953	0.185332
cg04514249	0.719761
cg24789447	0.744431
cg04478179	0.925095
cg01440841	0.576603
cg18355902	0.174745
cg05874561	0.0689287
cg03202804	0.925578
cg11354906	0.795788
cg18255353	0.342886
cg11934170	0.221801
cg06702880	0.206394
cg02774439	0.00346931
cg01185433	0.202569
cg24472939	0.747768
cg19968631	0.615535
cg24141863	0.428142
cg24642320	0.30469
cg26274580	0.638645
cg14571552	0.922604
cg05028087	0.19613
cg01548300	0.12702
cg24740026	0.186124
cg02496256	0.337218
cg11782779	0.131209
cg07663789	0.852859
cg01252672	0.128917
cg26986911	0.101574
cg20543202	0.228183
cg27003682	0.434059
cg18121355	0.146955
cg00984146	0.599316
cg01060059	0.402626
cg03780132	0.0314914
cg27605748	0.140975
cg23502772	0.101541
cg12634932	0.0711405
cg18242030	0.385888
cg22078451	0.229891
cg26817935	0.0664222
cg10981909	0.261543
cg12662072	0.971921
cg07431286	0.566192
cg14773260	0.0522714
cg25585647	0.763829
cg04502985	0.0990605
cg01283201	0.880232
cg00869417	0.199821
cg15646817	0.172953
cg05542262	0.185856
cg02371408	0.690983
cg19540689	0.849695
cg02551029	0.669193
cg21810188	0.244491
cg27087622	0.451644
cg19777105	0.110504
cg12621171	0.696138
cg02320454	0.457805
cg19779670	0.671681
cg15145693	0.340648
cg27067214	0.246435
cg19933664	0.467331
cg13674042	0.470191
cg00577935	0.879219
cg14511739	0.339062
cg16970232	0.231414
cg23938220	0.197111
cg21634602	0.323438
cg12534150	0.821943
cg24332422	0.0856851
cg15020645	0.408554
cg10569615	0.189368
cg04450862	0.127876
cg14759342	0.0344477
cg24657206	0.0583031
cg27107171	0.228568
cg16483725	0.901426
cg01814098	0.77711
cg06940792	0.811775
cg14441976	0.621977
cg02033258	0.375104
cg22630755	0.274188
cg11260904	0.316699
cg07558472	0.789759
cg11639849	0.936708
cg02105519	0.994406
cg23082339	0.0348453
cg09032310	0.475508
cg13373406	0.914403
cg05482973	0.747174
cg14670974	0.953352
cg00312553	0.788102
cg15968604	0.625206
cg26664797	0.972911
cg16317459	0.780701
cg16126280	0.479856
cg11499970	0.602684
cg12989934	0.410499
cg05947699	0.452944
cg01450705	0.416758
cg07352345	0.0584954
cg17861295	0.687978
cg00594128	0.650767
cg19761115	0.970632
cg01108118	0.461717
cg21347053	0.0414807
cg20384898	0.0479874
cg18760835	0.242066
cg07994987	0.083931
cg25307691	0.783531
cg17619993	0.142871
cg16754467	0.874844
cg20229534	0.37148
cg26237681	0.180376
cg23233404	0.536095
cg22143569	0.770807
cg05446010	0.526821
cg27635394	0.232499
cg07701237	0.157141
cg21250296	0.194737
cg05646373	0.833909
cg25438963	0.633417
cg26256916	0.776174
cg12169977	0.357846
cg01665823	0.856057
cg12392684	0.95015
cg05414338	0.716466
cg15386964	0.114554
cg19247350	0.0734952
cg17332573	0.122855
cg21663122	0.283145
cg14776962	0.0215996
cg15080119	0.0372111
cg11183365	0.756627
cg12298212	0.43472
cg23372001	0.613788
cg23460835	0.829542
cg17718302	0.87731
cg25666433	0.834953
cg02622316	0.748368
cg23164203	0.629385
cg18815343	0.530981
cg13476058	0.815787
cg20657849	0.813464
cg06866163	0.464098
cg10019132	0.903164
cg22410869	0.434537
cg06759058	0.577395
cg02340220	0.456915
cg25197181	0.15754
cg07009376	0.993599
cg01597097	0.367878
cg15490715	0.806789
cg00142106	0.107451
cg21039495	0.0975438
cg14449180	0.136835
cg00409917	0.926087
cg01814945	0.965332
cg21330423	0.577531
cg06414921	0.960524
cg21029447	0.43188
cg16668548	0.669855
cg24108149	0.314913
cg18353088	0.576507
cg04055615	0.812844
cg01379480	0.562564
cg07584663	0.701921
cg22147996	0.551028
cg14533957	0.243575
cg22466425	0.328559
cg16699174	0.371647
cg02897359	0.809329
cg15185479	0.308883
cg18846140	0.194026
cg22715094	0.332305
cg22847691	0.120089
cg00929855	0.376451
cg12643366	0.2656
cg13413286	0.333784
cg17494781	0.417757
cg21588215	0.923953
cg07979401	0.735296
cg05020625	0.712702
cg04310104	0.170431
cg22014661	0.0725359
cg16556906	0.967747
cg06425593	0.145063
cg15045441	0.312785
cg00920327	0.290761
cg05447008	0.895302
cg24687051	0.460026
cg19690766	0.477139
cg12938565	0.60229
cg23424273	0.352241
cg05068340	0.209101
cg05674784	0.368271
cg13315970	0.127791
cg21730993	0.59058
cg14186641	0.197597
cg04207385	0.133861
cg20624391	0.783553
cg10979880	0.155914
cg17398252	0.570834
cg06025938	0.000611329
cg25263140	0.00514932
cg24194539	0.022052
cg02134353	0.517199
cg08382226	0.486097
cg18093751	0.00409395
cg05135644	0.533488
cg00170003	0.689633
cg25146017	0.645245
cg11430157	0.486005
cg26532358	0.43704
cg17382198	0.0384955
cg26483578	0.919642
cg18932809	0.271808
cg20330472	0.428318
cg05493394	0.469879
cg26449787	0.548616
cg06181518	0.605454
cg05062333	0.933155
cg01162672	0.778812
cg17838029	0.792409
cg14270292	0.66265
cg21607030	0.647239
cg24808186	0.478707
cg17290076	0.723108
cg14026561	0.450435
cg08692175	0.781859
cg13098082	0.244017
cg07290739	0.798182
cg16053716	0.854814
cg07615067	0.633003
cg27331241	0.543556
cg20381963	0.597888
cg11461808	0.905193
cg26468007	0.301549
cg22339356	0.450565
cg11104510	0.361175
cg09366357	0.938255
cg04495995	0.0187507
cg20498685	0.477997
cg00240432	0.896247
cg09799658	0.612578
cg15427906	0.617324
cg20259398	0.659742
cg17829673	0.78782
cg20661176	0.307859
cg06847146	0.285351
cg24491766	0.407863
cg22107210	0.906342
cg13316191	0.159862
cg02386159	0.89942
cg24242823	0.482642
cg01210554	0.207877
cg06685968	0.319787
cg26032198	0.542636
cg12196573	0.807739
cg27508551	0.782939
cg20293594	0.880926
cg05471296	0.489047
cg15797110	0.770257
cg07778029	0.560963
cg20741169	0.868808
cg05065989	0.576697
cg21172377	0.497671
cg16857858	0.834515
cg08479590	0.544969
cg21447117	0.473734
cg10767141	0.084005
cg09495769	0.23507
cg01534145	0.508531
cg11831043	0.590972
cg11093548	0.403839
cg04823311	0.918191
cg22348673	0.976138
cg13094036	0.715989
cg14896516	0.841815
cg00549566	0.457146
cg19118812	0.774633
cg02383130	0.157812
cg14249876	0.741636
cg04454951	0.0688326
cg17093995	0.0279956
cg18607529	0.915883
cg20078466	0.218892
cg16499656	0.745871
cg19089073	0.610634
cg01310473	0.0444079
cg01578017	0.668366
cg23151024	0.790178
cg02493644	0.934181
cg00343312	0.802374
cg15759056	0.173854
cg12270822	0.119772
cg00862116	0.0261093
cg24599249	0.288701
cg16934178	0.0417482
cg23498273	0.363621
cg01307939	0.0859579
cg27080725	0.976724
cg20893717	0.765912
cg10864074	0.648813
cg13207797	0.65585
cg13566610	0.869952
cg22338567	0.0608479
cg06248480	0.0404111
cg03167413	0.859469
cg27573591	0.317014
cg15087147	0.679758
cg04153784	0.735412
cg21901946	0.483187
cg15835396	0.45306
cg13971154	0.895531
cg00405843	0.844365
cg26164681	0.577972
cg21913630	0.290725
cg04575058	0.731927
cg09998133	0.453364
cg21621906	0.751949
cg09493063	0.377134
cg02245020	0.0243315
cg07028533	0.0991888
cg17362861	0.902709
cg02432280	0.545279
cg12820681	0.609332
cg03663746	0.0959531
cg15179113	0.256033
cg07671603	0.449851
cg19335954	0.125917
cg04134305	0.569983
cg18349835	0.679775
cg09689137	0.962996
cg26077100	0.953226
cg09052083	0.333806
cg26464821	0.21707
cg18577280	0.216469
cg05956498	0.634722
cg26831415	0.54522
cg27498114	0.574252
cg18991611	0.823842
cg10826197	0.58197
cg16330450	0.280363
cg07770968	0.036768
cg02237470	0.0102791
cg18755296	0.0162753
cg11787346	0.489726
cg12751432	0.600334
cg02182795	0.877171
cg19502867	0.974412
cg17151990	0.504385
cg23750142	0.226077
cg17307479	0.946157
cg05421528	0.231044
cg22322828	0.0301538
cg20502003	0.196444
cg19913430	0.342099
cg12634446	0.0830345
cg06698093	0.444549
cg02569473	0.573377
cg01588438	0.0354609
cg09383816	0.0665367
cg18065361	0.0574839
cg19283840	0.0999853
cg26618965	0.486766
cg00909646	0.33812
cg07922007	0.675204
cg01824969	0.828419
cg14657834	0.16401
cg27467929	0.143789
cg03451212	0.88604
cg20675505	0.954857
cg06102330	0.553607
cg20890210	0.746737
cg05624932	0.20093
cg23134869	0.852786
cg08928882	0.503667
cg01419567	0.449895
cg08322102	0.581896
cg22750155	0.80556
cg18222509	0.349271
cg17116969	0.347429
cg00914041	0.207092
cg19939997	0.504468
cg19101326	0.85093
cg15645638	0.18862
cg15042080	0.869906
cg04237663	0.45713
cg16896847	0.787656
cg11031064	0.193498
cg16316162	0.951173
cg08508337	0.454634
cg19357499	0.770624
cg24064055	0.338562
cg01760475	0.154304
cg06319475	0.133972
cg14267263	0.218984
cg26023087	0.671382
cg11747771	0.630924
cg17009433	0.269869
cg12840719	0.33677
cg13632876	0.567769
cg14066751	0.749844
cg13861122	0.844295
cg15802898	0.139503
cg11258943	0.253694
cg24393316	0.55237
cg13904267	0.335945
cg21192313	0.0344219
cg14632002	0.813224
cg10755973	0.13598
cg18453621	0.544736
cg14470448	0.784716
cg13738140	0.391844
cg13960084	0.211636
cg04351665	0.860863
cg25291138	0.783416
cg20506184	0.264324
cg10311806	0.825408
cg23858040	0.316159
cg27041794	0.274796
cg03813164	0.358469
cg12178980	0.191555
cg14649650	0.894915
cg11880855	0.905414
cg08918274	0.879613
cg23912429	0.731923
cg11973177	0.481816
cg27313572	0.749015
cg12874092	0.403615
cg01392544	0.253157
cg16747247	0.414758
cg25248628	0.184011
cg26899113	0.0958611
cg01553209	0.00389324
cg26647332	0.538666
cg02636041	0.62466
cg00326958	0.129563
cg17824240	0.903359
cg05525499	0.766631
cg06048524	0.108576
cg23407507	0.83927
cg10927719	0.27206
cg22611504	0.260811
cg22853371	0.03135
cg24851364	0.226382
cg18565783	0.502017
cg11206067	0.899117
cg20744625	0.105423
cg20264966	0.451015
cg09405661	0.382003
cg25655799	0.0568412
cg17705334	0.257473
cg01151966	0.683398
cg17984375	0.943544
cg14283380	0.413017
cg11378840	0.638556
cg19704726	0.190105
cg24331598	0.368957
cg05336698	0.100751
cg14096353	0.102587
cg25531836	0.0169916
cg17480467	0.207098
cg17535691	0.629577
cg25741023	0.231052
cg07919108	0.877603
cg19507206	0.268909
cg20718214	0.636838
cg26037945	0.940099
cg16787600	0.0265182
cg06298519	0.189054
cg19485539	0.19203
cg13890706	0.122039
cg10143067	0.531738
cg11854504	0.284059
cg15496864	0.178203
cg20403498	0.751465
cg19564098	0.860058
cg10491556	0.666485
cg22603247	0.069363
cg03853151	0.35862
cg03468945	0.905982
cg23442326	0.644499
cg00073771	0.37007
cg08932440	0.7407
cg08218734	0.337008
cg08701047	0.691977
cg25446309	0.299301
cg12433713	0.531867
cg05825559	0.294745
cg09260089	0.971982
cg01303723	0.550263
cg09639725	0.698241
cg14614314	0.753389
cg00281977	0.775609
cg18131537	0.344772
cg07652350	0.667271
cg13145591	0.46727
cg02659920	0.20329
cg26870460	0.297691
cg25098208	0.365122
cg12740527	0.977736
cg16915821	0.174539
cg17039391	0.115806
cg20973347	0.274372
cg22769941	0.710642
cg03365311	0.279478
cg24335138	0.466673
cg25571757	0.143045
cg18442286	0.573344
cg06282270	0.274957
cg23760165	0.206157
cg00614641	0.942411
cg10336707	0.139626
cg01236148	0.527497
cg06974871	0.726117
cg04557452	0.628103
cg09952395	0.540076
cg22250498	0.837613
cg22796860	0.359405
cg01579950	0.774001
cg04447981	0.620492
cg25361844	0.788026
cg17480646	0.89907
cg16624692	0.359717
cg19018097	0.79492
cg11198128	0.584834
cg01098237	0.848918
cg04658945	0.118559
cg09574088	0.531466
cg26928125	0.563271
cg24199112	0.775179
cg17540356	0.713347
cg17038667	0.699655
cg13103303	0.936114
cg05500015	0.926342
cg09891129	0.38595
cg22638597	0.68185
cg23739994	0.327686
cg13037275	0.814077
cg27296293	0.74905
cg00343633	0.0994279
cg03225817	0.277167
cg23882862	0.00114464
cg22879515	0.25471
cg21881253	0.937933
cg10980774	0.474358
cg19697530	0.883654
cg08070028	0.392055
cg16566400	0.939265
cg13755070	0.149754
cg02526522	0.586932
cg06072021	0.344706
cg17872757	0.197784
cg11017065	0.945395
cg11635839	0.130987
cg10884788	0.391872
cg07052390	0.464674
cg21692846	0.874781
cg03323292	0.385475
cg03315869	0.915532
cg10512292	0.61356
cg05952494	0.521662
cg24796842	0.886747
cg21462428	0.344038
cg25454116	0.382537
cg13575161	0.894456
cg03801902	0.987492
cg10091994	0.89695
cg24626079	0.62696
cg13404421	0.678186
cg17296482	0.723487
cg13801381	0.931576
cg13391820	0.927829
cg06598091	0.566352
cg16135716	0.496218
cg10614021	0.873277
cg06241792	0.764359
cg01085837	0.540756
cg08530237	0.415288
cg23495733	0.277004
cg13509195	0.654085
cg02756106	0.662716
cg10695848	0.980433
cg01291404	0.335547
cg20255775	0.700929
cg00395210	0.252947
cg02982793	0.607316
cg08958015	0.480675
cg08869573	0.949957
cg02620769	0.372068
cg05999245	0.935925
cg18486102	0.0333619
cg08102256	0.515721
cg09889291	0.89249
cg16207330	0.271958
cg08995424	0.61341
cg06632207	0.0865193
cg23278196	0.992873
cg11560280	0.04185
cg17573720	0.545739
cg10641615	0.944324
cg21623748	0.392794
cg03556393	0.399212
cg05069426	0.643128
cg24500832	0.345828
cg10834205	0.380452
cg13867865	0.290465
cg03030717	0.29944
cg23013309	0.377156
cg08815398	0.309677
cg10389229	0.331078
cg19641582	0.0494472
cg09133028	0.576368
cg07684809	0.175295
cg21087137	0.351861
cg04797725	0.80117
cg05854114	0.322415
cg25358039	0.923406
cg10789281	0.771039
cg26272220	0.467017
cg24504927	0.817731
cg24214152	0.901794
cg24083469	0.263005
cg06552356	0.511491
cg23982858	0.432176
cg27420520	0.55048
cg17315500	0.756096
cg14142965	0.716489
cg21858255	0.753723
cg00588621	0.363162
cg22260952	0.463464
cg24546205	0.866285
cg17453780	0.574257
cg27464184	0.716329
cg23367107	0.265932
cg04529785	0.557716
cg25561140	0.0158982
cg15701313	0.205366
cg10233825	0.943964
cg16562275	0.920297
cg25846784	0.537142
cg06349628	0.992883
cg17503995	0.0156095
cg22029275	0.20276
cg01193690	0.693203
cg12800698	0.629746
cg05395403	0.653764
cg21900495	0.245945
cg16302790	0.35624
cg02991571	0.918646
cg16661209	0.300574
cg08676975	0.390652
cg18948722	0.900637
cg05137358	0.198894
cg13975523	0.116375
cg12379940	0.554957
cg05873889	0.346681
cg02472998	0.417375
cg23833588	0.00152105
cg06255601	0.993656
cg17535595	0.732093
cg12602112	0.165709
cg13434989	0.0934861
cg10016380	0.132173
cg14123923	0.060489
cg02279670	0.302234
cg09083627	0.401252
cg07710481	0.49806
cg13580857	0.0168936
cg16232183	0.664944
cg04603730	0.496715
cg16556145	0.632658
cg14684709	0.0596558
cg20057676	0.0093203
cg16398329	0.313786
cg21938148	0.915915
cg01574694	0.0618034
cg23918580	0.638668
cg16761581	0.785957
cg22337128	0.321378
cg23059304	0.412876
cg20891501	0.822924
cg10999312	0.840835
cg01803925	0.607426
cg01085210	0.0467993
cg05295015	0.589652
cg06787731	0.246339
cg13526007	0.155259
cg18856581	0.0917839
cg11268739	0.111828
cg07975778	0.713085
cg26394244	0.336025
cg02191312	0.874688
cg05302386	0.839592
cg19871940	0.756621
cg15436096	0.772197
cg04186360	0.467729
cg01141940	0.00400978
cg16406225	0.720909
cg12189551	0.16354
cg23462956	0.383843
cg05173737	0.0829412
cg04281464	0.978858
cg05829782	0.960867
cg19761272	0.770876
cg17410236	0.449514
cg15891268	0.0962744
cg21495612	0.785031
cg24034005	0.52628
cg14185025	0.852225
cg16366843	0.24189
cg20070026	0.0454846
cg05920961	0.0769592
cg01556502	0.439985
cg02248320	0.0750939
cg14294629	0.22859
cg05786809	0.153546
cg19614698	0.648262
cg13005999	0.854405
cg12425861	0.690512
cg18912855	0.659442
cg03884132	0.30802
cg06540146	0.297691
cg13038216	0.728002
cg15428578	0.061695
cg24493446	0.250941
cg11431346	0.0636026
cg00645339	0.167205
cg22297146	0.14035
cg19850348	0.268264
cg14805347	0.177653
cg07937427	0.945091
cg07716946	0.958177
cg13434638	0.851622
cg25274052	0.673295
cg17588266	0.0674239
cg13834146	0.826717
cg11235741	0.799572
cg24319381	0.858039
cg18952647	0.802553
cg16968596	0.946722
cg14164044	0.922538
cg06963233	0.875613
cg22710306	0.760756
cg26739280	0.532035
cg15391302	0.681959
cg08769966	0.19495
cg01950845	0.343514
cg22191326	0.313251
cg15460872	0.468337
cg18202336	0.563744
cg07779120	0.716077
cg17297216	0.778939
cg09874822	0.219955
cg26029554	0.10612
cg04784471	0.155376
cg02199397	0.543985
cg06396762	0.703607
cg05540369	0.277181
cg16577002	0.570593
cg02678084	0.266404
cg06220235	0.131175
cg18578405	0.411665
cg01705052	0.609733
cg05949903	0.463836
cg03306374	0.0811165
cg27014135	0.590191
cg26734696	0.396577
cg03394150	0.513909
cg09528825	0.974469
cg02043600	0.571758
cg00133595	0.0640815
cg00866976	0.432085
cg00519002	0.669179
cg02512505	0.83619
cg06463589	0.562119
cg05743734	0.963948
cg07844931	0.00109773
cg05869503	0.0893711
cg01434608	0.506424
cg23297477	0.0751037
cg06277900	0.780253
cg02909711	0.80101
cg02367850	0.354269
cg02293437	0.95413
cg08026818	0.621083
cg05374412	0.334282
cg08157228	0.939179
cg10453425	0.911016
cg03743205	0.790907
cg07834574	0.112799
cg20814095	0.614224
cg06944257	0.0529624
cg16732469	0.191998
cg12146546	0.656534
cg06662976	0.263524
cg19064402	0.342618
cg07367232	0.963927
cg18878437	0.944229
cg05562381	0.473686
cg07848706	0.936112
cg23415756	0.0627711
cg08989441	0.640864
cg01275588	0.67523
cg15641446	0.510193
cg25580342	0.324165
cg15119650	0.109807
cg13180678	0.615543
cg13000649	0.360267
cg00073010	0.35317
cg01743962	0.425167
cg12837552	0.148236
cg13004927	0.244608
cg13405332	0.105805
cg00350003	0.321487
cg15760257	0.383999
cg20686234	0.761302
cg14215472	0.625959
cg12851570	0.0365171
cg00555538	0.0971038
cg20919942	0.301689
cg02320501	0.0946319
cg04790084	0.600868
cg18108623	0.0442002
cg08967106	0.379886
cg05527869	0.748912
cg10043865	0.773947
cg10356613	0.459609
cg11164145	0.396869
cg08108311	0.145909
cg08377924	0.154506
cg19548479	0.498004
cg15026277	0.502693
cg03049782	0.355803
cg25830696	0.258649
cg09691340	0.222528
cg08848774	0.578789
cg13001868	0.851256
cg04992638	0.767472
cg08247376	0.849775
cg17222164	0.838715
cg08124910	0.9299
cg18878992	0.236484
cg26606256	0.0770096
cg26281453	0.146803
cg09775582	0.223141
cg11561737	0.177714
cg17457986	0.623953
cg02445664	0.850529
cg12791192	0.677294
cg04795713	0.0846394
cg14598327	0.842066
cg18911472	0.507284
cg14689219	0.640877
cg06942027	0.799152
cg01524174	0.161103
cg03374965	0.568592
cg25019648	0.568463
cg16097357	0.0870671
cg00958884	0.110074
cg27591450	0.622991
cg12865552	0.785169
cg26165269	0.845752
cg02386420	0.885501
cg18516619	0.691905
cg10092374	0.204925
cg05214218	0.1503
cg24287438	0.295333
cg11771234	0.799548
cg17298239	0.760585
cg15258847	0.846095
cg10885961	0.991044
cg16924702	0.155589
cg22335490	0.549016
cg12072964	0.542793
cg21518938	0.00307556
cg14157947	0.0195206
cg20891565	0.0161771
cg06299186	0.0270331
cg23530053	0.00244911
cg21074855	0.026117
cg08188828	0.0134334
cg10416527	0.799866
cg02840109	0.725209
cg10794285	0.0711738
cg05245861	0.0991082
cg03437479	0.2237
cg26155939	0.364421
cg23129478	0.733419
cg12171183	0.156474
cg20294486	0.568689
cg18801691	0.460682
cg19597776	0.990012
cg22409420	0.919209
cg23482397	0.83268
cg19560701	0.37726
cg17602451	0.832746
cg24740531	0.320844
cg27347269	0.455517
cg12799689	0.780478
cg21529405	0.934166
cg18448581	0.183751
cg18961944	0.737784
cg05688651	0.773676
cg16433156	0.217503
cg06954658	0.202961
cg13135595	0.445891
cg08043242	0.80537
cg15527348	0.526314
cg18246368	0.659646
cg11252337	0.517356
cg14194048	0.264633
cg11879536	0.873592
cg17429382	0.396771
cg18994062	0.475679
cg06488775	0.286231
cg12953628	0.856127
cg04598224	0.0593988
cg05950877	0.411499
cg20773651	0.931363
cg01172903	0.623382
cg01404753	0.745946
cg25756435	0.846066
cg23987222	0.648296
cg01336912	0.188512
cg25936054	0.0307824
cg03562044	0.591615
cg17476026	0.0823337
cg18113780	0.564104
cg27275352	0.700046
cg08471835	0.99378
cg09777776	0.452018
cg05525743	0.175488
cg27212234	0.684886
cg24724633	0.838994
cg00578154	0.992229
cg25875213	0.619026
cg25324105	0.587364
cg01436998	0.868215
cg24118894	0.481703
cg22975160	0.58253
cg06747432	0.36957
cg02590401	0.456477
cg21941030	0.534383
cg19808978	0.718707
cg26554406	0.179312
cg21604803	0.71408
cg17838026	0.304608
cg06472476	0.886979
cg27294816	0.538823
cg02574502	0.554989
cg15241920	0.211555
cg27308346	0.132318
cg15708153	0.821459
cg26309134	0.852312
cg13916740	0.982409
cg20984085	0.256363
cg25267765	0.371641
cg08063125	0.612769
cg18597709	0.755322
cg26705688	0.430612
cg19246110	0.611641
cg11977686	0.296417
cg24016939	0.350605
cg21305471	0.558823
cg11312896	0.852843
cg22748799	0.89747
cg22286978	0.322402
cg12042659	0.717852
cg03735888	0.538815
cg05249988	0.510033
cg24366702	0.616095
cg00868383	0.486025
cg19424265	0.996392
cg14424538	0.910002
cg06539804	0.259091
cg13570585	0.273579
cg23328622	0.354419
cg16564824	0.628972
cg13326227	0.936071
cg22906273	0.936394
cg16098981	0.371577
cg12358000	0.464298
cg13727122	0.354752
cg13513864	0.447293
cg09775533	0.760069
cg22976979	0.402803
cg02939019	0.508418
cg19630440	0.289378
cg14335782	0.527988
cg03689076	0.711955
cg12510981	0.822761
cg19595234	0.161131
cg06571407	0.483534
cg01663603	0.535423
cg23634087	0.0324023
cg00125414	0.640688
cg14536096	0.262596
cg05295038	0.293366
cg09893588	0.328643
cg01539036	0.308096
cg02133557	0.633241
cg18412834	0.608367
cg12749863	0.284218
cg05724110	0.0600912
cg05720454	0.875498
cg06106763	0.218772
cg26770917	0.232394
cg21537230	0.140792
cg04228935	0.985926
cg15316660	0.0573266
cg09556952	0.271212
cg24559983	0.161257
cg15097762	0.47239
cg00359604	0.384096
cg00397324	0.852077
cg08924203	0.0675955
cg10457056	0.691386
cg19950455	0.832825
cg00506168	0.133481
cg17353354	0.81185
cg09671060	0.441358
cg01145054	0.919949
cg02776659	0.24226
cg09938462	0.14433
cg21507095	0.263889
cg23268677	0.0540118
cg07019740	0.0552717
cg12175949	0.00726228
cg27645955	0.144044
cg02440976	0.222121
cg11478607	0.37685
cg16483867	0.866588
cg05944207	0.0749544
cg07312514	0.674241
cg19446838	0.802466
cg16564802	0.679684
cg10455938	0.919258
cg10296410	0.387828
cg27554844	0.790136
cg14797198	0.273361
cg20495645	0.602033
cg23080354	0.308719
cg27166033	0.530507
cg27308329	0.964584
cg04158069	0.752305
