# Supplementary material
Source: Research Square preprint supplement (doi:10.21203/rs.3.rs-8947218/v1)
Supplement: Supplementary file 7 [file 5a26e518de686cc4f1041f95.xlsx]

## Sheet: anno_CIMP_new
	AGE	SEX	GRADE	STAGE	PM	PN	PT	DFS_MONTHS	DFS_STATUS	OS_MONTHS	OS_STATUS	TME	CIMP	RACE	FAMILY_HISTORY_CANCER_TYPE	HISTORY_OF_CANCER
TCGA-BT-A2LB-01	73	Female	High Grade	Stage III	M0	N0	T3	NA		16.16	1	Cluster1	CIMP-H	WHITE	Breast-Fem	YES
TCGA-GV-A3QI-01	47	Male	High Grade	Stage III	MX	N0	T3	25.23	Recurred/Progressed	36.47	0	Cluster1	CIMP-H	WHITE		NO
TCGA-XF-A8HF-01	80	Male	High Grade	Stage III	M0	N0	T3	NA		97.04	1	Cluster3	CIMP-H	WHITE	Lung/Bronchus	YES
TCGA-E7-A6ME-01	75	Male	High Grade	Stage II	M0	NX	T2	24.01	DiseaseFree	24.01	0	Cluster1	CIMP-H	ASIAN		NO
TCGA-DK-A1AC-01	72	Male	High Grade	Stage III	M0	N0	T3	130.78	DiseaseFree	130.78	0	Cluster1	CIMP-H	WHITE	Kidney-except Pelvis	YES
TCGA-CU-A3YL-01	67	Male	High Grade	Stage III	M0	N0	T4	12.22	Recurred/Progressed	29.76	0	Cluster1	CIMP-H	WHITE		NO
TCGA-UY-A8OD-01	68	Female	High Grade	Stage II	MX	N0	T2	112.75	DiseaseFree	112.75	0	Cluster3	CIMP-H	BLACK OR AFRICAN AMERICAN		NO
TCGA-KQ-A41O-01	84	Male	High Grade	Stage IV	M0	N1	T3	50.53	DiseaseFree	50.53	0	Cluster1	CIMP-H			NO
TCGA-FD-A3SR-01	68	Male	High Grade	Stage IV	MX	N2	T4	12.22	Recurred/Progressed	19.78	1	Cluster1	CIMP-H	WHITE		NO
TCGA-FD-A6TA-01	58	Male	High Grade	Stage IV	MX	N2	T3	62.81	DiseaseFree	62.81	0	Cluster1	CIMP-H	WHITE		NO
TCGA-GU-AATO-01	75	Male	High Grade	Stage IV	MX	N2	T4	NA		10.64	1	Cluster1	CIMP-H	WHITE		NO
TCGA-BT-A3PJ-01	76	Male	High Grade	Stage III	M0	N0	T3	25.92	DiseaseFree	25.92	0	Cluster1	CIMP-H	WHITE		NO
TCGA-4Z-AA7S-01	66	Male	High Grade	Stage III	M0	N0	T4	NA		34.95	1	Cluster1	CIMP-H	BLACK OR AFRICAN AMERICAN		NO
TCGA-DK-A3IS-01	68	Male	High Grade	Stage II	M0	N0	T2	50.23	DiseaseFree	50.23	0	Cluster1	CIMP-H	WHITE		NO
TCGA-FD-A5BZ-01	77	Female	High Grade	Stage IV	MX	N1	T3	17.51	Recurred/Progressed	27.43	1	Cluster1	CIMP-H	WHITE		NO
TCGA-DK-AA75-01	82	Male	High Grade	Stage III	M0	N0	T3	10.78	Recurred/Progressed	11.17	1	Cluster1	CIMP-H	WHITE	Lung/Bronchus|Lung/Bronchus|Lung/Bronchus|Lung/Bronchus	YES
TCGA-BT-A20N-01	72	Male	High Grade	Stage III	MX	N0	T3	NA		26.12	1	Cluster1	CIMP-H			NO
TCGA-2F-A9KT-01	83	Male	High Grade	Stage II	M0	N0	T2	108.87	DiseaseFree	108.87	0	Cluster1	CIMP-H	WHITE		NO
TCGA-DK-A3IK-01	87	Male	High Grade	Stage IV	M0	N2	T3	NA		4.8	1	Cluster1	CIMP-H	WHITE		NO
TCGA-XF-AAN1-01	75	Female	High Grade	Stage III	M0	N0	T4	21.35	Recurred/Progressed	30.91	1	Cluster3	CIMP-H		Gastric	YES
TCGA-E5-A4U1-01	72	Male	High Grade	Stage II	M0	N0	T2	32.59	Recurred/Progressed	38.8	0	Cluster1	CIMP-H			NO
TCGA-4Z-AA7R-01	73	Male	High Grade	Stage IV	M0	N0	T4	11.6	Recurred/Progressed	17.15	1	Cluster1	CIMP-H	BLACK OR AFRICAN AMERICAN		NO
TCGA-BT-A3PH-01	76	Male	High Grade	Stage IV	MX	N2	T3	NA		4.66	1	Cluster3	CIMP-H	WHITE		NO
TCGA-XF-AAMX-01	87	Female	High Grade	Stage III	MX	N0	T3	NA		6.77	1	Cluster1	CIMP-H	BLACK OR AFRICAN AMERICAN		NO
TCGA-XF-AAMY-01	78	Male	High Grade	Stage III	MX	N0	T3	20.93	Recurred/Progressed	98.92	0	Cluster1	CIMP-H	WHITE	Ovary-NOS|Prostate	YES
TCGA-DK-A3X1-01	78	Female	High Grade	Stage III	M0	N0	T3	66	DiseaseFree	66	0	Cluster3	CIMP-H	WHITE	Lung/Bronchus	YES
TCGA-GD-A3OP-01	84	Female	High Grade	Stage IV	MX	N2	T4	2.1	DiseaseFree	2.1	0	Cluster1	CIMP-H	WHITE		NO
TCGA-E5-A4TZ-01	64	Male	High Grade	Stage IV	MX	N2	T4	14.29	Recurred/Progressed	15.34	1	Cluster1	CIMP-H	WHITE	Breast-Fem|Liver-Primary-NOS	YES
TCGA-K4-A6MB-01	64	Male	High Grade	Stage IV	MX	N1	T3	15.41	DiseaseFree	15.41	0	Cluster1	CIMP-H	WHITE		NO
TCGA-HQ-A2OE-01	69	Male			MX	N2	T2	38.57	DiseaseFree	38.57	0	Cluster1	CIMP-H			NO
TCGA-GV-A40E-01	75	Male	High Grade	Stage II	MX	NX		7.46	Recurred/Progressed	8.57	1	Cluster1	CIMP-H	WHITE		NO
TCGA-DK-AA6U-01	64	Male		Stage II	M0	N0		18.99	DiseaseFree	18.99	0	Cluster1	CIMP-H	WHITE	Skin-Squamous cell carcinoma	YES
TCGA-ZF-AA51-01	69	Female	High Grade	Stage II	M0	NX	T2	56.31	DiseaseFree	56.31	0	Cluster1	CIMP-H	WHITE		NO
TCGA-DK-AA6S-01	60	Male	High Grade	Stage III	M0	N0	T3	72.34	Recurred/Progressed	165.9	0	Cluster1	CIMP-H	WHITE		NO
TCGA-5N-A9KM-01	73	Female	High Grade	Stage III	MX	N0	T4	9.07	Recurred/Progressed	17.41	1	Cluster1	CIMP-H	WHITE		NO
TCGA-GV-A3JV-01	66	Male	High Grade	Stage IV	MX	N1	T3	4.4	Recurred/Progressed	14.26	1	Cluster3	CIMP-H	WHITE	Prostate|Prostate	YES
TCGA-GV-A3JZ-01	55	Male	High Grade	Stage IV	MX	N3	T4	19.81	DiseaseFree	19.81	0	Cluster1	CIMP-H	WHITE		NO
TCGA-LT-A8JT-01	69	Female	High Grade	Stage II	M0	N0	T2	21.06	DiseaseFree	21.06	0	Cluster1	CIMP-H	WHITE		NO
TCGA-2F-A9KP-01	66	Male	High Grade	Stage IV	MX	N2	T3	11.27	Recurred/Progressed	11.96	1	Cluster3	CIMP-H	WHITE		NO
TCGA-XF-AAMZ-01	81	Female	High Grade	Stage IV	MX	N2	T3	44.15	Recurred/Progressed	44.28	1	Cluster3	CIMP-H	WHITE		NO
TCGA-4Z-AA81-01	80	Male	High Grade	Stage II	M0	N0	T2	NA		41.72	1	Cluster3	CIMP-H	WHITE		NO
TCGA-K4-A54R-01	59	Male	High Grade	Stage II	MX	N0	T2	27.66	DiseaseFree	27.66	0	Cluster1	CIMP-H	WHITE		NO
TCGA-DK-AA76-01	64	Female	High Grade	Stage II	M0	N0		12.02	DiseaseFree	12.02	0	Cluster1	CIMP-H	WHITE		NO
TCGA-GC-A6I3-01	90	Female	High Grade	Stage IV	MX	N1	T3	13.9	DiseaseFree	13.9	0	Cluster1	CIMP-H	BLACK OR AFRICAN AMERICAN	NOS	YES
TCGA-GD-A3OQ-01	48	Male	High Grade	Stage IV	MX	N1	T4	3.12	DiseaseFree	3.12	0	Cluster1	CIMP-H	WHITE		NO
TCGA-ZF-A9RM-01	70	Male	High Grade	Stage II	MX	N0	T0	47.8	DiseaseFree	47.8	0	Cluster1	CIMP-H	WHITE	Lung/Bronchus	YES
TCGA-YF-AA3M-01	57	Male	High Grade	Stage II	MX	NX	T2	12.52	Recurred/Progressed	13.63	0	Cluster1	CIMP-H			NO
TCGA-4Z-AA84-01	61	Male	High Grade	Stage IV	M1	N2	T3	15.11	DiseaseFree	15.11	0	Cluster1	CIMP-H	WHITE		NO
TCGA-E7-A85H-01	64	Male	High Grade	Stage III	M0	N0	T3	12.94	DiseaseFree	12.94	0	Cluster3	CIMP-H	ASIAN		NO
TCGA-BT-A20P-01	81	Female	High Grade	Stage III	M0	N0	T3	NA		17.87	1	Cluster1	CIMP-H	WHITE		NO
TCGA-UY-A9PD-01	80	Male	High Grade	Stage III	MX	N0	T3	17.81	DiseaseFree	17.81	0	Cluster1	CIMP-H	WHITE		NO
TCGA-4Z-AA80-01	73	Male	High Grade	Stage II	M0	N0	T2	NA		0.62	1	Cluster1	CIMP-H	WHITE		NO
TCGA-XF-A8HD-01	77	Male	High Grade	Stage III	MX	N0	T3	97.37	DiseaseFree	97.37	0	Cluster1	CIMP-H	WHITE		NO
TCGA-DK-A3IN-01	72	Male	High Grade	Stage III	M0	N0	T4	NA		8.21	1	Cluster1	CIMP-H	WHITE	GI|Colon	YES
TCGA-FJ-A3Z7-01	76	Male	High Grade	Stage IV	MX	N2	T4	31.04	DiseaseFree	31.04	0	Cluster1	CIMP-H	WHITE		NO
TCGA-E7-A541-01	66	Male	High Grade	Stage II	MX	N0	T2	NA		25.56	1	Cluster3	CIMP-H	WHITE		NO
TCGA-UY-A78M-01	81	Female	High Grade	Stage IV	MX	N2	T2	NA		22.67	1	Cluster1	CIMP-H	ASIAN	[Not Available]|[Not Available]	YES
TCGA-FD-A3SN-01	79	Male	High Grade	Stage III	MX	N0	T3	6.54	Recurred/Progressed	29.14	0	Cluster1	CIMP-H	WHITE	NOS|Gastric|Lung/Bronchus	YES
TCGA-G2-A2EO-01	69	Male	High Grade	Stage III	M0	N0	T3	NA		59.26	1	Cluster1	CIMP-H	WHITE	Liver-Hepatoblastoma|Adrenal Cortical Tumor	YES
TCGA-CF-A8HX-01	55	Female	High Grade	Stage II	M0	N0	T2	11.33	DiseaseFree	11.33	0	Cluster1	CIMP-H	ASIAN		NO
TCGA-G2-A2EL-01	77	Male	High Grade	Stage II	M0	N0		3.45	Recurred/Progressed	26.91	1	Cluster1	CIMP-H	WHITE	Head/Face/Neck	YES
TCGA-FJ-A3ZF-01	73	Male	High Grade	Stage III	M0	N0		17.21	DiseaseFree	17.21	0	Cluster1	CIMP-H	WHITE	Lung/Bronchus	YES
TCGA-MV-A51V-01	75	Male	High Grade	Stage III	M0	N0	T3	13.47	DiseaseFree	13.47	0	Cluster1	CIMP-H	WHITE	Gastric	YES
TCGA-DK-A1A5-01	79	Male	High Grade	Stage II	M0	N0	T2	NA		2.14	1	Cluster1	CIMP-H	WHITE	Melanoma	YES
TCGA-FT-A61P-01	76	Male	High Grade	Stage IV	MX	N2	T3	11.07	DiseaseFree	11.07	0	Cluster1	CIMP-H	WHITE		NO
TCGA-LT-A5Z6-01	56	Male	High Grade	Stage II	MX	NX		15.57	DiseaseFree	15.57	0	Cluster1	CIMP-H	WHITE	Head/Face/Neck|Prostate	YES
TCGA-XF-A9SV-01	82	Male	High Grade	Stage IV	M1	N2	T4	7.79	Recurred/Progressed	12.75	1	Cluster1	CIMP-H	WHITE		NO
TCGA-E7-A4IJ-01	56	Male	High Grade	Stage II	M0	NX	T2	20.37	Recurred/Progressed	22.14	1	Cluster1	CIMP-H	ASIAN		NO
TCGA-FD-A5BR-01	57	Male	High Grade	Stage II	MX	N0	T2	26.71	DiseaseFree	26.71	0	Cluster1	CIMP-H	WHITE		NO
TCGA-C4-A0F6-01	82	Female	High Grade	Stage III	M0	N0	T3	23	DiseaseFree	23	0	Cluster3	CIMP-H			NO
TCGA-ZF-A9R1-01	81	Male	High Grade	Stage IV	M0	N1	T3	24.9	Recurred/Progressed	25.39	0	Cluster1	CIMP-H	WHITE		NO
TCGA-G2-AA3B-01	75	Female	High Grade	Stage II	M0	N0	T2	65.97	DiseaseFree	65.97	0	Cluster3	CIMP-H	WHITE		NO
TCGA-FD-A3SS-01	66	Male	High Grade	Stage IV	MX	N3	T4	10.18	Recurred/Progressed	12.84	1	Cluster1	CIMP-H	WHITE		NO
TCGA-ZF-A9RL-01	61	Male	High Grade	Stage II	MX			82.42	Recurred/Progressed	88.8	0	Cluster1	CIMP-H	WHITE	Gastric|Breast-Fem|CNS	YES
TCGA-ZF-A9R9-01	58	Male	High Grade	Stage IV	MX	N2	T3	27.99	Recurred/Progressed	28.38	1	Cluster1	CIMP-H	WHITE		NO
TCGA-KQ-A41P-01	76	Male	High Grade	Stage IV	M1	N3	T3	5.85	Recurred/Progressed	35.94	0	Cluster3	CIMP-H	WHITE		NO
TCGA-HQ-A5NE-01	57	Male	High Grade	Stage III	M0	N0	T3	6.93	Recurred/Progressed	12.16	1	Cluster1	CIMP-H			NO
TCGA-FD-A62P-01	76	Male	High Grade	Stage II	MX	N0	T2	NA		6.27	1	Cluster1	CIMP-H	WHITE		NO
TCGA-S5-AA26-01	46	Male	High Grade	Stage III	MX	N0	T3	16.52	DiseaseFree	16.52	0	Cluster3	CIMP-H	BLACK OR AFRICAN AMERICAN		NO
TCGA-CF-A9FF-01	52	Male	High Grade	Stage II	M0	N0	T2	11.86	DiseaseFree	11.86	0	Cluster1	CIMP-H	ASIAN		NO
TCGA-4Z-AA87-01	72	Male	High Grade	Stage III	M0	N0	T4	19.09	Recurred/Progressed	47.77	0	Cluster1	CIMP-H	BLACK OR AFRICAN AMERICAN		NO
TCGA-CU-A0YO-01	84	Male	High Grade	Stage IV	MX	N2	T3	3.88	Recurred/Progressed	4.89	1	Cluster1	CIMP-H	WHITE	Lung/Bronchus	YES
TCGA-ZF-AA4X-01	56	Male	High Grade	Stage II	M0	NX	T2	54.8	Recurred/Progressed	67.15	0	Cluster1	CIMP-H	WHITE	Colon	YES
TCGA-YF-AA3L-01	47	Female	High Grade	Stage II	MX	N0	T2	11.96	DiseaseFree	11.96	0	Cluster1	CIMP-H		Lung/Bronchus|Gynecology-NOS	YES
TCGA-XF-AAN7-01	60	Male	High Grade	Stage IV	MX	N1	T3	10.55	Recurred/Progressed	18.56	1	Cluster1	CIMP-H	WHITE		NO
TCGA-FD-A62O-01	74	Male	High Grade	Stage IV	MX	N2	T3	NA		7.1	1	Cluster3	CIMP-H	WHITE		NO
TCGA-XF-AAMG-01	49	Male	High Grade	Stage III	MX	N0	T4	110.51	DiseaseFree	110.51	0	Cluster3	CIMP-H	WHITE	Lymphoma	YES
TCGA-UY-A78L-01	62	Male	High Grade	Stage IV	MX	N1		11.66	Recurred/Progressed	37.02	0	Cluster1	CIMP-H	WHITE	[Not Available]|[Not Available]	YES
TCGA-UY-A9PB-01	49	Male	High Grade	Stage III	MX	N0	T3	29.53	DiseaseFree	29.53	0	Cluster1	CIMP-H	WHITE		NO
TCGA-XF-A9SK-01	65	Male	High Grade	Stage IV	MX	N1	T3	12.55	Recurred/Progressed	15.97	1	Cluster1	CIMP-H	WHITE	Pancreas|Breast-Fem	YES
TCGA-4Z-AA89-01	60	Male	High Grade	Stage IV	M0	N0	T4	29.07	Recurred/Progressed	33.8	0	Cluster1	CIMP-H	WHITE	Prostate|Rectum	YES
TCGA-E7-A6MD-01	66	Male	High Grade	Stage IV	M0	N1	T4	4.24	DiseaseFree	4.24	0	Cluster1	CIMP-H	WHITE		NO
TCGA-GV-A3JX-01	59	Male	High Grade	Stage III	MX	N0	T3	19.09	DiseaseFree	19.09	0	Cluster3	CIMP-H	WHITE		NO
TCGA-UY-A8OB-01	63	Male	High Grade	Stage IV	MX	N1	T3	69.28	DiseaseFree	69.28	0	Cluster3	CIMP-H	WHITE		NO
TCGA-DK-A1AD-01	69	Male	High Grade	Stage IV	M0	N2	T3	112.35	DiseaseFree	112.35	0	Cluster1	CIMP-H	WHITE	Bladder|Prostate|Esophagus	YES
TCGA-CF-A47X-01	60	Male	Low Grade	Stage II	M0	N0	T2	12.61	DiseaseFree	12.61	0	Cluster1	CIMP-H	ASIAN		NO
TCGA-2F-A9KW-01	67	Female	High Grade	Stage III	MX	N0	T3	2.79	Recurred/Progressed	8.34	1	Cluster1	CIMP-H	WHITE		NO
TCGA-FD-A5C1-01	61	Female	High Grade	Stage III	MX	N0	T3	58.87	DiseaseFree	58.87	0	Cluster1	CIMP-H	WHITE		NO
TCGA-2F-A9KQ-01	69	Male	High Grade	Stage III	M0	N0	T3	94.81	DiseaseFree	94.81	0	Cluster1	CIMP-H	WHITE		NO
TCGA-FD-A43N-01	76	Male	High Grade	Stage III	MX	N0	T3	22.96	DiseaseFree	22.96	0	Cluster1	CIMP-H	WHITE	Lung/Bronchus|Liver-Primary-NOS	YES
TCGA-YC-A89H-01	78	Female	High Grade	Stage II	MX			18.82	DiseaseFree	18.82	0	Cluster3	CIMP-H	WHITE		NO
TCGA-C4-A0EZ-01	69	Female	High Grade	Stage IV	M1	N1	T3	NA		8.97	1	Cluster1	CIMP-H			NO
TCGA-DK-AA6W-01	78	Male	High Grade	Stage II	M0	N0	T2	12.45	Recurred/Progressed	13.63	1	Cluster1	CIMP-H	WHITE	Lung/Bronchus|Leukemia-NOS|Breast-Fem	YES
TCGA-DK-A2HX-01	80	Female	High Grade	Stage IV	M0	N2	T3	NA		46.65	1	Cluster1	CIMP-H	WHITE	Breast-Fem	YES
TCGA-4Z-AA83-01	52	Male	High Grade	Stage II	M0	N0	T2	66.49	DiseaseFree	66.49	0	Cluster3	CIMP-H	WHITE		NO
TCGA-XF-A8HG-01	69	Male	High Grade	Stage III	MX	N0	T3	13.07	Recurred/Progressed	15.34	1	Cluster1	CIMP-H	WHITE	Kidney-except Pelvis|Bladder|Lymphoma	YES
TCGA-ZF-A9R4-01	83	Male	High Grade	Stage II	M0	NX	T2	30.26	DiseaseFree	30.26	0	Cluster1	CIMP-H	WHITE		NO
TCGA-KQ-A41R-01	80	Female	High Grade	Stage II	MX	N0	T2	44.35	DiseaseFree	44.35	0	Cluster1	CIMP-H	WHITE		NO
TCGA-DK-A2I4-01	79	Male	High Grade	Stage III	M0	N0	T3	142.67	DiseaseFree	142.67	0	Cluster1	CIMP-H	WHITE	CNS	YES
TCGA-G2-A3VY-01	66	Male	High Grade	Stage II				17.61	DiseaseFree	17.61	0	Cluster1	CIMP-H	ASIAN		NO
TCGA-GC-A3RC-01	59	Male	High Grade	Stage II	M0	N0	T2	15.9	DiseaseFree	15.9	0	Cluster3	CIMP-H	WHITE		NO
TCGA-GV-A3QK-01	56	Female	High Grade	Stage IV	M0	N2	T4	27.33	DiseaseFree	27.33	0	Cluster1	CIMP-H	WHITE	Gastric	YES
TCGA-ZF-A9RC-01	77	Male	High Grade	Stage III	MX	N0	T3	94.22	DiseaseFree	94.22	0	Cluster1	CIMP-H	WHITE		NO
TCGA-DK-AA6L-01	48	Male	High Grade	Stage IV	MX	N1	T3	30.22	Recurred/Progressed	38.21	1	Cluster1	CIMP-H	WHITE		NO
TCGA-BT-A20R-01	79	Female	High Grade	Stage IV	M0	N1	T3	NA		5.06	1	Cluster1	CIMP-H	WHITE		NO
TCGA-FD-A3B6-01	75	Male	High Grade	Stage II	MX	N0	T2	NA		33.02	1	Cluster3	CIMP-H	WHITE		NO
TCGA-BT-A42C-01	64	Male	High Grade	Stage II	M0	N0		28.68	DiseaseFree	28.68	0	Cluster1	CIMP-H	WHITE		NO
TCGA-FD-A6TI-01	73	Male	High Grade	Stage IV	MX	N1	T4	NA		9.66	1	Cluster3	CIMP-H	WHITE		NO
TCGA-DK-A3X2-01	85	Male	High Grade	Stage IV	M0	N2	T3	17.51	Recurred/Progressed	17.97	1	Cluster1	CIMP-H	WHITE	Colon|Kidney-except Pelvis|Ovary-NOS	YES
TCGA-ZF-A9R2-01	75	Male	High Grade	Stage II	M0	N0	T2	21.09	DiseaseFree	21.09	0	Cluster3	CIMP-H	WHITE		NO
TCGA-ZF-A9R0-01	82	Male	High Grade	Stage III	M0	NX	T3	18.36	Recurred/Progressed	22.34	1	Cluster3	CIMP-H	WHITE		NO
TCGA-XF-A9SP-01	59	Male	High Grade	Stage III	MX	N0	T3	10.18	Recurred/Progressed	14.91	1	Cluster1	CIMP-H	WHITE	Esophagus|CNS	YES
TCGA-G2-A2EK-01	57	Male	High Grade	Stage II	M0	N0		15.93	Recurred/Progressed	15.93	0	Cluster1	CIMP-H	WHITE	Skin-Squamous cell carcinoma	YES
TCGA-UY-A9PF-01	77	Male	High Grade	Stage IV	MX	N2	T3	3.84	DiseaseFree	3.84	0	Cluster1	CIMP-H	WHITE		NO
TCGA-FD-A5C0-01	61	Male	High Grade	Stage IV	MX	N2	T3	13.99	Recurred/Progressed	18.07	1	Cluster1	CIMP-H	WHITE		NO
TCGA-K4-AAQO-01	56	Male	High Grade	Stage III	MX	N0	T3	11.79	DiseaseFree	11.79	0	Cluster1	CIMP-H	WHITE		NO
TCGA-DK-AA71-01	71	Male	High Grade	Stage II	M0	N0	T2	13.63	DiseaseFree	13.63	0	Cluster1	CIMP-H	WHITE	Breast-Fem|Breast-Fem	YES
TCGA-LC-A66R-01	78	Male	High Grade	Stage IV	MX	N2	T4	15.31	DiseaseFree	15.31	0	Cluster1	CIMP-H	WHITE	Ovary-NOS|Gastric	YES
TCGA-H4-A2HO-01	53	Male	High Grade	Stage III	MX	N0	T4	1.51	DiseaseFree	1.51	0	Cluster1	CIMP-H	WHITE		NO
TCGA-DK-A6B2-01	70	Male	High Grade	Stage IV	M0	N1	T3	8.8	Recurred/Progressed	15.67	0	Cluster1	CIMP-H	WHITE	Breast-Fem	YES
TCGA-UY-A78N-01	80	Male	High Grade	Stage IV	MX	N1	T2	81.21	Recurred/Progressed	86.76	1	Cluster3	CIMP-H	WHITE	Gastric|NOS	YES
TCGA-GC-A4ZW-01	71	Male	High Grade	Stage III	M0	N0	T3	0.49	DiseaseFree	0.49	0	Cluster3	CIMP-H	WHITE		NO
TCGA-DK-AA6R-01	68	Male	High Grade	Stage IV	M0	N1	T4	161.2	Recurred/Progressed	165.6	0	Cluster1	CIMP-H	WHITE		NO
TCGA-4Z-AA7Y-01	60	Male	High Grade	Stage II	M0	N0	T2	50	DiseaseFree	50	0	Cluster1	CIMP-H	WHITE	Lung/Bronchus|Leukemia-NOS	YES
TCGA-KQ-A41Q-01	89	Male	High Grade	Stage III	MX	N0	T3	43.17	Recurred/Progressed	46.94	0	Cluster1	CIMP-H	WHITE		NO
TCGA-FD-A6TC-01	79	Female	High Grade	Stage III	MX	N0	T4	6.14	DiseaseFree	6.14	0	Cluster1	CIMP-H	WHITE		NO
TCGA-GV-A40G-01	77	Male	High Grade	Stage II	MX	N0	T2	19.05	DiseaseFree	19.05	0	Cluster1	CIMP-H	WHITE		NO
TCGA-UY-A9PE-01	86	Male	High Grade	Stage IV	MX	N2	T2	15.54	Recurred/Progressed	6.21	0	Cluster1	CIMP-H	WHITE		NO
TCGA-CU-A3QU-01	58	Male	High Grade	Stage IV	M0	N1	T2	5.19	DiseaseFree	5.19	0	Cluster3	CIMP-H	WHITE		NO
TCGA-DK-A1A6-01	53	Male	High Grade	Stage IV	M0	N1	T2	66.36	DiseaseFree	66.36	0	Cluster1	CIMP-H	WHITE	Liver-Primary-NOS	YES
TCGA-K4-A3WU-01	87	Male	High Grade	Stage III	MX	N0	T4	3.45	DiseaseFree	3.45	0	Cluster1	CIMP-H	WHITE	Bladder|NOS	YES
TCGA-DK-A1A6-06	53	Male	High Grade	Stage IV	M0	N1	T2	66.36	DiseaseFree	66.36	0	Cluster1	CIMP-H	WHITE	Liver-Primary-NOS	YES
TCGA-UY-A78O-01	75	Female	High Grade	Stage II	MX	N0	T2	75.95	DiseaseFree	75.95	0	Cluster3	CIMP-H	WHITE	[Not Available]|[Not Available]	YES
TCGA-ZF-AA4T-01	65	Male	High Grade	Stage IV	MX	N2	T4	16.79	Recurred/Progressed	19.68	1	Cluster1	CIMP-H	WHITE		NO
TCGA-BL-A0C8-01	73	Male	High Grade	Stage I	M0	NX	T1	25.99	Recurred/Progressed	40.05	0	Cluster1	CIMP-H	WHITE		NO
TCGA-XF-A9SY-01	60	Female	High Grade	Stage IV	MX	N2	T3	5.52	Recurred/Progressed	21.02	0	Cluster2	CIMP-L	WHITE	NOS	YES
TCGA-UY-A9PH-01	73	Male	High Grade	Stage II	MX	N0	T2	51.28	DiseaseFree	51.28	0	Cluster2	CIMP-L	WHITE		NO
TCGA-SY-A9G0-01	82	Male	High Grade	Stage IV	M0	N1	T4	NA		33.11	1	Cluster2	CIMP-L	WHITE		NO
TCGA-DK-AA6P-01	72	Female	High Grade	Stage II	M0	N0		0.53	Recurred/Progressed	15.01	0	Cluster2	CIMP-L	WHITE		NO
TCGA-GC-A6I1-01	90	Female	High Grade	Stage II	MX	N0	T2	NA		8.94	1	Cluster2	CIMP-L	WHITE		NO
TCGA-BT-A42B-01	59	Male	High Grade	Stage IV	MX	N1	T3	NA		17.54	1	Cluster3	CIMP-L	WHITE		NO
TCGA-DK-A1AE-01	84	Male	High Grade	Stage III	M0	N0	T3	6.93	Recurred/Progressed	16.13	0	Cluster2	CIMP-L	WHITE	Bladder	YES
TCGA-FD-A5BS-01	68	Male	High Grade	Stage III	MX	N0	T3	53.84	DiseaseFree	53.84	0	Cluster2	CIMP-L	WHITE		NO
TCGA-G2-AA3F-01	77	Male	High Grade	Stage IV	M0	N1	T3	29.34	DiseaseFree	29.34	0	Cluster3	CIMP-L	WHITE	Colon	YES
TCGA-XF-A8HH-01	61	Female	High Grade	Stage IV	M0	N2	T3	NA		1.87	1	Cluster3	CIMP-L	WHITE		NO
TCGA-GU-A762-01	87	Male	High Grade	Stage IV	MX	N2	T4	NA		7.62	1	Cluster3	CIMP-L	WHITE		NO
TCGA-YC-A8S6-01	71	Male	High Grade	Stage II	MX	N0	T2	9.63	DiseaseFree	9.63	0	Cluster2	CIMP-L	WHITE		NO
TCGA-BT-A2LD-01	78	Female	High Grade	Stage IV	M0	N1	T3	18.23	Recurred/Progressed	20.47	1	Cluster2	CIMP-L	WHITE	Liver-Primary-NOS	YES
TCGA-FD-A3B8-01	56	Male	High Grade	Stage II	MX	N0	T2	12.61	DiseaseFree	12.61	0	Cluster2	CIMP-L	WHITE		NO
TCGA-BT-A20V-01	59	Female	High Grade	Stage IV	M0	N2	T4	NA		5.06	1	Cluster2	CIMP-L	BLACK OR AFRICAN AMERICAN		NO
TCGA-R3-A69X-01	70	Male	High Grade	Stage III	M0	N0	T3	14.22	DiseaseFree	14.22	0	Cluster2	CIMP-L	WHITE		NO
TCGA-G2-A2ES-01	85	Male	High Grade	Stage II	M0	N0	T3	29.47	Recurred/Progressed	32.98	1	Cluster2	CIMP-L	WHITE		NO
TCGA-XF-A9T6-01	88	Female	High Grade	Stage III	MX	N0	T3	2.1	DiseaseFree	2.1	0	Cluster3	CIMP-L	WHITE	NOS|Pancreas	YES
TCGA-ZF-AA53-01	60	Male	High Grade	Stage II	M0	NX	T2	57.85	DiseaseFree	57.85	0	Cluster2	CIMP-L	WHITE	Lung/Bronchus|CNS|CNS	YES
TCGA-GU-A42Q-01	67	Male	High Grade	Stage III	M0	N0	T3	NA		11.3	1	Cluster2	CIMP-L	WHITE	Kidney-except Pelvis|Leukemia-NOS	YES
TCGA-BT-A0S7-01	75	Male	High Grade	Stage III	MX	N0	T4	NA		6.57	1	Cluster2	CIMP-L	WHITE		NO
TCGA-CF-A47W-01	42	Male	Low Grade	Stage II	M0	N0	T2	12.09	DiseaseFree	12.09	0	Cluster2	CIMP-L	ASIAN		NO
TCGA-ZF-A9R7-01	76	Female	High Grade	Stage II	M0	NX		21.85	DiseaseFree	21.85	0	Cluster3	CIMP-L	WHITE	Uterine	YES
TCGA-E7-A7DV-01	44	Male	High Grade	Stage IV	MX	N3	T4	1.22	DiseaseFree	1.22	0	Cluster2	CIMP-L	WHITE		NO
TCGA-FD-A3B4-01	55	Female	High Grade	Stage III	MX	N0	T4	11.79	Recurred/Progressed	16.75	1	Cluster2	CIMP-L	BLACK OR AFRICAN AMERICAN	Breast-Fem|Head/Face/Neck|Leukemia-NOS|Breast-Fem	YES
TCGA-XF-AAN4-01	77	Female	High Grade	Stage III	MX	N0	T3	NA		27.04	1	Cluster2	CIMP-L	WHITE	Pancreas	YES
TCGA-ZF-A9RF-01	74	Male	High Grade	Stage II	M0	NX	T1	51.41	Recurred/Progressed	64.03	0	Cluster3	CIMP-L	WHITE	Breast-Fem	YES
TCGA-E7-A5KE-01	78	Female	High Grade	Stage II	M0	N0	T2	0.56	DiseaseFree	0.56	0	Cluster3	CIMP-L	ASIAN		NO
TCGA-CF-A9FH-01	85	Male	Low Grade	Stage II	M0	N0	T2	-2.1	DiseaseFree	-2.1	0	Cluster2	CIMP-L	ASIAN		NO
TCGA-ZF-A9RG-01	70	Female	High Grade	Stage III	MX	N0	T3	35.68	Recurred/Progressed	58.67	0	Cluster2	CIMP-L	WHITE	Breast-Fem|Breast-Fem|[Not Available]	YES
TCGA-FJ-A3Z9-01	72	Male	High Grade		M0	N0	TX	NA		12.65	1	Cluster2	CIMP-L	WHITE		NO
TCGA-E7-A8O7-01	52	Male	Low Grade	Stage II	M0	N0	T2	15.31	DiseaseFree	15.31	0	Cluster2	CIMP-L	ASIAN		NO
TCGA-BL-A3JM-01	62	Male	High Grade	Stage III	M0	N0	T3	3.65	Recurred/Progressed	6.73	1	Cluster3	CIMP-L	WHITE		NO
TCGA-G2-AA3C-01	66	Male	High Grade	Stage IV	M0	N1	T3	NA		6.93	1	Cluster2	CIMP-L	WHITE	Breast-Fem	YES
TCGA-CF-A3MI-01	62	Male	Low Grade	Stage II	M0	N0	T2	12.16	DiseaseFree	12.16	0	Cluster2	CIMP-L	ASIAN		NO
TCGA-DK-AA77-01	61	Male	High Grade	Stage II	M0	N0	T2	15.34	Recurred/Progressed	20.3	0	Cluster2	CIMP-L	WHITE	Multiple Myeloma	YES
TCGA-XF-AAME-01	64	Female	High Grade	Stage II	MX	N0	T2	87.48	Recurred/Progressed	92.9	1	Cluster2	CIMP-L	WHITE	Breast-Fem	YES
TCGA-FD-A6TF-01	80	Female	High Grade	Stage IV	M1	N2	T3	NA		2.27	1	Cluster2	CIMP-L	WHITE		NO
TCGA-ZF-AA56-01	79	Female	High Grade	Stage III	MX	N0	T4	8.15	Recurred/Progressed	8.51	1	Cluster2	CIMP-L	WHITE	Prostate|Colon	YES
TCGA-K4-A3WS-01	66	Male	High Grade	Stage III	MX	N0	T3	25	DiseaseFree	25	0	Cluster2	CIMP-L	WHITE		NO
TCGA-K4-A5RI-01	67	Female	High Grade	Stage III	MX	N0	T3	7.79	Recurred/Progressed	11.7	1	Cluster3	CIMP-L	WHITE		NO
TCGA-FD-A5BX-01	82	Male	High Grade	Stage IV	MX	N1	T3	3.25	Recurred/Progressed	5.68	1	Cluster2	CIMP-L	WHITE		NO
TCGA-4Z-AA7O-01	64	Male	High Grade	Stage II	M0	N0	T2	16.82	DiseaseFree	16.82	0	Cluster3	CIMP-L	BLACK OR AFRICAN AMERICAN		NO
TCGA-E7-A4XJ-01	66	Male	High Grade	Stage II	M0	N0	T2	NA		2.23	1	Cluster3	CIMP-L	ASIAN		NO
TCGA-CF-A1HS-01	75	Female	High Grade	Stage III	M0	N0	T3	4.37	Recurred/Progressed	12.55	0	Cluster2	CIMP-L	ASIAN		NO
TCGA-XF-A9SU-01	74	Female	High Grade	Stage IV	MX	N1	T3	3.38	Recurred/Progressed	5.98	1	Cluster2	CIMP-L	WHITE		NO
TCGA-CF-A47V-01	52	Male	High Grade	Stage II	M0	N0	T2	12.45	DiseaseFree	12.45	0	Cluster2	CIMP-L	ASIAN		NO
TCGA-XF-AAMT-01	75	Female	High Grade	Stage IV	MX	N2	T3	NA		2.96	1	Cluster2	CIMP-L	WHITE	Leukemia-NOS	YES
TCGA-XF-AAN3-01	76	Male	High Grade	Stage IV	MX	N2	T3	86.24	DiseaseFree	86.24	0	Cluster3	CIMP-L	WHITE	Gastric	YES
TCGA-GC-A3BM-01	70	Male	High Grade	Stage II	M0	N0	T2	NA		21.39	1	Cluster2	CIMP-L	WHITE		NO
TCGA-GU-A766-01	62	Male	High Grade	Stage II	MX	N0	T2	15.77	DiseaseFree	15.77	0	Cluster2	CIMP-L	WHITE	Prostate|Prostate|Lung/Bronchus	YES
TCGA-E7-A3X6-01	70	Male	Low Grade	Stage II	M0	NX	T2	12.12	Recurred/Progressed	29.7	1	Cluster2	CIMP-L	WHITE		NO
TCGA-CF-A9FL-01	85	Male	High Grade	Stage III	M0	N0	T3	10.58	Recurred/Progressed	18.56	1	Cluster2	CIMP-L	ASIAN		NO
TCGA-XF-AAMH-01	80	Male	High Grade	Stage IV	MX	N1	T3	10.28	Recurred/Progressed	11.3	1	Cluster2	CIMP-L	WHITE		NO
TCGA-G2-AA3D-01	60	Male	High Grade	Stage IV	M0	N2	T3	70.27	DiseaseFree	70.27	0	Cluster2	CIMP-L	WHITE	Breast-Fem	YES
TCGA-ZF-A9R5-01	59	Male	High Grade	Stage III	M0	N0	T3	35.81	DiseaseFree	35.81	0	Cluster2	CIMP-L	WHITE	Lung/Bronchus	YES
TCGA-XF-AAMF-01	68	Male	High Grade	Stage IV	MX	N2	T4	5.16	Recurred/Progressed	10.81	1	Cluster3	CIMP-L	WHITE	Lung/Bronchus	YES
TCGA-CU-A0YR-01	83	Male	High Grade	Stage IV	M0	N2	T2	7.56	Recurred/Progressed	15.11	1	Cluster2	CIMP-L	WHITE	Bladder|Prostate	YES
TCGA-HQ-A2OF-01	52	Female	High Grade	Stage III	M0	N0	T3	29.8	Recurred/Progressed	63.96	0	Cluster3	CIMP-L		Gastric	YES
TCGA-FD-A43P-01	74	Male	High Grade	Stage II	MX	N0	T2	27.33	DiseaseFree	27.33	0	Cluster2	CIMP-L	BLACK OR AFRICAN AMERICAN		NO
TCGA-XF-A9ST-01	68	Male	High Grade	Stage III	MX	N0	T3	NA		4.2	1	Cluster3	CIMP-L	WHITE		NO
TCGA-CF-A47S-01	41	Male	Low Grade	Stage II	M0	N0	T2	10.94	DiseaseFree	10.94	0	Cluster2	CIMP-L	ASIAN		NO
TCGA-DK-A2I1-01	73	Female	High Grade	Stage II	M0	N0	T2	17.94	DiseaseFree	17.94	0	Cluster2	CIMP-L	WHITE		NO
TCGA-FD-A3B7-01	66	Male	High Grade	Stage III	MX	N0	T3	3.61	Recurred/Progressed	4.01	1	Cluster2	CIMP-L	BLACK OR AFRICAN AMERICAN		NO
TCGA-FD-A6TE-01	54	Male	High Grade	Stage IV	MX	N2	T3	10.55	Recurred/Progressed	12.35	0	Cluster3	CIMP-L	WHITE		NO
TCGA-UY-A78K-01	60	Male	High Grade	Stage IV	MX	N2		NA		17.61	1	Cluster3	CIMP-L	WHITE	[Not Available]|[Not Available]	YES
TCGA-DK-A6B1-01	67	Male	High Grade	Stage II	M0	N0	T2	67.31	DiseaseFree	67.31	0	Cluster3	CIMP-L	WHITE	Gastric|Prostate	YES
TCGA-FD-A5BU-01	76	Female	High Grade	Stage II	MX	N0	T2	19.32	DiseaseFree	19.32	0	Cluster2	CIMP-L	BLACK OR AFRICAN AMERICAN	Ovary-NOS	YES
TCGA-BT-A2LA-01	54	Male	High Grade	Stage III	M0	N0	T3	17.15	DiseaseFree	17.15	0	Cluster1	CIMP-L	WHITE	Colon|Melanoma	YES
TCGA-FD-A43U-01	70	Male	High Grade	Stage IV	MX	N2	T4	16.33	Recurred/Progressed	20.89	0	Cluster2	CIMP-L	WHITE		NO
TCGA-ZF-AA58-01	61	Female	High Grade	Stage IV	MX	N2	T3	54.17	DiseaseFree	54.17	0	Cluster2	CIMP-L	WHITE	Bladder	YES
TCGA-E7-A6MF-01	37	Male	Low Grade	Stage II	M0	NX	T2	24.64	DiseaseFree	24.64	0	Cluster2	CIMP-L	ASIAN		NO
TCGA-XF-AAMR-01	48	Male	High Grade	Stage III	MX	N0	T3	91.66	DiseaseFree	91.66	0	Cluster3	CIMP-L	WHITE		NO
TCGA-GD-A3OS-01	54	Female	High Grade	Stage II	MX	NX		16.39	Recurred/Progressed	20.96	0	Cluster2	CIMP-L	WHITE		NO
TCGA-XF-AAMJ-01	70	Male	High Grade	Stage III	M0	N0	T3	NA		54.86	1	Cluster3	CIMP-L	ASIAN		NO
TCGA-E5-A2PC-01	61	Female	High Grade	Stage IV	MX	N1	T2	43.56	DiseaseFree	43.56	0	Cluster2	CIMP-L	WHITE	Lung/Bronchus	YES
TCGA-DK-A3IT-01	62	Male	High Grade	Stage III	M0	N0	T3	21.29	DiseaseFree	21.29	0	Cluster2	CIMP-L	WHITE		NO
TCGA-DK-A6AV-01	82	Female	High Grade	Stage II	M0	N0	T2	64.13	DiseaseFree	64.13	0	Cluster3	CIMP-L	ASIAN	Colon	YES
TCGA-BT-A20Q-01	73	Male	High Grade	Stage IV	M0	N2	T3	NA		19.48	1	Cluster3	CIMP-L	WHITE		NO
TCGA-CU-A3KJ-01	75	Male	High Grade	Stage III	M0	N0	T3	5.45	Recurred/Progressed	18.46	0	Cluster2	CIMP-L	WHITE		NO
TCGA-BL-A5ZZ-01	80	Female	High Grade	Stage III	MX	N0	T4	7.95	Recurred/Progressed	12.39	0	Cluster2	CIMP-L	WHITE		NO
TCGA-K4-A4AC-01	83	Male	High Grade	Stage II	MX	N0	T2	5.58	Recurred/Progressed	9.13	1	Cluster1	CIMP-L	WHITE		NO
TCGA-H4-A2HQ-01	64	Female	High Grade	Stage IV	M1	NX		12.81	Recurred/Progressed	19.38	0	Cluster2	CIMP-L	BLACK OR AFRICAN AMERICAN	Cervix	YES
TCGA-XF-A9T2-01	54	Male	High Grade	Stage III	MX	N0	T3	NA		18.89	1	Cluster2	CIMP-L	WHITE	GI	YES
TCGA-HQ-A5ND-01	78	Male	High Grade	Stage IV	M0	N1	T3	2.76	Recurred/Progressed	9	1	Cluster2	CIMP-L			NO
TCGA-BT-A20O-01	75	Male	High Grade	Stage III	MX	N0	T3	10.35	Recurred/Progressed	12.16	1	Cluster2	CIMP-L	WHITE		NO
TCGA-DK-A1AB-01	74	Female	High Grade	Stage IV	M0	N2	T4	11.96	Recurred/Progressed	16.69	1	Cluster2	CIMP-L	WHITE	Liver-Primary-NOS|Pancreas	YES
TCGA-XF-AAN5-01	61	Female	High Grade	Stage III	MX	N0	T3	75.33	DiseaseFree	75.33	0	Cluster3	CIMP-L	WHITE		NO
TCGA-ZF-AA5N-01	62	Female	High Grade	Stage IV	M1	NX	T2	NA		5.52	1	Cluster3	CIMP-L	WHITE	Ovary-NOS|Lung/Bronchus	YES
TCGA-FD-A3N6-01	43	Female	High Grade	Stage II	MX	N0	T2	27.96	DiseaseFree	27.96	0	Cluster3	CIMP-L	BLACK OR AFRICAN AMERICAN	Prostate	YES
TCGA-K4-A5RJ-01	75	Male	High Grade	Stage II	MX	N0	T2	17.71	DiseaseFree	17.71	0	Cluster2	CIMP-L	WHITE		NO
TCGA-GU-A763-01	72	Male	High Grade	Stage III	M0	N0	T4	9.95	Recurred/Progressed	32.75	0	Cluster2	CIMP-L	WHITE	Ovary-NOS	YES
TCGA-FJ-A871-01	49	Male	High Grade	Stage III	MX	NX	T3	3.48	Recurred/Progressed	8.94	1	Cluster2	CIMP-L	WHITE		NO
TCGA-K4-A3WV-01	77	Female	High Grade	Stage II	MX	N0	T2	21.22	DiseaseFree	21.22	0	Cluster2	CIMP-L	WHITE		NO
TCGA-ZF-AA54-01	71	Male	High Grade	Stage III	MX	NX	T3	NA		19.38	1	Cluster2	CIMP-L	WHITE		NO
TCGA-YC-A9TC-01	71	Male	High Grade	Stage IV	M1			NA		0.66	1	Cluster2	CIMP-L	WHITE	Breast-Fem	YES
TCGA-FD-A3SP-01	60	Male	High Grade	Stage III	MX	N0	T3	25.72	DiseaseFree	25.72	0	Cluster2	CIMP-L	WHITE	Colon|[Not Available]	YES
TCGA-XF-A9SG-01	81	Male	High Grade	Stage II	MX	N0	T2	48.59	DiseaseFree	48.59	0	Cluster3	CIMP-L			NO
TCGA-DK-AA6X-01	63	Male	High Grade	Stage II	M0	N0		15.34	DiseaseFree	15.34	0	Cluster2	CIMP-L	WHITE	Multiple Myeloma|Colon	YES
TCGA-2F-A9KO-01	63	Male	High Grade	Stage IV	M0	N1	T3	21.39	Recurred/Progressed	24.11	1	Cluster3	CIMP-L	WHITE		NO
TCGA-CU-A0YN-01	60	Male	High Grade	Stage III	M0	N0	T3	NA		12.91	1	Cluster3	CIMP-L	WHITE		NO
TCGA-CF-A5U8-01	59		Low Grade	Stage II	M0	N0	T2	13.11	DiseaseFree	13.11	0	Cluster2	CIMP-L			NO
TCGA-DK-A1A7-01	67	Female	High Grade	Stage IV	M0	N2	T3	3.68	Recurred/Progressed	18.4	0	Cluster3	CIMP-L	WHITE	Breast-Fem|Lymphoma	YES
TCGA-E7-A677-01	81	Male	Low Grade	Stage II	M0	N0	T2	26.94	DiseaseFree	26.94	0	Cluster3	CIMP-L	ASIAN		NO
TCGA-5N-A9KI-01	76	Female	High Grade	Stage III	MX	NX	T4	NA		2.5	1	Cluster3	CIMP-L	WHITE		NO
TCGA-FT-A3EE-01	80	Female	High Grade	Stage III	MX	N0	T4	NA		3.25	1	Cluster3	CIMP-L	WHITE		NO
TCGA-BT-A0YX-01	70	Female	High Grade	Stage III	M0	N0	T3	10.71	Recurred/Progressed	13.14	1	Cluster2	CIMP-L	WHITE	Prostate|Colon	YES
TCGA-FD-A6TK-01	60	Male	High Grade	Stage III	MX	N0	T3	10.84	DiseaseFree	10.84	0	Cluster2	CIMP-L	WHITE		NO
TCGA-DK-A6AW-01	70	Male	High Grade	Stage II	M0	N0	T2	53.25	DiseaseFree	53.25	0	Cluster3	CIMP-L	WHITE		NO
TCGA-FJ-A3ZE-01	65	Male	High Grade	Stage IV	M1	N3		4.99	Recurred/Progressed	10.64	1	Cluster2	CIMP-L	WHITE		NO
TCGA-DK-A1AF-01	84	Female	High Grade	Stage IV	M0	N2	T3	17.35	Recurred/Progressed	17.61	0	Cluster2	CIMP-L	WHITE	Liver-Primary-NOS|Liver-Primary-NOS	YES
TCGA-ZF-AA4U-01	70	Male	High Grade	Stage III	MX	NX	T4	6.54	Recurred/Progressed	8.61	1	Cluster2	CIMP-L	WHITE		NO
TCGA-K4-A83P-01	77	Male		Stage IV	MX	N1	T4	2.92	Recurred/Progressed	16.26	0	Cluster2	CIMP-L	WHITE		NO
TCGA-XF-A9SX-01	63	Female	High Grade	Stage IV	MX	N2	T3	15.6	Recurred/Progressed	23.62	1	Cluster3	CIMP-L	WHITE	Esophagus	YES
TCGA-C4-A0F0-01	60	Male	High Grade	Stage II	M0	N0	T2	1.94	DiseaseFree	1.94	0	Cluster2	CIMP-L			NO
TCGA-FD-A3SL-01	60	Male	High Grade	Stage IV	M1	N2	T4	8.54	Recurred/Progressed	23.39	1	Cluster2	CIMP-L	WHITE	Lung/Bronchus|Colon	YES
TCGA-XF-A9SH-01	65	Female	High Grade	Stage II	M0	N0	T2	17.97	Recurred/Progressed	64.75	1	Cluster2	CIMP-L	ASIAN		NO
TCGA-E7-A7DU-01	73	Male	Low Grade	Stage III	M0	N0	T3	0.92	DiseaseFree	0.92	0	Cluster2	CIMP-L	WHITE		NO
TCGA-CF-A7I0-01	54	Male	Low Grade	Stage II	M0	N0	T2	12.09	DiseaseFree	12.09	0	Cluster2	CIMP-L	ASIAN		NO
TCGA-K4-A6FZ-01	75	Female	High Grade	Stage III	MX	N0	T3	1.81	DiseaseFree	1.81	0	Cluster3	CIMP-L	WHITE		NO
TCGA-XF-A9T4-01	48	Male	High Grade	Stage IV	MX	N1	T2	10.09	Recurred/Progressed	16.26	1	Cluster2	CIMP-L	WHITE		NO
TCGA-UY-A8OC-01	90	Male	High Grade	Stage IV	MX	N1	T4	1.05	Recurred/Progressed	3.02	1	Cluster3	CIMP-L	WHITE		NO
TCGA-C4-A0F1-01	71	Male	High Grade	Stage III	M0	N0	T3	2.92	DiseaseFree	2.92	0	Cluster2	CIMP-L			NO
TCGA-GC-A3RB-01	54	Male	High Grade	Stage III	M0	N0	T3	19.12	DiseaseFree	19.12	0	Cluster2	CIMP-L	WHITE		NO
TCGA-DK-A3IV-01	60	Male	High Grade	Stage II	M0	NX		6.96	Recurred/Progressed	9.66	1	Cluster3	CIMP-L	WHITE	Prostate|Lung/Bronchus	YES
TCGA-DK-A6B5-01	45	Male	High Grade	Stage IV	M0	N2	T4	50.66	DiseaseFree	50.66	0	Cluster2	CIMP-L	WHITE	Pancreas|Lung/Bronchus	YES
TCGA-CF-A47T-01	58	Female	Low Grade	Stage II	M0	N0	T2	4.57	Recurred/Progressed	12.65	1	Cluster2	CIMP-L	ASIAN		NO
TCGA-XF-AAN0-01	68	Male	High Grade	Stage IV	M0	N2	T4	19.81	Recurred/Progressed	56.44	1	Cluster3	CIMP-L	WHITE	Lung/Bronchus	YES
TCGA-UY-A78P-01	78	Female	High Grade	Stage II	MX	N0	T2	78.19	DiseaseFree	78.19	0	Cluster2	CIMP-L	WHITE		NO
TCGA-DK-AA6T-01	63	Male	High Grade	Stage II	M0	N0		18.79	DiseaseFree	18.79	0	Cluster2	CIMP-L	WHITE		NO
TCGA-FD-A43X-01	84	Male	High Grade	Stage II	MX	N0	T2	3.61	DiseaseFree	3.61	0	Cluster2	CIMP-L	WHITE		NO
TCGA-XF-AAN8-01	74	Female	High Grade	Stage III	MX	N0	T3	NA		3.88	1	Cluster2	CIMP-L	WHITE		NO
TCGA-XF-A8HC-01	79	Male	High Grade	Stage IV	MX	N2	T3	NA		6.57	1	Cluster3	CIMP-L	ASIAN	Ovary-NOS	YES
TCGA-DK-AA74-01	75	Male	High Grade	Stage III	M0	N0	T3	56.11	DiseaseFree	56.11	0	Cluster2	CIMP-L	WHITE	Cervix|Breast-Fem	YES
TCGA-XF-A8HE-01	47	Male	High Grade	Stage III	MX	N0	T3	125.39	DiseaseFree	125.39	0	Cluster2	CIMP-L	WHITE	Ovary-NOS	YES
TCGA-FD-A3SQ-01	62	Male	High Grade	Stage IV	MX	N2	T3	36.86	Recurred/Progressed	46.75	1	Cluster2	CIMP-L	WHITE	Bladder|Breast-Fem|Breast-Fem	YES
TCGA-BT-A20T-01	63	Male	High Grade	Stage IV	M0	N1	T3	10.32	Recurred/Progressed	14.88	1	Cluster2	CIMP-L	WHITE		NO
TCGA-G2-A3IB-01	66	Male	High Grade	Stage II	MX	NX		NA		7.23	1	Cluster2	CIMP-L	BLACK OR AFRICAN AMERICAN		NO
TCGA-CF-A5UA-01	67	Male	Low Grade	Stage II	M0	N0	T2	11.99	DiseaseFree	11.99	0	Cluster2	CIMP-L	ASIAN		NO
TCGA-DK-A1A3-01	60	Male	High Grade	Stage IV	M0	N2	T3	NA		21.85	1	Cluster2	CIMP-L	WHITE		NO
TCGA-ZF-AA5P-01	65	Male	High Grade	Stage IV	M0	N2	T2	12.22	DiseaseFree	12.22	0	Cluster2	CIMP-L	WHITE	Prostate	YES
TCGA-CU-A72E-01	76	Male	High Grade	Stage IV	M0	N2	T3	8.41	Recurred/Progressed	13.57	1	Cluster2	CIMP-L	WHITE	Head/Face/Neck|Lung/Bronchus	YES
TCGA-BT-A20W-01	71	Male	High Grade	Stage II	M0	N0	T2	NA		8.34	1	Cluster3	CIMP-L	WHITE		NO
TCGA-E7-A5KF-01	67	Male	Low Grade	Stage II	M0	N0	T2	0.66	DiseaseFree	0.66	0	Cluster2	CIMP-L	ASIAN	Bladder	YES
TCGA-ZF-A9RD-01	75	Female	High Grade	Stage IV	MX	N2	T3	NA		13.4	1	Cluster2	CIMP-L	WHITE		NO
TCGA-BT-A42E-01	74	Male	High Grade	Stage III	M0	N0	T3	36.4	DiseaseFree	36.4	0	Cluster3	CIMP-L	WHITE		NO
TCGA-FD-A3B3-01	74	Female	High Grade	Stage III	MX	N0	T3	NA		32	1	Cluster2	CIMP-L	WHITE	Colon	YES
TCGA-ZF-A9RN-01	67	Female	High Grade	Stage III	M0	NX	T3	16.95	Recurred/Progressed	20.2	1	Cluster2	CIMP-L	WHITE		NO
TCGA-DK-A3IM-01	76	Male	High Grade	Stage III	M0	N0	T3	6.6	Recurred/Progressed	8.15	1	Cluster1	CIMP-L	WHITE	Leukemia-NOS	YES
TCGA-DK-A2I2-01	63	Female	High Grade	Stage IV	M0	N3	T3	5.35	Recurred/Progressed	7.79	1	Cluster2	CIMP-L	WHITE	Breast-Fem	YES
TCGA-DK-A2I6-01	81	Male	High Grade	Stage IV	M0	N1	T2	87.25	DiseaseFree	87.25	0	Cluster2	CIMP-L	WHITE	Lung/Bronchus|Lung/Bronchus|Colon	YES
TCGA-K4-A5RH-01	69	Male	High Grade	Stage III	MX	N0	T3	6.8	Recurred/Progressed	9.07	0	Cluster2	CIMP-L	WHITE		NO
TCGA-FD-A6TG-01	73	Male	High Grade	Stage IV	MX	N2	T3	NA		3.06	1	Cluster3	CIMP-L	WHITE		NO
TCGA-GV-A3QH-01	67	Male	High Grade	Stage II	MX	NX		4.11	Recurred/Progressed	8.48	1	Cluster2	CIMP-L	WHITE	Bladder|Kidney-except Pelvis	YES
TCGA-GV-A6ZA-01	54	Male	High Grade	Stage II	MX	N0	T2	22.7	DiseaseFree	22.7	0	Cluster3	CIMP-L	WHITE		NO
TCGA-ZF-AA4W-01	56	Male	High Grade	Stage III	MX	N0	T3	55.16	Recurred/Progressed	60.12	0	Cluster2	CIMP-L	WHITE		NO
TCGA-XF-AAN2-01	73	Male	High Grade	Stage II	MX	N0	T2	NA		61.4	1	Cluster2	CIMP-L	WHITE	Lung/Bronchus	YES
TCGA-XF-A9SL-01	69	Male	High Grade	Stage IV	MX	N2	T3	NA		66.36	1	Cluster2	CIMP-L	WHITE	Multiple Myeloma	YES
TCGA-FD-A3B5-01	86	Male	High Grade	Stage IV	MX	N1	T2	NA		8.94	1	Cluster2	CIMP-L	BLACK OR AFRICAN AMERICAN	Breast-Fem|NOS	YES
TCGA-ZF-A9RE-01	78	Female	High Grade	Stage II	MX			NA		3.48	1	Cluster2	CIMP-L	WHITE		NO
TCGA-GU-A42R-01	68	Male	High Grade	Stage IV	MX	N2	T4	2.99	Recurred/Progressed	18.96	1	Cluster2	CIMP-L	WHITE		NO
TCGA-FD-A5BY-01	63	Female	High Grade	Stage III	MX	N0	T3	8.25	DiseaseFree	8.25	0	Cluster3	CIMP-L	WHITE	Pancreas|Leukemia-NOS	YES
TCGA-KQ-A41N-01	73	Male	High Grade	Stage III	M0	N0	T3	52.69	DiseaseFree	52.69	0	Cluster2	CIMP-L	BLACK OR AFRICAN AMERICAN		NO
TCGA-XF-AAML-01	75	Male	High Grade	Stage II	MX	N0	T2	NA		7.62	1	Cluster3	CIMP-L	WHITE		NO
TCGA-XF-A9SI-01	73	Female	High Grade	Stage II	MX	N0	T2	79.6	DiseaseFree	79.6	0	Cluster2	CIMP-L	ASIAN		NO
TCGA-E7-A7PW-01	63	Male	High Grade	Stage III	M0	NX	T3	5.72	Recurred/Progressed	13.67	0	Cluster3	CIMP-L	ASIAN		NO
TCGA-XF-A9SJ-01	83	Male	High Grade	Stage IV	MX	N2	T3	NA		3.22	1	Cluster3	CIMP-L	WHITE	Breast-Fem	YES
TCGA-FD-A3SM-01	70	Male	High Grade	Stage IV	M1	N2	T3	4.73	Recurred/Progressed	17.97	1	Cluster2	CIMP-L	WHITE	Lung/Bronchus	YES
TCGA-GC-A3RD-01	83	Female	High Grade	Stage III	M0	N0	T3	14.06	DiseaseFree	14.06	0	Cluster2	CIMP-L	WHITE		NO
TCGA-E7-A3Y1-01	57	Male	Low Grade	Stage II	M0	N0		5.35	DiseaseFree	5.35	0	Cluster2	CIMP-L	WHITE		NO
TCGA-C4-A0F7-01	77	Male	High Grade	Stage IV	M0	N2	T4	NA		2.04	1	Cluster3	CIMP-L			NO
TCGA-DK-A3WY-01	67	Female	High Grade	Stage III	M0	N0	T3	163.17	DiseaseFree	163.17	0	Cluster2	CIMP-L	WHITE		NO
TCGA-DK-A1AG-01	65	Male	High Grade	Stage III	M0	N0	T3	15.6	DiseaseFree	15.6	0	Cluster2	CIMP-L	WHITE	Bladder|Bladder	YES
TCGA-FD-A62N-01	69	Male	High Grade	Stage III	MX	N0	T3	2.69	DiseaseFree	2.69	0	Cluster3	CIMP-L	ASIAN		NO
TCGA-XF-A9T5-01	78	Female	High Grade	Stage IV	MX	N1	T3	27.83	Recurred/Progressed	66.59	0	Cluster2	CIMP-L	WHITE	Prostate	YES
TCGA-GU-AATP-01	74	Male	High Grade	Stage IV	MX	N2	T2	28.29	Recurred/Progressed	32.95	0	Cluster2	CIMP-L	WHITE	Lymphoma|Colon	YES
TCGA-4Z-AA82-01	59	Male	High Grade	Stage IV	M0	N1	T2	37.78	Recurred/Progressed	51.12	1	Cluster2	CIMP-L	BLACK OR AFRICAN AMERICAN		NO
TCGA-4Z-AA86-01	66	Male	High Grade	Stage IV	M0	N1	T3	4.47	Recurred/Progressed	10.22	1	Cluster2	CIMP-L	BLACK OR AFRICAN AMERICAN		NO
TCGA-GV-A3JW-01	74	Male	High Grade	Stage II	MX	NX	T2	8.9	Recurred/Progressed	21.32	0	Cluster2	CIMP-L	WHITE		NO
TCGA-GC-A3WC-01	80	Female	High Grade	Stage III	MX	N0	T3	17.74	DiseaseFree	17.74	0	Cluster2	CIMP-L	WHITE	Gallbladder|Prostate|Multiple Myeloma	YES
TCGA-ZF-A9R3-01	53	Female	High Grade	Stage II	M0	NX	T2	30.12	Recurred/Progressed	31.18	1	Cluster2	CIMP-L	WHITE		NO
TCGA-4Z-AA7Q-01	79	Male	High Grade	Stage III	M0	NX	T3	NA		16.75	1	Cluster2	CIMP-L	WHITE	Gallbladder	YES
TCGA-DK-AA6M-01	64	Female	High Grade	Stage II	M0	N0	T2	51.97	DiseaseFree	51.97	0	Cluster3	CIMP-L	WHITE	Lung/Bronchus	YES
TCGA-DK-A1AA-01	57	Male	High Grade	Stage III	M0	N0	T3	18.99	DiseaseFree	18.99	0	Cluster2	CIMP-L	WHITE	Prostate|Colon|Rectum|Lung/Bronchus|Melanoma	YES
TCGA-PQ-A6FN-01	78	Female	High Grade	Stage III	MX	N0	T3	16.66	DiseaseFree	16.66	0	Cluster2	CIMP-L	WHITE		NO
TCGA-4Z-AA7W-01	55	Male	High Grade	Stage II	M0	N0	T2	24.97	Recurred/Progressed	27.6	0	Cluster2	CIMP-L	WHITE		NO
TCGA-SY-A9G5-01	66	Male	High Grade	Stage III	M0	N0	T4	38.96	DiseaseFree	38.96	0	Cluster3	CIMP-L	WHITE		NO
TCGA-BT-A42F-01	64	Male	High Grade	Stage IV	MX	N1	T4	28.38	DiseaseFree	28.38	0	Cluster2	CIMP-L	WHITE		NO
TCGA-BT-A20J-01	75	Male	High Grade	Stage II	MX	N0	T2	14.19	Recurred/Progressed	19.02	1	Cluster2	CIMP-L	WHITE		NO
TCGA-XF-A8HI-01	57	Female	High Grade	Stage IV	MX	N2	T2	15.37	Recurred/Progressed	17.87	1	Cluster2	CIMP-L	WHITE		NO
TCGA-GU-A767-01	81	Male	High Grade	Stage IV	MX	N2	T3	NA		4.73	1	Cluster2	CIMP-L	WHITE		NO
TCGA-XF-AAMW-01	79	Female	High Grade	Stage IV		N0	T2	NA		8.31	1	Cluster2	CIMP-L	WHITE	Pancreas|Colon	YES
TCGA-CF-A3MF-01	34	Male	Low Grade	Stage III	M0	N0	T3	12.58	DiseaseFree	12.58	0	Cluster3	CIMP-L	ASIAN		NO
TCGA-2F-A9KR-01	59	Female	High Grade	Stage III	M0	N0	T3	101.38	Recurred/Progressed	104.57	1	Cluster2	CIMP-L			NO
TCGA-FD-A3NA-01	60	Male	High Grade	Stage II	MX	N0	T2	43.96	Recurred/Progressed	60.61	0	Cluster2	CIMP-L	WHITE		NO
TCGA-E7-A678-01	55	Male	Low Grade	Stage III	M0	N0	T3	26.22	DiseaseFree	26.22	0	Cluster2	CIMP-L	ASIAN		NO
TCGA-XF-A9T0-01	68	Male	High Grade	Stage III	MX	N0	T3	26.25	DiseaseFree	26.25	0	Cluster2	CIMP-L	WHITE	Breast-Fem	YES
TCGA-DK-A6B6-01	57	Male	High Grade	Stage II	MX	NX		36.63	DiseaseFree	36.63	0	Cluster2	CIMP-L	WHITE	Colon|CNS	YES
TCGA-ZF-AA5H-01	60	Female	High Grade	Stage IV	M0	N2	T3	14.75	Recurred/Progressed	29.47	0	Cluster3	CIMP-L	WHITE	Lung/Bronchus	YES
TCGA-DK-A3WW-01	57	Male	High Grade	Stage III	M0	N0	T3	20.8	DiseaseFree	20.8	0	Cluster2	CIMP-L	WHITE		NO
TCGA-FD-A43S-01	71	Female	High Grade	Stage III	MX	N0	T3	14.95	DiseaseFree	14.95	0	Cluster2	CIMP-L	WHITE		NO
TCGA-CF-A27C-01	52	Male	High Grade	Stage III	M0	N0	T3	13.96	DiseaseFree	13.96	0	Cluster3	CIMP-L	ASIAN		NO
TCGA-XF-A9SM-01	76	Male	High Grade	Stage III	MX	N0	T3	34.43	DiseaseFree	34.43	0	Cluster1	CIMP-L	WHITE		NO
TCGA-FD-A3N5-01	69	Male	High Grade	Stage II	MX	N0	T2	11.37	Recurred/Progressed	22.5	1	Cluster3	CIMP-L	BLACK OR AFRICAN AMERICAN	Lung/Bronchus	YES
TCGA-ZF-AA4N-01	74	Male	High Grade	Stage II				NA		2.89	1	Cluster2	CIMP-L	WHITE		NO
TCGA-DK-A3IQ-01	74	Male	High Grade	Stage III	M0	N0	T3	8.21	Recurred/Progressed	17.71	1	Cluster2	CIMP-L	WHITE	Breast-Fem|Lung/Bronchus|Colon|Kidney-except Pelvis|Multiple Myeloma	YES
TCGA-FD-A6TB-01	82	Male	High Grade	Stage III	MX	N0	T3	18.79	DiseaseFree	18.79	0	Cluster2	CIMP-L	WHITE		NO
TCGA-XF-A9T8-01	64	Male	High Grade	Stage III	MX	N0	T3	NA		13.73	1	Cluster3	CIMP-L	WHITE		NO
TCGA-4Z-AA7N-01	65	Male	High Grade	Stage III	M0	N0	T3	NA		44.91	1	Cluster2	CIMP-L	WHITE		NO
TCGA-KQ-A41S-01	87	Female	High Grade	Stage III	MX	NX	T4	1.15	DiseaseFree	1.15	0	Cluster3	CIMP-L	WHITE		NO
TCGA-FD-A43Y-01	65	Male	High Grade	Stage III	MX	N0	T4	NA		15.57	1	Cluster2	CIMP-L	WHITE	Prostate	YES
TCGA-CU-A5W6-01	70	Male	High Grade	Stage III	M0	N0	T4	NA		1.84	1	Cluster1	CIMP-L	WHITE	Breast-Fem	YES
TCGA-CF-A3MH-01	75	Male	Low Grade	Stage II	M0	N0	T2	13.07	DiseaseFree	13.07	0	Cluster2	CIMP-L	ASIAN		NO
TCGA-E7-A7XN-01	66	Male	High Grade	Stage III	M0	N0	T3	6.24	Recurred/Progressed	14.06	0	Cluster2	CIMP-L	ASIAN		NO
TCGA-FD-A5BV-01	47	Female	High Grade	Stage III	MX	N0	T3	4.4	Recurred/Progressed	5.35	1	Cluster3	CIMP-L	WHITE		NO
TCGA-FD-A3SJ-01	59	Male	High Grade	Stage IV	MX	N2	T2	18	Recurred/Progressed	24.28	1	Cluster2	CIMP-L	WHITE		NO
TCGA-XF-AAMQ-01	59	Female	High Grade	Stage II	MX	N0	T2	71.52	DiseaseFree	71.52	0	Cluster3	CIMP-L	WHITE		NO
TCGA-DK-A6B0-01	61	Male	High Grade	Stage II	M0	N0	T2	76.54	DiseaseFree	76.54	0	Cluster2	CIMP-L	WHITE	Breast-Fem|[Not Available]	YES
TCGA-CF-A9FM-01	50	Male	High Grade	Stage I	M0	N0	T1	13.07	DiseaseFree	13.07	0	Cluster2	CIMP-L	ASIAN		NO
TCGA-K4-A4AB-01	76	Male	High Grade	Stage III	MX	N0	T4	2.76	DiseaseFree	2.76	0	Cluster2	CIMP-L	WHITE		NO
TCGA-FD-A6TH-01	63	Male	High Grade	Stage IV	MX	N2	T3	4.14	Recurred/Progressed	4.3	1	Cluster3	CIMP-L	WHITE		NO
TCGA-DK-A3IL-01	79	Female	High Grade	Stage IV	M0	N2	T3	NA		13.57	1	Cluster3	CIMP-L	WHITE		NO
TCGA-FD-A3SO-01	68	Male	High Grade	Stage IV	MX	N1	T3	4.7	Recurred/Progressed	5.52	1	Cluster3	CIMP-L	WHITE	Colon	YES
TCGA-UY-A9PA-01	48	Male	High Grade	Stage III	MX	N0	T3	35.22	DiseaseFree	35.22	0	Cluster2	CIMP-L	WHITE		NO
TCGA-DK-A3WX-01	67	Female	High Grade	Stage III	M0	N0	T3	9.95	Recurred/Progressed	10.55	1	Cluster2	CIMP-L	WHITE	Breast-Fem|Uterine|Bladder|Lung/Bronchus	YES
TCGA-XF-A9SW-01	85	Male	High Grade	Stage IV	MX	N2	T3	NA		11.89	1	Cluster3	CIMP-L	WHITE	Prostate|Breast-Fem|Pancreas|Lung/Bronchus|Prostate|Breast-Fem	YES
TCGA-PQ-A6FI-01	70	Male	High Grade	Stage II	MX	N0	T2	12.22	DiseaseFree	12.22	0	Cluster2	CIMP-L	WHITE	Sarcoma	YES
TCGA-E7-A97Q-01	60	Female	High Grade	Stage IV	MX	N3	T4	NA		8.08	1	Cluster2	CIMP-L	WHITE		NO
TCGA-GC-A3I6-01	45	Male	High Grade	Stage III	M0	N0	T3	17.94	Recurred/Progressed	20.7	1	Cluster3	CIMP-L	WHITE		NO
TCGA-FD-A62S-01	60	Female	High Grade	Stage III	MX	N0	T3	10.05	Recurred/Progressed	13.34	1	Cluster2	CIMP-L	BLACK OR AFRICAN AMERICAN		NO
TCGA-XF-A8HB-01	50	Female	High Grade	Stage II	MX	N0	T2	45.01	DiseaseFree	45.01	0	Cluster3	CIMP-L		Lung/Bronchus	YES
TCGA-ZF-AA4V-01	66	Male	High Grade	Stage III	M0	N0	T3	59.33	DiseaseFree	59.33	0	Cluster3	CIMP-L	WHITE	Lung/Bronchus|Breast-Fem	YES
TCGA-GD-A2C5-01	53	Female	High Grade	Stage IV	MX	N2	T3	7.03	Recurred/Progressed	26.68	0	Cluster3	CIMP-L	WHITE	Lung/Bronchus	YES
TCGA-DK-A3IU-01	58	Male	High Grade	Stage II	M0	N0	T2	19.05	Recurred/Progressed	23.19	1	Cluster2	CIMP-L	WHITE	Prostate|Leukemia-NOS	YES
TCGA-G2-A2EF-01	50	Male	High Grade	Stage II	M0	N0		61.89	DiseaseFree	61.89	0	Cluster2	CIMP-L	WHITE	Prostate	YES
TCGA-G2-A2EC-01	58	Female	High Grade	Stage II	M0	N0		22.31	Recurred/Progressed	22.86	1	Cluster3	CIMP-L	BLACK OR AFRICAN AMERICAN	Prostate	YES
TCGA-FD-A6TD-01	77	Male	High Grade	Stage III	MX	N0	T3	NA		12.68	1	Cluster3	CIMP-L	WHITE		NO
TCGA-ZF-AA4R-01	67	Male	High Grade	Stage IV	MX	N1	T3	24.64	Recurred/Progressed	34.03	1	Cluster3	CIMP-L	WHITE	Testis|Breast-Fem|[Not Available]	YES
TCGA-XF-A9SZ-01	79	Male	High Grade	Stage IV	MX	N2	T3	28.06	Recurred/Progressed	28.22	1	Cluster2	CIMP-L	WHITE	GI|Leukemia-NOS	YES
TCGA-BT-A3PK-01	80	Male	High Grade	Stage II	MX	N0	T2	NA		9.95	1	Cluster2	CIMP-L	WHITE		NO
TCGA-XF-A9T3-01	69	Female	High Grade	Stage IV	MX	N2	T3	2.23	DiseaseFree	2.23	0	Cluster3	CIMP-L	WHITE		NO
TCGA-BT-A20U-01	70	Female	High Grade	Stage III	M0	N0	T3	NA		14.95	1	Cluster3	CIMP-L	WHITE		NO
TCGA-E7-A97P-01	73	Male	High Grade	Stage II	M0	NX	T2	NA		14.36	1	Cluster2	CIMP-L	ASIAN		NO
TCGA-GC-A3YS-01	61	Male	High Grade	Stage IV	MX	N1	T3	24.9	DiseaseFree	24.9	0	Cluster3	CIMP-L	WHITE	Bladder|Adrenal Cortical Tumor|Ovary-NOS	YES
TCGA-E7-A8O8-01	59	Male	High Grade	Stage II	M0	N0	T2	0.43	DiseaseFree	0.43	0	Cluster3	CIMP-L	ASIAN		NO
TCGA-GC-A3OO-01	79	Male	High Grade	Stage II	M0	N0	T2	15.8	DiseaseFree	15.8	0	Cluster2	CIMP-L	WHITE		NO
TCGA-CF-A8HY-01	59	Male	High Grade	Stage II	M0	N0	T2	11.33	DiseaseFree	11.33	0	Cluster2	CIMP-L	ASIAN		NO
TCGA-CF-A47Y-01	55	Male	Low Grade	Stage II	M0	N0	T2	12.25	DiseaseFree	12.25	0	Cluster2	CIMP-L	ASIAN		NO
TCGA-G2-A2EJ-01	56	Female	High Grade	Stage II	M0	N0		29.89	Recurred/Progressed	47.96	0	Cluster2	CIMP-L	WHITE		NO
TCGA-GU-A764-01	66	Male	High Grade	Stage II	MX	N0	T2	20.04	DiseaseFree	20.04	0	Cluster3	CIMP-L	WHITE	Colon|Colon	YES
TCGA-DK-AA6Q-01	61	Female	High Grade	Stage IV	M0	N1	T3	9.36	Recurred/Progressed	13.57	1	Cluster3	CIMP-L	WHITE	Breast-Fem	YES
TCGA-CF-A3MG-01	48	Male	Low Grade	Stage II	M0	N0	T2	12.12	DiseaseFree	12.12	0	Cluster3	CIMP-L	ASIAN		NO
TCGA-BT-A20X-01	56	Male	High Grade	Stage IV	M0	N2	T4	NA		8.25	1	Cluster2	CIMP-L	WHITE		NO
TCGA-FD-A5BT-01	84	Male	High Grade	Stage III	MX	N0	T3	NA		10.78	1	Cluster2	CIMP-L	WHITE		NO
TCGA-CF-A1HR-01	62	Male	High Grade	Stage III	M0	N0	T3	9.66	Recurred/Progressed	12.78	0	Cluster2	CIMP-L	ASIAN		NO
TCGA-ZF-AA52-01	70	Male	High Grade	Stage III	MX	NX	T3	NA		35.38	1	Cluster3	CIMP-L	WHITE		NO
TCGA-G2-A3IE-01	51	Male	High Grade	Stage II	MX	NX		NA		20.11	1	Cluster1	CIMP-L	WHITE	Lung/Bronchus	YES
TCGA-4Z-AA7M-01	65	Male	High Grade	Stage III	M0	N0	T3	16.26	DiseaseFree	16.26	0	Cluster2	CIMP-L	WHITE	Bladder|Uterine	YES
TCGA-E7-A519-01	72	Male	High Grade	Stage II	M0	NX	T2	16.69	DiseaseFree	16.69	0	Cluster2	CIMP-L	WHITE		NO
TCGA-GU-A42P-01	72	Male	High Grade	Stage IV	M0	N1	T3	NA		10.91	1	Cluster2	CIMP-L	WHITE	Cervix	YES
TCGA-S5-A6DX-01	83	Male	High Grade	Stage IV	MX	N2	T4	NA		1.84	1	Cluster2	CIMP-L	WHITE		NO
TCGA-GU-AATQ-01	68	Male	High Grade	Stage III	MX	N0	T3	NA		7	1	Cluster2	CIMP-L	WHITE		NO
TCGA-GD-A6C6-01	64	Male	High Grade	Stage III	MX	N0	T3	2.2	DiseaseFree	2.2	0	Cluster2	CIMP-L	WHITE	Colon|Colon|[Not Available]	YES
TCGA-GV-A3QF-01	79	Male	High Grade	Stage IV	MX	N2	T3	NA		20.27	1	Cluster3	CIMP-L	WHITE		NO
TCGA-BL-A13J-01	65	Male	High Grade	Stage IV	M0	N2	T4	NA		2.66	1	Cluster2	CIMP-L	WHITE	Lung/Bronchus	YES
TCGA-BL-A13I-01	57	Female	High Grade	Stage III	M0	N0	T3	7.1	Recurred/Progressed	7.33	1	Cluster2	CIMP-L	WHITE		NO
