# Supplementary material
Source: Research Square preprint supplement (doi:10.21203/rs.3.rs-8947218/v1)
Supplement: Supplementary file 8 [file 6340ccf337726106f26c8172.xlsx]

## Sheet: gsea_hallmark_result
	ID	Description	setSize	enrichmentScore	NES	pvalue	p.adjust	qvalues	rank	leading_edge	core_enrichment
HALLMARK_ALLOGRAFT_REJECTION	HALLMARK_ALLOGRAFT_REJECTION	ALLOGRAFT_REJECTION	199	-0.762794	-2.61873	0.00114286	0.00437445	0.00202606	7885	tags=68%	list=14%	signal=58%	IFNGR1/TAPBP/CTSS/HIF1A/CCL2/HLA-DMA/IL4R/THY1/HLA-E/INHBB/IL7/JAK2/IL13/STAT1/ICAM1/NCF4/BCAT1/TAP2/IL18/CCR1/IL27RA/HLA-G/IRF7/INHBA/DEGS1/HDAC9/FGR/TAP1/CCND2/TLR3/IL12B/NCK1/B2M/TGFB1/ELANE/SOCS1/HLA-DOA/HLA-A/NOS2/C2/FCGR2B/FAS/IL10/HCLS1/DYRK3/FLNA/HLA-DMB/GCNT1/CD40/CD247/HLA-DRA/CD74/NCR1/CCL7/NLRP3/ACHE/CCR2/ST8SIA4/EGFR/TIMP1/HLA-DQA1/CCL19/CD40LG/IL2RB/LCK/HLA-DOB/IGSF6/CRTAM/IL16/STAT…
HALLMARK_COMPLEMENT	HALLMARK_COMPLEMENT	COMPLEMENT	199	-0.623391	-2.14015	0.00114286	0.00437445	0.00202606	7744	tags=46%	list=14%	signal=40%	CTSV/CTSS/CDA/MSRB1/LIPA/CTSL/HPCAL4/LRP1/RHOG/COL4A2/JAK2/C4BPB/RASGRP1/CEBPB/ZEB1/CSRP1/PLA2G7/GP1BA/L3MBTL4/IRF7/CLU/SERPINE1/ERAP2/CASP4/PLAUR/GNG2/LAP3/ZFPM2/HNF4A/PHEX/MT3/C2/DGKG/SH2B3/FN1/MMP8/C1R/F3/DPP4/CFB/CTSB/ANXA5/C1S/C3/CFH/TIMP1/PSMB9/S100A12/SERPING1/PIK3CG/S100A9/CD40LG/PIK3R5/LCK/GNGT2/DOCK10/SERPINA1/CTSC/LCP2/GNB4/ACTN2/FCER1G/ME1/KCNIP3/CASP1/ITGAM/SERPINB2/FCN1/IL6/CDH13/HS…
HALLMARK_INTERFERON_GAMMA_RESPONSE	HALLMARK_INTERFERON_GAMMA_RESPONSE	INTERFERON_GAMMA_RESPONSE	199	-0.715861	-2.45761	0.00114286	0.00437445	0.00202606	9224	tags=63%	list=17%	signal=53%	SP110/NFKB1/LYSMD2/PLSCR1/ITGB7/LGALS3BP/NMI/PNP/METTL7B/STAT3/PSMB10/PSME2/VAMP5/IRF1/TAPBP/HIF1A/CCL2/PARP12/P2RY14/HLA-DMA/ARL4A/IL4R/IL7/TRIM21/MX1/JAK2/CD274/SOCS3/PSMB8/STAT1/ICAM1/TRIM14/EPSTI1/KLRK1/RTP4/SAMHD1/MARCH1/HLA-G/CIITA/IRF7/IFIH1/IFI35/MVP/IL18BP/CASP4/TAP1/LAP3/B2M/PML/CSF2RB/SOCS1/NAMPT/ISG15/HLA-A/XAF1/UBE2L6/HLA-B/FAS/BST2/SECTM1/DDX58/HLA-DRB1/RSAD2/OAS2/DDX60/C1R/IFI44L/I…
HALLMARK_MYOGENESIS	HALLMARK_MYOGENESIS	MYOGENESIS	198	-0.530441	-1.81913	0.00114679	0.00437445	0.00202606	11165	tags=51%	list=20%	signal=41%	MRAS/CD36/PC/CKMT2/CHRNA1/MYH8/MYH1/GSN/FKBP1B/ADCY9/EPHB3/MYH3/ACTA1/GADD45B/RB1/SGCD/CFD/MYOG/ITGB4/TNNI2/ADAM12/GJA5/REEP1/MYL7/MYF6/LAMA2/SORBS3/IGFBP7/SPARC/PTP4A3/AEBP1/MYL4/ST5/COL4A2/TNNT2/COL15A1/CSRP3/AK1/COL6A3/COL1A1/FXYD1/CACNA1H/COL3A1/MYOM1/CLU/TAGLN/SOD3/SORBS1/MYLK/STC2/MYOM2/BDKRB2/WWTR1/FST/MEF2C/CRYAB/SPDEF/TNNT3/TGFB1/SLN/GPX3/PTGIS/DTNA/NQO1/APLNR/COX7A1/ANKRD2/HSPB2/SGCG/IT…
HALLMARK_APICAL_JUNCTION	HALLMARK_APICAL_JUNCTION	APICAL_JUNCTION	193	-0.558858	-1.91278	0.00114811	0.00437445	0.00202606	10895	tags=46%	list=20%	signal=37%	AKT3/SDC3/CAP1/LIMA1/PFN1/MMP2/ACTB/CDH11/ACTA1/CD34/PARVA/SHC1/CNN2/ADAMTS5/ITGB4/NEGR1/BMP1/EPB41L2/SYK/SORBS3/BAIAP2/VWF/SGCE/ITGA3/NRXN2/ICAM5/THY1/COL16A1/JAM3/NFASC/CD274/SLIT2/GNAI1/VCAN/ICAM1/CDH4/CDH15/ITGA10/ZYX/FBN1/PECAM1/ACTN1/RRAS/CLDN5/TSPAN4/CNTN1/CDSN/MAPK11/DMP1/ITGA2/MYL9/FSCN1/ICAM2/SPEG/TRAF1/NEXN/EGFR/VCAM1/ACTG2/ADRA1B/CDH3/ADAM23/CLDN8/RAC2/ACTN2/LAMB3/CX3CL1/FLNC/SIRPA/CL…
HALLMARK_IL2_STAT5_SIGNALING	HALLMARK_IL2_STAT5_SIGNALING	IL2_STAT5_SIGNALING	195	-0.541172	-1.85405	0.00115075	0.00437445	0.00202606	11614	tags=48%	list=21%	signal=38%	CSF2/FURIN/IGF2R/S100A1/ODC1/CD81/ITGAV/DHRS3/PTGER2/SELP/PLAGL1/SPRY4/IRF6/GADD45B/SHE/PLSCR1/PNP/DRC1/CKAP4/RNH1/MAPKAPK2/ITIH5/IGF1R/SLC2A3/IFNGR1/CTSZ/ARL4A/TGM2/IL4R/FAH/ECM1/NCS1/NDRG1/CDCP1/TLR7/PLEC/IL13/AHNAK/AKAP2/GSTO1/TNFRSF1B/EMP1/PTH1R/CCND2/NFIL3/HIPK2/ENPP1/NRP1/IL1R2/SOCS1/MYC/ITGA6/IL10/CCR4/GLIPR2/IL1RL1/PRNP/LRRC8C/LRIG1/TRAF1/TNFRSF4/ADAM19/COL6A1/TNFRSF8/NT5E/TNFSF10/CD44/IL…
HALLMARK_KRAS_SIGNALING_DN	HALLMARK_KRAS_SIGNALING_DN	KRAS_SIGNALING_DN	194	-0.535154	-1.83165	0.00115075	0.00437445	0.00202606	7182	tags=38%	list=13%	signal=33%	THNSL2/GRID2/MX1/CELSR2/NPY4R/TCF7L1/CLPS/ALOX12B/GP1BA/SERPINA10/CLDN16/KRT13/CCR8/PRODH/OXT/IL12B/PTPRJ/TFF2/KCNMB1/PDE6B/SYNPO/RSAD2/IFI44L/EPHA5/P2RX6/RYR1/CDH16/CNTFR/TG/IL5/WNT16/ZBTB16/COPZ2/PTGFR/CD207/RYR2/CD40LG/HTR1B/SNCB/CLDN8/KRT4/EGF/HNF1A/ACTC1/GDNF/SERPINB2/NGB/BMPR1B/TGFB2/SGK1/CD80/PDCD1/SLC12A3/KLK7/CALML5/SLC6A14/IFNG/PKP1/NUDT11/NOS1/KLK8/AKR1B10/MEFV/CCNA1/NPHS1/KRT15/LGALS7…
HALLMARK_KRAS_SIGNALING_UP	HALLMARK_KRAS_SIGNALING_UP	KRAS_SIGNALING_UP	195	-0.588	-2.01449	0.00115075	0.00437445	0.00202606	8717	tags=46%	list=16%	signal=39%	ALDH1A3/ETV5/MAFB/RELN/SOX9/CTSS/TRIB2/F2RL1/PCP4/PLAU/TNNT2/SPARCL1/SPON1/ENG/PSMB8/IGF2/TNFRSF1B/EMP1/INHBA/TMEM158/PLEK2/HDAC9/GNG11/HSD11B1/CCND2/PLAUR/PECAM1/TMEM100/NRP1/SCG5/PRDM1/CIDEA/TMEM176A/CXCR4/ITGA2/ST6GAL1/LCP1/BIRC3/MALL/ANXA10/RETN/TMEM176B/HBEGF/CFB/TRAF1/PIGR/DCBLD2/NGF/CFH/USH1C/SCN1B/IKZF1/LAPTM5/GYPC/LY96/PDCD1LG2/TFPI/FCER1G/IL10RA/ITGB2/IL2RG/LAT2/MAP4K1/G0S2/CLEC4A/C3AR1…
HALLMARK_EPITHELIAL_MESENCHYMAL_TRANSITION	HALLMARK_EPITHELIAL_MESENCHYMAL_TRANSITION	EPITHELIAL_MESENCHYMAL_TRANSITION	197	-0.722662	-2.47598	0.00115607	0.00437445	0.00202606	9916	tags=71%	list=18%	signal=59%	CDH11/LAMC1/COL4A1/CD59/PLOD3/SERPINH1/GADD45B/LUM/P3H1/SAT1/SGCB/COMP/SGCD/MMP14/PRRX1/DST/FBLN2/EFEMP2/TNFRSF12A/ELN/IGFBP2/BMP1/ADAM12/GAS1/GREM1/LAMA2/SPARC/LOXL2/TGM2/ECM2/THY1/FSTL1/ECM1/COL16A1/LRP1/CXCL8/TPM1/NID2/COL4A2/COL11A1/PDGFRB/COL1A2/GEM/COL7A1/SLIT2/VCAN/SPOCK1/COL8A2/COL5A2/MXRA5/COL6A3/ACTA2/COL1A1/COL3A1/POSTN/FERMT2/HTRA1/SFRP4/PMEPA1/INHBA/SERPINE1/BGN/CALD1/DCN/TAGLN/THBS1…
HALLMARK_INFLAMMATORY_RESPONSE	HALLMARK_INFLAMMATORY_RESPONSE	INFLAMMATORY_RESPONSE	197	-0.681538	-2.33508	0.00115607	0.00437445	0.00202606	8060	tags=59%	list=14%	signal=51%	ITGB8/IRF1/TAPBP/HIF1A/CCL2/SLC7A1/IL4R/CXCL8/ADM/RHOG/TNFSF9/RASGRP1/TPBG/ICAM1/RTP4/GP1BA/TNFRSF1B/IL18/PCDH7/IRF7/INHBA/SERPINE1/BEST1/PLAUR/MEP1A/LPAR1/TLR3/IL12B/PTGIR/CSF3R/CD82/CLEC5A/NMUR1/NAMPT/MYC/APLNR/NPFFR2/OSM/PROK2/IL10/RGS1/BST2/GPR132/P2RX7/LAMP3/CXCR6/F3/HBEGF/PTAFR/CD40/KCNJ2/LDLR/DCBLD2/C5AR1/CCL7/ADORA2B/HAS2/MSR1/NLRP3/NOD2/PDE4B/GPR183/TIMP1/KCNA3/TNFAIP6/TNFSF10/SCN1B/IL2R…
HALLMARK_TNFA_SIGNALING_VIA_NFKB	HALLMARK_TNFA_SIGNALING_VIA_NFKB	TNFA_SIGNALING_VIA_NFKB	197	-0.596779	-2.04468	0.00115607	0.00437445	0.00202606	10509	tags=49%	list=19%	signal=40%	LITAF/KLF4/PLK2/IER3/PFKFB3/KLF10/CEBPD/GADD45B/EGR3/SAT1/PTPRE/PDLIM5/NFKB1/TNF/TNIP1/CFLAR/RELB/NFKB2/PNRC1/NINJ1/SERPINB8/IRF1/SLC2A3/KLF9/CCL2/PANX1/F2RL1/CXCL3/PLAU/ACKR3/TNFSF9/GEM/SOCS3/CEBPB/CLCF1/ICAM1/IL18/EGR1/PMEPA1/INHBA/SERPINE1/IFIH1/TAP1/JAG1/NFIL3/PLAUR/IL12B/IL6ST/CXCL2/NAMPT/MYC/DNAJB4/FJX1/EGR2/DDX58/BIRC3/IFIT2/DUSP1/FOSL1/F3/HBEGF/TRAF1/LDLR/PDE4B/KLF2/GPR183/TNFAIP6/SOD2/CD…
HALLMARK_APOPTOSIS	HALLMARK_APOPTOSIS	APOPTOSIS	160	-0.486471	-1.64292	0.00117647	0.00437445	0.00202606	11505	tags=40%	list=21%	signal=32%	TSPO/IGF2R/VDAC2/ETF1/TIMP2/FEZ1/HSPB1/PMAIP1/ANKH/IER3/MMP2/GSN/GNA15/MGMT/GADD45B/LUM/EGR3/SAT1/TNF/F2R/CFLAR/TNFRSF12A/IRF1/CYLD/IFNGR1/BCL2L10/PDGFRB/LEF1/ANXA1/IL18/EMP1/CLU/BGN/CDC25B/DCN/CASP4/TAP1/CCND2/IFNB1/PLCB2/GPX3/FAS/BIRC3/TIMP1/SOD2/TNFSF10/CD44/CAV1/IFITM3/CD2/DPYD/CASP1/CD69/IL6/TGFB2/EREG/ISG20/FASLG/PRF1/HGF/CD14/CD38/IGFBP6/CCNA1
HALLMARK_UV_RESPONSE_DN	HALLMARK_UV_RESPONSE_DN	UV_RESPONSE_DN	137	-0.474104	-1.56962	0.001221	0.00437445	0.00202606	11352	tags=40%	list=20%	signal=32%	SCHIP1/NOTCH2/AKT3/CAP2/MMP16/GJA1/SLC22A18/FYN/LAMC1/MET/MGMT/LTBP1/PDLIM5/NFKB1/ATP2B4/IGF1R/RND3/SLC7A1/COL11A1/PDGFRB/COL1A2/TGFBR2/ATXN1/COL5A2/COL1A1/COL3A1/SERPINE1/GRK5/FBLN5/LPAR1/NRP1/RGS4/KCNMA1/MYC/ANXA2/ABCC1/DUSP1/MAP1B/F3/IGFBP5/GCNT1/LDLR/ADORA2B/HAS2/PTGFR/BDNF/CELF2/NR3C1/ITGB3/CAV1/TFPI/SNAI2/EFEMP1/PIK3CD/MT1E
HALLMARK_IL6_JAK_STAT3_SIGNALING	HALLMARK_IL6_JAK_STAT3_SIGNALING	IL6_JAK_STAT3_SIGNALING	86	-0.714603	-2.23525	0.00130719	0.00437445	0.00202606	8894	tags=60%	list=16%	signal=51%	TNF/STAT3/CRLF2/TNFRSF12A/IRF1/IFNGR1/IL4R/CXCL3/IL7/LEPR/SOCS3/STAT1/PDGFC/BAK1/A2M/TNFRSF1B/CCR1/ACVRL1/CSF3R/TGFB1/IL1R2/IL6ST/CSF2RB/SOCS1/FAS/INHBE/CNTFR/DNTT/CCL7/REG1A/CD44/PIK3R5/ITGB3/ITGA4/CSF1/IL12RB1/IL15RA/IL2RG/TLR2/EBI3/IL6/IL2RA/PF4/CXCL1/OSMR/LTB/CXCL9/CD14/CXCL13/CXCL11/CXCL10/CD38
HALLMARK_INTERFERON_ALPHA_RESPONSE	HALLMARK_INTERFERON_ALPHA_RESPONSE	INTERFERON_ALPHA_RESPONSE	95	-0.690634	-2.17989	0.00131234	0.00437445	0.00202606	9741	tags=63%	list=17%	signal=52%	SLC25A28/TMEM140/LPAR6/SP110/HLA-C/CD47/PLSCR1/LGALS3BP/NMI/PARP9/PSME2/IRF1/PARP12/IL4R/IL7/TRIM21/MX1/PSMB8/GMPR/TRIM14/EPSTI1/RTP4/IRF7/IFIH1/IFI35/NCOA7/TAP1/LAP3/B2M/ISG15/UBE2L6/BST2/RSAD2/DDX60/IFI44L/IFIT2/HERC6/IFI44/LAMP3/OASL/IFI30/CD74/C1S/SAMD9/IFIT3/BATF2/PSMB9/SAMD9L/IFITM2/CSF1/WARS/LY6E/IL15/IFITM3/IFITM1/CASP1/IFI27/ISG20/CXCL11/CXCL10
HALLMARK_REACTIVE_OXYGEN_SPECIES_PATHWAY	HALLMARK_REACTIVE_OXYGEN_SPECIES_PATHWAY	REACTIVE_OXYGEN_SPECIES_PATHWAY	47	-0.658105	-1.89822	0.00144092	0.00443616	0.00205464	12423	tags=62%	list=22%	signal=48%	PRDX1/GCLC/STK25/FES/PFKP/JUNB/SBNO2/PDLIM1/GLRX/ATOX1/PRDX6/MBP/FTL/MSRA/TXNRD2/MPO/HHEX/IPCEF1/TXN/GPX3/NQO1/ABCC1/GCLM/PRNP/SRXN1/SOD2/TXNRD1/G6PD/LSP1
HALLMARK_ANGIOGENESIS	HALLMARK_ANGIOGENESIS	ANGIOGENESIS	36	-0.652747	-1.79756	0.0015083	0.00443616	0.00205464	7299	tags=58%	list=13%	signal=51%	STC1/FSTL1/LPL/VCAN/JAG2/COL5A2/COL3A1/POSTN/JAG1/CCND2/NRP1/PRG2/PDGFA/MSX1/THBD/FGFR1/TIMP1/PF4/SERPINA5/SPP1/CXCL6
HALLMARK_P53_PATHWAY	HALLMARK_P53_PATHWAY	P53_PATHWAY	197	-0.429315	-1.47091	0.00693642	0.0192678	0.00892404	13166	tags=37%	list=24%	signal=28%	LIF/BTG1/TSC22D1/JUN/NOTCH1/HRAS/RAP2B/IRAK1/FOS/MXD4/TAX1BP3/CD81/ADA/RHBDF2/RNF19B/DEF6/KLF4/PLK2/IER3/HSPA4L/RPL36/EPHX1/HINT1/SAT1/PTPRE/RB1/F2R/ITGB4/NINJ1/VDR/FGF13/GM2A/BAIAP2/PERP/TP63/INHBB/RPS12/NDRG1/PTPN14/TNFSF9/S100A10/AK1/BAK1/JAG2/TAP1/CCND2/SLC3A2/ZNF365/TGFB1/CD82/PDGFA/TCHH/SOCS1/TM4SF1/FAS/SFN/RRAD/IFI30/HBEGF/SERPINB5/ZBTB16/TPD52L1/STOM/KRT17/CLCA2/SPHK1/CASP1/CDH13/ALOX15B/…
HALLMARK_HYPOXIA	HALLMARK_HYPOXIA	HYPOXIA	190	-0.421706	-1.44118	0.00808314	0.0212637	0.00984844	13066	tags=44%	list=23%	signal=34%	BTG1/GBE1/JUN/TPI1/TIPARP/NDST1/RRAGD/PGK1/GRHPR/PFKP/HDLBP/GPI/HSPA5/PHKG1/FOS/CHST2/ANGPTL4/ENO1/MAP3K1/SDC3/SLC2A1/ALDOA/IER3/PFKFB3/GAPDH/HOXB9/GLRX/PNRC1/EDN2/PGM1/SLC2A3/AMPD3/TGM2/STC1/CA12/P4HA2/ADM/NDRG1/ACKR3/LDHA/TPBG/CHST3/SLC2A5/PGF/SERPINE1/BGN/DCN/KLF7/PAM/NFIL3/PLAUR/STC2/TGFB3/DTNA/TKTL1/COL5A1/GCK/ANXA2/CXCR4/DUSP1/EXT1/F3/GPC1/PYGM/LOX/TMEM45A/ADORA2B/EGFR/NR3C1/PPARGC1A/GCNT2/…
HALLMARK_COAGULATION	HALLMARK_COAGULATION	COAGULATION	138	-0.45118	-1.49647	0.00850547	0.0212637	0.00984844	10211	tags=54%	list=18%	signal=45%	S100A1/RAPGEF3/F8/F10/LEFTY2/MMP2/GSN/FYN/GNG12/LAMP2/DUSP14/APOC2/CTSK/COMP/MMP14/CFD/BMP1/CTSV/SPARC/VWF/LRP1/PROC/PLAU/MSRB2/ACOX2/ANXA1/A2M/CSRP1/GP1BA/HTRA1/CLU/CAPN2/SERPINE1/PRSS23/KLF7/THBS1/FBN1/MEP1A/PECAM1/PROS1/HNF4A/C2/MMP7/ITGA2/FN1/MMP8/C1R/THBD/F3/DPP4/CFB/CTSB/C1S/C3/CFH/F12/TIMP1/SERPING1/DCT/F2RL2/ITGB3/SERPINA1/P2RY1/RGN/CFI/SERPINB2/PF4/MMP10/MMP9/C1QA/PLEK/MMP1/MMP3/KLK8/TFP…
HALLMARK_BILE_ACID_METABOLISM	HALLMARK_BILE_ACID_METABOLISM	BILE_ACID_METABOLISM	112	0.382546	1.45175	0.00947867	0.0225683	0.0104527	6754	tags=27%	list=12%	signal=24%	TTR/AGXT/NR1H4/AKR1D1/GC/CYP8B1/DIO1/HAO1/AMACR/APOA1/ABCG8/ABCD3/SLC27A2/NR0B2/HSD3B1/SLC29A1/CYP7A1/HSD17B11/IDH1/PHYH/SLC23A2/ABCA3/ACSL5/PEX13/SLC23A1/ACSL1/CROT/PEX1/LIPE/ISOC1
HALLMARK_ESTROGEN_RESPONSE_LATE	HALLMARK_ESTROGEN_RESPONSE_LATE	ESTROGEN_RESPONSE_LATE	196	-0.41301	-1.41551	0.0115207	0.0261835	0.0121271	8913	tags=38%	list=16%	signal=32%	JAK1/ETFB/ASS1/NCOR2/FOS/ELOVL5/DNAJC12/ALDH3B1/TRIM29/IGFBP4/CPE/GJB3/KLF4/IMPA2/BLVRB/HSPA4L/NBL1/EGR3/SLC1A4/TMPRSS3/SOX3/ALDH3A2/ATP2B4/SLC24A3/SLC9A3R1/PGR/PERP/PCP4/PKP3/CYP26B1/RET/CA12/JAK2/CELSR2/HR/RBBP8/TPBG/ACOX2/CXCL14/KRT13/PRSS23/PDLIM3/PAPSS2/IL6ST/PTGER3/SFN/SLC7A5/TFF1/GPER1/RAB31/FKBP5/FABP5/TPD52L1/CYP4F11/S100A9/CD44/SERPINA1/CAV1/TPSAB1/CXCL12/SLC16A1/ISG20/CA2/SGK1/OLFM1/SE…
HALLMARK_E2F_TARGETS	HALLMARK_E2F_TARGETS	E2F_TARGETS	197	0.318368	1.30531	0.0145985	0.031736	0.0146988	18557	tags=46%	list=33%	signal=31%	PAN2/E2F8/STMN1/CCNE1/NUP107/SHMT1/PPM1D/TMPO/NBN/CCP110/TCF19/TOP2A/ORC6/MSH2/ESPL1/CDKN2C/WDR90/EZH2/SLBP/DONSON/PSMC3IP/CDKN1B/KIF18B/DCK/GINS4/LIG1/POLE/HELLS/SPAG5/MCM3/DSCC1/ILF3/TFRC/RAD1/RBBP7/RAD21/CDKN2A/TIMELESS/RAD51C/PLK4/ASF1B/CDK4/LUC7L3/BUB1B/CHEK2/CDK1/KIF4A/TUBG1/MYBL2/GINS1/POP7/CHEK1/UBE2T/PCNA/HMGB3/HMGB2/BRCA2/UNG/RAD51AP1/RNASEH2A/RPA2/ATAD2/CDCA8/BRCA1/NASP/CDC25A/CDCA3/MC…
HALLMARK_MTORC1_SIGNALING	HALLMARK_MTORC1_SIGNALING	MTORC1_SIGNALING	197	-0.401439	-1.37541	0.016185	0.0337187	0.0156171	17502	tags=42%	list=31%	signal=29%	PSMB5/STIP1/CANX/LTA4H/P4HA1/HK2/UBE2D3/SLC1A5/PSMA4/PPIA/DHCR24/PSMG1/HSP90B1/YKT6/PSMD13/ABCF2/SQSTM1/CDKN1A/QDPR/HSPD1/GSR/TES/PITPNB/GTF2H1/MAP2K3/PSMA3/FKBP2/GOT1/NUPR1/GBE1/TPI1/CCT6A/PGK1/PRDX1/GCLC/GPI/HSPA5/ELOVL5/ACTR3/ARPC5L/ATP6V1D/ETF1/ENO1/PPA1/SLC2A1/ALDOA/GAPDH/SERPINH1/GLRX/PSPH/SLC1A4/PNP/SLC9A3R1/PGM1/SLC2A3/STC1/LDHA/TUBA4A/SRD5A1/BCAT1/POLR3G/PLOD2/NFIL3/FAM129A/NAMPT/CXCR4/S…
HALLMARK_PEROXISOME	HALLMARK_PEROXISOME	PEROXISOME	104	0.358449	1.35809	0.0220264	0.0440529	0.0204034	8745	tags=29%	list=16%	signal=24%	TTR/ALB/UGT2B17/CRABP1/DIO1/ACOX1/HSD11B2/ABCD3/SLC27A2/CEL/ESR2/PABPC1/HSD17B11/HAO2/IDH1/SMARCC1/SLC23A2/ACSL5/PEX13/CRABP2/ACSL1/ACAA1/ISOC1/TOP2A/MSH2/NR1I2/CRAT/SEMA3C/ALDH1A1/SERPINA6
HALLMARK_UV_RESPONSE_UP	HALLMARK_UV_RESPONSE_UP	UV_RESPONSE_UP	156	-0.392035	-1.3193	0.0413712	0.0795599	0.0368488	14384	tags=40%	list=26%	signal=30%	POLE3/DNAJA1/TARS/DNAJB1/UROD/BSG/SULT1A1/ABCB1/PSMC3/BTG1/DDX21/CNP/MRPL23/SHOX2/STK25/KCNH2/JUNB/FOS/AP2S1/FURIN/HSPA2/ALDOA/EPHX1/LYN/TACR3/MMP14/GLS/IGFBP2/IRF1/FMO1/CTSV/NPTX2/RET/FGF18/CLTB/C4BPB/TUBA4A/RASGRP1/CDO1/BAK1/ICAM1/RAB27A/PLCL1/PDLIM3/TAP1/GPX3/IL6ST/CXCL2/TCHH/PTPRD/AQP3/RRAD/MSX1/NTRK3/SOD2/HLA-F/HTR7/IL6/CA2/OLFM1/GAL/NKX2-5
HALLMARK_HEME_METABOLISM	HALLMARK_HEME_METABOLISM	HEME_METABOLISM	196	-0.374017	-1.28186	0.0437788	0.0810719	0.0375491	11607	tags=27%	list=21%	signal=21%	TSPAN5/RBM38/LRP10/MFHAS1/PC/NFE2L1/SLC2A1/TMCC2/SDCBP/BLVRB/BMP2K/MBOAT2/SMOX/ALDH1L1/HTATIP2/LAMP2/SLC22A4/ALAS2/ABCB6/ABCG2/LMO2/MYL4/P4HA2/ACP5/BLVRA/HBBP1/OPTN/SNCA/GYPA/ELL2/SLC6A9/NFE2/HBB/TNS1/AQP3/AGPAT4/CLIC2/GCLM/PDZK1IP1/CTSB/GYPE/C3/MPP1/NR3C1/ACKR1/ADD2/GYPC/HBD/TRIM58/CA2/SPTA1/TRIM10/SLC7A11
HALLMARK_HEDGEHOG_SIGNALING	HALLMARK_HEDGEHOG_SIGNALING	HEDGEHOG_SIGNALING	35	-0.525187	-1.42712	0.047041	0.0840017	0.0389061	8398	tags=43%	list=15%	signal=36%	NKX6-1/SHH/THY1/RTN1/UNC5C/L1CAM/GLI1/NRP1/PML/CNTFR/ACHE/CDK6/NRP2/SCG2/CELSR1
