# Supplementary material
Source: Research Square preprint supplement (doi:10.21203/rs.3.rs-8947218/v1)
Supplement: Supplementary file 9 [file 6ef2738fb0599974762f5cbe.xlsx]

## Sheet: GO_BP
	ID	Description	GeneRatio	BgRatio	pvalue	p.adjust	qvalue	geneID	Count
GO:0070268	GO:0070268	cornification	52/442	112/18670	1.15732e-54	4.024e-51	3.54749e-51	KRT6C/TGM1/SPRR2A/KLK13/KRT6B/SPRR2D/KRT1/DSC1/DSG1/KLK14/SPRR1B/KLK12/SPRR2E/PI3/PKP1/DSC2/DSP/TCHH/DSG3/CDSN/SPRR2G/KRT24/KRT16/SPRR2F/KRT9/KRT78/CYP26B1/DSC3/KRT34/KRT38/KLK5/LCE3D/KRT5/KRT31/KRT6A/KRT14/KRT32/KRT71/FLG/KRT79/KRT75/KRT84/SPINK6/SPRR2B/KRT12/CASP14/KRT74/KRT4/KRT85/LOR/RPTN/LCE1A	52
GO:0031424	GO:0031424	keratinization	63/442	224/18670	5.7195e-50	9.94336e-47	8.76589e-47	KRT6C/TGM1/SPRR2A/KLK13/KRT6B/SPRR2D/KRT1/DSC1/DSG1/KLK14/SPRR1B/KLK12/SPRR2E/PI3/PKP1/DSC2/DSP/TCHH/DSG3/CDSN/SPRR2G/ABCA12/KRT24/KRT16/SPRR2F/KRT9/KRT78/CYP26B1/DSC3/KRT34/KRT38/KLK5/CNFN/LCE3D/KRT5/KRT31/TGM3/KRT6A/KRT14/KRT32/KRT71/SPRR4/FLG/KRT79/KRT75/LCE3E/KRT84/SPINK6/SPRR2B/KRT12/CASP14/KRTAP3-1/KRT74/KRT4/KRT85/KRTAP5-11/LOR/RPTN/KRTAP19-1/KRTAP2-3/LCE1C/LCE1A/LCE3A	63
GO:0030216	GO:0030216	keratinocyte differentiation	69/442	305/18670	8.86337e-48	1.02726e-44	9.05619e-45	KRT6C/TGM1/SPRR2A/KLK13/KRT6B/SPRR2D/KRT1/DSC1/DSG1/KLK14/SPRR1B/KLK12/SPRR2E/PI3/PKP1/S100A7/DSC2/DSP/TCHH/DSG3/CDSN/SPRR2G/ABCA12/CD109/KRT24/KRT16/SPRR2F/KRT9/KRT78/CYP26B1/DSC3/KRT34/KRT38/CTSV/SCEL/KLK5/CNFN/LCE3D/KRT5/KRT31/TGM3/KRT6A/KRT14/KRT32/KRT71/SPRR4/WNT16/FLG/KRT79/KRT75/LCE3E/KRT84/SPINK6/SPRR2B/KRT12/CASP14/KRTAP3-1/KRT74/SERPINB13/KRT4/KRT85/KRTAP5-11/LOR/RPTN/KRTAP19-1/KRTAP2-3…	69
GO:0008544	GO:0008544	epidermis development	81/442	464/18670	5.51936e-47	4.79771e-44	4.22958e-44	KRT6C/TGM1/KRTDAP/SPRR2A/KLK13/KRT6B/SPRR2D/KRT1/DSC1/DSG1/KLK14/SPRR1B/KLK7/EGFR/KLK12/SPRR2E/PI3/PKP1/S100A7/DSC2/DSP/TCHH/DSG3/CDSN/SPRR2G/ABCA12/CD109/KRT24/KRT16/PTHLH/SPRR2F/KRT9/KRT78/CYP26B1/DSC3/KRT34/KRT38/CTSV/SCEL/KLK5/LAMC2/CNFN/LCE3D/KRT5/KRT31/TGM3/KRT6A/KRT14/SULT2B1/KRT32/KRT71/SPRR4/SOSTDC1/WNT16/FLG/KRT79/KRT75/LCE3E/KRT84/COL17A1/SPINK6/BNC1/FLG2/CALML5/SPRR2B/KRT12/CASP14/KRT…	81
GO:0009913	GO:0009913	epidermal cell differentiation	70/442	358/18670	6.19733e-44	4.30962e-41	3.79929e-41	KRT6C/TGM1/SPRR2A/KLK13/KRT6B/SPRR2D/KRT1/DSC1/DSG1/KLK14/SPRR1B/KLK12/SPRR2E/PI3/PKP1/S100A7/DSC2/DSP/TCHH/DSG3/CDSN/SPRR2G/ABCA12/CD109/KRT24/KRT16/SPRR2F/KRT9/KRT78/CYP26B1/DSC3/KRT34/KRT38/CTSV/SCEL/KLK5/CNFN/LCE3D/KRT5/KRT31/TGM3/KRT6A/KRT14/SULT2B1/KRT32/KRT71/SPRR4/WNT16/FLG/KRT79/KRT75/LCE3E/KRT84/SPINK6/SPRR2B/KRT12/CASP14/KRTAP3-1/KRT74/SERPINB13/KRT4/KRT85/KRTAP5-11/LOR/RPTN/KRTAP19-1/…	70
GO:0043588	GO:0043588	skin development	74/442	419/18670	3.23421e-43	1.87423e-40	1.65229e-40	KRT6C/TGM1/SPRR2A/KLK13/KRT6B/SPRR2D/KRT1/DSC1/DSG1/KLK14/SPRR1B/EGFR/KLK12/SPRR2E/PI3/PKP1/S100A7/DSC2/DSP/TCHH/DSG3/CDSN/SPRR2G/ABCA12/CD109/KRT24/KRT16/SPRR2F/KRT9/KRT78/CYP26B1/DSC3/KRT34/KRT38/CTSV/SCEL/KLK5/CNFN/LCE3D/KRT5/KRT31/TGM3/KRT6A/KRT14/KRT32/KRT71/SPRR4/SOSTDC1/WNT16/FLG/KRT79/KRT75/LCE3E/KRT84/SPINK6/FLG2/SPRR2B/KRT12/CASP14/KRTAP3-1/KRT74/GAL/SERPINB13/KRT4/KRT85/KRTAP5-11/LOR/R…	74
GO:0018149	GO:0018149	peptide cross-linking	19/442	60/18670	7.37402e-17	3.66278e-14	3.22904e-14	TGM1/SPRR2A/SPRR2D/KRT1/SPRR1B/SPRR2E/PI3/DSP/SPRR2F/LCE3D/TGM3/SPRR4/FLG/LCE3E/SPRR2B/LOR/LCE1C/LCE1A/LCE3A	19
GO:0010951	GO:0010951	negative regulation of endopeptidase activity	30/442	250/18670	2.86087e-13	1.2434e-10	1.09616e-10	PI3/WFDC12/CD109/ITIH1/SERPINB2/SERPINB12/PZP/FABP1/KNG1/NLRP7/SERPINC1/SERPINA7/WFDC5/SERPINB7/TFPI2/A2ML1/SPINK6/HRG/CARD17/SERPINB13/AHSG/SERPINB10/CARD18/SERPINB3/TFAP2B/SERPINB4/AVP/SERPINB11/CST8/SPP2	30
GO:0010466	GO:0010466	negative regulation of peptidase activity	30/442	262/18670	9.80694e-13	3.78875e-10	3.3401e-10	PI3/WFDC12/CD109/ITIH1/SERPINB2/SERPINB12/PZP/FABP1/KNG1/NLRP7/SERPINC1/SERPINA7/WFDC5/SERPINB7/TFPI2/A2ML1/SPINK6/HRG/CARD17/SERPINB13/AHSG/SERPINB10/CARD18/SERPINB3/TFAP2B/SERPINB4/AVP/SERPINB11/CST8/SPP2	30
GO:0019730	GO:0019730	antimicrobial humoral response	20/442	122/18670	9.14211e-12	3.17871e-09	2.8023e-09	KLK7/LEAP2/PI3/S100A7/KLK3/PGLYRP3/PGLYRP4/IL36RN/S100A8/PGLYRP2/KLK5/KRT6A/S100A12/ITLN1/PPBP/F2/HRG/DEFB4A/FGA/BPIFB2	20
GO:0051346	GO:0051346	negative regulation of hydrolase activity	37/442	466/18670	1.34724e-10	4.25849e-08	3.75421e-08	PI3/MAP2/WFDC12/CD109/ITIH1/SERPINB2/SERPINB12/PZP/APOA1/FABP1/KNG1/NLRP7/SERPINC1/SERPINA7/APOA2/WFDC5/SERPINB7/PPP4R4/TFPI2/A2ML1/SPINK6/HRG/ELFN2/CARD17/SERPINB13/APOC3/AHSG/SERPINB10/CARD18/SERPINB3/TFAP2B/SERPINB4/AVP/SERPINB11/CST8/APCS/SPP2	37
GO:0045861	GO:0045861	negative regulation of proteolysis	31/442	363/18670	7.72185e-10	2.23741e-07	1.97246e-07	PI3/WFDC12/CD109/ITIH1/SERPINB2/SERPINB12/PZP/FABP1/KNG1/NLRP7/SERPINC1/SERPINA7/WFDC5/SERPINB7/TFPI2/A2ML1/SPINK6/F2/HRG/CARD17/SERPINB13/AHSG/SERPINB10/CARD18/SERPINB3/TFAP2B/SERPINB4/AVP/SERPINB11/CST8/SPP2	31
GO:0006721	GO:0006721	terpenoid metabolic process	17/442	120/18670	3.44503e-09	9.21413e-07	8.12302e-07	TTR/EGFR/CYP2C9/ABCA4/CYP1A2/ADH6/AKR1B10/CYP26B1/APOA1/ADH7/RPE65/APOA2/AKR1C1/CYP1A1/HMGCS2/SDR16C5/APOC3	17
GO:0006720	GO:0006720	isoprenoid metabolic process	18/442	139/18670	5.17279e-09	1.2847e-06	1.13257e-06	TTR/EGFR/CYP2C9/ABCA4/CYP1A2/ADH6/AKR1B10/CYP26B1/APOA1/ADH7/RPE65/APOA2/AKR1C1/CYP1A1/HMGCS2/SDR16C5/TH/APOC3	18
GO:0006805	GO:0006805	xenobiotic metabolic process	17/442	125/18670	6.5033e-09	1.50747e-06	1.32896e-06	CES1/CYP2C9/BAAT/UGT2B15/CYP1A2/CYP26B1/SULT1A2/ALDH3A1/S100A12/AKR1C1/CYP1A1/PON3/GSTA2/ACSM2B/UGT2B28/CYP2F1/CYP2B6	17
GO:0052548	GO:0052548	regulation of endopeptidase activity	32/442	425/18670	9.05657e-09	1.85995e-06	1.6397e-06	PI3/WFDC12/CD109/ITIH1/SERPINB2/SERPINB12/S100A8/PZP/FABP1/KNG1/NLRP7/SERPINC1/SERPINA7/WFDC5/SERPINB7/TFPI2/A2ML1/SPINK6/HRG/CARD17/SERPINB13/AHSG/SERPINB10/CARD18/SERPINB3/TFAP2B/KHDC1L/SERPINB4/AVP/SERPINB11/CST8/SPP2	32
GO:0019373	GO:0019373	epoxygenase P450 pathway	8/442	20/18670	9.09379e-09	1.85995e-06	1.6397e-06	CYP4F2/CYP2C9/CYP1A2/CYP4A11/CYP4F12/CYP1A1/CYP2F1/CYP2B6	8
GO:0071466	GO:0071466	cellular response to xenobiotic stimulus	20/442	180/18670	1.07315e-08	2.07297e-06	1.82749e-06	CES1/EGFR/CYP2C9/BAAT/UGT2B15/CYP1A2/CYP26B1/GJB2/SULT1A2/ALDH3A1/S100A12/AKR1C1/CYP1A1/PON3/PPARGC1A/GSTA2/ACSM2B/UGT2B28/CYP2F1/CYP2B6	20
GO:0042445	GO:0042445	hormone metabolic process	22/442	232/18670	3.67531e-08	6.72583e-06	5.92937e-06	CES1/TTR/KLK6/CYP2C9/CYP1A2/ADH6/AKR1B10/CYP26B1/SPP1/APOA1/GHRHR/CGA/ADH7/RPE65/AKR1C1/CYP1A1/SULT1E1/PON3/PPARGC1A/GAL/SDR16C5/CHAT	22
GO:0052547	GO:0052547	regulation of peptidase activity	32/442	452/18670	3.88446e-08	6.75314e-06	5.95345e-06	PI3/WFDC12/CD109/ITIH1/SERPINB2/SERPINB12/S100A8/PZP/FABP1/KNG1/NLRP7/SERPINC1/SERPINA7/WFDC5/SERPINB7/TFPI2/A2ML1/SPINK6/HRG/CARD17/SERPINB13/AHSG/SERPINB10/CARD18/SERPINB3/TFAP2B/KHDC1L/SERPINB4/AVP/SERPINB11/CST8/SPP2	32
GO:0016101	GO:0016101	diterpenoid metabolic process	15/442	110/18670	4.89164e-08	8.09915e-06	7.14007e-06	TTR/EGFR/ABCA4/CYP1A2/ADH6/AKR1B10/CYP26B1/APOA1/ADH7/RPE65/APOA2/AKR1C1/CYP1A1/SDR16C5/APOC3	15
GO:0006959	GO:0006959	humoral immune response	27/442	356/18670	1.16129e-07	1.83536e-05	1.61802e-05	KRT1/KLK7/LEAP2/PI3/S100A7/KLK3/PGLYRP3/PGLYRP4/IL36RN/S100A8/PGLYRP2/KLK5/KRT6A/S100A12/ITLN1/PPBP/F2/HRG/C8B/DEFB4A/C8A/CFHR5/CPN1/APCS/FGA/ZP4/BPIFB2	27
GO:0061844	GO:0061844	antimicrobial humoral immune response mediated by antimicrobial peptide	12/442	73/18670	1.32978e-07	1.96291e-05	1.73047e-05	KLK7/S100A7/KLK3/PGLYRP3/PGLYRP4/KLK5/KRT6A/S100A12/PPBP/F2/HRG/DEFB4A	12
GO:0009410	GO:0009410	response to xenobiotic stimulus	24/442	292/18670	1.3549e-07	1.96291e-05	1.73047e-05	CES1/EGFR/CYP2C9/BAAT/UGT2B15/CYP1A2/CYP26B1/GJB2/SULT1A2/ALDH3A1/S100A12/AKR1C1/CYP1A1/TAC1/DRD5/PON3/PPARGC1A/GSTA2/ACSM2B/TH/UGT2B28/CYP2F1/CYP2B6/SCGB1A1	24
GO:0030104	GO:0030104	water homeostasis	12/442	74/18670	1.55358e-07	2.15998e-05	1.9042e-05	KRT1/CYP4F2/ABCA12/KRT16/CYP26B1/CYP4A11/GHRHR/CYP4F12/FLG/FLG2/TFAP2B/AVP	12
GO:0001523	GO:0001523	retinoid metabolic process	14/442	104/18670	1.61517e-07	2.15998e-05	1.9042e-05	TTR/ABCA4/CYP1A2/ADH6/AKR1B10/CYP26B1/APOA1/ADH7/RPE65/APOA2/AKR1C1/CYP1A1/SDR16C5/APOC3	14
GO:0015711	GO:0015711	organic anion transport	32/442	482/18670	1.69649e-07	2.1847e-05	1.92599e-05	SLC7A11/HRH3/CYP4F2/ABCA4/ABCA12/SLC6A17/G6PC/CYP4A11/SLC36A2/APOA1/FABP1/SLC13A5/SLC17A4/SLC10A6/SLC38A4/CA4/APOA2/AKR1C1/NTSR1/SLC6A15/SLC6A14/AGXT/APOC3/NR1H4/SLC22A7/SLC2A2/SLCO1B7/SLC22A10/SLC7A13/AVP/SLC17A1/SLCO1B3	32
GO:1903035	GO:1903035	negative regulation of response to wounding	13/442	90/18670	1.93194e-07	2.34642e-05	2.06856e-05	KRT1/KLK8/CD109/SERPINB2/SPP1/KNG1/TSPAN8/PLG/APOH/F2/HRG/APCS/FGA	13
GO:0007586	GO:0007586	digestion	16/442	139/18670	1.95704e-07	2.34642e-05	2.06856e-05	APOA1/FABP1/APOA2/AKR1C1/MUC4/TAC1/PPARGC1A/SLC5A1/SST/MUC2/SLC2A2/GUCA2A/CHIA/TFF2/GKN1/STATH	16
GO:0045104	GO:0045104	intermediate filament cytoskeleton organization	10/442	50/18670	2.2001e-07	2.54992e-05	2.24797e-05	KRT6C/PKP1/DSP/TCHH/KRT16/KRT9/KRT14/KRT71/NEFL/KRT74	10
GO:0045103	GO:0045103	intermediate filament-based process	10/442	51/18670	2.67944e-07	3.0053e-05	2.64942e-05	KRT6C/PKP1/DSP/TCHH/KRT16/KRT9/KRT14/KRT71/NEFL/KRT74	10
GO:0008202	GO:0008202	steroid metabolic process	25/442	331/18670	3.71802e-07	4.03986e-05	3.56147e-05	CES1/CYP2C9/BAAT/UGT2B15/CYP1A2/CYP26B1/SPP1/G6PC/APOA1/SULT1A2/SULT2B1/CGA/PCSK9/UGT2B17/GC/APOA2/AKR1C1/CYP1A1/SULT1E1/PPARGC1A/HMGCS2/GAL/NR1H4/UGT2B28/CYP2B6	25
GO:0006690	GO:0006690	icosanoid metabolic process	14/442	114/18670	5.12083e-07	5.383e-05	4.74556e-05	CYP4F2/CYP2C9/CYP4F8/CYP1A2/CYP4A11/CYP4F12/CYP1A1/PON3/GGTLC3/GGT2/GGT3P/CYP2F1/CYP2B6/AVP	14
GO:0050891	GO:0050891	multicellular organismal water homeostasis	11/442	68/18670	5.2638e-07	5.383e-05	4.74556e-05	KRT1/CYP4F2/ABCA12/KRT16/CYP26B1/CYP4A11/CYP4F12/FLG/FLG2/TFAP2B/AVP	11
GO:0045109	GO:0045109	intermediate filament organization	7/442	23/18670	7.01899e-07	6.97287e-05	6.14716e-05	PKP1/DSP/TCHH/KRT9/KRT14/KRT71/NEFL	7
GO:0032689	GO:0032689	negative regulation of interferon-gamma production	8/442	35/18670	1.24371e-06	0.000120121	0.000105897	PGLYRP3/PGLYRP4/IL36RN/IL20RB/LGALS9B/LGALS9C/NR1H4/SCGB1A1	8
GO:0061045	GO:0061045	negative regulation of wound healing	11/442	76/18670	1.65903e-06	0.000155904	0.000137442	KRT1/CD109/SERPINB2/KNG1/TSPAN8/PLG/APOH/F2/HRG/APCS/FGA	11
GO:0034754	GO:0034754	cellular hormone metabolic process	14/442	129/18670	2.31456e-06	0.000211782	0.000186703	TTR/CYP2C9/CYP1A2/ADH6/AKR1B10/CYP26B1/SPP1/ADH7/RPE65/AKR1C1/CYP1A1/SULT1E1/PPARGC1A/SDR16C5	14
GO:0042730	GO:0042730	fibrinolysis	7/442	28/18670	3.05979e-06	0.000272792	0.000240489	KRT1/SERPINB2/PLG/APOH/F2/HRG/FGA	7
GO:0019835	GO:0019835	cytolysis	8/442	40/18670	3.66343e-06	0.000318444	0.000280735	PGLYRP3/PGLYRP4/KRT6A/F2/HRG/C8B/C8A/CFHR5	8
GO:0030195	GO:0030195	negative regulation of blood coagulation	9/442	53/18670	3.78944e-06	0.000321363	0.000283308	KRT1/SERPINB2/KNG1/TSPAN8/PLG/APOH/F2/HRG/FGA	9
GO:1900047	GO:1900047	negative regulation of hemostasis	9/442	54/18670	4.45313e-06	0.000360488	0.0003178	KRT1/SERPINB2/KNG1/TSPAN8/PLG/APOH/F2/HRG/FGA	9
GO:0042572	GO:0042572	retinol metabolic process	8/442	41/18670	4.45814e-06	0.000360488	0.0003178	TTR/CYP1A2/ADH6/AKR1B10/ADH7/RPE65/CYP1A1/SDR16C5	8
GO:0034308	GO:0034308	primary alcohol metabolic process	11/442	85/18670	5.10571e-06	0.000403467	0.00035569	TTR/CYP1A2/ADH6/AKR1B10/SULT1A2/ADH7/RPE65/AKR1C1/CYP1A1/SULT1E1/SDR16C5	11
GO:0050819	GO:0050819	negative regulation of coagulation	9/442	57/18670	7.07511e-06	0.00054667	0.000481935	KRT1/SERPINB2/KNG1/TSPAN8/PLG/APOH/F2/HRG/FGA	9
GO:0098742	GO:0098742	cell-cell adhesion via plasma-membrane adhesion molecules	20/442	273/18670	8.64868e-06	0.000653727	0.000576315	DSC1/DSG1/DSC2/DSG3/CLDN6/LGALS7B/PCDHGC5/DSC3/APOA1/CDH2/CLDN10/FAT2/SELL/DAB1/TENM2/TENM3/CDH16/CDH22/CDH9/CLDN17	20
GO:1901568	GO:1901568	fatty acid derivative metabolic process	15/442	167/18670	1.06776e-05	0.000789917	0.000696377	CYP4F2/CYP2C9/CYP4F8/CYP1A2/CYP4A11/CYP4F12/CYP1A1/PON3/HMGCS2/GGTLC3/GGT2/GGT3P/CYP2F1/CYP2B6/AVP	15
GO:0061436	GO:0061436	establishment of skin barrier	6/442	23/18670	1.22024e-05	0.000883912	0.000779242	KRT1/ABCA12/KRT16/CYP26B1/FLG/FLG2	6
GO:0048871	GO:0048871	multicellular organismal homeostasis	28/442	485/18670	1.44888e-05	0.00102812	0.000906369	FOXC2/KRT1/IHH/EGFR/CYP4F2/ABCA4/ALB/ABCA12/KRT16/CYP26B1/SPP1/IL20RB/CYP4A11/UCP1/RPE65/CYP4F12/FLG/NTSR1/MUC4/COL2A1/FLG2/PPARGC1A/SFTPA2/PM20D1/MUC2/TFAP2B/TFF2/AVP	28
GO:0015849	GO:0015849	organic acid transport	22/442	333/18670	1.59353e-05	0.00108641	0.000957763	SLC7A11/HRH3/CYP4F2/SLC6A17/CYP4A11/SLC36A2/FABP1/SLC13A5/SLC17A4/SLC10A6/SLC38A4/AKR1C1/NTSR1/SLC6A15/SLC6A14/AGXT/NR1H4/SLCO1B7/SLC7A13/AVP/SLC17A1/SLCO1B3	22
GO:0046942	GO:0046942	carboxylic acid transport	22/442	333/18670	1.59353e-05	0.00108641	0.000957763	SLC7A11/HRH3/CYP4F2/SLC6A17/CYP4A11/SLC36A2/FABP1/SLC13A5/SLC17A4/SLC10A6/SLC38A4/AKR1C1/NTSR1/SLC6A15/SLC6A14/AGXT/NR1H4/SLCO1B7/SLC7A13/AVP/SLC17A1/SLCO1B3	22
GO:0030193	GO:0030193	regulation of blood coagulation	10/442	79/18670	1.67337e-05	0.00111891	0.000986408	KRT1/SERPINB2/KNG1/TSPAN8/SERPINC1/PLG/APOH/F2/HRG/FGA	10
GO:1900046	GO:1900046	regulation of hemostasis	10/442	80/18670	1.8726e-05	0.00122849	0.00108302	KRT1/SERPINB2/KNG1/TSPAN8/SERPINC1/PLG/APOH/F2/HRG/FGA	10
GO:0019369	GO:0019369	arachidonic acid metabolic process	8/442	51/18670	2.41544e-05	0.00153148	0.00135012	CYP4F2/CYP2C9/CYP1A2/CYP4A11/CYP4F12/CYP1A1/CYP2F1/CYP2B6	8
GO:1903034	GO:1903034	regulation of response to wounding	15/442	179/18670	2.44272e-05	0.00153148	0.00135012	FOXC2/KRT1/KLK8/CD109/SERPINB2/SPP1/KNG1/TSPAN8/SERPINC1/PLG/APOH/F2/HRG/APCS/FGA	15
GO:0022600	GO:0022600	digestive system process	11/442	100/18670	2.46657e-05	0.00153148	0.00135012	APOA1/FABP1/APOA2/AKR1C1/MUC4/TAC1/SLC5A1/MUC2/SLC2A2/TFF2/STATH	11
GO:0033561	GO:0033561	regulation of water loss via skin	6/442	26/18670	2.6203e-05	0.00159838	0.0014091	KRT1/ABCA12/KRT16/CYP26B1/FLG/FLG2	6
GO:0050818	GO:0050818	regulation of coagulation	10/442	84/18670	2.88675e-05	0.00173056	0.00152563	KRT1/SERPINB2/KNG1/TSPAN8/SERPINC1/PLG/APOH/F2/HRG/FGA	10
GO:0042742	GO:0042742	defense response to bacterium	21/442	330/18670	4.29004e-05	0.00252821	0.00222883	KLK7/LEAP2/S100A7/WFDC12/KLK3/PGLYRP3/PGLYRP4/S100A8/PGLYRP2/KLK5/NLRP10/KRT6A/GBP6/S100A12/PPBP/F2/NR1H4/DEFB4A/FGA/STATH/LCE3A	21
GO:0061041	GO:0061041	regulation of wound healing	13/442	148/18670	5.18548e-05	0.00300498	0.00264914	FOXC2/KRT1/CD109/SERPINB2/KNG1/TSPAN8/SERPINC1/PLG/APOH/F2/HRG/APCS/FGA	13
GO:0051918	GO:0051918	negative regulation of fibrinolysis	4/442	10/18670	5.8113e-05	0.00331244	0.00292019	PLG/APOH/F2/HRG	4
GO:0052695	GO:0052695	cellular glucuronidation	5/442	19/18670	6.42521e-05	0.0036033	0.0031766	UGT2B15/UGT2B4/UGT2B17/UGT2A3/UGT2B28	5
GO:0003073	GO:0003073	regulation of systemic arterial blood pressure	10/442	93/18670	6.99184e-05	0.00385883	0.00340188	CES1/CYP4F2/KLK3/CYP4A11/KLK2/CYP4F12/AVPR1B/NTSR1/DRD5/AVP	10
GO:0006691	GO:0006691	leukotriene metabolic process	6/442	31/18670	7.58051e-05	0.00411835	0.00363067	CYP4F2/CYP4A11/CYP4F12/GGTLC3/GGT2/GGT3P	6
GO:0032370	GO:0032370	positive regulation of lipid transport	8/442	61/18670	9.08662e-05	0.00486064	0.00428506	CYP4F2/ABCA12/SPP1/CYP4A11/APOA1/NTSR1/TAC1/GAL	8
GO:0031640	GO:0031640	killing of cells of other organism	8/442	62/18670	0.000102199	0.00530367	0.00467562	PGLYRP3/PGLYRP4/KRT6A/S100A12/F2/HRG/DEFB4A/LCE3A	8
GO:0044364	GO:0044364	disruption of cells of other organism	8/442	62/18670	0.000102199	0.00530367	0.00467562	PGLYRP3/PGLYRP4/KRT6A/S100A12/F2/HRG/DEFB4A/LCE3A	8
GO:0032496	GO:0032496	response to lipopolysaccharide	20/442	330/18670	0.000126472	0.00646681	0.00570102	S100A7/IL36G/CYP1A2/IL36RN/GJB2/S100A8/NLRP7/CYP1A1/TAC1/TNIP3/PPBP/PPARGC1A/CARD17/TH/NR1H4/IL36A/GGT2/GGT3P/IL1F10/SCGB1A1	20
GO:0031581	GO:0031581	hemidesmosome assembly	4/442	12/18670	0.000131911	0.00655221	0.00577632	LAMC2/KRT5/KRT14/COL17A1	4
GO:0033700	GO:0033700	phospholipid efflux	4/442	12/18670	0.000131911	0.00655221	0.00577632	ABCA12/APOA1/APOA2/APOC3	4
GO:0006066	GO:0006066	alcohol metabolic process	21/442	364/18670	0.0001712	0.008384	0.00739119	CES1/TTR/CYP1A2/NUDT11/ADH6/AKR1B10/APOA1/SULT1A2/SULT2B1/ADH7/PCSK9/RPE65/APOA2/AKR1C1/NTSR1/CYP1A1/SULT1E1/HMGCS2/SDR16C5/NR1H4/PLCZ1	21
GO:0019748	GO:0019748	secondary metabolic process	8/442	67/18670	0.000177853	0.00856798	0.00755338	SLC7A11/CYP1A2/SLC45A2/AKR1B10/AKR1C1/CYP1A1/PON3/TH	8
GO:0015850	GO:0015850	organic hydroxy compound transport	17/442	262/18670	0.000179886	0.00856798	0.00755338	CES1/HRH3/ABCA12/SPP1/APOA1/SLC10A6/AQP7/PCSK9/APOA2/AKR1C1/TAC1/GAL/APOC3/NR1H4/FGF20/SLCO1B7/SLCO1B3	17
GO:0050713	GO:0050713	negative regulation of interleukin-1 beta secretion	4/442	13/18670	0.000186983	0.00878569	0.00774531	APOA1/NLRP7/CARD17/CARD18	4
GO:0002237	GO:0002237	response to molecule of bacterial origin	20/442	343/18670	0.000211484	0.00949534	0.00837093	S100A7/IL36G/CYP1A2/IL36RN/GJB2/S100A8/NLRP7/CYP1A1/TAC1/TNIP3/PPBP/PPARGC1A/CARD17/TH/NR1H4/IL36A/GGT2/GGT3P/IL1F10/SCGB1A1	20
GO:0055078	GO:0055078	sodium ion homeostasis	7/442	52/18670	0.000211888	0.00949534	0.00837093	CYP4F2/CYP4A11/CYP4F12/TAC1/ATP12A/TFAP2B/AVP	7
GO:0006063	GO:0006063	uronic acid metabolic process	5/442	24/18670	0.00021301	0.00949534	0.00837093	UGT2B15/UGT2B4/UGT2B17/UGT2A3/UGT2B28	5
GO:0019585	GO:0019585	glucuronate metabolic process	5/442	24/18670	0.00021301	0.00949534	0.00837093	UGT2B15/UGT2B4/UGT2B17/UGT2A3/UGT2B28	5
GO:0032368	GO:0032368	regulation of lipid transport	11/442	127/18670	0.000219033	0.00964023	0.00849866	CYP4F2/ABCA12/SPP1/CYP4A11/APOA1/PCSK9/APOA2/NTSR1/TAC1/GAL/APOC3	11
GO:0002576	GO:0002576	platelet degranulation	11/442	128/18670	0.00023463	0.0101976	0.00899004	ALB/CD109/APOA1/KNG1/PLG/APOH/PPBP/HRG/AHSG/FGA/SPP2	11
GO:0050892	GO:0050892	intestinal absorption	6/442	38/18670	0.000247105	0.0106072	0.00935115	APOA1/FABP1/APOA2/AKR1C1/SLC5A1/SLC2A2	6
GO:0051917	GO:0051917	regulation of fibrinolysis	4/442	14/18670	0.000256896	0.01079	0.00951226	PLG/APOH/F2/HRG	4
GO:0016999	GO:0016999	antibiotic metabolic process	12/442	151/18670	0.000257569	0.01079	0.00951226	EGFR/CYP1A2/ADH6/AKR1B10/SULT1A2/FTCD/ADH7/AKR1C1/CYP1A1/SULT1E1/MMP3/HBE1	12
GO:0033559	GO:0033559	unsaturated fatty acid metabolic process	10/442	110/18670	0.000284197	0.0117637	0.0103707	CYP4F2/CYP2C9/CYP4F8/CYP1A2/CYP4A11/CYP4F12/CYP1A1/CYP2F1/CYP2B6/AVP	10
GO:0045685	GO:0045685	regulation of glial cell differentiation	8/442	73/18670	0.000323987	0.013253	0.0116836	ZNF365/NOG/DAB1/LIN28A/DLX1/F2/PTPRZ1/NKX2-2	8
GO:0007618	GO:0007618	mating	6/442	40/18670	0.000330126	0.0133471	0.0117666	KLK14/PI3/TAC1/DRD5/TH/AVP	6
GO:0034310	GO:0034310	primary alcohol catabolic process	4/442	15/18670	0.000343788	0.0137397	0.0121126	AKR1B10/SULT1A2/ADH7/SULT1E1	4
GO:1901616	GO:1901616	organic hydroxy compound catabolic process	8/442	74/18670	0.00035587	0.0140609	0.0123959	CYP4F2/AKR1B10/CYP4A11/SULT1A2/ADH7/CYP4F12/NTSR1/SULT1E1	8
GO:0015721	GO:0015721	bile acid and bile salt transport	5/442	27/18670	0.000381608	0.0147428	0.012997	SLC10A6/AKR1C1/NR1H4/SLCO1B7/SLCO1B3	5
GO:0072378	GO:0072378	blood coagulation	fibrin clot formation	5/442	27/18670	0.000381608	0.0147428	0.012997	KNG1/SERPINC1/APOH/F2/FGA	5
GO:0050711	GO:0050711	negative regulation of interleukin-1 secretion	4/442	16/18670	0.000449852	0.0171883	0.0151529	APOA1/NLRP7/CARD17/CARD18	4
GO:0045686	GO:0045686	negative regulation of glial cell differentiation	5/442	28/18670	0.000455611	0.0172191	0.0151801	NOG/DAB1/LIN28A/DLX1/F2	5
GO:0006869	GO:0006869	lipid transport	20/442	365/18670	0.000471779	0.0176384	0.0155497	CES1/CYP4F2/ABCA4/ABCA12/SPP1/CYP4A11/APOA1/FABP1/SLC10A6/PCSK9/APOA2/AKR1C1/NTSR1/TAC1/APOH/GAL/APOC3/NR1H4/SLCO1B7/SLCO1B3	20
GO:0006775	GO:0006775	fat-soluble vitamin metabolic process	6/442	43/18670	0.000493899	0.0178884	0.0157701	CYP4F2/CYP26B1/RPE65/GC/CYP4F12/CYP1A1	6
GO:0046461	GO:0046461	neutral lipid catabolic process	6/442	43/18670	0.000493899	0.0178884	0.0157701	APOA1/FABP1/APOA2/FABP7/APOC3/FABP12	6
GO:0046464	GO:0046464	acylglycerol catabolic process	6/442	43/18670	0.000493899	0.0178884	0.0157701	APOA1/FABP1/APOA2/FABP7/APOC3/FABP12	6
GO:0048730	GO:0048730	epidermis morphogenesis	5/442	29/18670	0.000539925	0.0193538	0.017062	KLK14/TGM3/KRT71/SOSTDC1/FLG2	5
GO:0042268	GO:0042268	regulation of cytolysis	4/442	17/18670	0.000577327	0.0204833	0.0180577	PGLYRP3/PGLYRP4/KRT6A/CFHR5	4
GO:0007156	GO:0007156	homophilic cell adhesion via plasma membrane adhesion molecules	12/442	168/18670	0.000677586	0.0237976	0.0209796	DSC1/DSG1/DSC2/DSG3/PCDHGC5/DSC3/CDH2/FAT2/TENM3/CDH16/CDH22/CDH9	12
GO:1905954	GO:1905954	positive regulation of lipid localization	8/442	82/18670	0.000714165	0.0245916	0.0216796	CYP4F2/ABCA12/SPP1/CYP4A11/APOA1/NTSR1/TAC1/GAL	8
GO:0051384	GO:0051384	response to glucocorticoid	11/442	146/18670	0.000722423	0.0245916	0.0216796	EGFR/GJB2/CTSV/GHRHR/ALDH3A1/NEFL/APOA2/AGXT/TH/CPN1/SCGB1A1	11
GO:0007597	GO:0007597	blood coagulation	intrinsic pathway	4/442	18/18670	0.000728484	0.0245916	0.0216796	KNG1/SERPINC1/APOH/F2	4
GO:0034375	GO:0034375	high-density lipoprotein particle remodeling	4/442	18/18670	0.000728484	0.0245916	0.0216796	ALB/APOA1/APOA2/APOC3	4
GO:0046503	GO:0046503	glycerolipid catabolic process	7/442	64/18670	0.00077142	0.0257906	0.0227366	PLA2G4E/APOA1/FABP1/APOA2/FABP7/APOC3/FABP12	7
GO:0006631	GO:0006631	fatty acid metabolic process	20/442	383/18670	0.000859117	0.028449	0.0250802	CES1/CYP4F2/CYP2C9/BAAT/CYP4F8/CYP1A2/CYP4A11/FABP1/ACSM6/ADH7/CYP4F12/CYP1A1/PON3/PPARGC1A/ACSM2B/TH/APOC3/CYP2F1/CYP2B6/AVP	20
GO:0006641	GO:0006641	triglyceride metabolic process	9/442	105/18670	0.000870589	0.028498	0.0251233	G6PC/APOA1/FABP1/PCSK9/APOA2/FABP7/APOH/APOC3/FABP12	9
GO:0016485	GO:0016485	protein processing	18/442	328/18670	0.000876987	0.028498	0.0251233	KLK13/CES1/IHH/KLK6/KLK3/KLK2/CGA/NLRP7/PCSK9/CTSE/APOH/F2/C8B/CARD18/C8A/CFHR5/CPN1/FGA	18
GO:0016339	GO:0016339	calcium-dependent cell-cell adhesion via plasma membrane cell adhesion molecules	6/442	48/18670	0.00090002	0.0289756	0.0255444	DSG1/CDH2/SELL/CDH16/CDH22/CDH9	6
GO:0016042	GO:0016042	lipid catabolic process	18/442	333/18670	0.00104166	0.033228	0.0292932	CES1/CYP4F2/PNLIPRP3/CYP1A2/PLA2G4E/AKR1B10/CYP26B1/SPP1/CYP4A11/APOA1/FABP1/CYP4F12/APOA2/FABP7/SULT1E1/APOC3/FABP12/PLCZ1	18
GO:0001894	GO:0001894	tissue homeostasis	14/442	227/18670	0.00107291	0.0339137	0.0298977	KRT1/IHH/EGFR/ABCA4/ALB/ABCA12/SPP1/IL20RB/RPE65/MUC4/COL2A1/SFTPA2/MUC2/TFF2	14
GO:0007620	GO:0007620	copulation	4/442	20/18670	0.00111101	0.0348017	0.0306806	KLK14/PI3/TAC1/AVP	4
GO:0045216	GO:0045216	cell-cell junction organization	11/442	156/18670	0.00124501	0.0382493	0.0337199	DSG1/PKP1/DSP/CLDN6/GJB2/CDH2/WNT11/CTNND2/NR1H4/CDH22/CDH9	11
GO:1905952	GO:1905952	regulation of lipid localization	11/442	157/18670	0.00131104	0.0382493	0.0337199	CYP4F2/ABCA12/SPP1/CYP4A11/APOA1/PCSK9/APOA2/NTSR1/TAC1/GAL/APOC3	11
GO:0019433	GO:0019433	triglyceride catabolic process	5/442	35/18670	0.00131369	0.0382493	0.0337199	APOA1/FABP1/FABP7/APOC3/FABP12	5
GO:0001779	GO:0001779	natural killer cell differentiation	4/442	21/18670	0.00134698	0.0382493	0.0337199	PGLYRP3/PGLYRP4/PGLYRP2/HNF1A	4
GO:0006067	GO:0006067	ethanol metabolic process	4/442	21/18670	0.00134698	0.0382493	0.0337199	ADH6/SULT1A2/ADH7/SULT1E1	4
GO:0008217	GO:0008217	regulation of blood pressure	12/442	182/18670	0.0013602	0.0382493	0.0337199	CES1/CYP4F2/KLK3/CYP4A11/KLK2/CYP4F12/AVPR1B/NTSR1/TAC1/DRD5/GLP1R/AVP	12
GO:0042303	GO:0042303	molting cycle	9/442	112/18670	0.00137743	0.0382493	0.0337199	EGFR/CD109/KRT16/TGM3/KRT14/KRT71/SOSTDC1/KRT84/GAL	9
GO:0042633	GO:0042633	hair cycle	9/442	112/18670	0.00137743	0.0382493	0.0337199	EGFR/CD109/KRT16/TGM3/KRT14/KRT71/SOSTDC1/KRT84/GAL	9
GO:0006751	GO:0006751	glutathione catabolic process	3/442	10/18670	0.00139708	0.0382493	0.0337199	GGTLC3/GGT2/GGT3P	3
GO:0034378	GO:0034378	chylomicron assembly	3/442	10/18670	0.00139708	0.0382493	0.0337199	APOA1/APOA2/APOC3	3
GO:0035376	GO:0035376	sterol import	3/442	10/18670	0.00139708	0.0382493	0.0337199	APOA1/APOA2/APOC3	3
GO:0042758	GO:0042758	long-chain fatty acid catabolic process	3/442	10/18670	0.00139708	0.0382493	0.0337199	CYP4F2/CYP4A11/CYP4F12	3
GO:0070508	GO:0070508	cholesterol import	3/442	10/18670	0.00139708	0.0382493	0.0337199	APOA1/APOA2/APOC3	3
GO:1900426	GO:1900426	positive regulation of defense response to bacterium	3/442	10/18670	0.00139708	0.0382493	0.0337199	KLK7/KLK5/NLRP10	3
GO:1901748	GO:1901748	leukotriene D4 metabolic process	3/442	10/18670	0.00139708	0.0382493	0.0337199	GGTLC3/GGT2/GGT3P	3
GO:1901750	GO:1901750	leukotriene D4 biosynthetic process	3/442	10/18670	0.00139708	0.0382493	0.0337199	GGTLC3/GGT2/GGT3P	3
GO:0010876	GO:0010876	lipid localization	20/442	400/18670	0.00145042	0.0393993	0.0347337	CES1/CYP4F2/ABCA4/ABCA12/SPP1/CYP4A11/APOA1/FABP1/SLC10A6/PCSK9/APOA2/AKR1C1/NTSR1/TAC1/APOH/GAL/APOC3/NR1H4/SLCO1B7/SLCO1B3	20
GO:0098656	GO:0098656	anion transmembrane transport	16/442	288/18670	0.00146855	0.0395825	0.0348952	SLC7A11/SLC36A2/SLC13A5/SLC38A4/BEST2/NTSR1/SLC6A15/GRM5/SLC6A14/GABRR3/GABRQ/GABRP/SLC7A13/GABRA5/SLC17A1/CLDN17	16
GO:0003091	GO:0003091	renal water homeostasis	5/442	36/18670	0.0014963	0.0400204	0.0352813	CYP4F2/CYP4A11/CYP4F12/TFAP2B/AVP	5
GO:0034330	GO:0034330	cell junction organization	16/442	290/18670	0.00157655	0.0418447	0.0368895	DSG1/PKP1/DSP/CLDN6/GJB2/LAMC2/KRT5/CDH2/KRT14/WNT11/CTNND2/COL17A1/HRG/NR1H4/CDH22/CDH9	16
GO:0031960	GO:0031960	response to corticosteroid	11/442	162/18670	0.00168585	0.0444067	0.0391482	EGFR/GJB2/CTSV/GHRHR/ALDH3A1/NEFL/APOA2/AGXT/TH/CPN1/SCGB1A1	11
GO:0006081	GO:0006081	cellular aldehyde metabolic process	7/442	74/18670	0.00182613	0.0473841	0.041773	ALDOB/RPE65/ALDH3A1/AKR1C1/SDR16C5/AGXT/PRODH2	7
GO:0050710	GO:0050710	negative regulation of cytokine secretion	7/442	74/18670	0.00182613	0.0473841	0.041773	IL36RN/APOA1/NLRP7/APOA2/CARD17/NR1H4/CARD18	7
GO:0042737	GO:0042737	drug catabolic process	10/442	140/18670	0.00185943	0.0475539	0.0419227	CYP2C9/CYP1A2/SULT1A2/ADH7/SULT1E1/HBE1/CYP2F1/CYP2B6/CHIA/CPN1	10
GO:0034329	GO:0034329	cell junction assembly	14/442	241/18670	0.00188713	0.0475539	0.0419227	DSG1/PKP1/GJB2/LAMC2/KRT5/CDH2/KRT14/WNT11/CTNND2/COL17A1/HRG/NR1H4/CDH22/CDH9	14
GO:0045919	GO:0045919	positive regulation of cytolysis	3/442	11/18670	0.00188739	0.0475539	0.0419227	PGLYRP3/PGLYRP4/CFHR5	3
GO:1901569	GO:1901569	fatty acid derivative catabolic process	3/442	11/18670	0.00188739	0.0475539	0.0419227	CYP4F2/CYP4A11/CYP4F12	3
GO:0031667	GO:0031667	response to nutrient levels	23/442	499/18670	0.00192157	0.048067	0.042375	EGFR/DSC2/ALB/CYP26B1/SPP1/G6PC/CTSV/APOA1/UCP1/PCSK9/WNT11/SERPINC1/ALDH3A1/CYP1A1/GAST/PPARGC1A/GHRH/SST/TH/NR1H4/ASCL1/P2RX3/OTC	23
GO:0030900	GO:0030900	forebrain development	19/442	381/18670	0.00194527	0.0483121	0.0425911	SLC7A11/EGFR/CDH2/NOG/GHRHR/NEFL/DAB1/FABP7/DLX1/CRTAC1/PPARGC1A/GHRH/LHX8/TH/EPHA5/EFNA2/ASCL1/CNTNAP2/POU3F3	19
GO:0032755	GO:0032755	positive regulation of interleukin-6 production	8/442	96/18670	0.00199548	0.0492077	0.0433806	IL36G/IL36RN/NLRP10/LGALS9B/LGALS9C/PAEP/IL36A/IL1F10	8

## Sheet: GO_CC
	ID	Description	GeneRatio	BgRatio	pvalue	p.adjust	qvalue	geneID	Count
GO:0001533	GO:0001533	cornified envelope	31/458	65/19717	1.32852e-33	4.83583e-31	4.18136e-31	TGM1/SPRR2A/SPRR2D/KRT1/DSC1/DSG1/SPRR1B/SPRR2E/PI3/PKP1/DSC2/DSP/TCHH/DSG3/CDSN/SPRR2G/SPRR2F/DSC3/SCEL/CNFN/LCE3D/SPRR4/FLG/LCE3E/FLG2/SPRR2B/LOR/RPTN/LCE1C/LCE1A/LCE3A	31
GO:0005882	GO:0005882	intermediate filament	31/458	214/19717	3.54688e-16	6.45533e-14	5.58168e-14	KRT6C/KRT6B/KRT1/PKP1/DSP/KRT24/KRT16/KRT9/KRT78/KRT34/KRT38/KRT5/KRT31/KRT6A/KRT14/KRT32/KRT71/NEFL/FLG/KRT79/KRT75/KRT84/KRT12/CASP14/KRTAP3-1/KRT74/KRT4/KRT85/KRTAP5-11/KRTAP19-1/KRTAP2-3	31
GO:0045111	GO:0045111	intermediate filament cytoskeleton	32/458	251/19717	4.91806e-15	5.96724e-13	5.15965e-13	KRT6C/KRT6B/KRT1/PKP1/DSP/KRT24/KRT16/KRT9/KRT78/KRT34/S100A8/KRT38/KRT5/KRT31/KRT6A/KRT14/KRT32/KRT71/NEFL/FLG/KRT79/KRT75/KRT84/KRT12/CASP14/KRTAP3-1/KRT74/KRT4/KRT85/KRTAP5-11/KRTAP19-1/KRTAP2-3	32
GO:0045095	GO:0045095	keratin filament	18/458	95/19717	5.96889e-12	5.43169e-10	4.69658e-10	KRT6C/KRT6B/KRT1/KRT78/KRT5/KRT6A/KRT14/KRT71/KRT79/KRT75/KRT84/CASP14/KRTAP3-1/KRT74/KRT4/KRT85/KRTAP5-11/KRTAP2-3	18
GO:0072562	GO:0072562	blood microparticle	17/458	147/19717	5.83523e-08	3.69836e-06	3.19783e-06	KRT1/ALB/ITIH1/PZP/APOA1/KNG1/GC/SERPINC1/APOA2/PLG/F2/HRG/HBE1/AHSG/C8A/APCS/FGA	17
GO:0030057	GO:0030057	desmosome	8/458	25/19717	6.09619e-08	3.69836e-06	3.19783e-06	DSC1/DSG1/PKP1/DSC2/DSP/DSG3/CDSN/DSC3	8
GO:0062023	GO:0062023	collagen-containing extracellular matrix	28/458	406/19717	3.3237e-07	1.72833e-05	1.49442e-05	KRT1/S100A7/ITIH1/SERPINB12/S100A8/PZP/APOA1/LAMC2/CDH2/KNG1/SERPINC1/FLG/PLG/COL2A1/LGALS4/COL17A1/MUC17/APOH/F2/HRG/PTPRZ1/APOC3/AHSG/MUC2/SOST/APCS/FGA/SPP2	28
GO:0005911	GO:0005911	cell-cell junction	29/458	459/19717	1.23636e-06	5.62545e-05	4.86412e-05	DSC1/DSG1/PKP1/DSC2/DSP/DSG3/CLDN6/CDSN/FLRT2/GJB2/DSC3/CDH2/CLDN10/FAT2/AQP7/PDZD3/NPHS2/FABP7/CTNND2/COL17A1/KIRREL2/CALB2/SLC5A1/SLC2A2/CDH22/CLDN24/CNTNAP2/CDH9/CLDN17	29
GO:0042599	GO:0042599	lamellar body	5/458	17/19717	3.25012e-05	0.00131449	0.00113659	KRTDAP/KLK7/ABCA12/KLK5/SFTPA2	5
GO:0042627	GO:0042627	chylomicron	4/458	13/19717	0.000173927	0.00633093	0.00547411	APOA1/APOA2/APOH/APOC3	4
GO:0005788	GO:0005788	endoplasmic reticulum lumen	18/458	309/19717	0.00035191	0.011645	0.010069	CES1/ALB/SPP1/APOA1/CDH2/KNG1/PCSK9/SERPINC1/APOA2/CASQ1/COL2A1/COL17A1/F2/ARSF/AHSG/FGA/SPP2/BPIFB2	18
GO:0043025	GO:0043025	neuronal cell body	24/458	497/19717	0.000638165	0.0193577	0.0167378	PVALB/MAP2/CTSV/PSD2/UCHL1/DAB1/FABP7/CTNND2/NTSR1/TAC1/GRIA1/PPARGC1A/GHRH/BRINP3/SST/GAL/TH/EPHA5/EFNA2/ASCL1/P2RX3/BRINP2/CNTNAP2/GABRA5	24
GO:0005791	GO:0005791	rough endoplasmic reticulum	8/458	85/19717	0.000803665	0.0198467	0.0171606	SLC7A11/CA4/PCSK9/LIN28A/SFTPA2/EPHA5/P2RX3/SCGB1A1	8
GO:1902711	GO:1902711	GABA-A receptor complex	4/458	19/19717	0.000844136	0.0198467	0.0171606	GABRR3/GABRQ/GABRP/GABRA5	4
GO:0031093	GO:0031093	platelet alpha granule lumen	7/458	67/19717	0.000911456	0.0198467	0.0171606	ALB/KNG1/PLG/PPBP/HRG/AHSG/FGA	7
GO:0034707	GO:0034707	chloride channel complex	6/458	50/19717	0.0010169	0.0198467	0.0171606	BEST2/GABRR3/GABRQ/GABRP/GABRA5/CLDN17	6
GO:0034361	GO:0034361	very-low-density lipoprotein particle	4/458	20/19717	0.00103595	0.0198467	0.0171606	APOA1/APOA2/APOH/APOC3	4
GO:0034385	GO:0034385	triglyceride-rich plasma lipoprotein particle	4/458	20/19717	0.00103595	0.0198467	0.0171606	APOA1/APOA2/APOH/APOC3	4
GO:1902710	GO:1902710	GABA receptor complex	4/458	20/19717	0.00103595	0.0198467	0.0171606	GABRR3/GABRQ/GABRP/GABRA5	4
GO:0031091	GO:0031091	platelet alpha granule	8/458	91/19717	0.00125811	0.0228975	0.0197986	ALB/CD109/KNG1/PLG/PPBP/HRG/AHSG/FGA	8
GO:1902495	GO:1902495	transmembrane transporter complex	17/458	324/19717	0.00160472	0.0278151	0.0240506	CHRNA9/LRRC38/BEST2/GRIA1/ATP12A/GABRR3/GABRQ/GABRP/HCN1/CNTNAP2/OLFM3/CACNG6/KCNA10/CHRND/GABRA5/CLDN17/HTR3B	17
GO:0034702	GO:0034702	ion channel complex	16/458	301/19717	0.00190896	0.0315846	0.02731	CHRNA9/LRRC38/BEST2/GRIA1/GABRR3/GABRQ/GABRP/HCN1/CNTNAP2/OLFM3/CACNG6/KCNA10/CHRND/GABRA5/CLDN17/HTR3B	16
GO:1990351	GO:1990351	transporter complex	17/458	332/19717	0.00207481	0.0327433	0.0283119	CHRNA9/LRRC38/BEST2/GRIA1/ATP12A/GABRR3/GABRQ/GABRP/HCN1/CNTNAP2/OLFM3/CACNG6/KCNA10/CHRND/GABRA5/CLDN17/HTR3B	17
GO:0005903	GO:0005903	brush border	8/458	99/19717	0.0021589	0.0327433	0.0283119	SLC7A11/CA4/PDZD3/DAB1/ITLN1/DRD5/SLC5A1/SLC2A2	8
GO:0031983	GO:0031983	vesicle lumen	17/458	339/19717	0.00257604	0.0359321	0.0310691	TTR/EGFR/S100A7/ALB/S100A8/APOA1/KNG1/S100A12/PLG/APOH/PPBP/HRG/OLFM4/AHSG/SERPINB3/FGA/SPP2	17
GO:0005796	GO:0005796	Golgi lumen	8/458	102/19717	0.00260427	0.0359321	0.0310691	MUC16/CGA/MUC4/MUC17/F2/MUC21/MUC2/DEFB4A	8
GO:0098862	GO:0098862	cluster of actin-based cell projections	10/458	150/19717	0.00269594	0.0359321	0.0310691	SLC7A11/PVALB/CA4/PDZD3/DAB1/ITLN1/DRD5/CALB2/SLC5A1/SLC2A2	10
GO:0034364	GO:0034364	high-density lipoprotein particle	4/458	26/19717	0.00286369	0.0359321	0.0310691	APOA1/APOA2/APOH/APOC3	4
GO:0101003	GO:0101003	ficolin-1-rich granule membrane	6/458	61/19717	0.00286907	0.0359321	0.0310691	DSC1/DSG1/PKP1/DSP/SERPINB12/SERPINB10	6
GO:0098889	GO:0098889	intrinsic component of presynaptic membrane	7/458	82/19717	0.00296144	0.0359321	0.0310691	GRM3/ADAM23/CDH2/CNTN1/P2RX3/CDH9/GABRA5	7
GO:0034774	GO:0034774	secretory granule lumen	16/458	321/19717	0.00360629	0.0423448	0.0366139	TTR/S100A7/ALB/S100A8/APOA1/KNG1/S100A12/PLG/APOH/PPBP/HRG/OLFM4/AHSG/SERPINB3/FGA/SPP2	16

## Sheet: GO_MF
	ID	Description	GeneRatio	BgRatio	pvalue	p.adjust	qvalue	geneID	Count
GO:0004866	GO:0004866	endopeptidase inhibitor activity	29/434	175/17697	3.18625e-16	1.80136e-13	1.44846e-13	PI3/WFDC12/CD109/ITIH1/SERPINB2/SERPINB12/PZP/KNG1/NLRP7/SERPINC1/SERPINA7/WFDC5/SERPINB7/TFPI2/A2ML1/SPINK6/HRG/CARD17/SERPINB13/AHSG/SERPINB10/CARD18/SERPINB3/TFAP2B/SERPINB4/AVP/SERPINB11/CST8/SPP2	29
GO:0030414	GO:0030414	peptidase inhibitor activity	29/434	182/17697	9.38209e-16	1.80136e-13	1.44846e-13	PI3/WFDC12/CD109/ITIH1/SERPINB2/SERPINB12/PZP/KNG1/NLRP7/SERPINC1/SERPINA7/WFDC5/SERPINB7/TFPI2/A2ML1/SPINK6/HRG/CARD17/SERPINB13/AHSG/SERPINB10/CARD18/SERPINB3/TFAP2B/SERPINB4/AVP/SERPINB11/CST8/SPP2	29
GO:0061135	GO:0061135	endopeptidase regulator activity	29/434	182/17697	9.38209e-16	1.80136e-13	1.44846e-13	PI3/WFDC12/CD109/ITIH1/SERPINB2/SERPINB12/PZP/KNG1/NLRP7/SERPINC1/SERPINA7/WFDC5/SERPINB7/TFPI2/A2ML1/SPINK6/HRG/CARD17/SERPINB13/AHSG/SERPINB10/CARD18/SERPINB3/TFAP2B/SERPINB4/AVP/SERPINB11/CST8/SPP2	29
GO:0004867	GO:0004867	serine-type endopeptidase inhibitor activity	20/434	94/17697	1.02139e-13	1.4708e-11	1.18266e-11	PI3/WFDC12/CD109/ITIH1/SERPINB2/SERPINB12/PZP/SERPINC1/SERPINA7/WFDC5/SERPINB7/TFPI2/A2ML1/SPINK6/HRG/SERPINB13/SERPINB10/SERPINB3/SERPINB4/SERPINB11	20
GO:0061134	GO:0061134	peptidase regulator activity	29/434	219/17697	1.32634e-13	1.52795e-11	1.22861e-11	PI3/WFDC12/CD109/ITIH1/SERPINB2/SERPINB12/PZP/KNG1/NLRP7/SERPINC1/SERPINA7/WFDC5/SERPINB7/TFPI2/A2ML1/SPINK6/HRG/CARD17/SERPINB13/AHSG/SERPINB10/CARD18/SERPINB3/TFAP2B/SERPINB4/AVP/SERPINB11/CST8/SPP2	29
GO:0004857	GO:0004857	enzyme inhibitor activity	35/434	375/17697	1.27384e-11	1.22288e-09	9.83312e-10	PI3/WFDC12/CD109/ITIH1/SERPINB2/SERPINB12/PZP/APOA1/KNG1/NLRP7/GCKR/SERPINC1/SERPINA7/APOA2/WFDC5/SERPINB7/TFPI2/A2ML1/SPINK6/HRG/ELFN2/CARD17/SERPINB13/APOC3/AHSG/SERPINB10/CARD18/SERPINB3/TFAP2B/SERPINB4/AVP/SERPINB11/CST8/SCGB1A1/SPP2	35
GO:0004252	GO:0004252	serine-type endopeptidase activity	21/434	160/17697	3.92055e-10	3.22605e-08	2.59405e-08	TMPRSS11D/KLK10/KLK13/KLK14/KLK8/KLK7/KLK12/KLK11/TMPRSS11F/KLK6/KLK3/TMPRSS11A/KLK5/TMPRSS11B/KLK2/KLK9/PCSK9/PLG/F2/MMP3/PRSS56	21
GO:0030280	GO:0030280	structural constituent of epidermis	8/434	16/17697	1.32948e-09	9.57225e-08	7.69699e-08	KRT1/SPRR2E/PI3/PKP1/FLG/KRT84/FLG2/LOR	8
GO:0008236	GO:0008236	serine-type peptidase activity	21/434	182/17697	4.24472e-09	2.71662e-07	2.18442e-07	TMPRSS11D/KLK10/KLK13/KLK14/KLK8/KLK7/KLK12/KLK11/TMPRSS11F/KLK6/KLK3/TMPRSS11A/KLK5/TMPRSS11B/KLK2/KLK9/PCSK9/PLG/F2/MMP3/PRSS56	21
GO:0017171	GO:0017171	serine hydrolase activity	21/434	186/17697	6.28931e-09	3.62264e-07	2.91294e-07	TMPRSS11D/KLK10/KLK13/KLK14/KLK8/KLK7/KLK12/KLK11/TMPRSS11F/KLK6/KLK3/TMPRSS11A/KLK5/TMPRSS11B/KLK2/KLK9/PCSK9/PLG/F2/MMP3/PRSS56	21
GO:0008391	GO:0008391	arachidonic acid monooxygenase activity	7/434	17/17697	7.99498e-08	4.18646e-06	3.36631e-06	CYP4F2/CYP2C9/CYP4A11/CYP4F12/CYP1A1/CYP2F1/CYP2B6	7
GO:0005200	GO:0005200	structural constituent of cytoskeleton	14/434	102/17697	1.92342e-07	9.23241e-06	7.42372e-06	KRT6B/DSP/TUBAL3/KRT16/KRT9/KRT5/KRT31/KRT6A/KRT14/NEFL/ADD2/KRT84/LOR/TUBA3E	14
GO:0004497	GO:0004497	monooxygenase activity	13/434	99/17697	8.84917e-07	3.92086e-05	3.15274e-05	CYP4F2/CYP2C9/CYP4F8/CYP1A2/CYP26B1/CYP4A11/CYP4F12/AKR1C1/CYP1A1/CYP4A22/TH/CYP2F1/CYP2B6	13
GO:0004869	GO:0004869	cysteine-type endopeptidase inhibitor activity	10/434	58/17697	1.29237e-06	5.24624e-05	4.21847e-05	KNG1/HRG/CARD17/SERPINB13/AHSG/CARD18/SERPINB3/TFAP2B/AVP/CST8	10
GO:0008392	GO:0008392	arachidonic acid epoxygenase activity	6/434	16/17697	1.36621e-06	5.24624e-05	4.21847e-05	CYP4F2/CYP2C9/CYP4A11/CYP4F12/CYP2F1/CYP2B6	6
GO:0020037	GO:0020037	heme binding	14/434	135/17697	5.91557e-06	0.000212961	0.00017124	CYP4F2/CYP2C9/CYP4F8/CYP1A2/CYP26B1/STEAP4/CYP4A11/CYP4F12/CYP1A1/CYP4A22/HRG/HBE1/CYP2F1/CYP2B6	14
GO:0016712	GO:0016712	oxidoreductase activity	acting on paired donors	with incorporation or reduction of molecular oxygen	reduced flavin or flavoprotein as one donor	and incorporation of one atom of oxygen	7/434	32/17697	1.00624e-05	0.000340938	0.000274146	CYP2C9/CYP4F8/CYP1A2/CYP4F12/CYP1A1/CYP2F1/CYP2B6	7
GO:0046906	GO:0046906	tetrapyrrole binding	14/434	145/17697	1.35379e-05	0.000433212	0.000348343	CYP4F2/CYP2C9/CYP4F8/CYP1A2/CYP26B1/STEAP4/CYP4A11/CYP4F12/CYP1A1/CYP4A22/HRG/HBE1/CYP2F1/CYP2B6	14
GO:0004175	GO:0004175	endopeptidase activity	26/434	427/17697	2.12166e-05	0.000643199	0.000517193	TMPRSS11D/KLK10/KLK13/KLK14/KLK8/KLK7/KLK12/KLK11/TMPRSS11F/KLK6/KLK3/TMPRSS11A/CTSV/ADAM23/KLK5/TMPRSS11B/KLK2/KLK9/PCSK9/UCHL1/CTSE/PLG/F2/MMP3/CASP14/PRSS56	26
GO:0015291	GO:0015291	secondary active transmembrane transporter activity	18/434	237/17697	2.36461e-05	0.000681009	0.000547595	SLC7A11/SLC47A2/SLC6A17/SLC45A2/SLC36A2/SLC47A1/SLC13A5/SLC17A4/SLC10A6/SLC38A4/SLC6A15/SLC28A2/SLC6A14/SLC5A1/SLC22A7/SLCO1B7/SLC17A1/SLCO1B3	18
GO:0016709	GO:0016709	oxidoreductase activity	acting on paired donors	with incorporation or reduction of molecular oxygen	NAD(P)H as one donor	and incorporation of one atom of oxygen	7/434	39/17697	3.9652e-05	0.0010876	0.00087453	CYP4F2/CYP26B1/CYP4A11/CYP4F12/AKR1C1/CYP1A1/CYP4A22	7
GO:0005230	GO:0005230	extracellular ligand-gated ion channel activity	9/434	75/17697	8.85471e-05	0.00231832	0.00186415	CHRNA9/GRIA1/GABRR3/GABRQ/GABRP/P2RX3/CHRND/GABRA5/HTR3B	9
GO:0015020	GO:0015020	glucuronosyltransferase activity	6/434	33/17697	0.000132679	0.00332275	0.00267181	UGT2B15/UGT2B4/UGT2B17/B3GAT1/UGT2A3/UGT2B28	6
GO:0015276	GO:0015276	ligand-gated ion channel activity	12/434	138/17697	0.000152578	0.0033828	0.00272009	CHRNA9/GRIA1/GABRR3/GABRQ/GABRP/P2RX3/HCN1/KCNA10/CHRND/GABRA5/KCNJ18/HTR3B	12
GO:0022834	GO:0022834	ligand-gated channel activity	12/434	138/17697	0.000152578	0.0033828	0.00272009	CHRNA9/GRIA1/GABRR3/GABRQ/GABRP/P2RX3/HCN1/KCNA10/CHRND/GABRA5/KCNJ18/HTR3B	12
GO:0016705	GO:0016705	oxidoreductase activity	acting on paired donors	with incorporation or reduction of molecular oxygen	13/434	159/17697	0.000152696	0.0033828	0.00272009	CYP4F2/CYP2C9/CYP4F8/CYP1A2/CYP26B1/CYP4A11/CYP4F12/AKR1C1/CYP1A1/CYP4A22/TH/CYP2F1/CYP2B6	13
GO:0008509	GO:0008509	anion transmembrane transporter activity	20/434	327/17697	0.000177299	0.00378239	0.00304139	SLC7A11/SLC36A2/SLC13A5/SLC17A4/SLC10A6/SLC38A4/BEST2/SLC6A15/SLC6A14/GABRR3/GABRQ/GABRP/SLC22A7/SLC2A2/SLCO1B7/SLC7A13/GABRA5/SLC17A1/SLCO1B3/CLDN17	20
GO:0015294	GO:0015294	solute:cation symporter activity	10/434	102/17697	0.000202262	0.00416081	0.00334568	SLC6A17/SLC45A2/SLC36A2/SLC13A5/SLC17A4/SLC10A6/SLC6A15/SLC28A2/SLC6A14/SLC5A1	10
GO:0015293	GO:0015293	symporter activity	12/434	144/17697	0.000227644	0.0044493	0.00357765	SLC6A17/SLC45A2/SLC36A2/SLC13A5/SLC17A4/SLC10A6/SLC38A4/SLC6A15/SLC28A2/SLC6A14/SLC5A1/SLC17A1	12
GO:0005326	GO:0005326	neurotransmitter transporter activity	7/434	51/17697	0.000231734	0.0044493	0.00357765	SLC7A11/SLC6A17/SLC36A2/SLC6A15/SLC6A14/SLC18A3/GABRQ	7
GO:0022804	GO:0022804	active transmembrane transporter activity	21/434	362/17697	0.000253764	0.0047151	0.00379138	SLC7A11/SLC47A2/ABCA4/ABCA12/SLC6A17/SLC45A2/SLC36A2/SLC47A1/SLC13A5/SLC17A4/SLC10A6/SLC38A4/SLC6A15/ATP12A/SLC28A2/SLC6A14/SLC5A1/SLC22A7/SLCO1B7/SLC17A1/SLCO1B3	21
GO:0015370	GO:0015370	solute:sodium symporter activity	8/434	72/17697	0.000371978	0.00636769	0.00512022	SLC6A17/SLC13A5/SLC17A4/SLC10A6/SLC6A15/SLC28A2/SLC6A14/SLC5A1	8
GO:0005506	GO:0005506	iron ion binding	12/434	152/17697	0.000374891	0.00636769	0.00512022	CYP4F2/CYP2C9/CYP4F8/CYP1A2/CYP26B1/CYP4A11/CYP4F12/CYP1A1/CYP4A22/TH/CYP2F1/CYP2B6	12
GO:0008242	GO:0008242	omega peptidase activity	4/434	15/17697	0.000392823	0.00636769	0.00512022	UCHL1/GGTLC3/GGT2/GGT3P	4
GO:0005342	GO:0005342	organic acid transmembrane transporter activity	12/434	153/17697	0.000397981	0.00636769	0.00512022	SLC7A11/SLC36A2/SLC13A5/SLC17A4/SLC10A6/SLC38A4/SLC6A15/SLC6A14/SLCO1B7/SLC7A13/SLC17A1/SLCO1B3	12
GO:0046943	GO:0046943	carboxylic acid transmembrane transporter activity	12/434	153/17697	0.000397981	0.00636769	0.00512022	SLC7A11/SLC36A2/SLC13A5/SLC17A4/SLC10A6/SLC38A4/SLC6A15/SLC6A14/SLCO1B7/SLC7A13/SLC17A1/SLCO1B3	12
GO:0005149	GO:0005149	interleukin-1 receptor binding	4/434	16/17697	0.00051367	0.00799659	0.00643001	IL36G/IL36RN/IL36A/IL1F10	4
GO:0055102	GO:0055102	lipase inhibitor activity	4/434	17/17697	0.000658788	0.00998583	0.00802954	APOA1/APOA2/APOC3/SCGB1A1	4
GO:0008514	GO:0008514	organic anion transmembrane transporter activity	14/434	211/17697	0.000737678	0.0108949	0.00876055	SLC7A11/SLC36A2/SLC13A5/SLC17A4/SLC10A6/SLC38A4/SLC6A15/SLC6A14/SLC22A7/SLC2A2/SLCO1B7/SLC7A13/SLC17A1/SLCO1B3	14
GO:0016755	GO:0016755	transferase activity	transferring amino-acyl groups	4/434	18/17697	0.000830716	0.0119239	0.00958794	TGM1/TGM3/GGT2/GGT3P	4
GO:0005179	GO:0005179	hormone activity	10/434	122/17697	0.000848751	0.0119239	0.00958794	TTR/PTHLH/CGA/GAST/INSL4/GHRH/SST/GAL/GUCA2A/AVP	10
GO:0033293	GO:0033293	monocarboxylic acid binding	7/434	64/17697	0.000946442	0.0129798	0.010437	ALB/CYP26B1/S100A8/FABP1/UCP1/AKR1C1/NR1H4	7
GO:0004890	GO:0004890	GABA-A receptor activity	4/434	19/17697	0.00103201	0.0138242	0.0111159	GABRR3/GABRQ/GABRP/GABRA5	4
GO:0002020	GO:0002020	protease binding	10/434	128/17697	0.00122727	0.0160661	0.0129186	PZP/SELL/PDZD3/NLRP7/SERPINC1/CARD17/SERPINB13/CARD18/SERPINB3/SERPINB4	10
GO:0004745	GO:0004745	retinol dehydrogenase activity	4/434	20/17697	0.00126524	0.016195	0.0130223	SDR9C7/ADH6/ADH7/SDR16C5	4
GO:0005539	GO:0005539	glycosaminoglycan binding	14/434	229/17697	0.00161732	0.0202516	0.0162842	PGLYRP3/PGLYRP4/PGLYRP2/LAMC2/REG4/FGFBP1/KNG1/SELL/SERPINC1/APOH/LRTM1/F2/HRG/SOST	14
GO:0019825	GO:0019825	oxygen binding	5/434	36/17697	0.00174587	0.0213962	0.0172045	ALB/CYP1A1/TH/HBE1/CYP2F1	5
GO:0016917	GO:0016917	GABA receptor activity	4/434	22/17697	0.00183767	0.0220521	0.0177319	GABRR3/GABRQ/GABRP/GABRA5	4
GO:0048018	GO:0048018	receptor ligand activity	23/434	482/17697	0.00192151	0.0225875	0.0181625	TTR/IL36G/FLRT2/PTHLH/IL36RN/SPP1/APOA1/CGA/FGF5/EPGN/GAST/PPBP/INSL4/F2/GHRH/SST/GAL/IL36A/FGF20/IL1F10/GUCA2A/DEFB4A/AVP	23
GO:0015144	GO:0015144	carbohydrate transmembrane transporter activity	5/434	37/17697	0.0019786	0.0227935	0.0183281	SLC45A2/AQP7/PPBP/SLC5A1/SLC2A2	5
GO:0050786	GO:0050786	RAGE receptor binding	3/434	11/17697	0.00208705	0.0231181	0.0185891	S100A7/S100A8/S100A12	3
GO:0089720	GO:0089720	caspase binding	3/434	11/17697	0.00208705	0.0231181	0.0185891	NLRP7/CARD17/CARD18	3
GO:0008395	GO:0008395	steroid hydroxylase activity	5/434	38/17697	0.00223321	0.0242703	0.0195156	CYP2C9/CYP1A2/CYP1A1/CYP2F1/CYP2B6	5
GO:0030594	GO:0030594	neurotransmitter receptor activity	9/434	117/17697	0.00236426	0.0252188	0.0202783	HRH3/CHRNA9/GRIA1/DRD5/GRM5/CHRND/GABRA5/OR10H5/HTR3B	9
GO:0016616	GO:0016616	oxidoreductase activity	acting on the CH-OH group of donors	NAD or NADP as acceptor	9/434	119/17697	0.00265324	0.0277867	0.0223431	SDR9C7/ADH6/AKR1B10/ADH7/ALDH3A1/AKR1C1/CYP4A22/LDHAL6A/SDR16C5	9
GO:0045295	GO:0045295	gamma-catenin binding	3/434	12/17697	0.00273239	0.0281046	0.0225987	DSG1/DSC3/CDH2	3
GO:0008201	GO:0008201	heparin binding	11/434	169/17697	0.00307412	0.0310648	0.024979	LAMC2/REG4/FGFBP1/KNG1/SELL/SERPINC1/APOH/LRTM1/F2/HRG/SOST	11
GO:0070325	GO:0070325	lipoprotein particle receptor binding	4/434	26/17697	0.00347643	0.0340516	0.0273807	APOA1/PCSK9/APOA2/APOC3	4
GO:0061783	GO:0061783	peptidoglycan muralytic activity	3/434	13/17697	0.00348793	0.0340516	0.0273807	PGLYRP3/PGLYRP4/PGLYRP2	3
GO:0015081	GO:0015081	sodium ion transmembrane transporter activity	10/434	149/17697	0.00375846	0.0360813	0.0290127	SLC6A17/SLC13A5/SLC17A4/SLC10A6/SLC6A15/ATP12A/SLC28A2/SLC6A14/SLC5A1/HCN1	10
GO:0099094	GO:0099094	ligand-gated cation channel activity	8/434	105/17697	0.00430903	0.0398544	0.0320466	CHRNA9/GRIA1/P2RX3/HCN1/KCNA10/CHRND/KCNJ18/HTR3B	8
GO:0016614	GO:0016614	oxidoreductase activity	acting on CH-OH group of donors	9/434	128/17697	0.004317	0.0398544	0.0320466	SDR9C7/ADH6/AKR1B10/ADH7/ALDH3A1/AKR1C1/CYP4A22/LDHAL6A/SDR16C5	9
GO:0070330	GO:0070330	aromatase activity	3/434	14/17697	0.00435907	0.0398544	0.0320466	CYP4F8/CYP4F12/CYP2F1	3
GO:0015267	GO:0015267	channel activity	21/434	456/17697	0.00447042	0.0402338	0.0323518	CHRNA9/LRRC38/GJB2/AQP7/BEST2/GRIA1/GABRR3/GABRQ/GABRP/AQP12B/P2RX3/HCN1/AQP12A/OTOP3/CACNG6/KCNA10/CHRND/GABRA5/KCNJ18/CLDN17/HTR3B	21
GO:0022803	GO:0022803	passive transmembrane transporter activity	21/434	457/17697	0.00458242	0.0406073	0.032652	CHRNA9/LRRC38/GJB2/AQP7/BEST2/GRIA1/GABRR3/GABRQ/GABRP/AQP12B/P2RX3/HCN1/AQP12A/OTOP3/CACNG6/KCNA10/CHRND/GABRA5/KCNJ18/CLDN17/HTR3B	21
GO:0043177	GO:0043177	organic acid binding	12/434	205/17697	0.00480588	0.0419422	0.0337255	ALB/CYP26B1/S100A8/FABP1/UCP1/FTCD/AKR1C1/AGXT/TH/HBE1/NR1H4/OTC	12
GO:0019215	GO:0019215	intermediate filament binding	3/434	15/17697	0.00535063	0.0459995	0.0369879	PKP1/KRT14/KRT74	3

## Sheet: KEGG
	ID	Description	GeneRatio	BgRatio	pvalue	p.adjust	qvalue	geneID	Count
hsa00830	hsa00830	Retinol metabolism	17/208	67/7946	7.04265e-13	1.62685e-10	1.48266e-10	CYP2C9/UGT2B15/CYP1A2/ADH6/CYP26B1/UGT2B4/CYP4A11/ADH7/RPE65/UGT2B17/CYP1A1/CYP4A22/UGT2B10/UGT2A3/SDR16C5/UGT2B28/CYP2B6	17
hsa00980	hsa00980	Metabolism of xenobiotics by cytochrome P450	16/208	76/7946	7.40533e-11	8.55316e-09	7.79509e-09	CYP2C9/UGT2B15/CYP1A2/ADH6/UGT2B4/ADH7/UGT2B17/ALDH3A1/AKR1C1/CYP1A1/UGT2B10/GSTA2/UGT2A3/UGT2B28/CYP2F1/CYP2B6	16
hsa05204	hsa05204	Chemical carcinogenesis	14/208	82/7946	2.09696e-08	1.61466e-06	1.47155e-06	CYP2C9/UGT2B15/CYP1A2/ADH6/UGT2B4/SULT1A2/ADH7/UGT2B17/ALDH3A1/CYP1A1/UGT2B10/GSTA2/UGT2A3/UGT2B28	14
hsa00982	hsa00982	Drug metabolism - cytochrome P450	13/208	72/7946	3.38971e-08	1.95756e-06	1.78406e-06	CYP2C9/UGT2B15/CYP1A2/ADH6/UGT2B4/ADH7/UGT2B17/ALDH3A1/UGT2B10/GSTA2/UGT2A3/UGT2B28/CYP2B6	13
hsa04080	hsa04080	Neuroactive ligand-receptor interaction	27/208	340/7946	2.07754e-07	9.59825e-06	8.74755e-06	HRH3/GRM3/CHRNA9/KNG1/GHRHR/CGA/AVPR1B/NTSR1/PLG/TAC1/GRIA1/DRD5/GLP1R/F2/GHRH/GRM5/GABRR3/SST/GAL/GABRQ/GABRP/P2RX3/RXFP2/AVP/CHRND/GABRA5/GPR50	27
hsa00140	hsa00140	Steroid hormone biosynthesis	11/208	60/7946	3.38018e-07	1.30137e-05	1.18603e-05	UGT2B15/CYP1A2/UGT2B4/SULT2B1/UGT2B17/AKR1C1/CYP1A1/SULT1E1/UGT2B10/UGT2A3/UGT2B28	11
hsa05150	hsa05150	Staphylococcus aureus infection	12/208	96/7946	6.81653e-06	0.000224946	0.000205009	DSG1/KRT24/KRT16/KRT9/KRT34/KRT38/KRT31/KRT14/KRT32/PLG/KRT12/DEFB4A	12
hsa00040	hsa00040	Pentose and glucuronate interconversions	7/208	34/7946	2.24495e-05	0.000648228	0.000590775	UGT2B15/AKR1B10/UGT2B4/UGT2B17/UGT2B10/UGT2A3/UGT2B28	7
hsa03320	hsa03320	PPAR signaling pathway	10/208	76/7946	2.57279e-05	0.00066035	0.000601823	CYP4A11/APOA1/FABP1/UCP1/AQP7/APOA2/FABP7/CYP4A22/HMGCS2/APOC3	10
hsa00053	hsa00053	Ascorbate and aldarate metabolism	6/208	27/7946	5.59354e-05	0.00129211	0.00117759	UGT2B15/UGT2B4/UGT2B17/UGT2B10/UGT2A3/UGT2B28	6
hsa04610	hsa04610	Complement and coagulation cascades	10/208	85/7946	6.87134e-05	0.00144298	0.00131509	SERPINB2/KNG1/SERPINC1/PLG/F2/F13B/C8B/C8A/CFHR5/FGA	10
hsa04915	hsa04915	Estrogen signaling pathway	12/208	138/7946	0.000253438	0.00487869	0.00444629	EGFR/KRT24/KRT16/KRT9/KRT34/KRT38/KRT31/CREB3L3/KRT14/KRT32/CALML5/KRT12	12
hsa00010	hsa00010	Glycolysis / Gluconeogenesis	8/208	68/7946	0.000369575	0.00656707	0.00598502	ALDOB/ADH6/G6PC/FBP2/ADH7/ALDH3A1/HKDC1/LDHAL6A	8
hsa00860	hsa00860	Porphyrin and chlorophyll metabolism	6/208	42/7946	0.000714712	0.0117928	0.0107476	UGT2B15/UGT2B4/UGT2B17/UGT2B10/UGT2A3/UGT2B28	6
hsa00983	hsa00983	Drug metabolism - other enzymes	8/208	79/7946	0.00102028	0.0157124	0.0143198	CES1/UGT2B15/UGT2B4/UGT2B17/UGT2B10/GSTA2/UGT2A3/UGT2B28	8
hsa00590	hsa00590	Arachidonic acid metabolism	7/208	63/7946	0.00121495	0.0175409	0.0159862	CYP4F2/CYP2C9/CYP4F8/PLA2G4E/CYP4A11/CYP4A22/CYP2B6	7
hsa04976	hsa04976	Bile secretion	7/208	72/7946	0.00265389	0.0360617	0.0328655	BAAT/UGT2B4/SLC5A1/NR1H4/SLC22A7/SLCO1B7/SLCO1B3	7
hsa05033	hsa05033	Nicotine addiction	5/208	40/7946	0.00365676	0.0469284	0.0427691	GRIA1/GABRR3/GABRQ/GABRP/GABRA5	5
