# Supplementary material
Source: Research Square preprint supplement (doi:10.21203/rs.3.rs-8947218/v1)
Supplement: Supplementary file 10 [file 8dd5cc44eb4a8ff21025c16d.xlsx]

## Sheet: Sheet1
Table S2 Reorganization of Plasmid Sequences
Plasmid	Primer	Primer Sequence (5’➡3’)
pCDNA3.1-CMV-RPSAP52-hGHpolya-EFla-EGFP	CMV-F	CGCAAATGGGCGGTAGGCGTG
	23990-R	CTTGCCCCTTGCTCCATACCAC
pCDNA3.1-CMV-MCS-hGHpolya-EF1a-EGFP	CMV-F	CGCAAATGGGCGGTAGGCGTG
	23990-R	CTTGCCCCTTGCTCCATACCAC
