# Supplementary material
Source: Research Square preprint supplement (doi:10.21203/rs.3.rs-8947218/v1)
Supplement: Supplementary file 11 [file c96a341dcf8c7a9b1c1486f1.xlsx]

## Sheet: Sheet1
Table S3 RPSAP52 Primer Sequence
Primer	Primer Sequence(5’➡3’)
RPSAP52-F	ACCAGATCCAGGCAGCCTAC
RPSAP52-R	CTACCACATCTGACCCACTGAG
