# Supplementary material
Source: Research Square preprint supplement (doi:10.21203/rs.3.rs-8947218/v1)
Supplement: Supplementary file 12 [file cf59646f08b9f00f6062e495.xlsx]

## Sheet: BLCA_TIDE
Patient	No benefits	Responder	TIDE	IFNG	MSI Score	CD274	CD8	CTL.flag	Dysfunction	Exclusion	MDSC	CAF	TAM M2
TCGA-E7-A4XJ-01A	FALSE	FALSE	1.93	1.35	0.99	0.07	0.14	FALSE	-1.15	1.93	0.15	0.09	0.02
TCGA-KQ-A41O-01A	FALSE	FALSE	1.8	0.74	0.99	0.16	1.54	FALSE	-1.4	1.8	0.17	0.04	0.03
TCGA-E5-A4U1-01A	FALSE	FALSE	1.75	1.19	0.99	0.44	0.25	FALSE	-1.19	1.75	0.17	0.04	0.03
TCGA-CF-A3MG-01A	FALSE	FALSE	1.57	1.33	0.99	0.19	0.14	FALSE	-1.25	1.57	0.14	0.06	0.01
TCGA-XF-A8HG-01A	FALSE	FALSE	1.48	1.31	0.99	0.44	0.12	FALSE	-1.49	1.48	0.12	0.05	0.03
TCGA-E7-A5KF-01A	FALSE	FALSE	1.32	2.44	1	0.58	0.06	FALSE	-1.24	1.32	0.13	0.04	0
TCGA-FD-A5BS-01A	FALSE	TRUE	-0.14	7.66	0.99	3.26	4.38	TRUE	-0.14	1.45	0.06	0.2	-0.07
TCGA-E7-A519-01A	FALSE	TRUE	-0.19	2.15	0.99	0.64	0.7	TRUE	-0.19	1.39	0.1	0.09	-0.01
TCGA-FD-A5BT-01A	FALSE	TRUE	-0.2	5.19	0.97	2.63	2.82	TRUE	-0.2	2.13	0.1	0.24	-0.04
TCGA-GC-A6I3-11A	FALSE	TRUE	-0.2	3.73	0.99	1.38	2.61	TRUE	-0.2	1.65	0.1	0.14	-0.02
TCGA-FD-A43S-01A	FALSE	TRUE	-0.22	3.46	1	0.65	3.03	TRUE	-0.22	1.82	0.08	0.18	-0.01
TCGA-FD-A62N-01A	FALSE	TRUE	-0.25	8.05	0.99	4.43	4.53	TRUE	-0.25	1.53	0.08	0.19	-0.06
TCGA-K4-A5RI-11A	FALSE	TRUE	-0.32	4.71	1	1.54	3.09	TRUE	-0.32	1.84	0.06	0.23	-0.03
TCGA-4Z-AA7N-01A	FALSE	TRUE	-0.34	4.72	0.98	1.86	2.66	TRUE	-0.34	1.49	0.06	0.17	-0.03
TCGA-DK-A3WY-01A	FALSE	TRUE	-0.36	5.53	0.99	2.08	3.11	TRUE	-0.36	1.32	0.08	0.11	-0.02
TCGA-FD-A43U-01A	FALSE	TRUE	-0.37	3.98	0.98	1.16	2.01	TRUE	-0.37	1.73	0.08	0.18	-0.02
TCGA-DK-A3IU-01A	FALSE	TRUE	-0.41	6.8	0.98	4.39	3.91	TRUE	-0.41	1.5	0.08	0.19	-0.06
TCGA-DK-AA74-01A	FALSE	TRUE	-0.43	5.95	0.97	1.99	2.67	TRUE	-0.43	2.1	0.11	0.23	-0.04
TCGA-K4-A83P-01A	FALSE	TRUE	-0.47	4.65	0.99	1.5	2.64	TRUE	-0.47	1.74	0.08	0.19	-0.03
TCGA-S5-A6DX-01A	FALSE	TRUE	-0.48	4.76	0.98	0.56	1.93	TRUE	-0.48	1.49	0.09	0.12	-0.01
TCGA-XF-A9SL-01A	FALSE	TRUE	-0.49	3.33	0.99	0.72	1.54	TRUE	-0.49	2.22	0.09	0.23	-0.01
TCGA-4Z-AA7W-01A	FALSE	TRUE	-0.5	6.59	1	2.53	4.08	TRUE	-0.5	1.11	0.1	0.08	-0.05
TCGA-XF-A9SI-01A	FALSE	TRUE	-0.5	6.4	0.99	2.96	5.39	TRUE	-0.5	1.5	0.09	0.14	-0.04
TCGA-GU-A766-01A	FALSE	TRUE	-0.53	7.97	0.99	4.6	3.13	TRUE	-0.53	1.35	0.13	0.14	-0.09
TCGA-FD-A3B8-01A	FALSE	TRUE	-0.53	7.08	0.98	2.71	3.3	TRUE	-0.53	1.92	0.09	0.25	-0.07
TCGA-XF-AAN8-01A	FALSE	TRUE	-0.53	3.25	0.97	0.95	1.25	TRUE	-0.53	2.45	0.06	0.33	-0.04
TCGA-GU-A762-01A	FALSE	TRUE	-0.54	6.7	0.99	2.76	3.68	TRUE	-0.54	1.78	0.13	0.16	-0.04
TCGA-ZF-A9R7-01A	FALSE	TRUE	-0.56	6.36	0.99	3.01	3.88	TRUE	-0.56	0.95	0.09	0.06	-0.04
TCGA-SY-A9G5-01A	FALSE	TRUE	-0.57	6.06	0.99	2.57	2.73	TRUE	-0.57	1.9	0.12	0.2	-0.05
TCGA-XF-A9SX-01A	FALSE	TRUE	-0.57	5.43	0.99	3.27	2.23	TRUE	-0.57	2.12	0.12	0.21	-0.04
TCGA-GV-A3QG-01A	FALSE	TRUE	-0.61	5.71	0.97	2.12	3.09	TRUE	-0.61	1.65	0.08	0.19	-0.04
TCGA-DK-A2I4-01A	FALSE	TRUE	-0.63	7.01	0.98	4.92	3.72	TRUE	-0.63	1.37	0.07	0.18	-0.07
TCGA-FD-A6TB-01A	FALSE	TRUE	-0.63	5.14	0.97	1.02	2.94	TRUE	-0.63	1.89	0.11	0.18	-0.02
TCGA-XF-AAME-01A	FALSE	TRUE	-0.64	3.98	0.98	1.49	1.77	TRUE	-0.64	2.29	0.09	0.25	-0.02
TCGA-GC-A3WC-11A	FALSE	TRUE	-0.64	3.24	1	0.95	1.19	TRUE	-0.64	2.28	0.08	0.26	-0.01
TCGA-FD-A5BX-01A	FALSE	TRUE	-0.66	3.15	0.98	0.85	0.6	TRUE	-0.66	2.26	0.11	0.23	-0.02
TCGA-BT-A20O-01A	FALSE	TRUE	-0.67	7.4	0.99	2.63	5.12	TRUE	-0.67	1.41	0.07	0.17	-0.06
TCGA-BT-A2LB-11A	FALSE	TRUE	-0.68	3.23	1	1.31	1.48	TRUE	-0.68	1.48	0.09	0.14	-0.03
TCGA-FD-A6TK-01A	FALSE	TRUE	-0.68	5.8	0.98	3.74	2.39	TRUE	-0.68	2.24	0.14	0.22	-0.04
TCGA-K4-A54R-11A	FALSE	TRUE	-0.69	2.98	0.99	1.75	2.4	TRUE	-0.69	1.88	0.09	0.21	-0.03
TCGA-YC-A8S6-01A	FALSE	TRUE	-0.69	3.12	0.97	2	0.95	TRUE	-0.69	2.05	0.12	0.19	-0.02
TCGA-DK-A1AF-01A	FALSE	TRUE	-0.7	4.51	0.98	1.52	2.13	TRUE	-0.7	2.17	0.11	0.24	-0.04
TCGA-GD-A3OP-11A	FALSE	TRUE	-0.71	5.24	1	1.42	1.68	TRUE	-0.71	1.67	0.09	0.18	-0.03
TCGA-E7-A7XN-01A	FALSE	TRUE	-0.71	7.71	1	4.1	4.01	TRUE	-0.71	0.88	0.12	0.06	-0.08
TCGA-FD-A5C1-01A	FALSE	TRUE	-0.72	6.82	0.98	3.29	2.13	TRUE	-0.72	1.8	0.13	0.18	-0.06
TCGA-BT-A2LA-11A	FALSE	TRUE	-0.73	2.51	1	0.79	2.26	TRUE	-0.73	1.91	0.11	0.16	-0.01
TCGA-CF-A3MF-01A	FALSE	TRUE	-0.73	0.96	0.83	0.27	0.21	TRUE	-0.73	1.43	0.12	0.06	0.01
TCGA-XF-A9SK-01A	FALSE	TRUE	-0.73	4.3	0.95	0.88	1.13	TRUE	-0.73	2.09	0.1	0.21	-0.02
TCGA-FD-A3B7-01A	FALSE	TRUE	-0.73	6.01	0.94	2.94	3.69	TRUE	-0.73	2.15	0.14	0.22	-0.05
TCGA-GC-A3BM-11A	FALSE	TRUE	-0.73	2.76	0.99	0.85	2.77	TRUE	-0.73	2.19	0.1	0.23	-0.02
TCGA-UY-A9PH-01A	FALSE	TRUE	-0.74	5.78	1	1.94	2.41	TRUE	-0.74	1.19	0.09	0.1	-0.04
TCGA-XF-AAN4-01A	FALSE	TRUE	-0.74	5.43	0.99	3.27	1.78	TRUE	-0.74	2.37	0.1	0.28	-0.04
TCGA-CF-A47V-01A	FALSE	TRUE	-0.75	3	0.96	1.09	0.57	TRUE	-0.75	1.58	0.12	0.11	-0.02
TCGA-BL-A13I-01A	FALSE	TRUE	-0.75	4.15	0.96	1.52	1.19	TRUE	-0.75	1.88	0.09	0.18	-0.01
TCGA-ZF-AA58-01A	FALSE	TRUE	-0.75	6.89	0.99	4.36	2.82	TRUE	-0.75	1.7	0.12	0.19	-0.08
TCGA-GC-A6I3-01A	FALSE	TRUE	-0.75	4.13	0.99	1.12	2.19	TRUE	-0.75	1.64	0.13	0.1	0
TCGA-FD-A62S-01A	FALSE	TRUE	-0.75	4.73	0.95	1.22	0.98	TRUE	-0.75	2.52	0.14	0.26	-0.03
TCGA-DK-AA6T-01A	FALSE	TRUE	-0.76	3.58	0.99	1.48	3.02	TRUE	-0.76	1.06	0.08	0.03	0.02
TCGA-G2-AA3C-01A	FALSE	TRUE	-0.76	2.94	0.99	0.65	0.86	TRUE	-0.76	1.92	0.12	0.15	-0.01
TCGA-GD-A6C6-01A	FALSE	TRUE	-0.76	2.27	0.99	0.33	0.19	TRUE	-0.76	1.65	0.15	0.06	0.01
TCGA-FD-A3SQ-01A	FALSE	TRUE	-0.77	3.51	0.96	0.81	0.66	TRUE	-0.77	2.3	0.09	0.26	-0.02
TCGA-DK-A3IQ-01A	FALSE	TRUE	-0.77	2.03	0.91	0.22	0.19	TRUE	-0.77	3.28	0.13	0.36	0
TCGA-GC-A6I1-01A	FALSE	TRUE	-0.77	5.79	1	2.29	3.16	TRUE	-0.77	1.33	0.11	0.12	-0.06
TCGA-CU-A0YR-11A	FALSE	TRUE	-0.78	3.13	1	0.99	1.45	TRUE	-0.78	2.6	0.09	0.29	-0.01
TCGA-FD-A6TG-01A	FALSE	TRUE	-0.78	3.51	0.98	0.56	1.24	TRUE	-0.78	2.17	0.11	0.19	0
TCGA-K4-A5RH-01A	FALSE	TRUE	-0.78	7.3	0.98	4.4	4.52	TRUE	-0.78	1.91	0.11	0.2	-0.05
TCGA-XF-A9SJ-01A	FALSE	TRUE	-0.8	5.06	0.99	2.8	2.32	TRUE	-0.8	1.81	0.12	0.15	-0.02
TCGA-UY-A9PB-01A	FALSE	TRUE	-0.8	6.34	0.98	3.4	2.72	TRUE	-0.8	2	0.14	0.21	-0.06
TCGA-XF-A9SM-01A	FALSE	TRUE	-0.8	6.85	0.99	3.84	3.62	TRUE	-0.8	1.71	0.12	0.16	-0.05
TCGA-XF-A9T3-01A	FALSE	TRUE	-0.8	5.12	0.99	2.94	1.2	TRUE	-0.8	2.47	0.17	0.22	-0.03
TCGA-4Z-AA7Q-01A	FALSE	TRUE	-0.81	6.07	0.99	2.83	3.32	TRUE	-0.81	1.17	0.1	0.09	-0.04
TCGA-DK-AA6M-01A	FALSE	TRUE	-0.81	4.52	0.98	2.91	0.81	TRUE	-0.81	1.97	0.14	0.16	-0.03
TCGA-XF-A9SY-01A	FALSE	TRUE	-0.81	6.94	0.98	4.84	2.54	TRUE	-0.81	2.15	0.17	0.2	-0.07
TCGA-FD-A3SP-01A	FALSE	TRUE	-0.81	5.06	0.97	2.58	1.99	TRUE	-0.81	2.49	0.12	0.29	-0.05
TCGA-UY-A78K-01A	FALSE	TRUE	-0.81	5.37	1	1.68	2.46	TRUE	-0.81	1.36	0.11	0.07	-0.01
TCGA-ZF-A9RD-01A	FALSE	TRUE	-0.82	6.07	0.99	2.78	2.36	TRUE	-0.82	1.69	0.14	0.13	-0.04
TCGA-XF-A9T5-01A	FALSE	TRUE	-0.82	6.35	1	1.71	2.99	TRUE	-0.82	1.38	0.11	0.11	-0.04
TCGA-XF-A9SU-01A	FALSE	TRUE	-0.83	3.74	0.99	0.65	1.06	TRUE	-0.83	2.32	0.14	0.19	0
TCGA-FT-A61P-01A	FALSE	TRUE	-0.83	6.4	1	3.97	1.32	TRUE	-0.83	2.13	0.14	0.21	-0.04
TCGA-XF-A9SP-01A	FALSE	TRUE	-0.84	3.35	0.98	0.51	1.13	TRUE	-0.84	2.61	0.13	0.24	0
TCGA-GD-A2C5-11A	FALSE	TRUE	-0.84	3.01	0.99	0.57	2.44	TRUE	-0.84	1.83	0.1	0.16	-0.01
TCGA-FD-A3B3-01A	FALSE	TRUE	-0.84	6.33	0.99	3.29	2.53	TRUE	-0.84	1.98	0.14	0.2	-0.07
TCGA-XF-AAMH-01A	FALSE	TRUE	-0.85	2.05	0.99	0.24	3.86	TRUE	-0.85	2.48	0.18	0.15	0.02
TCGA-BT-A42F-01A	FALSE	TRUE	-0.85	5.32	1	2.26	2.28	TRUE	-0.85	1.17	0.1	0.09	-0.04
TCGA-BT-A20W-11A	FALSE	TRUE	-0.85	4.11	0.99	1	2.66	TRUE	-0.85	2.61	0.12	0.27	-0.02
TCGA-G2-A2EC-01A	FALSE	TRUE	-0.86	3.01	0.95	0.58	1.04	TRUE	-0.86	2.29	0.1	0.21	0.01
TCGA-CU-A3YL-01A	FALSE	TRUE	-0.86	2.96	0.97	0.62	1.33	TRUE	-0.86	1.66	0.13	0.1	0
TCGA-CF-A3MI-01A	FALSE	TRUE	-0.86	1.74	0.93	0.24	0.57	TRUE	-0.86	1.5	0.12	0.08	0
TCGA-ZF-AA52-01A	FALSE	TRUE	-0.86	3.32	0.99	0.93	1.04	TRUE	-0.86	2.28	0.12	0.22	-0.01
TCGA-DK-A2HX-01A	FALSE	TRUE	-0.86	2.53	0.98	0.43	0.53	TRUE	-0.86	2.45	0.12	0.25	-0.02
TCGA-CF-A47S-01A	FALSE	TRUE	-0.86	3.8	0.99	0.91	0.32	TRUE	-0.86	1.37	0.11	0.08	-0.01
TCGA-GC-A3RC-01A	FALSE	TRUE	-0.87	5.38	0.99	2.33	2.01	TRUE	-0.87	1.64	0.13	0.13	-0.04
TCGA-ZF-AA5P-01A	FALSE	TRUE	-0.87	3.64	0.98	1.33	1.01	TRUE	-0.87	2.47	0.13	0.25	-0.03
TCGA-CU-A0YO-01A	FALSE	TRUE	-0.87	4.19	0.99	1.42	0.76	TRUE	-0.87	1.78	0.11	0.16	-0.02
TCGA-DK-AA6S-01A	FALSE	TRUE	-0.87	5.67	0.94	1.3	1.25	TRUE	-0.87	2.39	0.14	0.24	-0.03
TCGA-BL-A5ZZ-01A	FALSE	TRUE	-0.87	2.93	0.98	1.93	1.9	TRUE	-0.87	2.76	0.15	0.27	-0.02
TCGA-UY-A9PA-01A	FALSE	TRUE	-0.87	5.02	0.99	2.62	1.96	TRUE	-0.87	1.26	0.12	0.1	-0.06
TCGA-UY-A78P-01A	FALSE	TRUE	-0.87	6.25	1	2.22	2.36	TRUE	-0.87	1.47	0.11	0.13	-0.05
TCGA-4Z-AA83-01A	FALSE	TRUE	-0.87	3.88	0.98	1.72	0.37	TRUE	-0.87	1.72	0.12	0.14	-0.03
TCGA-XF-AAMJ-01A	FALSE	TRUE	-0.87	3.03	0.96	0.51	0.81	TRUE	-0.87	2.84	0.13	0.3	-0.01
TCGA-FD-A5BR-01A	FALSE	TRUE	-0.87	3.07	0.99	0.78	0.62	TRUE	-0.87	2.06	0.12	0.17	0
TCGA-GU-AATP-01A	FALSE	TRUE	-0.88	3.82	0.9	1.29	2.11	TRUE	-0.88	2.23	0.14	0.21	-0.02
TCGA-K4-A3WU-01B	FALSE	TRUE	-0.88	3.35	0.99	1.5	2.46	TRUE	-0.88	1.86	0.09	0.18	-0.01
TCGA-BT-A2LB-01A	FALSE	TRUE	-0.88	4.37	0.99	1.48	1.29	TRUE	-0.88	2.05	0.14	0.18	-0.03
TCGA-GD-A3OQ-11A	FALSE	TRUE	-0.88	2.52	1	0.74	2.12	TRUE	-0.88	2.34	0.09	0.25	0
TCGA-FD-A6TA-01A	FALSE	TRUE	-0.88	4.25	0.98	1.23	1.46	TRUE	-0.88	1.98	0.11	0.18	-0.02
TCGA-XF-A9SZ-01A	FALSE	TRUE	-0.89	2.56	0.98	0.76	0.54	TRUE	-0.89	2.16	0.12	0.2	-0.02
TCGA-4Z-AA86-01A	FALSE	TRUE	-0.89	6.1	0.99	3.07	2.9	TRUE	-0.89	1.99	0.14	0.2	-0.06
TCGA-FD-A6TD-01A	FALSE	TRUE	-0.9	4.99	0.99	3	1.75	TRUE	-0.9	1.98	0.14	0.17	-0.04
TCGA-K4-A3WS-01A	FALSE	TRUE	-0.9	4.88	0.94	1.25	1.66	TRUE	-0.9	2.45	0.12	0.25	-0.02
TCGA-UY-A8OD-01A	FALSE	TRUE	-0.9	3.6	0.97	0.54	1.59	TRUE	-0.9	2.28	0.12	0.21	0
TCGA-FD-A62P-01A	FALSE	TRUE	-0.9	4.74	0.99	0.91	2.01	TRUE	-0.9	1.99	0.13	0.17	-0.02
TCGA-XF-A9T8-01A	FALSE	TRUE	-0.9	6.45	1	3.5	2.89	TRUE	-0.9	1.55	0.12	0.15	-0.06
TCGA-FD-A5BU-01A	FALSE	TRUE	-0.9	3.95	0.99	2.84	0.82	TRUE	-0.9	2.11	0.12	0.21	-0.04
TCGA-ZF-A9R9-01A	FALSE	TRUE	-0.91	2.85	0.97	0.66	0.38	TRUE	-0.91	2.4	0.11	0.23	0
TCGA-ZF-A9R0-01A	FALSE	TRUE	-0.91	3.49	0.99	1.71	0.75	TRUE	-0.91	1.92	0.12	0.14	0
TCGA-E7-A97P-01A	FALSE	TRUE	-0.91	7.63	1	3.41	3.78	TRUE	-0.91	1.8	0.15	0.17	-0.07
TCGA-ZF-AA53-01A	FALSE	TRUE	-0.91	5.68	0.98	2.78	1.74	TRUE	-0.91	1.96	0.12	0.2	-0.05
TCGA-FD-A3B4-01A	FALSE	TRUE	-0.91	5.03	0.99	2.71	1.35	TRUE	-0.91	2.13	0.15	0.2	-0.05
TCGA-R3-A69X-01A	FALSE	TRUE	-0.91	3.77	0.98	0.66	1.53	TRUE	-0.91	2.03	0.11	0.18	-0.01
TCGA-K4-A5RJ-01A	FALSE	TRUE	-0.91	7.13	1	2.42	4.25	TRUE	-0.91	1.13	0.05	0.12	-0.04
TCGA-XF-A8HD-01A	FALSE	TRUE	-0.91	6.93	0.99	3.53	3.12	TRUE	-0.91	1.6	0.14	0.14	-0.06
TCGA-GU-A767-01A	FALSE	TRUE	-0.91	2.53	0.99	0.28	0.35	TRUE	-0.91	2.21	0.16	0.15	0.01
TCGA-K4-A4AB-01B	FALSE	TRUE	-0.92	2.9	0.98	1.03	0.42	TRUE	-0.92	2.22	0.11	0.22	-0.02
TCGA-K4-A3WV-11A	FALSE	TRUE	-0.92	2.66	1	0.62	1.68	TRUE	-0.92	1.8	0.1	0.14	0.01
TCGA-E7-A541-01A	FALSE	TRUE	-0.92	4.62	0.99	1.06	2.97	TRUE	-0.92	1.53	0.13	0.09	-0.02
TCGA-BT-A20Q-01A	FALSE	TRUE	-0.92	4.84	0.98	1.1	1.76	TRUE	-0.92	1.96	0.1	0.2	-0.03
TCGA-DK-A3WX-01A	FALSE	TRUE	-0.93	5.24	0.97	2.04	1.82	TRUE	-0.93	2.01	0.15	0.17	-0.05
TCGA-K4-A54R-01A	FALSE	TRUE	-0.93	5.89	1	3.1	2.08	TRUE	-0.93	1.92	0.13	0.18	-0.04
TCGA-CF-A1HR-01A	FALSE	TRUE	-0.93	2.97	0.99	0.4	1.28	TRUE	-0.93	1.65	0.11	0.12	-0.01
TCGA-GU-A764-01A	FALSE	TRUE	-0.93	4.59	0.95	4.3	1.45	TRUE	-0.93	2.08	0.14	0.18	-0.03
TCGA-GD-A76B-01A	FALSE	TRUE	-0.94	5.21	0.99	0.96	1.79	TRUE	-0.94	1.26	0.11	0.07	-0.02
TCGA-BT-A3PK-01A	FALSE	TRUE	-0.94	4.8	0.97	2.22	0.91	TRUE	-0.94	2.18	0.16	0.19	-0.04
TCGA-E7-A7DV-01A	FALSE	TRUE	-0.94	4.69	0.98	1.69	1.1	TRUE	-0.94	1.8	0.1	0.18	-0.03
TCGA-XF-A9T2-01A	FALSE	TRUE	-0.94	2.07	0.99	0.32	3.64	TRUE	-0.94	2.45	0.17	0.17	0.01
TCGA-KQ-A41P-01A	FALSE	TRUE	-0.94	3.19	0.99	0.35	0.8	TRUE	-0.94	2.08	0.14	0.15	0.01
TCGA-BT-A20U-11A	FALSE	TRUE	-0.94	2.81	1	1.12	1.81	TRUE	-0.94	1.68	0.1	0.13	0
TCGA-E7-A3X6-01A	FALSE	TRUE	-0.94	6.38	0.99	1.53	1.89	TRUE	-0.94	1.59	0.13	0.12	-0.04
TCGA-CF-A47W-01A	FALSE	TRUE	-0.95	1.43	1	0.32	0.2	TRUE	-0.95	1.64	0.14	0.06	0.02
TCGA-ZF-AA5H-01A	FALSE	TRUE	-0.95	5.59	0.99	3.99	1.51	TRUE	-0.95	1.96	0.15	0.17	-0.05
TCGA-FD-A5BZ-01A	FALSE	TRUE	-0.95	2.99	0.97	0.74	0.2	TRUE	-0.95	2.88	0.15	0.28	0
TCGA-XF-A9SW-01A	FALSE	TRUE	-0.95	3.2	0.99	0.81	0.81	TRUE	-0.95	2.64	0.11	0.29	-0.02
TCGA-GU-AATO-01A	FALSE	TRUE	-0.95	4.12	0.99	0.75	1.61	TRUE	-0.95	1.66	0.11	0.13	-0.02
TCGA-XF-A9T4-01A	FALSE	TRUE	-0.95	5.61	0.98	4.14	1.12	TRUE	-0.95	2.26	0.18	0.19	-0.05
TCGA-SY-A9G0-01A	FALSE	TRUE	-0.95	2.67	0.98	0.88	0.87	TRUE	-0.95	2.69	0.12	0.27	0
TCGA-FD-A3B6-01A	FALSE	TRUE	-0.95	5.86	0.99	5.13	2.59	TRUE	-0.95	1.75	0.15	0.13	-0.04
TCGA-DK-A6B2-01A	FALSE	TRUE	-0.96	4.81	0.98	1.04	1.64	TRUE	-0.96	1.85	0.1	0.18	-0.02
TCGA-E7-A678-01A	FALSE	TRUE	-0.96	2.15	1	0.48	0.61	TRUE	-0.96	1.35	0.11	0.05	0.01
TCGA-XF-AAMQ-01A	FALSE	TRUE	-0.96	6.29	0.99	1.07	2.3	TRUE	-0.96	1.58	0.14	0.11	-0.03
TCGA-DK-A6AW-01A	FALSE	TRUE	-0.96	2.55	1	1.27	0.6	TRUE	-0.96	1.68	0.13	0.11	-0.01
TCGA-CF-A8HY-01A	FALSE	TRUE	-0.96	1.38	0.98	0.15	0.58	TRUE	-0.96	1.84	0.16	0.09	0.01
TCGA-YF-AA3L-01A	FALSE	TRUE	-0.96	1.73	0.99	0.29	0.07	TRUE	-0.96	1.74	0.14	0.08	0.02
TCGA-XF-AAN0-01A	FALSE	TRUE	-0.96	4.04	0.99	0.62	1.82	TRUE	-0.96	1.51	0.11	0.12	-0.02
TCGA-E7-A6MD-01A	FALSE	TRUE	-0.97	3.34	0.99	0.81	1.48	TRUE	-0.97	1.88	0.11	0.16	-0.01
TCGA-CF-A47Y-01A	FALSE	TRUE	-0.97	1.65	0.99	0.4	0.55	TRUE	-0.97	1.59	0.12	0.08	0.01
TCGA-XF-AAMT-01A	FALSE	TRUE	-0.97	3.17	0.95	1.43	1.32	TRUE	-0.97	2.61	0.16	0.25	-0.03
TCGA-DK-A3IV-01A	FALSE	TRUE	-0.97	5.11	0.99	1.94	1.77	TRUE	-0.97	1.01	0.11	0.04	-0.03
TCGA-FD-A3SL-01A	FALSE	TRUE	-0.97	4.67	0.98	0.99	1.02	TRUE	-0.97	2.3	0.11	0.24	-0.02
TCGA-ZF-AA51-01A	FALSE	TRUE	-0.97	4.71	0.96	1.31	1.71	TRUE	-0.97	1.83	0.13	0.15	-0.03
TCGA-FD-A3SR-01A	FALSE	TRUE	-0.97	4.63	0.98	0.91	1.92	TRUE	-0.97	1.75	0.1	0.17	-0.03
TCGA-ZF-AA56-01A	FALSE	TRUE	-0.98	4	0.99	1.02	0.68	TRUE	-0.98	1.89	0.13	0.16	-0.03
TCGA-FD-A43X-01A	FALSE	TRUE	-0.98	1.36	0.97	0.45	0.38	TRUE	-0.98	1.68	0.14	0.07	0.01
TCGA-E7-A8O7-01A	FALSE	TRUE	-0.98	3.35	0.99	1.33	0.73	TRUE	-0.98	1.36	0.1	0.1	-0.02
TCGA-XF-AAN3-01A	FALSE	TRUE	-0.98	3.4	0.99	0.79	0.55	TRUE	-0.98	1.96	0.11	0.19	-0.02
TCGA-CF-A7I0-01A	FALSE	TRUE	-0.98	2.09	0.99	0.41	1.01	TRUE	-0.98	1.98	0.12	0.13	0.02
TCGA-K4-A6FZ-01A	FALSE	TRUE	-0.98	4.86	1	3.63	1.25	TRUE	-0.98	1.55	0.14	0.12	-0.05
TCGA-DK-A1AB-01A	FALSE	TRUE	-0.99	6.23	0.99	1.39	0.94	TRUE	-0.99	2.22	0.12	0.25	-0.05
TCGA-E7-A7DU-01A	FALSE	TRUE	-0.99	1.96	0.98	0.34	0.39	TRUE	-0.99	1.67	0.14	0.08	0
TCGA-CF-A3MH-01A	FALSE	TRUE	-0.99	1.89	0.99	0.15	0.12	TRUE	-0.99	1.73	0.14	0.08	0
TCGA-BT-A2LD-01A	FALSE	TRUE	-0.99	3.49	0.97	3.31	1.17	TRUE	-0.99	2.04	0.15	0.16	-0.03
TCGA-FJ-A871-01A	FALSE	TRUE	-0.99	1.54	0.99	1.32	0.3	TRUE	-0.99	3.09	0.22	0.21	0.02
TCGA-FD-A43P-01A	FALSE	TRUE	-0.99	6.02	0.97	2.33	3.37	TRUE	-0.99	1.52	0.13	0.11	-0.03
TCGA-5N-A9KI-01A	FALSE	TRUE	-0.99	3.07	0.99	0.85	0.64	TRUE	-0.99	1.81	0.11	0.17	-0.03
TCGA-BT-A20T-01A	FALSE	TRUE	-1	4.8	0.98	0.68	1.7	TRUE	-1	2.15	0.14	0.19	-0.02
TCGA-CF-A9FF-01A	FALSE	TRUE	-1	2.7	0.98	0.41	0.87	TRUE	-1	1.75	0.12	0.12	0
TCGA-BT-A20N-11A	FALSE	TRUE	-1	2.48	1	0.83	0.24	TRUE	-1	2.61	0.08	0.33	-0.02
TCGA-DK-A2I1-01A	FALSE	TRUE	-1	4.35	0.98	0.59	0.94	TRUE	-1	2.09	0.12	0.19	0
TCGA-GC-A3I6-01A	FALSE	TRUE	-1	5.67	1	2.58	1.01	TRUE	-1	1.73	0.14	0.14	-0.05
TCGA-DK-AA6L-01A	FALSE	TRUE	-1.01	3.82	0.98	1.08	0.81	TRUE	-1.01	1.75	0.14	0.11	-0.01
TCGA-FD-A43Y-01A	FALSE	TRUE	-1.01	5.43	0.98	2.02	1.16	TRUE	-1.01	2.17	0.15	0.19	-0.04
TCGA-FD-A6TH-01A	FALSE	TRUE	-1.01	3.4	0.97	3.72	0.6	TRUE	-1.01	2.05	0.14	0.17	-0.03
TCGA-BT-A42E-01A	FALSE	TRUE	-1.01	5.87	0.98	2.02	2.11	TRUE	-1.01	1.61	0.14	0.13	-0.05
TCGA-XF-AAMW-01A	FALSE	TRUE	-1.03	4.46	0.97	2.53	0.43	TRUE	-1.03	2.26	0.18	0.19	-0.04
TCGA-FD-A6TF-01A	FALSE	TRUE	-1.03	3.23	0.98	2.97	0.98	TRUE	-1.03	2.56	0.16	0.21	-0.01
TCGA-GV-A3JV-01A	FALSE	TRUE	-1.03	4.32	0.99	1.93	1.75	TRUE	-1.03	1.89	0.13	0.15	-0.01
TCGA-DK-A3WW-01A	FALSE	TRUE	-1.03	6.75	1	5.18	3.35	TRUE	-1.03	1.4	0.14	0.11	-0.07
TCGA-BT-A20J-01A	FALSE	TRUE	-1.03	5.5	0.91	1.53	2.53	TRUE	-1.03	1.49	0.11	0.11	-0.02
TCGA-4Z-AA81-01A	FALSE	TRUE	-1.04	6	1	3.82	2.36	TRUE	-1.04	1.36	0.15	0.07	-0.04
TCGA-DK-A6B5-01A	FALSE	TRUE	-1.04	4.39	0.98	1.18	1.35	TRUE	-1.04	1.63	0.12	0.12	-0.03
TCGA-E7-A677-01A	FALSE	TRUE	-1.04	3.55	0.99	2.32	0.66	TRUE	-1.04	1.95	0.14	0.14	-0.02
TCGA-GU-A763-01A	FALSE	TRUE	-1.04	1.94	1	0.34	0.6	TRUE	-1.04	1.62	0.14	0.05	0.02
TCGA-DK-A3IN-01A	FALSE	TRUE	-1.04	4.01	0.94	2.43	1.47	TRUE	-1.04	2.26	0.15	0.19	-0.02
TCGA-BT-A20R-11A	FALSE	TRUE	-1.04	2.32	1	2.12	0.16	TRUE	-1.04	2.71	0.09	0.34	-0.03
TCGA-DK-A6B0-01A	FALSE	TRUE	-1.04	1.87	1	0.69	0.46	TRUE	-1.04	1.58	0.13	0.07	0
TCGA-GD-A3OP-01A	FALSE	TRUE	-1.04	3.53	0.99	0.81	1.51	TRUE	-1.04	1.96	0.1	0.17	0
TCGA-FD-A43N-01A	FALSE	TRUE	-1.05	3.06	0.97	0.98	0.64	TRUE	-1.05	2.05	0.14	0.17	-0.02
TCGA-ZF-AA54-01A	FALSE	TRUE	-1.05	4.35	0.97	2.96	1.33	TRUE	-1.05	2.1	0.13	0.19	-0.03
TCGA-BT-A20P-01A	FALSE	TRUE	-1.05	2.27	0.99	0.32	1.32	TRUE	-1.05	1.99	0.16	0.12	-0.01
TCGA-CF-A8HX-01A	FALSE	TRUE	-1.05	1.4	0.97	0.32	0.06	TRUE	-1.05	1.78	0.15	0.08	0.01
TCGA-GC-A3WC-01A	FALSE	TRUE	-1.05	6.29	1	4.08	2.45	TRUE	-1.05	1.46	0.11	0.12	-0.04
TCGA-FD-A6TC-01A	FALSE	TRUE	-1.05	2.27	0.98	0.99	0.23	TRUE	-1.05	2.43	0.15	0.21	-0.01
TCGA-CF-A9FH-01A	FALSE	TRUE	-1.06	3.77	1	1.57	0.51	TRUE	-1.06	1.4	0.14	0.06	-0.03
TCGA-BL-A13J-11A	FALSE	TRUE	-1.06	1.75	1	0.77	0.04	TRUE	-1.06	2.68	0.08	0.31	0
TCGA-XF-AAMR-01A	FALSE	TRUE	-1.06	2.54	0.99	0.52	0.37	TRUE	-1.06	2.44	0.11	0.24	0
TCGA-E7-A97Q-01A	FALSE	TRUE	-1.06	3.69	0.96	1.1	2.12	TRUE	-1.06	2.01	0.13	0.17	-0.01
TCGA-FD-A6TI-01A	FALSE	TRUE	-1.06	2.75	1	0.37	1.11	TRUE	-1.06	1.87	0.1	0.17	-0.01
TCGA-UY-A78O-01A	FALSE	TRUE	-1.06	2.47	0.99	1.55	0.17	TRUE	-1.06	1.77	0.13	0.1	0.01
TCGA-GV-A3QK-01B	FALSE	TRUE	-1.06	3.57	1	1.14	1.4	TRUE	-1.06	1.28	0.11	0.06	-0.01
TCGA-XF-A9SH-01A	FALSE	TRUE	-1.06	1.92	1	0.39	0.25	TRUE	-1.06	1.84	0.11	0.12	0.02
TCGA-GC-A3OO-01A	FALSE	TRUE	-1.06	3.05	0.99	0.82	0.35	TRUE	-1.06	2.17	0.13	0.18	-0.01
TCGA-2F-A9KO-01A	FALSE	TRUE	-1.06	6.26	0.99	2.04	2.88	TRUE	-1.06	1.63	0.12	0.14	-0.04
TCGA-ZF-A9R3-01A	FALSE	TRUE	-1.07	2.96	0.99	0.81	0.45	TRUE	-1.07	1.56	0.11	0.12	-0.01
TCGA-XF-A8HE-01A	FALSE	TRUE	-1.07	5.46	1	2.88	2.3	TRUE	-1.07	1.54	0.14	0.13	-0.06
TCGA-HQ-A5NE-01A	FALSE	TRUE	-1.07	3.8	0.99	2.27	0.47	TRUE	-1.07	2.13	0.16	0.17	-0.04
TCGA-UY-A8OB-01A	FALSE	TRUE	-1.07	4.83	0.99	3.02	1.3	TRUE	-1.07	1.93	0.18	0.12	-0.04
TCGA-G2-A2EK-01A	FALSE	TRUE	-1.07	2.45	0.99	0.31	0.54	TRUE	-1.07	1.81	0.11	0.12	0.02
TCGA-UY-A8OC-01A	FALSE	TRUE	-1.07	2.31	0.97	1.14	0.21	TRUE	-1.07	2.79	0.19	0.24	-0.02
TCGA-UY-A9PF-01A	FALSE	TRUE	-1.07	3.15	0.99	1.08	0.85	TRUE	-1.07	1.81	0.11	0.13	0
TCGA-CU-A72E-01A	FALSE	TRUE	-1.07	2.41	1	0.21	0.4	TRUE	-1.07	2.1	0.13	0.16	0
TCGA-CF-A9FM-01A	FALSE	TRUE	-1.07	2.71	1	1.31	0.48	TRUE	-1.07	1.33	0.1	0.09	-0.02
TCGA-G2-A2EO-01A	FALSE	TRUE	-1.08	4.87	1	0.69	2.45	TRUE	-1.08	2.19	0.15	0.17	-0.01
TCGA-FD-A3SN-01A	FALSE	TRUE	-1.08	4.22	0.99	2.04	0.87	TRUE	-1.08	2.22	0.16	0.17	-0.02
TCGA-DK-AA6Q-01A	FALSE	TRUE	-1.08	4.96	0.99	1.82	2.95	TRUE	-1.08	1.57	0.14	0.09	-0.02
TCGA-ZF-A9RC-01A	FALSE	TRUE	-1.08	2.02	0.96	0.28	0.3	TRUE	-1.08	2.7	0.17	0.21	0.01
TCGA-BT-A20Q-11A	FALSE	TRUE	-1.08	1.7	1	0.33	0.08	TRUE	-1.08	2.89	0.09	0.32	0.01
TCGA-DK-A1AG-01A	FALSE	TRUE	-1.08	2.31	1	0.24	1.21	TRUE	-1.08	1.69	0.14	0.09	0
TCGA-LC-A66R-01A	FALSE	TRUE	-1.08	5.76	0.99	3.15	2.65	TRUE	-1.08	1.81	0.16	0.14	-0.05
TCGA-PQ-A6FN-01A	FALSE	TRUE	-1.08	3.23	0.99	0.94	0.82	TRUE	-1.08	2.15	0.16	0.14	0
TCGA-KQ-A41N-01A	FALSE	TRUE	-1.08	1.31	0.97	0.3	0.1	TRUE	-1.08	2.09	0.16	0.11	0.02
TCGA-GD-A3OS-01A	FALSE	TRUE	-1.08	2.61	0.96	0.41	1.81	TRUE	-1.08	3	0.19	0.25	0
TCGA-E7-A3Y1-01A	FALSE	TRUE	-1.09	1.76	1	0.4	0.63	TRUE	-1.09	1.68	0.13	0.08	0.01
TCGA-XF-AAMY-01A	FALSE	TRUE	-1.09	2.6	0.99	0.42	0.2	TRUE	-1.09	2.17	0.12	0.18	0
TCGA-GV-A3JX-01A	FALSE	TRUE	-1.09	5.21	0.98	1.72	1.66	TRUE	-1.09	1.49	0.13	0.09	-0.03
TCGA-CU-A0YN-01A	FALSE	TRUE	-1.09	3.39	0.99	1.34	1.59	TRUE	-1.09	2.03	0.15	0.17	-0.03
TCGA-CF-A5U8-01A	FALSE	TRUE	-1.09	1.77	1	0.22	0.64	TRUE	-1.09	1.58	0.12	0.07	0.01
TCGA-K4-AAQO-01A	FALSE	TRUE	-1.09	3.94	0.99	0.58	1.11	TRUE	-1.09	2.35	0.12	0.2	0.01
TCGA-ZF-A9RF-01A	FALSE	TRUE	-1.1	5.38	1	4.01	3.93	TRUE	-1.1	1.79	0.14	0.13	-0.03
TCGA-DK-A3IL-01A	FALSE	TRUE	-1.1	1.98	0.96	0.25	0.18	TRUE	-1.1	2.14	0.15	0.14	0.01
TCGA-MV-A51V-01A	FALSE	TRUE	-1.1	2.27	0.98	0.6	0.45	TRUE	-1.1	1.84	0.15	0.11	0
TCGA-G2-AA3D-01A	FALSE	TRUE	-1.11	1.92	1	0.45	0.38	TRUE	-1.11	1.61	0.15	0.07	0
TCGA-XF-A8HH-01A	FALSE	TRUE	-1.11	2.9	0.99	0.69	0.48	TRUE	-1.11	2.13	0.12	0.18	0
TCGA-K4-A4AC-01A	FALSE	TRUE	-1.11	4.93	0.99	1.06	0.67	TRUE	-1.11	1.86	0.16	0.13	-0.04
TCGA-DK-A6B6-01A	FALSE	TRUE	-1.11	4.58	1	1.24	0.77	TRUE	-1.11	1.01	0.09	0.04	-0.02
TCGA-XF-AAMZ-01A	FALSE	TRUE	-1.11	2.4	0.99	0.39	0.48	TRUE	-1.11	1.87	0.16	0.08	0.01
TCGA-DK-A3IT-01A	FALSE	TRUE	-1.11	3.51	0.99	0.33	0.68	TRUE	-1.11	2.03	0.13	0.16	0
TCGA-E7-A8O8-01A	FALSE	TRUE	-1.11	2.29	0.99	0.48	0.35	TRUE	-1.11	1.84	0.16	0.07	0.02
TCGA-CU-A0YN-11A	FALSE	TRUE	-1.11	1.95	1	0.5	0.18	TRUE	-1.11	3.25	0.13	0.34	0.01
TCGA-XF-A8HF-01A	FALSE	TRUE	-1.11	2.58	0.99	0.45	0.33	TRUE	-1.11	2.19	0.14	0.15	0.02
TCGA-G2-A3IB-01A	FALSE	TRUE	-1.12	2.74	0.99	0.7	0.36	TRUE	-1.12	1.71	0.15	0.11	-0.03
TCGA-YC-A89H-01A	FALSE	TRUE	-1.12	3.68	1	0.9	0.65	TRUE	-1.12	2.05	0.15	0.13	0
TCGA-UY-A78M-01A	FALSE	TRUE	-1.13	1.83	0.99	0.41	0.12	TRUE	-1.13	2.31	0.16	0.16	0.01
TCGA-4Z-AA82-01A	FALSE	TRUE	-1.13	3.56	0.98	1.13	0.17	TRUE	-1.13	2.3	0.17	0.19	-0.03
TCGA-CF-A5UA-01A	FALSE	TRUE	-1.13	1.51	1	0.07	0.37	TRUE	-1.13	1.93	0.16	0.08	0.02
TCGA-G2-A2EJ-01A	FALSE	TRUE	-1.13	4.67	1	3.13	1.02	TRUE	-1.13	1.55	0.17	0.1	-0.07
TCGA-FD-A3N5-01A	FALSE	TRUE	-1.13	4.86	1	2.93	0.88	TRUE	-1.13	2.01	0.17	0.15	-0.04
TCGA-GV-A40E-01A	FALSE	TRUE	-1.13	3.66	0.99	4.1	1.36	TRUE	-1.13	2.17	0.18	0.17	-0.05
TCGA-G2-A3IE-01A	FALSE	TRUE	-1.13	1.68	0.98	0.4	0.26	TRUE	-1.13	1.63	0.11	0.09	0.02
TCGA-KQ-A41S-01A	FALSE	TRUE	-1.14	2.95	0.99	0.35	0.74	TRUE	-1.14	2.3	0.13	0.2	-0.01
TCGA-E7-A6MF-01A	FALSE	TRUE	-1.14	2.45	1	1.28	0.65	TRUE	-1.14	1.47	0.1	0.09	0.01
TCGA-FD-A3NA-01A	FALSE	TRUE	-1.14	4.28	0.98	0.99	1.46	TRUE	-1.14	2	0.15	0.15	-0.02
TCGA-DK-A2I2-01A	FALSE	TRUE	-1.15	4.33	0.97	1.6	0.96	TRUE	-1.15	2.22	0.16	0.18	-0.03
TCGA-CF-A47T-01A	FALSE	TRUE	-1.15	1.03	0.99	0.11	0.07	TRUE	-1.15	2.09	0.17	0.09	0.03
TCGA-H4-A2HO-01A	FALSE	TRUE	-1.15	2.87	0.98	0.26	1.19	TRUE	-1.15	1.58	0.09	0.11	0.01
TCGA-LT-A8JT-01A	FALSE	TRUE	-1.15	2.97	1	0.26	0.84	TRUE	-1.15	1.57	0.12	0.09	0
TCGA-XF-A9T6-01A	FALSE	TRUE	-1.15	3.37	0.99	2.4	0.93	TRUE	-1.15	1.95	0.18	0.1	-0.01
TCGA-G2-A2EF-01A	FALSE	TRUE	-1.15	5.85	0.96	4.56	2.39	TRUE	-1.15	1.84	0.17	0.15	-0.06
TCGA-ZF-A9R1-01A	FALSE	TRUE	-1.15	2.35	0.98	0.58	1.26	TRUE	-1.15	2.06	0.16	0.13	0
TCGA-BT-A3PH-01A	FALSE	TRUE	-1.15	1.5	1	0.23	0.24	TRUE	-1.15	1.78	0.13	0.11	0
TCGA-DK-A3IK-01A	FALSE	TRUE	-1.15	2.75	0.94	0.4	0.55	TRUE	-1.15	2.09	0.13	0.16	0.01
TCGA-CU-A0YR-01A	FALSE	TRUE	-1.16	4.82	0.98	2.79	1.03	TRUE	-1.16	1.54	0.1	0.14	-0.03
TCGA-BT-A0YX-01A	FALSE	TRUE	-1.16	4.35	1	1.06	2.11	TRUE	-1.16	1.58	0.12	0.12	-0.03
TCGA-4Z-AA7O-01A	FALSE	TRUE	-1.16	4.71	1	0.52	1.7	TRUE	-1.16	1.86	0.14	0.13	-0.01
TCGA-FD-A3SO-01A	FALSE	TRUE	-1.16	4.61	0.99	2.15	0.77	TRUE	-1.16	1.99	0.14	0.18	-0.04
TCGA-DK-A1A7-01A	FALSE	TRUE	-1.16	1.93	0.94	0.32	0.71	TRUE	-1.16	1.91	0.15	0.1	0.01
TCGA-GD-A3OQ-01A	FALSE	TRUE	-1.16	3.39	1	1.51	0.38	TRUE	-1.16	2.11	0.17	0.15	-0.03
TCGA-DK-AA71-01A	FALSE	TRUE	-1.16	3.47	1	0.62	0.84	TRUE	-1.16	1.89	0.16	0.1	0
TCGA-G2-A2ES-01A	FALSE	TRUE	-1.16	6.15	1	2.51	1.09	TRUE	-1.16	1.68	0.15	0.13	-0.06
TCGA-ZF-AA5N-01A	FALSE	TRUE	-1.16	2.63	1	0.71	0.1	TRUE	-1.16	1.86	0.15	0.11	-0.01
TCGA-BT-A20W-01A	FALSE	TRUE	-1.16	3.5	0.98	0.63	1.61	TRUE	-1.16	1.99	0.15	0.12	0
TCGA-FD-A3B5-01A	FALSE	TRUE	-1.17	2.46	0.99	1.19	0.74	TRUE	-1.17	2.27	0.17	0.17	-0.02
TCGA-DK-A1A3-01A	FALSE	TRUE	-1.17	4.66	0.99	0.67	1.12	TRUE	-1.17	1.99	0.11	0.18	-0.01
TCGA-FJ-A3Z7-01A	FALSE	TRUE	-1.17	2.54	0.83	3.38	0.9	TRUE	-1.17	1.91	0.13	0.16	-0.03
TCGA-KQ-A41R-01A	FALSE	TRUE	-1.17	1.88	0.99	0.57	0.13	TRUE	-1.17	1.62	0.14	0.07	0
TCGA-DK-A6AV-01A	FALSE	TRUE	-1.17	3.3	0.95	0.4	0.92	TRUE	-1.17	1.79	0.15	0.09	0
TCGA-DK-AA6R-01A	FALSE	TRUE	-1.17	4.54	0.99	3.56	0.94	TRUE	-1.17	2.1	0.19	0.14	-0.04
TCGA-XF-AAN1-01A	FALSE	TRUE	-1.17	2.64	0.99	0.43	0.55	TRUE	-1.17	1.82	0.16	0.08	0.01
TCGA-E7-A6ME-01A	FALSE	TRUE	-1.18	4.15	0.98	1.09	2.58	TRUE	-1.18	1.73	0.15	0.09	-0.01
TCGA-FD-A5BY-01A	FALSE	TRUE	-1.18	3.8	0.99	1.66	0.63	TRUE	-1.18	2.22	0.15	0.17	-0.01
TCGA-5N-A9KM-01A	FALSE	TRUE	-1.18	3.64	0.99	0.49	1.67	TRUE	-1.18	1.71	0.09	0.15	-0.01
TCGA-ZF-AA4W-01A	FALSE	TRUE	-1.18	3.58	1	0.94	0.37	TRUE	-1.18	1.94	0.19	0.11	-0.04
TCGA-BT-A3PJ-01A	FALSE	TRUE	-1.18	5.96	0.99	3.85	1.46	TRUE	-1.18	2	0.17	0.15	-0.05
TCGA-2F-A9KT-01A	FALSE	TRUE	-1.2	2.22	0.97	0.2	0.48	TRUE	-1.2	2.18	0.17	0.14	-0.01
TCGA-BT-A20R-01A	FALSE	TRUE	-1.21	3.05	0.98	0.8	0.93	TRUE	-1.21	2.45	0.12	0.24	-0.01
TCGA-E7-A4IJ-01A	FALSE	TRUE	-1.21	3.71	0.96	0.53	1.66	TRUE	-1.21	1.57	0.14	0.08	-0.01
TCGA-DK-A1AA-01A	FALSE	TRUE	-1.21	2.43	0.99	0.4	0.18	TRUE	-1.21	1.77	0.13	0.11	-0.01
TCGA-XF-A8HI-01A	FALSE	TRUE	-1.21	2.13	0.99	0.6	0.36	TRUE	-1.21	1.64	0.14	0.09	-0.01
TCGA-4Z-AA89-01A	FALSE	TRUE	-1.22	3.18	1	0.75	0.65	TRUE	-1.22	1.41	0.14	0.06	-0.02
TCGA-FD-A3SM-01A	FALSE	TRUE	-1.22	2.78	0.99	0.31	0.28	TRUE	-1.22	2.26	0.12	0.21	-0.01
TCGA-XF-AAN2-01A	FALSE	TRUE	-1.22	5.8	1	3.17	1.88	TRUE	-1.22	1.45	0.14	0.1	-0.05
TCGA-XF-AAMX-01A	FALSE	TRUE	-1.22	3.11	0.99	0.38	0.24	TRUE	-1.22	2.02	0.15	0.13	0.01
TCGA-XF-A9SV-01A	FALSE	TRUE	-1.22	2.27	0.98	0.23	0.54	TRUE	-1.22	2.26	0.14	0.18	0
TCGA-DK-A1A6-01A	FALSE	TRUE	-1.22	4.53	0.99	1.96	2.44	TRUE	-1.22	1.37	0.12	0.09	-0.04
TCGA-GD-A2C5-01A	FALSE	TRUE	-1.23	2.19	0.97	0.67	0.17	TRUE	-1.23	2.05	0.13	0.15	0
TCGA-E7-A85H-01A	FALSE	TRUE	-1.23	4.27	0.99	1.97	1.55	TRUE	-1.23	1.71	0.13	0.1	0
TCGA-XF-AAN5-01A	FALSE	TRUE	-1.23	5.89	1	2.97	1.8	TRUE	-1.23	1.73	0.15	0.13	-0.05
TCGA-LT-A5Z6-01A	FALSE	TRUE	-1.23	3.33	1	1.17	1.74	TRUE	-1.23	1.41	0.13	0.04	0.01
TCGA-DK-AA6X-01A	FALSE	TRUE	-1.23	4.02	0.98	0.72	1.52	TRUE	-1.23	1.72	0.11	0.13	-0.01
TCGA-ZF-AA4V-01A	FALSE	TRUE	-1.24	4.69	1	3.46	2.03	TRUE	-1.24	1.91	0.16	0.13	-0.03
TCGA-CF-A27C-01A	FALSE	TRUE	-1.24	2.16	1	0.77	0.55	TRUE	-1.24	1.42	0.13	0.05	0.01
TCGA-FJ-A3Z9-01A	FALSE	TRUE	-1.25	1.43	1	0.66	0.07	TRUE	-1.25	1.75	0.15	0.08	0.01
TCGA-DK-AA77-01A	FALSE	TRUE	-1.25	5.21	1	0.92	1.76	TRUE	-1.25	1.54	0.14	0.08	-0.02
TCGA-GC-A3YS-01A	FALSE	TRUE	-1.25	3.34	0.97	1.9	0.6	TRUE	-1.25	2.46	0.16	0.22	-0.02
TCGA-K4-A6MB-01A	FALSE	TRUE	-1.25	2.26	0.98	0.39	0.33	TRUE	-1.25	2.29	0.15	0.17	0
TCGA-FD-A3N6-01A	FALSE	TRUE	-1.26	5.31	1	1.65	1.49	TRUE	-1.26	1.69	0.16	0.11	-0.04
TCGA-UY-A9PE-01A	FALSE	TRUE	-1.26	2.69	0.98	0.33	0.33	TRUE	-1.26	2.19	0.15	0.15	0.01
TCGA-FD-A5C0-01A	FALSE	TRUE	-1.26	2.48	1	0.31	0.73	TRUE	-1.26	2	0.13	0.15	0
TCGA-CU-A5W6-01A	FALSE	TRUE	-1.26	3.29	1	0.7	0.5	TRUE	-1.26	1.74	0.13	0.12	-0.02
TCGA-E5-A2PC-01A	FALSE	TRUE	-1.26	4.87	0.99	0.75	1.07	TRUE	-1.26	1.64	0.15	0.09	-0.02
TCGA-GC-A3BM-01A	FALSE	TRUE	-1.26	3.99	0.99	0.95	1.33	TRUE	-1.26	1.83	0.15	0.11	-0.01
TCGA-GC-A3RD-01A	FALSE	TRUE	-1.27	2.28	0.97	0.25	0.37	TRUE	-1.27	1.87	0.14	0.12	0
TCGA-YF-AA3M-01A	FALSE	TRUE	-1.27	2.35	0.99	1.04	0.36	TRUE	-1.27	2.04	0.18	0.1	-0.01
TCGA-GV-A6ZA-01A	FALSE	TRUE	-1.27	4.07	1	0.66	1.53	TRUE	-1.27	1.62	0.16	0.06	0
TCGA-ZF-A9R5-01A	FALSE	TRUE	-1.27	2.42	1	0.51	0.96	TRUE	-1.27	1.45	0.12	0.07	0
TCGA-FD-A62O-01A	FALSE	TRUE	-1.28	1.81	0.97	0.3	0.28	TRUE	-1.28	2.09	0.14	0.14	0.01
TCGA-2F-A9KR-01A	FALSE	TRUE	-1.28	3.29	1	0.55	0.88	TRUE	-1.28	1.78	0.15	0.11	-0.02
TCGA-BT-A20V-01A	FALSE	TRUE	-1.28	3.96	0.99	3.98	1.07	TRUE	-1.28	1.79	0.17	0.09	-0.02
TCGA-CF-A47X-01A	FALSE	TRUE	-1.28	1.96	0.99	0.54	0.22	TRUE	-1.28	1.44	0.12	0.06	0.01
TCGA-XF-AAML-01A	FALSE	TRUE	-1.28	4.35	1	1.41	1.04	TRUE	-1.28	1.47	0.15	0.05	-0.01
TCGA-C4-A0F6-01A	FALSE	TRUE	-1.28	3.06	0.99	0.44	0.77	TRUE	-1.28	2.16	0.14	0.16	0.01
TCGA-XF-A8HB-01A	FALSE	TRUE	-1.28	2.84	1	0.34	0.14	TRUE	-1.28	1.73	0.17	0.06	0.01
TCGA-E7-A7PW-01A	FALSE	TRUE	-1.28	2.99	0.99	0.55	0.82	TRUE	-1.28	1.61	0.15	0.06	0.01
TCGA-DK-A1A5-01A	FALSE	TRUE	-1.29	4.82	0.98	1.36	0.91	TRUE	-1.29	2.34	0.15	0.21	-0.02
TCGA-C4-A0F1-01A	FALSE	TRUE	-1.29	4.33	1	1.09	0.32	TRUE	-1.29	2.2	0.17	0.17	-0.03
TCGA-PQ-A6FI-01A	FALSE	TRUE	-1.29	3.85	0.99	0.95	1.15	TRUE	-1.29	1.95	0.19	0.11	-0.04
TCGA-BT-A20U-01A	FALSE	TRUE	-1.29	3.96	1	0.61	0.97	TRUE	-1.29	2.1	0.15	0.16	-0.01
TCGA-2F-A9KW-01A	FALSE	TRUE	-1.29	3.21	0.95	2.95	0.24	TRUE	-1.29	1.87	0.14	0.14	-0.02
TCGA-CF-A9FL-01A	FALSE	TRUE	-1.29	2.02	0.99	0.23	1.19	TRUE	-1.29	2.28	0.15	0.17	0.01
TCGA-S5-AA26-01A	FALSE	TRUE	-1.29	1.19	1	0.32	0.09	TRUE	-1.29	1.97	0.17	0.09	0.01
TCGA-2F-A9KQ-01A	FALSE	TRUE	-1.29	1.39	1	0.22	0.15	TRUE	-1.29	1.92	0.14	0.12	0.01
TCGA-XF-A9T0-01A	FALSE	TRUE	-1.29	3.98	0.99	0.68	1.17	TRUE	-1.29	2.04	0.14	0.13	0.01
TCGA-BT-A20X-01A	FALSE	TRUE	-1.29	4.17	0.99	0.84	1.25	TRUE	-1.29	2.08	0.17	0.17	-0.04
TCGA-GU-AATQ-01A	FALSE	TRUE	-1.3	4.38	0.99	0.34	0.62	TRUE	-1.3	2.02	0.17	0.12	-0.01
TCGA-ZF-AA4N-01A	FALSE	TRUE	-1.3	4.02	0.98	1.6	1.36	TRUE	-1.3	2.31	0.17	0.18	-0.03
TCGA-DK-A2I6-01A	FALSE	TRUE	-1.3	3.99	1	3.7	0.49	TRUE	-1.3	2.22	0.19	0.13	0
TCGA-UY-A78L-01A	FALSE	TRUE	-1.3	3.21	0.99	2.3	0.35	TRUE	-1.3	2.15	0.15	0.17	-0.02
TCGA-FD-A3SJ-01A	FALSE	TRUE	-1.31	3.03	0.97	0.42	0.69	TRUE	-1.31	2.26	0.15	0.16	0.01
TCGA-DK-A3IS-01A	FALSE	TRUE	-1.32	3.58	1	0.32	1.12	TRUE	-1.32	1.79	0.17	0.07	-0.01
TCGA-G2-AA3F-01A	FALSE	TRUE	-1.32	2.58	0.99	0.36	0.27	TRUE	-1.32	1.74	0.13	0.09	0.01
TCGA-UY-A9PD-01A	FALSE	TRUE	-1.33	3.35	0.99	0.35	0.25	TRUE	-1.33	2.28	0.16	0.16	0.01
TCGA-CF-A1HS-01A	FALSE	TRUE	-1.33	3.75	0.97	1.81	0.62	TRUE	-1.33	2.03	0.16	0.14	-0.03
TCGA-DK-A3X1-01A	FALSE	TRUE	-1.33	2.75	0.97	0.51	0.5	TRUE	-1.33	2.11	0.16	0.13	0
TCGA-GU-A42R-01A	FALSE	TRUE	-1.33	1.78	0.97	0.61	0.7	TRUE	-1.33	1.86	0.15	0.1	0
TCGA-K4-A5RI-01A	FALSE	TRUE	-1.33	3.1	0.99	0.49	0.45	TRUE	-1.33	2.23	0.16	0.16	0
TCGA-GC-A4ZW-01A	FALSE	TRUE	-1.34	3.21	0.99	3.23	1.1	TRUE	-1.34	1.7	0.16	0.07	-0.01
TCGA-FD-A3SS-01A	FALSE	TRUE	-1.34	2.43	0.99	2.23	0.26	TRUE	-1.34	2.04	0.15	0.15	-0.01
TCGA-E5-A4TZ-01A	FALSE	TRUE	-1.34	2.47	0.99	0.87	0.32	TRUE	-1.34	1.54	0.15	0.05	0
TCGA-4Z-AA7Y-01A	FALSE	TRUE	-1.34	2.16	1	0.34	0.13	TRUE	-1.34	1.82	0.15	0.1	-0.01
TCGA-DK-AA75-01A	FALSE	TRUE	-1.35	1.74	0.96	1.17	0.36	TRUE	-1.35	1.89	0.18	0.05	0.02
TCGA-GV-A3QH-01A	FALSE	TRUE	-1.35	2.32	0.98	0.76	1.17	TRUE	-1.35	1.66	0.17	0.06	-0.01
TCGA-ZF-AA4U-01A	FALSE	TRUE	-1.35	3.04	1	0.19	0.64	TRUE	-1.35	1.67	0.16	0.07	0
TCGA-GV-A3QF-01A	FALSE	TRUE	-1.35	1.65	0.98	0.29	0.02	TRUE	-1.35	1.67	0.15	0.07	0
TCGA-ZF-A9RN-01A	FALSE	TRUE	-1.35	5.62	0.99	3.61	4.85	TRUE	-1.35	1.54	0.15	0.05	0
TCGA-4Z-AA7S-01A	FALSE	TRUE	-1.37	1.69	1	0.31	0.09	TRUE	-1.37	1.82	0.15	0.09	0.01
TCGA-YC-A9TC-01A	FALSE	TRUE	-1.37	2.31	1	4.61	1.66	TRUE	-1.37	2.16	0.18	0.11	0.02
TCGA-ZF-AA4R-01A	FALSE	TRUE	-1.38	4.73	0.98	1.08	0.93	TRUE	-1.38	2.66	0.17	0.23	-0.01
TCGA-FT-A3EE-01A	FALSE	TRUE	-1.38	2.03	0.99	2.5	0.29	TRUE	-1.38	2.21	0.16	0.15	0
TCGA-BL-A3JM-01A	FALSE	TRUE	-1.38	3.93	0.99	1.26	1.91	TRUE	-1.38	2.19	0.17	0.13	0
TCGA-DK-A1AD-01A	FALSE	TRUE	-1.39	3.67	0.97	0.39	1.06	TRUE	-1.39	1.96	0.13	0.13	0.01
TCGA-GV-A3JZ-01A	FALSE	TRUE	-1.39	3.59	0.95	3.12	0.91	TRUE	-1.39	2.15	0.16	0.14	-0.01
TCGA-4Z-AA87-01A	FALSE	TRUE	-1.39	3.77	0.99	3.25	1.39	TRUE	-1.39	1.64	0.15	0.07	0
TCGA-ZF-A9R4-01A	FALSE	TRUE	-1.4	4.27	1	1.04	0.8	TRUE	-1.4	1.29	0.12	0.04	0
TCGA-XF-AAN7-01A	FALSE	TRUE	-1.41	3.64	0.94	0.62	0.54	TRUE	-1.41	2.81	0.2	0.21	0
TCGA-G2-AA3B-01A	FALSE	TRUE	-1.41	4.13	0.99	0.9	0.95	TRUE	-1.41	1.44	0.14	0.04	0
TCGA-ZF-AA4X-01A	FALSE	TRUE	-1.41	2.81	1	1.48	0.3	TRUE	-1.41	1.46	0.14	0.05	0
TCGA-DK-A6B1-01A	FALSE	TRUE	-1.41	2.49	0.99	0.67	1.08	TRUE	-1.41	1.82	0.14	0.1	0.01
TCGA-K4-A3WV-01A	FALSE	TRUE	-1.41	2.29	1	1.99	0.47	TRUE	-1.41	2.19	0.17	0.15	-0.01
TCGA-GC-A3RB-01A	FALSE	TRUE	-1.41	3.03	0.99	0.51	0.57	TRUE	-1.41	1.99	0.18	0.1	0
TCGA-FD-A5BV-01A	FALSE	TRUE	-1.42	1.69	0.99	0.53	0.56	TRUE	-1.42	2.29	0.18	0.14	0.01
TCGA-GU-A42Q-01A	FALSE	TRUE	-1.42	2.43	1	0.24	0.29	TRUE	-1.42	2.32	0.2	0.14	-0.01
TCGA-DK-AA6P-01A	FALSE	TRUE	-1.43	1.8	0.99	0.15	0.17	TRUE	-1.43	1.73	0.14	0.08	0.02
TCGA-BT-A42C-01A	FALSE	TRUE	-1.43	2.18	0.98	0.41	0.81	TRUE	-1.43	1.78	0.15	0.1	0
TCGA-GV-A3JW-01A	FALSE	TRUE	-1.43	1.39	0.99	0.17	0.3	TRUE	-1.43	1.85	0.15	0.09	0.02
TCGA-ZF-A9R2-01A	FALSE	TRUE	-1.43	1.61	1	0.33	0.07	TRUE	-1.43	1.69	0.16	0.07	0
TCGA-BT-A2LA-01A	FALSE	TRUE	-1.44	1.97	0.99	0.11	1.95	TRUE	-1.44	2.68	0.23	0.14	0.02
TCGA-DK-AA6U-01A	FALSE	TRUE	-1.44	2.67	0.97	1	0.64	TRUE	-1.44	1.9	0.17	0.08	0.01
TCGA-XF-A8HC-01A	FALSE	TRUE	-1.44	1.29	1	0.65	0.11	TRUE	-1.44	1.62	0.15	0.05	0.02
TCGA-GV-A40G-01A	FALSE	TRUE	-1.44	2.27	0.98	0.22	0.1	TRUE	-1.44	1.68	0.15	0.06	0.01
TCGA-UY-A78N-01A	FALSE	TRUE	-1.45	1.89	1	0.6	0.3	TRUE	-1.45	2.4	0.19	0.13	0.02
TCGA-C4-A0EZ-01A	FALSE	TRUE	-1.46	2.5	0.99	0.15	0.48	TRUE	-1.46	2.21	0.2	0.09	0.02
TCGA-XF-AAMG-01A	FALSE	TRUE	-1.46	2.98	0.95	0.83	1.31	TRUE	-1.46	2.34	0.18	0.15	0.01
TCGA-2F-A9KP-01A	FALSE	TRUE	-1.46	1.63	0.99	0.28	0.24	TRUE	-1.46	1.94	0.17	0.09	0.01
TCGA-ZF-AA4T-01A	FALSE	TRUE	-1.46	2.87	0.98	1.29	0.24	TRUE	-1.46	1.72	0.16	0.07	-0.01
TCGA-BL-A0C8-01A	FALSE	TRUE	-1.47	2.53	0.99	0.71	0.09	TRUE	-1.47	1.59	0.1	0.11	0
TCGA-H4-A2HQ-01A	FALSE	TRUE	-1.47	3.73	0.97	0.72	1.52	TRUE	-1.47	1.92	0.17	0.1	-0.01
TCGA-CU-A3QU-01A	FALSE	TRUE	-1.47	2.45	1	2.37	0.21	TRUE	-1.47	1.46	0.14	0.05	0
TCGA-ZF-A9RM-01A	FALSE	TRUE	-1.47	1.32	1	0.75	0.52	TRUE	-1.47	1.58	0.15	0.05	0.01
TCGA-CU-A3KJ-01A	FALSE	TRUE	-1.48	4.11	0.99	1.11	1.49	TRUE	-1.48	1.8	0.15	0.15	-0.05
TCGA-DK-A1AC-01A	FALSE	TRUE	-1.48	4.55	0.99	4.3	2.42	TRUE	-1.48	1.69	0.13	0.12	-0.03
TCGA-4Z-AA84-01A	FALSE	TRUE	-1.49	2.31	0.99	2.51	0.72	TRUE	-1.49	2.06	0.18	0.11	-0.01
TCGA-G2-A3VY-01A	FALSE	TRUE	-1.5	2.17	0.96	0.49	0.67	TRUE	-1.5	1.67	0.14	0.07	0.02
TCGA-DK-AA6W-01A	FALSE	TRUE	-1.51	3.93	0.99	0.53	0.58	TRUE	-1.51	2.16	0.18	0.1	0.02
TCGA-HQ-A2OE-01A	FALSE	TRUE	-1.51	2.64	0.96	1.65	0.76	TRUE	-1.51	1.47	0.14	0.06	-0.01
TCGA-KQ-A41Q-01A	FALSE	TRUE	-1.51	1.57	0.97	0.58	0.17	TRUE	-1.51	1.87	0.16	0.09	0.01
TCGA-ZF-A9RE-01A	FALSE	TRUE	-1.51	3.1	1	0.37	0.37	TRUE	-1.51	1.68	0.16	0.08	-0.02
TCGA-C4-A0F0-01A	FALSE	TRUE	-1.53	3.9	1	1.81	1.36	TRUE	-1.53	2.4	0.19	0.16	-0.01
TCGA-HQ-A5ND-01A	FALSE	TRUE	-1.53	4.27	1	0.35	0.94	TRUE	-1.53	1.99	0.19	0.1	-0.02
TCGA-BL-A13J-01A	FALSE	TRUE	-1.53	3.19	0.99	1.67	0.75	TRUE	-1.53	2.32	0.14	0.2	-0.02
TCGA-GU-A42P-01A	FALSE	TRUE	-1.54	1.85	0.99	0.31	0.59	TRUE	-1.54	1.88	0.16	0.09	0.01
TCGA-E7-A5KE-01A	FALSE	TRUE	-1.55	1.51	0.99	0.48	0.05	TRUE	-1.55	1.85	0.17	0.06	0.03
TCGA-DK-AA76-01A	FALSE	TRUE	-1.55	1.31	0.99	0.21	0.14	TRUE	-1.55	1.74	0.15	0.06	0.02
TCGA-4Z-AA7R-01A	FALSE	TRUE	-1.55	2.37	0.98	0.18	1.1	TRUE	-1.55	2.19	0.18	0.12	0.01
TCGA-DK-A3X2-01A	FALSE	TRUE	-1.55	1.72	1	0.81	0.41	TRUE	-1.55	1.88	0.18	0.07	0
TCGA-FD-A6TE-01A	FALSE	TRUE	-1.55	4.33	1	1.91	0.84	TRUE	-1.55	1.66	0.15	0.08	-0.01
TCGA-4Z-AA7M-01A	FALSE	TRUE	-1.56	2.04	0.95	0.62	0.64	TRUE	-1.56	2.15	0.16	0.12	0.02
TCGA-ZF-A9RL-01A	FALSE	TRUE	-1.57	1.89	0.99	0.32	0.24	TRUE	-1.57	1.62	0.14	0.06	0.02
TCGA-4Z-AA80-01A	FALSE	TRUE	-1.58	3.09	0.99	0.79	0.86	TRUE	-1.58	1.74	0.17	0.07	0
TCGA-HQ-A2OF-01A	FALSE	TRUE	-1.58	1.72	0.97	0.17	0.68	TRUE	-1.58	1.67	0.15	0.06	0.01
TCGA-DK-A3IM-01A	FALSE	TRUE	-1.59	2.6	0.99	0.43	0.22	TRUE	-1.59	2.18	0.21	0.11	-0.01
TCGA-BT-A0S7-01A	FALSE	TRUE	-1.62	2.25	1	0.17	2.14	TRUE	-1.62	2.33	0.16	0.15	0.02
TCGA-C4-A0F7-01A	FALSE	TRUE	-1.62	2.31	0.99	0.71	0.31	TRUE	-1.62	2.2	0.17	0.13	0
TCGA-FJ-A3ZF-01A	FALSE	TRUE	-1.62	1.86	0.98	0.65	0.25	TRUE	-1.62	1.81	0.16	0.05	0.03
TCGA-XF-A9ST-01A	FALSE	TRUE	-1.66	1.3	1	1.94	0.08	TRUE	-1.66	2.18	0.19	0.09	0.02
TCGA-DK-A1AE-01A	FALSE	TRUE	-1.68	3.42	1	0.87	0.52	TRUE	-1.68	2.11	0.17	0.12	0
TCGA-FJ-A3ZE-01A	FALSE	TRUE	-1.71	1.49	1	0.11	0.27	TRUE	-1.71	1.74	0.15	0.08	0.01
TCGA-G2-A2EL-01A	FALSE	TRUE	-1.72	2.49	1	0.61	0.44	TRUE	-1.72	2.02	0.2	0.07	0.01
TCGA-BT-A20N-01A	FALSE	TRUE	-1.73	3.02	0.99	0.35	0.25	TRUE	-1.73	2.25	0.17	0.14	0.01
TCGA-GV-A3QI-01A	FALSE	TRUE	-1.74	2.09	1	1.52	0.66	TRUE	-1.74	2.07	0.18	0.09	0.01
