# Supplementary material
Source: Research Square preprint supplement (doi:10.21203/rs.3.rs-8947218/v1)
Supplement: Supplementary file 13 [file d0bf9661ce6e5e72c9f110e0.xlsx]

## Sheet: LM22_ssGSEA
	TCGA-BT-A2LB-01	TCGA-GV-A3QI-01	TCGA-XF-A8HF-01	TCGA-E7-A6ME-01	TCGA-DK-A1AC-01	TCGA-CU-A3YL-01	TCGA-UY-A8OD-01	TCGA-KQ-A41O-01	TCGA-FD-A3SR-01	TCGA-FD-A6TA-01	TCGA-GU-AATO-01	TCGA-BT-A3PJ-01	TCGA-4Z-AA7S-01	TCGA-DK-A3IS-01	TCGA-FD-A5BZ-01	TCGA-DK-AA75-01	TCGA-BT-A20N-01	TCGA-2F-A9KT-01	TCGA-DK-A3IK-01	TCGA-XF-AAN1-01	TCGA-E5-A4U1-01	TCGA-4Z-AA7R-01	TCGA-BT-A3PH-01	TCGA-XF-AAMX-01	TCGA-XF-AAMY-01	TCGA-DK-A3X1-01	TCGA-GD-A3OP-01	TCGA-E5-A4TZ-01	TCGA-K4-A6MB-01	TCGA-HQ-A2OE-01	TCGA-GV-A40E-01	TCGA-DK-AA6U-01	TCGA-ZF-AA51-01	TCGA-DK-AA6S-01	TCGA-5N-A9KM-01	TCGA-GV-A3JV-01	TCGA-GV-A3JZ-01	TCGA-LT-A8JT-01	TCGA-2F-A9KP-01	TCGA-XF-AAMZ-01	TCGA-4Z-AA81-01	TCGA-K4-A54R-01	TCGA-DK-AA76-01	TCGA-GC-A6I3-01	TCGA-GD-A3OQ-01	TCGA-ZF-A9RM-01	TCGA-YF-AA3M-01	TCGA-4Z-AA84-01	TCGA-E7-A85H-01
B cells memory	0.56432	0.357556	0.506095	0.511856	0.553642	0.432037	0.589398	0.31278	0.557446	0.617225	0.596251	0.517355	0.503124	0.446381	0.527364	0.405207	0.479884	0.409698	0.545474	0.459161	0.36732	0.447342	0.423801	0.468846	0.505113	0.464325	0.542015	0.4881	0.413926	0.495579	0.460859	0.464552	0.58543	0.529629	0.528371	0.562794	0.490126	0.532475	0.494738	0.624418	0.54387	0.501391	0.370038	0.614676	0.476333	0.388101	0.483933	0.506866	0.523672
B cells naive	0.577656	0.404248	0.515236	0.515442	0.540975	0.444642	0.586802	0.346015	0.550475	0.614076	0.573238	0.492715	0.526554	0.441363	0.55034	0.436069	0.488342	0.44756	0.548255	0.480842	0.401122	0.469299	0.452927	0.467243	0.501524	0.46839	0.565142	0.52322	0.443617	0.522087	0.471265	0.495702	0.577499	0.521825	0.54602	0.576343	0.512734	0.55246	0.508769	0.625722	0.52903	0.517715	0.399508	0.603003	0.492726	0.399405	0.493009	0.507251	0.54019
Dendritic cells activated	0.684514	0.487686	0.613369	0.619892	0.680128	0.565941	0.660379	0.378965	0.686508	0.673504	0.665109	0.710161	0.551629	0.518997	0.639007	0.530323	0.567238	0.532435	0.58131	0.569038	0.456886	0.54884	0.590998	0.560414	0.614593	0.600736	0.624436	0.585666	0.582033	0.603854	0.680794	0.576144	0.701504	0.692858	0.619528	0.647916	0.618773	0.596978	0.535118	0.619888	0.672895	0.701646	0.48792	0.711829	0.613763	0.479058	0.580869	0.591267	0.646663
Dendritic cells resting	0.664914	0.496689	0.631738	0.554184	0.647883	0.57324	0.667104	0.36696	0.662542	0.685819	0.661376	0.671495	0.574339	0.545153	0.638913	0.502339	0.567116	0.560752	0.559746	0.576836	0.465429	0.508575	0.564468	0.563305	0.631164	0.61919	0.643758	0.600415	0.60769	0.6176	0.65332	0.562813	0.688366	0.687624	0.593229	0.667798	0.619624	0.610847	0.540357	0.639093	0.633512	0.697644	0.481975	0.708331	0.61772	0.491738	0.597764	0.531009	0.6472
Endothelial cells	0.708561	0.715632	0.69095	0.65079	0.66456	0.776402	0.7493	0.586188	0.670889	0.71875	0.631873	0.707831	0.727449	0.715691	0.754386	0.686361	0.661232	0.67752	0.707837	0.728577	0.643873	0.717021	0.732992	0.687433	0.729017	0.688954	0.758039	0.589771	0.703369	0.684488	0.634195	0.632399	0.728709	0.694806	0.688105	0.74044	0.704158	0.664119	0.713678	0.705123	0.609685	0.660094	0.678301	0.625662	0.696098	0.652038	0.662784	0.664433	0.646874
Eosinophils	0.623735	0.447396	0.55144	0.523343	0.572919	0.504305	0.563519	0.411379	0.557739	0.592138	0.556978	0.58955	0.51193	0.484965	0.558839	0.460957	0.513128	0.544444	0.515245	0.518309	0.462522	0.471358	0.540851	0.487577	0.591536	0.528334	0.56137	0.522274	0.544269	0.551678	0.571654	0.516066	0.593792	0.566527	0.580584	0.546273	0.522734	0.532237	0.530625	0.577845	0.54826	0.58166	0.447499	0.535849	0.569476	0.449598	0.550353	0.5425	0.509268
Fibroblasts	1.04224	0.853772	1.02325	0.934856	0.996905	0.976081	1.01565	0.735187	1.0069	1.04804	0.994228	0.978786	0.972279	0.84862	1.04982	0.873584	0.984128	0.983245	1.03345	0.925624	0.798726	0.992391	0.977441	0.986588	1.01612	0.977065	1.05364	0.820194	1.05658	0.821718	1.01626	0.864464	1.03612	1.0536	0.993172	1.01139	1.02831	0.919901	0.924475	1.00536	0.914874	1.03222	0.822608	0.980937	0.985626	0.726472	0.97063	0.962255	1.00252
Macrophages M0	0.716159	0.473528	0.632579	0.594154	0.712365	0.538497	0.69956	0.37011	0.682108	0.695365	0.730361	0.7369	0.537222	0.484293	0.690149	0.493482	0.603372	0.640623	0.595747	0.550614	0.375757	0.598226	0.625549	0.611389	0.667247	0.636354	0.610223	0.603057	0.621591	0.587957	0.741944	0.567012	0.739394	0.71755	0.620511	0.657395	0.699272	0.581928	0.537368	0.608558	0.682162	0.75442	0.527087	0.702691	0.653371	0.486584	0.635187	0.649761	0.664102
Macrophages M1	0.744572	0.498001	0.676273	0.677549	0.737218	0.626966	0.694963	0.433915	0.756924	0.744253	0.735082	0.75554	0.58245	0.599758	0.686664	0.58296	0.61031	0.606216	0.639535	0.616234	0.500959	0.58791	0.630636	0.630426	0.651515	0.637616	0.674824	0.628976	0.626042	0.627433	0.727679	0.639796	0.76638	0.751223	0.693995	0.691633	0.65621	0.636703	0.575192	0.659905	0.728946	0.77837	0.513923	0.762544	0.647777	0.525079	0.596608	0.635647	0.720211
Macrophages M2	0.66335	0.467723	0.624597	0.57993	0.637813	0.554104	0.6574	0.385838	0.669907	0.681439	0.680407	0.642319	0.556475	0.48794	0.663213	0.500263	0.554482	0.560034	0.572432	0.546042	0.433041	0.57746	0.542108	0.597624	0.635399	0.618372	0.660033	0.566771	0.593138	0.574524	0.6563	0.550838	0.684139	0.672785	0.636847	0.637091	0.633395	0.576581	0.519635	0.620481	0.62861	0.680548	0.463406	0.69873	0.594253	0.458499	0.584025	0.558469	0.657215
Mast cells activated	0.529129	0.315038	0.464527	0.438548	0.491657	0.380365	0.513591	0.273422	0.458778	0.485739	0.505411	0.47174	0.451443	0.3907	0.501828	0.426615	0.413791	0.433192	0.424377	0.424988	0.333883	0.388493	0.422186	0.383776	0.510384	0.444929	0.461306	0.394435	0.443015	0.41402	0.515397	0.435971	0.491107	0.483413	0.460384	0.480378	0.449521	0.42944	0.41682	0.494607	0.448976	0.494935	0.380577	0.483688	0.480559	0.326675	0.505412	0.445151	0.420104
Mast cells resting	0.524875	0.389256	0.479289	0.465469	0.462786	0.457947	0.554751	0.34019	0.538401	0.532293	0.53552	0.462698	0.498297	0.453338	0.557375	0.467394	0.42197	0.429374	0.454972	0.460952	0.434768	0.384857	0.4394	0.443657	0.527018	0.464193	0.533244	0.443886	0.487469	0.427927	0.486823	0.472947	0.477092	0.509135	0.525838	0.516448	0.472432	0.455883	0.4391	0.54234	0.464402	0.488473	0.427954	0.484377	0.492667	0.362999	0.52903	0.456536	0.449175
Monocytes	0.677484	0.431011	0.61381	0.567413	0.646271	0.551855	0.643902	0.369698	0.648006	0.665919	0.707805	0.672328	0.529082	0.53764	0.618521	0.511986	0.545192	0.600707	0.535372	0.532423	0.43081	0.513341	0.56552	0.560303	0.647432	0.596155	0.606283	0.554231	0.595125	0.58747	0.656293	0.558944	0.680618	0.64126	0.646233	0.587401	0.592211	0.560934	0.536616	0.608104	0.599644	0.66612	0.46108	0.660841	0.633613	0.449656	0.595432	0.544402	0.594802
Neutrophils	0.638684	0.393686	0.519423	0.493948	0.53785	0.455329	0.531478	0.323676	0.537378	0.570106	0.598138	0.627785	0.463541	0.441021	0.522453	0.452698	0.499175	0.572641	0.450797	0.464361	0.371285	0.455292	0.529278	0.469286	0.587397	0.484357	0.518646	0.499102	0.529233	0.522143	0.621545	0.509	0.610773	0.553508	0.537442	0.49679	0.5103	0.476228	0.499671	0.559504	0.534187	0.58821	0.396618	0.541932	0.593066	0.386792	0.547788	0.51477	0.50286
NK cells activated	0.57251	0.358889	0.501334	0.528641	0.597953	0.474368	0.529297	0.259261	0.551427	0.555485	0.556984	0.609568	0.409145	0.471752	0.479708	0.399394	0.435999	0.437296	0.468729	0.434972	0.363773	0.338592	0.449867	0.423564	0.461093	0.503916	0.525486	0.407409	0.437837	0.490681	0.535566	0.480875	0.589775	0.559354	0.556311	0.567272	0.49849	0.495318	0.416366	0.526269	0.656381	0.660287	0.336381	0.592292	0.491021	0.36708	0.460374	0.453957	0.541584
NK cells resting	0.522987	0.322709	0.461147	0.473179	0.520011	0.425679	0.476234	0.267438	0.510481	0.499394	0.513388	0.530149	0.385098	0.412397	0.453259	0.40204	0.402748	0.397813	0.419128	0.417008	0.379349	0.302724	0.402004	0.39237	0.431138	0.452106	0.479833	0.375627	0.413176	0.423002	0.465777	0.434042	0.534984	0.504695	0.509229	0.508763	0.438989	0.460811	0.397944	0.480422	0.580939	0.588317	0.317961	0.542283	0.455315	0.350081	0.41802	0.414814	0.463473
Plasma cells	0.562251	0.439464	0.525843	0.546878	0.560867	0.471501	0.561314	0.418631	0.485383	0.614967	0.593868	0.509958	0.498735	0.461282	0.53621	0.477375	0.522922	0.457135	0.546866	0.481258	0.403913	0.508961	0.479677	0.506097	0.510822	0.500261	0.531483	0.507892	0.430594	0.542159	0.469652	0.491933	0.593929	0.524463	0.537836	0.539552	0.538175	0.508882	0.500736	0.581787	0.563121	0.540568	0.411309	0.603484	0.488569	0.437925	0.508178	0.527065	0.555461
T cells CD4 memory activated	0.535075	0.348398	0.464234	0.50734	0.588685	0.435488	0.506004	0.223869	0.509968	0.538832	0.541652	0.615261	0.421399	0.467985	0.438775	0.397652	0.438949	0.411247	0.432946	0.405253	0.303615	0.384813	0.449751	0.44474	0.420076	0.472201	0.463033	0.40661	0.420244	0.47864	0.531084	0.437924	0.601401	0.559464	0.510228	0.544628	0.480611	0.490158	0.412673	0.543192	0.611883	0.618271	0.331911	0.599129	0.471983	0.343656	0.467884	0.445554	0.526615
T cells CD4 memory resting	0.622261	0.423216	0.559132	0.576111	0.661423	0.53505	0.626914	0.335459	0.636538	0.648369	0.61531	0.628569	0.53664	0.539004	0.552887	0.477538	0.494678	0.48072	0.535023	0.527362	0.425636	0.435971	0.512982	0.530681	0.527599	0.546102	0.612275	0.480895	0.522981	0.56277	0.548937	0.498225	0.672164	0.637555	0.605488	0.641718	0.547641	0.602703	0.499898	0.634983	0.670058	0.678305	0.4409	0.67055	0.55235	0.458062	0.527625	0.48443	0.599812
T cells CD4 naive	0.642723	0.491474	0.585603	0.578652	0.622501	0.568738	0.623164	0.417206	0.61809	0.656301	0.613205	0.622184	0.568226	0.560874	0.576832	0.514546	0.539672	0.544247	0.565783	0.548893	0.502768	0.473634	0.53547	0.560879	0.555058	0.559784	0.604123	0.547323	0.565982	0.584881	0.603794	0.540832	0.665049	0.630928	0.608678	0.642438	0.556607	0.599402	0.528979	0.64079	0.66857	0.662824	0.47297	0.690504	0.578833	0.480146	0.561221	0.52788	0.607849
T cells CD8	0.604468	0.401955	0.538434	0.553629	0.64634	0.528156	0.585543	0.308388	0.604587	0.611875	0.596361	0.607143	0.481642	0.519979	0.526971	0.434465	0.479803	0.444274	0.502204	0.494281	0.401844	0.386865	0.466562	0.491389	0.496092	0.529105	0.582799	0.450857	0.478628	0.548373	0.550493	0.494623	0.635074	0.610176	0.58722	0.615765	0.51961	0.562998	0.45021	0.591175	0.676702	0.681865	0.385253	0.667784	0.532036	0.422629	0.499065	0.483265	0.567801
T cells follicular helper	0.595482	0.422737	0.553173	0.563233	0.633256	0.516256	0.604922	0.365941	0.581052	0.61836	0.594055	0.58997	0.530254	0.531188	0.533748	0.465154	0.506642	0.47836	0.519849	0.513427	0.440677	0.454495	0.497253	0.502713	0.509316	0.552878	0.571626	0.476323	0.508317	0.545061	0.535528	0.474723	0.648157	0.626198	0.570502	0.616595	0.534754	0.589196	0.493936	0.623973	0.628451	0.642648	0.418577	0.659901	0.530903	0.435992	0.52082	0.494164	0.587173
T cells gamma delta	0.53859	0.41018	0.49987	0.529713	0.589357	0.494938	0.53402	0.333833	0.555769	0.534857	0.554888	0.572078	0.434419	0.489753	0.475777	0.428347	0.47274	0.415991	0.473803	0.482997	0.41438	0.378316	0.458576	0.453623	0.450429	0.502407	0.543144	0.439412	0.454965	0.495724	0.520107	0.478889	0.571904	0.556001	0.549688	0.56912	0.504537	0.518352	0.420516	0.549051	0.608176	0.619597	0.338805	0.597861	0.48631	0.411496	0.477967	0.447377	0.520443
T cells regulatory (Tregs)	0.585746	0.444851	0.561843	0.532893	0.600101	0.520016	0.586388	0.352721	0.587171	0.616968	0.58219	0.592383	0.51307	0.529119	0.543246	0.465765	0.510184	0.467737	0.525262	0.500751	0.453374	0.452171	0.490888	0.517292	0.526548	0.536017	0.564173	0.524157	0.532911	0.525123	0.561053	0.500333	0.636363	0.610824	0.538322	0.590652	0.520368	0.556139	0.482499	0.600779	0.620947	0.623727	0.445896	0.630622	0.544015	0.450555	0.517431	0.510019	0.579298
[truncated: 357 more columns]
