# Supplementary material
Source: Research Square preprint supplement (doi:10.21203/rs.3.rs-8947218/v1)
Supplement: Supplementary file 15 [file fbd6b075540e2eac7754c006.xlsx]

## Sheet: Sheet1
Characteristic	CIMP-L	CIMP-H	P
Number of patients	266	145
Age (mean(sd))	67.25(10.61)	69.45(10.42)	0.19
Gender(Male%)	187(70)	116(80)	1
Pathologic_M(%)			0.21
M0	130(48.87)	67(46.21)
M1	7(2.63)	4(2.76)
MX	127(47.75)	73(50.34)
Not available	2(0.75)	1(0.69)
Pathologic_N(%)			0.32
N0	158(59.4)	80(55.17)
N1	26(9.77)	22(15.17)
N2	49(18.42)	27(18.62)
N3	4(1.51)	3(2.07)
NX	26(9.77)	10(6.9)
Not available	3(1.13)	3(2.07)
Pathologic_Stage(%)			0.09
Stage I	1(0.38)	1(0.69)
Stage II	86(32.33)	44(30.35)
Stage III	95(35.71)	46(31.72)
Stage IV	83(31.20)	53(36.55)
Not available	1(0.38)	1(0.69)
Pathologic_T(%)			0.24
T0	0	1(0.69)
T1	2(0.75)	1(0.69)
T2	80(30.08)	40(27.58)
T3	131(49.24)	64(44.14)
T4	32(12.03)	27(18.62)
TX	1(0.38)	0
Not available	20(7.52)	12(8.28)
Family_History	102(38.35)	48(33.10)	1
(Yes %)
Pathologic_Grade	245(92.11)	142(97.93)	0.19
(High grade%)
Race(%)			0.21
Asian	35(13.16)	8(5.52)
Black	16(6.02)	7(4.83)
White	206(77.44)	120(82.75)
Not available	9(3.38)	10(6.90)
